# Supplementary material for: Visible-light induced FeCl3-catalyzed reductive transamidation of N-acyl benzotriazoles with nitro compounds
Source: Royal Society of Chemistry journal article supplement (doi:10.1039/d3qo02111d), 2024-01-01

## SUPPORTING INFORMATION

### Visible-Light Induced FeCl<sub>3</sub>-Catalyzed Reductive Transamidation of *N*-Acyl Benzotriazoles with Nitro Compounds

Riqian Zhu,<sup>a</sup> Yang Li,<sup>a</sup> Yue Shen,<sup>a</sup> Mengni Pan,<sup>a</sup> Wuheng Dong<sup>\*b</sup> and Wanfang Li<sup>\*a</sup>

<sup>a</sup>School of Materials and Chemistry, University of Shanghai for Science and Technology, Shanghai,  
200093, P. R. China, E-mail: [lwf@usst.edu.cn](mailto:lwf@usst.edu.cn)

<sup>b</sup>Medicine Center, Guangxi University of Science and Technology, Liuzhou, Guangxi,  
545006, P. R. China, E-mail: [wuheng190429@gxust.edu.cn](mailto:wuheng190429@gxust.edu.cn)

### Table of Contents

|                                                                               |     |
|-------------------------------------------------------------------------------|-----|
| 1. General Information.....                                                   | S2  |
| 2. Synthesis of Starting Materials .....                                      | S3  |
| 2.1 Preparation of <i>N</i> -acyl benzotriazoles .....                        | S3  |
| 2.2 Preparation of <i>N</i> -acyl amides <b>1a-S1-5</b> .....                 | S4  |
| 2.3 Preparation of nitro compound <b>2p</b> .....                             | S4  |
| 2.4 Preparation of intermediate <b>6a</b> .....                               | S4  |
| 3. Studies on the FeCl <sub>3</sub> -Catalyzed Reductive Transamidation ..... | S5  |
| 3.1 General procedure .....                                                   | S5  |
| 3.2 UV-VIS Study .....                                                        | S7  |
| 3.4 Visible light irradiation on/off experiment.....                          | S8  |
| 4. Characterization Data for the Products .....                               | S8  |
| 5. References.....                                                            | S24 |
| 6. Copies of NMR Spectra .....                                                | S26 |

## 1. General Information

All the visible-light induced FeCl<sub>3</sub>-catalyzed reactions were set up using standard Schlenk techniques and carried out under N<sub>2</sub> atmosphere with solvents. All chemicals were obtained from commercial sources and used as received without further purification. The super-dry solvents (1,4-dioxane, PhCF<sub>3</sub>, THF, DMF, MeCN, etc) for catalytic reactions were purchased from Adamas stored in sure-seal bottles with molecular sieves as the desiccants.

Analytical thin layer chromatography (TLC) was performed on silica gel 60 F254 glass plates. TLC plates were visualized by exposure to short wave ultraviolet light (254 nm, 365 nm) and/or iodine. The products were isolated by flash column chromatography on silica gel (300–400 mesh).

NMR spectra were recorded on a *Bruker AVANCE NEO* 400MHz/500MHz spectrometer at 25 °C in CDCl<sub>3</sub> or DMSO. Data are reported as following: chemical shift ( $\delta$ ), multiplicity (s = singlet, d = doublet, t = triplet, q = quartet, br = broad, m = multiplet), coupling constants (Hz), and integration. Chemical shifts (ppm) are given relative to solvent: reference for CDCl<sub>3</sub> was 7.26 ppm (<sup>1</sup>H NMR) and 77.0 ppm (<sup>13</sup>C NMR); references for *d*<sub>6</sub>-DMSO were 2.50 ppm (<sup>1</sup>H NMR) and 39.52 ppm (<sup>13</sup>C NMR). High-resolution mass spectrometry (HRMS) was measured on an *Agilent 1290-6545XT* mass spectrometer. UV-VIS absorbance spectra were measured on a TU-1901 made in China.

## 2. Synthesis of Starting Materials

### 2.1 Preparation of *N*-acyl benzotriazoles

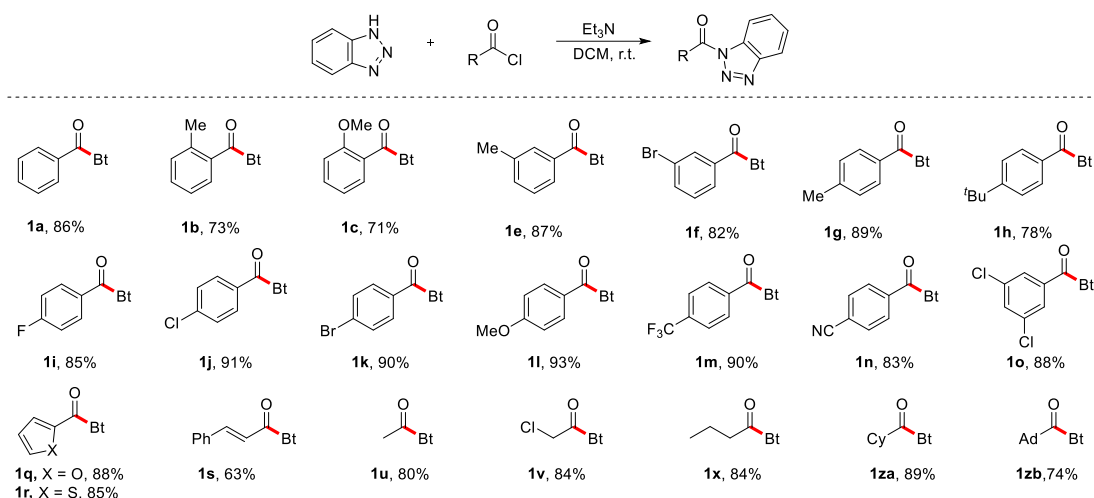

**General Procedure A:**<sup>1</sup> To a solution of benzotriazole (1.0 g, 8.4 mmol) and  $Et_3N$  (1.5 mL, 10.9 mmol) in anhydrous DCM (10 mL) was added the corresponding acyl chloride (10.1 mmol) dissolving in DCM (6 mL) at 0 °C under  $N_2$ . After stirring for 2 h, the reaction mixture was washed sequentially with 10% aq. HCl ( $3 \times 5$  mL), saturated aqueous  $NaHCO_3$  (5 mL) and brine (5 mL) before drying over anhydrous  $Na_2SO_4$ . After removing of the solvent by rotoevaporation, the crude product was purified by flash column chromatography (Petroleum Ether/Ethyl Acetate). The compounds **1a**, **1b**, **1c**, **1e**, **1f**, **1g**, **1i**, **1j**, **1k**, **1l**, **1m**, **1n**, **1o**, **1q**, **1r**, **1s**, **1u**, **1v**, **1x**, **1za** and **1zb** were prepared by this procedure.

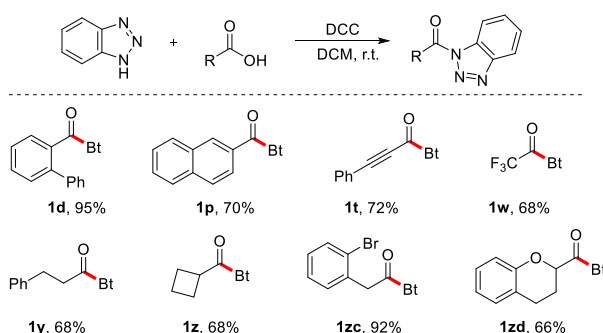

**General Procedure B:**<sup>2</sup> To a solution of benzotriazole (1.0 g, 8.39 mmol) and carboxylic acid (10.07 mmol, 1.2 equiv) in DCM (15 mL) was added 1, 3-dicyclohexylcarbodiimide (2.6 g, 12.6 mmol). The mixture was then stirred at room

temperature for 10 h. The precipitate was removed by filtration and the residue was concentrated in vacuo. The crude reaction mixture was then purified by flash column chromatography (Petroleum ether/Ethyl acetate) to afford the corresponding *N*-acyl benzotriazoles. The compounds **1d**, **1p**, **1t**, **1w**, **1y**, **1z**, **1zc** and **1zd** were prepared by this procedure.

## 2.2 Preparation of *N*-acyl amides **1a-S1-5**

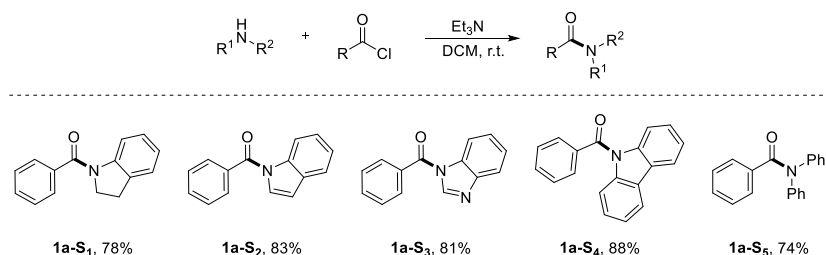

These amides **1a-S1-5** were prepared from acyl chloride and the corresponding amines by our previously reported procedure.<sup>3</sup>

## 2.3 Preparation of nitro compound **2p**

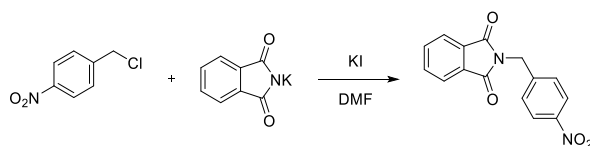

**2-(4-Nitrobenzyl)isoindoline-1,3-dione (2p)**.<sup>1</sup> A solution of *p*-nitrobenzyl chloride (2.0 g, 11.7 mmol), potassium phthalimide (2.4 g, 12.8 mmol), KI (0.2 g, 1.2 mmol) in DMF (50 mL) were stirred at room temperature for 1 h. Then water (10 mL) was added and the resultant mixture was extracted with EtOAc (3 × 10 mL). The organic phase was dried over anhydrous Na<sub>2</sub>SO<sub>4</sub>. The crude product was purified by flash column chromatography (petroleum ether/ethyl acetate = 7/1) as an eluent to afford the title compound as a white solid (2.4 g, 61%).

## 2.4 Preparation of Intermediate **6a**

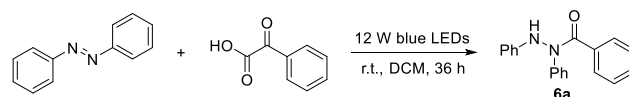

*N,N'*-diphenylbenzohydrazide (**6a**) was synthesized by the literature procedure.<sup>4</sup>

To a 50 mL round flask were charged with azobenzene (0.5 g, 2.74 mmol), benzoylformic acid (0.42 g, 2.74 mmol) and CH<sub>2</sub>Cl<sub>2</sub> (25.0 mL). The mixture was then stirred at room temperature under the irradiated of 30 W LED light source (390–395 nm) for 36 h. Upon completion (monitored by TLC), the reaction mixture was concentrated under vacuum and the residue was purified by column chromatography (Petroleum ether/ethyl acetate = 5:1) to give the desired product **6a** (0.61 g, 76%) as a white solid.

### 3. Studies on the FeCl<sub>3</sub>-Catalyzed Reductive Transamidation

#### 3.1 General Procedure

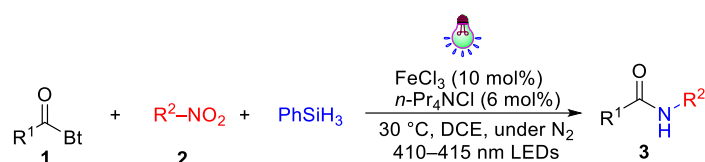

To an oven-dried Schlenk tube was sequentially charged with FeCl<sub>3</sub> (6.5 mg, 0.04 mmol), *n*-Pr<sub>4</sub>NCl (5.3 mg, 0.024 mmol), *N*-acyl benzotriazole (0.4 mmol) under N<sub>2</sub>. Then the Schlenk tube was capped with a rubber septum before connecting to Schlenk line. After three vacuum and backfill cycles, DCE (2 mL) was added with an injector. Then PhSiH<sub>3</sub> (123.4 μL, 1.0 mmol) and nitro compounds (0.8 mmol) were added through microsyringes. The perimeter of the septum was carefully sealed with parafilm. Then the mixture was allowed for stirring at 30 °C and irradiated by 410–415 nm LEDs for the specified time. After the reaction was finished, the solvent was removed by a rotary evaporator and the crude product was purified by flash column chromatography (Petroleum Ether/Ethyl Acetate).

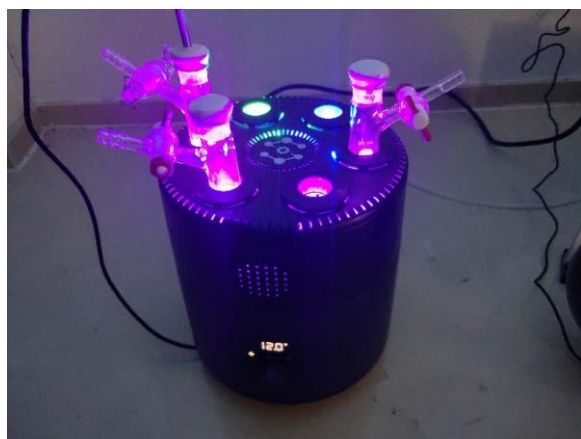

**Figure S1.** Photo of the reaction set-up ( $\lambda = 410\text{--}415\text{ nm}$ ).

**Note:** We used RLH-AL1 Photo-reactor, manufactured by Shanghai Shanshi technology Co. Ltd., which was equipped with six tunable (0–12 W) 365–750 nm LED light sources.

**Table S1. Detailed screening of the reaction conditions.<sup>a</sup>**

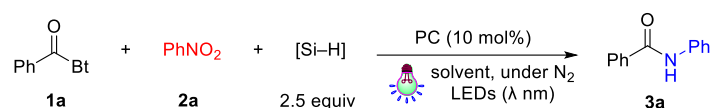

| entry | Photocatalyst                        | Additives                                                       | [Si-H]                               | Solvent           | $\lambda$ (nm) | Yield of <b>3a</b> <sup>b</sup> |
|-------|--------------------------------------|-----------------------------------------------------------------|--------------------------------------|-------------------|----------------|---------------------------------|
| 1     | FeCl <sub>3</sub>                    | no                                                              | PhSiH <sub>3</sub>                   | DCE               | 390–395        | 18                              |
| 2     | FeCl <sub>3</sub>                    | <i>n</i> -Bu <sub>4</sub> NF                                    | PhSiH <sub>3</sub>                   | DCE               | 390–395        | <b>69</b>                       |
| 3     | FeCl <sub>3</sub>                    | <i>n</i> -Bu <sub>4</sub> NF                                    | PhSiH <sub>3</sub>                   | DCM               | 390–395        | 65                              |
| 4     | FeCl <sub>3</sub>                    | <i>n</i> -Bu <sub>4</sub> NF                                    | PhSiH <sub>3</sub>                   | PhCl              | 390–395        | 46                              |
| 5     | FeCl <sub>3</sub>                    | <i>n</i> -Bu <sub>4</sub> NF                                    | PhSiH <sub>3</sub>                   | CHCl <sub>3</sub> | 390–395        | 48                              |
| 6     | FeCl <sub>3</sub>                    | <i>n</i> -Bu <sub>4</sub> NF                                    | PhSiH <sub>3</sub>                   | PhCF <sub>3</sub> | 390–395        | 32                              |
| 7     | FeCl <sub>3</sub>                    | <i>n</i> -Bu <sub>4</sub> NF                                    | PhSiH <sub>3</sub>                   | MeCN              | 390–395        | 61                              |
| 8     | FeCl <sub>3</sub>                    | <i>n</i> -Bu <sub>4</sub> NF                                    | PhSiH <sub>3</sub>                   | THF               | 390–395        | 41                              |
| 9     | FeCl <sub>3</sub>                    | <i>n</i> -Bu <sub>4</sub> NF                                    | PhSiH <sub>3</sub>                   | dioxane           | 390–395        | 44                              |
| 10    | FeCl <sub>3</sub>                    | <i>n</i> -Bu <sub>4</sub> NF                                    | PhSiH <sub>3</sub>                   | PhMe              | 390–395        | 16                              |
| 11    | FeCl <sub>3</sub>                    | <i>n</i> -Bu <sub>4</sub> NF                                    | PhSiH <sub>3</sub>                   | DMF               | 390–395        | 27                              |
| 12    | FeCl <sub>3</sub> ·6H <sub>2</sub> O | <i>n</i> -Bu <sub>4</sub> NF                                    | PhSiH <sub>3</sub>                   | DCE               | 390–395        | 48                              |
| 13    | FeBr <sub>3</sub>                    | <i>n</i> -Bu <sub>4</sub> NF                                    | PhSiH <sub>3</sub>                   | DCE               | 390–395        | 39                              |
| 14    | FeCl <sub>2</sub>                    | <i>n</i> -Bu <sub>4</sub> NF                                    | PhSiH <sub>3</sub>                   | DCE               | 390–395        | 42                              |
| 15    | FeCl <sub>3</sub>                    | <i>n</i> -Bu <sub>4</sub> NF                                    | (TMS) <sub>3</sub> SiH               | DCE               | 390–395        | 59                              |
| 16    | FeCl <sub>3</sub>                    | <i>n</i> -Bu <sub>4</sub> NF                                    | (EtO) <sub>3</sub> SiH               | DCE               | 390–395        | <5                              |
| 17    | FeCl <sub>3</sub>                    | <i>n</i> -Bu <sub>4</sub> NF                                    | (Me <sub>2</sub> SiH) <sub>2</sub> O | DCE               | 390–395        | 66                              |
| 18    | FeCl <sub>3</sub>                    | <i>n</i> -Bu <sub>4</sub> NF                                    | Et <sub>3</sub> SiH                  | DCE               | 390–395        | 32                              |
| 19    | FeCl <sub>3</sub>                    | <i>n</i> -Bu <sub>4</sub> NCl                                   | PhSiH <sub>3</sub>                   | DCE               | 390–395        | 81                              |
| 20    | FeCl <sub>3</sub>                    | <i>n</i> -Bu <sub>4</sub> NBr                                   | PhSiH <sub>3</sub>                   | DCE               | 390–395        | 65                              |
| 21    | FeCl <sub>3</sub>                    | <i>n</i> -Bu <sub>4</sub> NI                                    | PhSiH <sub>3</sub>                   | DCE               | 390–395        | 61                              |
| 22    | FeCl <sub>3</sub>                    | BnEt <sub>3</sub> NCl                                           | PhSiH <sub>3</sub>                   | DCE               | 390–395        | 87                              |
| 23    | FeCl <sub>3</sub>                    | ( <i>n</i> -C <sub>8</sub> H <sub>17</sub> ) <sub>3</sub> NMeCl | PhSiH <sub>3</sub>                   | DCE               | 390–395        | 55                              |
| 24    | FeCl <sub>3</sub>                    | Et <sub>4</sub> NCl                                             | PhSiH <sub>3</sub>                   | DCE               | 390–395        | 80                              |
| 25    | FeCl <sub>3</sub>                    | <i>n</i> -Pr <sub>4</sub> NCl                                   | PhSiH <sub>3</sub>                   | DCE               | 390–395        | 89                              |
| 26    | FeCl <sub>3</sub>                    | <i>n</i> -Pr <sub>4</sub> NCl                                   | PhSiH <sub>3</sub>                   | DCE               | 390–395        | 73 <sup>c</sup>                 |

|    |                                             |                                         |                    |                              |         |                 |
|----|---------------------------------------------|-----------------------------------------|--------------------|------------------------------|---------|-----------------|
| 27 | FeCl <sub>3</sub>                           | <i>n</i> -Pr <sub>4</sub> NCl           | PhSiH <sub>3</sub> | DCE                          | 390–395 | 92 <sup>d</sup> |
| 28 | FeCl <sub>3</sub>                           | <i>n</i> -Pr <sub>4</sub> NCl           | PhSiH <sub>3</sub> | DCE                          | 365–375 | 32              |
| 29 | FeCl <sub>3</sub>                           | <i>n</i> -Pr <sub>4</sub> NCl (6 mol%)  | PhSiH <sub>3</sub> | DCE                          | 410–415 | 99              |
| 30 | FeCl <sub>3</sub>                           | <i>n</i> -Pr <sub>4</sub> NCl (6 mol%)  | PhSiH <sub>3</sub> | DCE+1 equiv H <sub>2</sub> O | 410–415 | 65              |
| 31 | FeCl <sub>3</sub>                           | <i>n</i> -Pr <sub>4</sub> NCl (3 mol%)  | PhSiH <sub>3</sub> | DCE                          | 410–415 | 63              |
| 32 | FeCl <sub>3</sub>                           | <i>n</i> -Pr <sub>4</sub> NCl (10 mol%) | PhSiH <sub>3</sub> | DCE                          | 410–415 | 93              |
| 33 | FeCl <sub>3</sub>                           | LiCl                                    | PhSiH <sub>3</sub> | DCE                          | 410–415 | 45              |
| 34 | FeCl <sub>3</sub>                           | HCl                                     | PhSiH <sub>3</sub> | DCE                          | 410–415 | 99              |
| 35 | FeCl <sub>3</sub>                           | <i>n</i> -Pr <sub>4</sub> NCl           | PhSiH <sub>3</sub> | DCE                          | 450–455 | 44              |
| 36 | FeCl <sub>3</sub>                           | <i>n</i> -Pr <sub>4</sub> NCl           | PhSiH <sub>3</sub> | DCE                          | dark    | 0               |
| 37 | --                                          | <i>n</i> -Pr <sub>4</sub> NCl           | PhSiH <sub>3</sub> | DCE                          | 410–415 | 0               |
| 38 | FeCl <sub>3</sub>                           | <i>n</i> -Pr <sub>4</sub> NCl           | --                 | DCE                          | 410–415 | 24              |
| 39 | Ir(d'bpy)(bpy) <sub>2</sub> PF <sub>6</sub> | <i>n</i> -Pr <sub>4</sub> NCl           | PhSiH <sub>3</sub> | DCE                          | 410–415 | 14              |
| 40 | CuCl                                        | <i>n</i> -Pr <sub>4</sub> NCl           | PhSiH <sub>3</sub> | DCE                          | 410–415 | 41              |
| 41 | TBADT                                       | <i>n</i> -Pr <sub>4</sub> NCl           | PhSiH <sub>3</sub> | DCE                          | 410–415 | 58              |
| 42 | NiCl <sub>2</sub>                           | <i>n</i> -Pr <sub>4</sub> NCl           | PhSiH <sub>3</sub> | DCE                          | 410–415 | 13              |
| 43 | Ru(bpy) <sub>3</sub> Cl <sub>2</sub>        | <i>n</i> -Pr <sub>4</sub> NCl           | PhSiH <sub>3</sub> | DCE                          | 410–415 | 32              |

<sup>a</sup>Reaction conditions: **1a** (0.2 mmol), **2a** (2.0 equiv), additive (6 mol%), [Si–H] (2.5 equiv), DCE (2 mL), 12 h, under N<sub>2</sub>, irradiation by 12 W LEDs, 30 °C; <sup>b</sup>Isolated yield; <sup>c</sup>5 mol% of FeCl<sub>3</sub>; <sup>d</sup>20 mol% of FeCl<sub>3</sub>.

### 3.2 UV-VIS Study

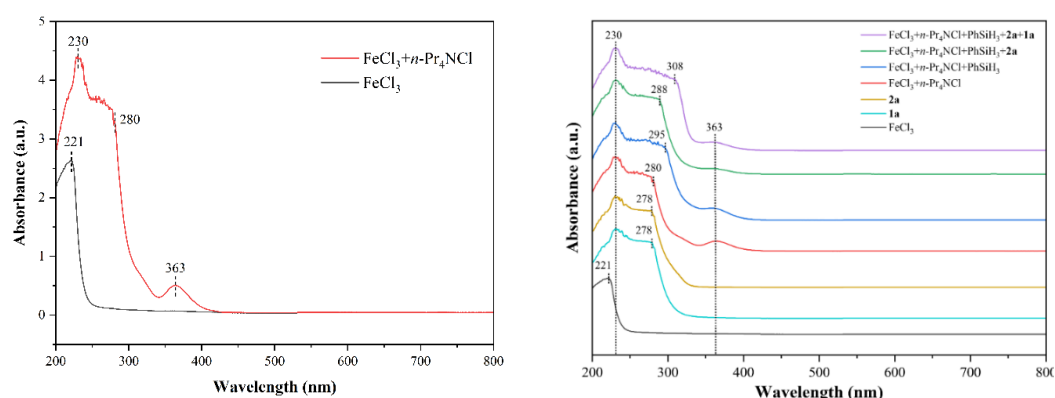

Figure S2 UV-vis absorbance spectra in DCE

| Entry | Stock solution                                    | Sample solution preparation for UV-Vis test                                                                                                                                   |
|-------|---------------------------------------------------|-------------------------------------------------------------------------------------------------------------------------------------------------------------------------------|
| 1     | FeCl <sub>3</sub><br>(75 μM in DCE)               | FeCl <sub>3</sub> (12.1 mg, 0.075 mmol) was dissolved in 1.0 mL of DCE. After stirring for 15 min, a 3.0 μL aliquot was drawn and added to 3.0 mL of DCE in a quartz cuvette. |
| 2     | <b>1a</b><br>(75 μM in DCE)                       | <b>1a</b> (19.7 mg, 0.075 mmol) was dissolved in 1.0 mL of DCE. After stirring for 15 min, a 3.0 μL aliquot was drawn and added to 3.0 mL of DCE in a quartz cuvette.         |
| 3     | <b>2a</b><br>(75 μM in DCE)                       | <b>2a</b> (16.7 mg, 0.075 mmol) was dissolved in 1.0 mL of DCE. After stirring for 15 min, a 3.0 μL aliquot was drawn and added to 3.0 mL of DCE in a quartz cuvette.         |
| 4     | FeCl <sub>3</sub> + <i>n</i> -Pr <sub>4</sub> NCl | FeCl <sub>3</sub> (12.1 mg, 0.075 mmol) and <i>n</i> -Pr <sub>4</sub> NCl (9.9 mg, 0.045 mmol) were dissolved in 1.0 mL of DCE. After stirring for 15                         |

|   |                                                                                        |                                                                                                                                                                                                                                                                                                                                                      |
|---|----------------------------------------------------------------------------------------|------------------------------------------------------------------------------------------------------------------------------------------------------------------------------------------------------------------------------------------------------------------------------------------------------------------------------------------------------|
|   |                                                                                        | min, a 3.0 $\mu$ L aliquot was drawn and added to 3.0 mL of DCE in a quartz cuvette.                                                                                                                                                                                                                                                                 |
| 5 | $\text{FeCl}_3 + n\text{-Pr}_4\text{NCl} + \text{PhSiH}_3$                             | $\text{FeCl}_3$ (12.1 mg, 0.075 mmol), $n\text{-Pr}_4\text{NCl}$ (9.9 mg, 0.045 mmol) and $\text{PhSiH}_3$ (202.9 mg, 1.88 mmol) was dissolved in 1.0 mL of DCE. After stirring for 15 min, a 3.0 $\mu$ L aliquot was drawn and added to 3.0 mL of DCE in a quartz cuvette.                                                                          |
| 6 | $\text{FeCl}_3 + n\text{-Pr}_4\text{NCl} + \text{PhSiH}_3 + \mathbf{2a}$               | $\text{FeCl}_3$ (12.1 mg, 0.075 mmol), $n\text{-Pr}_4\text{NCl}$ (9.9 mg, 0.045 mmol), $\text{PhSiH}_3$ (202.9 mg, 1.88 mmol) and $\mathbf{2a}$ (184.6 mg, 1.5 mmol) was dissolved in 1.0 mL of DCE. After stirring for 15 min, a 3.0 $\mu$ L aliquot was drawn and added to 3.0 mL of DCE in a quartz cuvette.                                      |
| 7 | $\text{FeCl}_3 + n\text{-Pr}_4\text{NCl} + \text{PhSiH}_3 + \mathbf{2a} + \mathbf{1a}$ | $\text{FeCl}_3$ (12.1 mg, 0.075 mmol), $n\text{-Pr}_4\text{NCl}$ (9.9 mg, 0.045 mmol), $\text{PhSiH}_3$ (202.9 mg, 1.88 mmol), $\mathbf{2a}$ (184.6 mg, 1.5 mmol) and $\mathbf{1a}$ (167.4 mg, 0.75 mmol) was dissolved in 1.0 mL of DCE. After stirring for 15 min, a 3.0 $\mu$ L aliquot was drawn and added to 3.0 mL of DCE in a quartz cuvette. |

### 3.4 Visible light irradiation on/off experiment

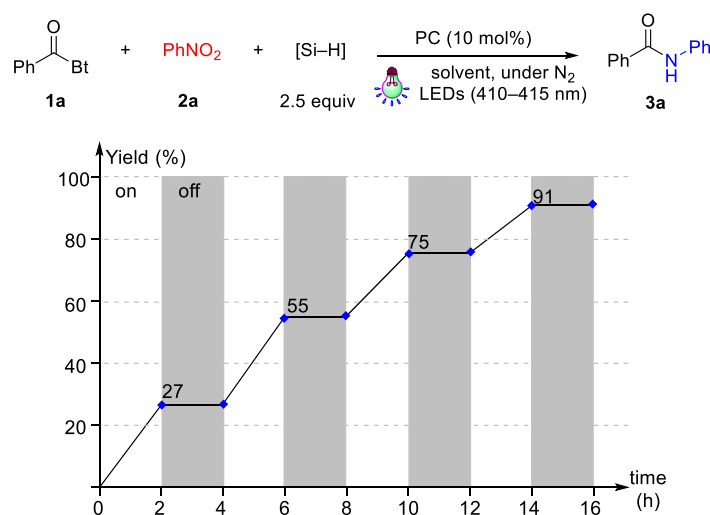

Figure 3. Visible light irradiation on/off experiment.

## 4. Characterization Data for the Products

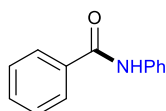

### *N*-Phenylbenzamide (**3a**)<sup>5</sup>

The compound was isolated as a white solid (78.1 mg, 99%) by flash column chromatography (petroleum ether/ethyl acetate = 10/1).  $^1\text{H NMR}$  (400 MHz, DMSO-



$d_6$ )  $\delta$  10.25 (s, 1H), 7.97 (d,  $J = 6.9$  Hz, 2H), 7.80 (d,  $J = 7.2$  Hz, 2H), 7.63 – 7.57 (m, 1H), 7.57 – 7.50 (m, 2H), 7.38 – 7.33 (m, 2H), 7.11 (t,  $J = 7.4$  Hz, 1H).  $^{13}\text{C}$  NMR (101 MHz, DMSO- $d_6$ )  $\delta$  165.6, 139.2, 135.0, 131.6, 128.6, 128.4, 127.7, 123.7, 120.4.

### Gram-scale synthesis of **3a** from **1a**

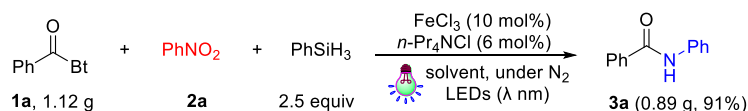

To an oven-dried Schlenk tube was sequentially charged with FeCl<sub>3</sub> (81.1 mg, 0.5 mmol), *n*-Pr<sub>4</sub>NCl (66.5 mg, 0.3 mmol), *N*-benzoyl benzotriazole **1a** (1.12 g, 5.0 mmol) under N<sub>2</sub>. Then the Schlenk tube was capped with a rubber septum before connecting to Schlenk line. After three vacuum and backfill cycles, DCE (5 mL) was added with an injector. Then PhSiH<sub>3</sub> (1.35 g, 12.5 mmol) and PhNO<sub>2</sub> (1.23 g, 10.0 mmol) were added through syringes. The perimeter of the septum was carefully sealed with parafilm. Then the mixture was allowed for stirring at 30 °C and irradiated by 410–415 nm LEDs for 24 h. After the reaction was finished, the crude product was purified by column chromatography (petroleum ether/ethyl acetate = 10/1) as an eluent to afford the title compound as a white solid (0.89 g, 91%).

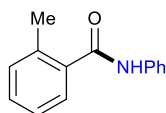

### 2-Methyl-*N*-phenylbenzamide (**3b**)<sup>6</sup>

The compound was isolated as a white solid (33.0 mg, 39%) by flash column chromatography (petroleum ether/ethyl acetate = 10/1).  $^1\text{H}$  NMR (500 MHz, DMSO- $d_6$ )  $\delta$  10.33 (s, 1H), 7.79 (d,  $J = 7.9$  Hz, 2H), 7.47 (d,  $J = 7.4$  Hz, 1H), 7.41 – 7.37 (m, 1H), 7.37 – 7.33 (m, 1H), 7.33 – 7.28 (m, 2H), 7.10 (t,  $J = 7.4$  Hz, 1H), 2.41 (s, 3H).  $^{13}\text{C}$  NMR (126 MHz, DMSO- $d_6$ )  $\delta$  167.9, 139.3, 137.3, 135.2, 130.5, 129.6, 128.7, 127.2, 125.6, 123.5, 119.7, 19.3.

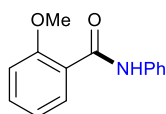

### 2-Methoxy-*N*-phenylbenzamide (3c)<sup>6</sup>

The compound was isolated as a white solid (38.2 mg, 42%) by flash column chromatography (petroleum ether/ethyl acetate = 10/1). <sup>1</sup>H NMR (400 MHz, CDCl<sub>3</sub>) δ 9.81 (s, 1H), 8.28 (d, *J* = 7.8 Hz, 1H), 7.69 (d, *J* = 8.4 Hz, 2H), 7.50 – 7.42 (m, 1H), 7.36 (t, *J* = 7.8 Hz, 2H), 7.15 – 7.07 (m, 2H), 6.99 (d, *J* = 8.3 Hz, 1H), 4.00 (s, 3H). <sup>13</sup>C NMR (101 MHz, CDCl<sub>3</sub>) δ 162.9, 156.8, 138.1, 132.9, 131.9, 128.6, 123.7, 121.3, 121.1, 120.0, 111.2, 55.8.

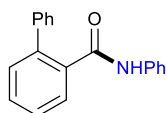

### *N*-Phenyl-[1,1'-biphenyl]-2-carboxamide (3d)<sup>3</sup>

The compound was isolated as a white solid (36.0 mg, 33%) by flash column chromatography (petroleum ether/ethyl acetate = 30/1). <sup>1</sup>H NMR (400 MHz, DMSO-*d*<sub>6</sub>) δ 10.24 (s, 1H), 7.60 – 7.50 (m, 4H), 7.47 (td, *J* = 8.1, 2.5 Hz, 4H), 7.37 (t, *J* = 7.4 Hz, 2H), 7.33 – 7.23 (m, 3H), 7.07 – 7.01 (m, 1H). <sup>13</sup>C NMR (101 MHz, DMSO-*d*<sub>6</sub>) δ 167.9, 140.1, 139.3, 139.2, 137.2, 130.0, 129.8, 128.6, 128.3, 128.3, 127.8, 127.3, 127.2.

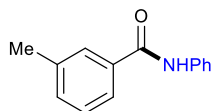

### 3-Methyl-*N*-phenylbenzamide (3e)<sup>6</sup>

The compound was isolated as a white solid (76.1 mg, 90%) by flash column chromatography (petroleum ether/ethyl acetate = 45/1). <sup>1</sup>H NMR (400 MHz, DMSO-*d*<sub>6</sub>) δ 10.21 (s, 1H), 7.82 – 7.72 (m, 4H), 7.45 – 7.38 (m, 2H), 7.38 – 7.31 (m, 2H), 7.10 (t, *J* = 7.4 Hz, 1H), 2.40 (s, 3H). <sup>13</sup>C NMR (101 MHz, CDCl<sub>3</sub>) δ 166.0, 138.6, 138.0, 134.9, 132.5, 129.0, 128.5, 127.8, 124.4, 123.9, 120.2, 21.3.

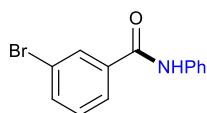

### 3-Bromo-*N*-phenylbenzamide (3f)<sup>7</sup>

The compound was isolated as a yellow solid (100.6 mg, 91%) by flash column

chromatography (petroleum ether/ethyl acetate = 15/1).  $^1\text{H NMR}$  (600 MHz,  $\text{DMSO-}d_6$ )  $\delta$  10.37 (s, 1H), 8.16 (t,  $J = 1.9$  Hz, 1H), 7.98 (d,  $J = 7.8$  Hz, 1H), 7.82 – 7.76 (m, 3H), 7.49 (t,  $J = 7.9$  Hz, 1H), 7.39 – 7.34 (m, 2H), 7.12 (t,  $J = 7.4$  Hz, 1H).  $^{13}\text{C NMR}$  (151 MHz,  $\text{DMSO-}d_6$ )  $\delta$  164.0, 138.9, 137.1, 134.2, 130.6, 130.3, 128.6, 126.9, 123.9, 121.7, 120.5.

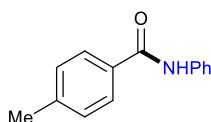

#### 4-Methyl-*N*-phenylbenzamide (3g)<sup>6</sup>

The compound was isolated as a white solid (70.9 mg, 84%) by flash column chromatography (petroleum ether/ethyl acetate = 45/1).  $^1\text{H NMR}$  (600 MHz,  $\text{DMSO-}d_6$ )  $\delta$  10.24 (s, 1H), 7.95 (d,  $J = 8.0$  Hz, 2H), 7.89 (d,  $J = 8.0$  Hz, 2H), 7.37 (t,  $J = 7.8$  Hz, 2H), 7.33 (d,  $J = 7.9$  Hz, 2H), 7.11 (t,  $J = 7.3$  Hz, 1H), 2.37 (s, 3H).  $^{13}\text{C NMR}$  (151 MHz,  $\text{DMSO-}d_6$ )  $\delta$  165.5, 141.5, 139.4, 132.2, 128.9, 128.6, 127.7, 123.5, 120.5, 21.0.

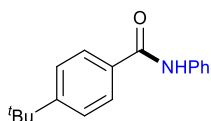

#### 4-(*tert*-Butyl)-*N*-phenylbenzamide (3h)<sup>6</sup>

The compound was isolated as a white solid (70.1 mg, 71%) by flash column chromatography (petroleum ether/ethyl acetate = 45/1).  $^1\text{H NMR}$  (400 MHz,  $\text{DMSO-}d_6$ )  $\delta$  10.19 (s, 1H), 7.91 (d,  $J = 8.4$  Hz, 2H), 7.81 (d,  $J = 8.8$  Hz, 1H), 7.54 (d,  $J = 8.3$  Hz, 2H), 7.35 (t,  $J = 7.7$  Hz, 2H), 7.09 (t,  $J = 7.2$  Hz, 1H), 1.32 (s, 9H).  $^{13}\text{C NMR}$  (101 MHz,  $\text{DMSO-}d_6$ )  $\delta$  165.5, 154.3, 139.3, 132.3, 128.5, 127.5, 125.1, 123.5, 120.3, 34.6, 30.9.

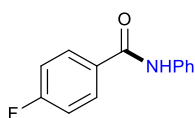

#### 4-Fluoro-*N*-phenylbenzamide (3i)<sup>6</sup>

The compound was isolated as a yellow solid (80.9 mg, 94%) by flash column

chromatography (petroleum ether/ethyl acetate = 8/1). **<sup>1</sup>H NMR** (600 MHz, DMSO-*d*<sub>6</sub>) δ 10.31 (s, 1H), 8.09 (dd, *J* = 8.6, 5.6 Hz, 2H), 7.84 (d, *J* = 8.1 Hz, 2H), 7.35 (q, *J* = 8.4 Hz, 4H), 7.11 (d, *J* = 7.3 Hz, 1H). **<sup>13</sup>C NMR** (101 MHz, DMSO-*d*<sub>6</sub>) δ 164.4, 164.0 (d, *J*<sub>C-F</sub> = 248.9 Hz, 139.1, 131.4 (d, *J*<sub>C-F</sub> = 3.0 Hz), 130.4 (d, *J*<sub>C-F</sub> = 9.1 Hz), 128.6, 123.7, 120.4, 115.3 (d, *J*<sub>C-F</sub> = 21.5 Hz). **<sup>19</sup>F NMR** (376 MHz, DMSO-*d*<sub>6</sub>) δ -108.85.

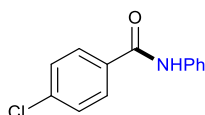

#### 4-Chloro-*N*-phenylbenzamide (3j)<sup>6</sup>

The compound was isolated as a yellow solid (88.1 mg, 95%) by flash column chromatography (petroleum ether/ethyl acetate = 10/1). **<sup>1</sup>H NMR** (600 MHz, DMSO-*d*<sub>6</sub>) δ 10.34 (s, 1H), 8.02 (d, *J* = 8.6 Hz, 2H), 7.82 (d, *J* = 8.0 Hz, 2H), 7.59 (d, *J* = 8.5 Hz, 2H), 7.39 – 7.30 (m, 2H), 7.11 (t, *J* = 7.5 Hz, 1H). **<sup>13</sup>C NMR** (101 MHz, DMSO-*d*<sub>6</sub>) δ 164.4, 139.0, 136.4, 133.7, 129.6, 128.6, 128.4, 123.8, 120.4.

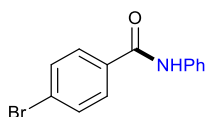

#### 4-Bromo-*N*-phenylbenzamide (3k)<sup>8</sup>

The compound was isolated as a yellow solid (104.9 mg, 95%) by flash column chromatography (petroleum ether/ethyl acetate = 10/1). **<sup>1</sup>H NMR** (400 MHz, DMSO-*d*<sub>6</sub>) δ 10.33 (s, 1H), 7.93 (d, *J* = 8.4 Hz, 2H), 7.80 (d, *J* = 8.9 Hz, 2H), 7.73 (d, *J* = 8.3 Hz, 2H), 7.36 (t, *J* = 7.8 Hz, 2H). **<sup>13</sup>C NMR** (126 MHz, DMSO-*d*<sub>6</sub>) δ 164.6, 139.0, 134.0, 131.4, 129.8, 128.7, 125.3, 123.9, 120.4.

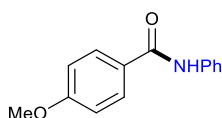

#### 4-Methoxy-*N*-phenylbenzamide (3l)<sup>6</sup>

The compound was isolated as a white solid (79.1 mg, 87%) by flash column chromatography (petroleum ether/ethyl acetate = 10/1). **<sup>1</sup>H NMR** (400 MHz, DMSO-*d*<sub>6</sub>) δ 10.13 (s, 1H), 8.00 (d, *J* = 8.8 Hz, 2H), 7.85 – 7.78 (m, 2H), 7.35 (t, *J* = 7.8 Hz,

2H), 7.13 – 7.03 (m, 3H), 3.83 (s, 3H).  $^{13}\text{C}$  NMR (101 MHz, DMSO- $d_6$ )  $\delta$  165.0, 161.9, 139.4, 129.6, 128.5, 127.1, 123.4, 120.4, 113.6, 55.4.

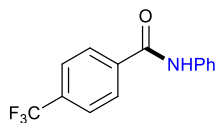

#### ***N*-Phenyl-4-(trifluoromethyl) benzamide (3m)<sup>9</sup>**

The compound was isolated as a yellow solid (102.9 mg, 97%) by flash column chromatography (petroleum ether/ethyl acetate = 10/1).  $^1\text{H}$  NMR (400 MHz, DMSO- $d_6$ )  $\delta$  10.47 (s, 1H), 8.15 (d,  $J$  = 8.1 Hz, 2H), 7.92 (d,  $J$  = 8.2 Hz, 2H), 7.78 (d,  $J$  = 7.4 Hz, 2H), 7.37 (t, 2H), 7.13 (t,  $J$  = 7.4 Hz, 1H).  $^{13}\text{C}$  NMR (101 MHz, DMSO- $d_6$ )  $\delta$  164.4, 138.8 (d,  $J_{\text{C-F}}$  = 4.4 Hz), 131.4 (q,  $J_{\text{C-F}}$  = 31.9 Hz), 128., 128.6, 125.4 (q,  $J_{\text{C-F}}$  = 3.7 Hz), 124.0, 122.6, 120.5.  $^{19}\text{F}$  NMR (376 MHz, DMSO- $d_6$ )  $\delta$  -61.36.

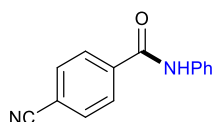

#### **4-Cyano-*N*-phenylbenzamide (3n)<sup>6</sup>**

The compound was isolated as a white solid (82.7 mg, 94%) by flash column chromatography (petroleum ether/ethyl acetate = 10/1).  $^1\text{H}$  NMR (400 MHz, DMSO- $d_6$ )  $\delta$  10.48 (s, 1H), 8.11 (d,  $J$  = 8.2 Hz, 2H), 8.02 (d,  $J$  = 8.3 Hz, 2H), 7.77 (d,  $J$  = 7.9 Hz, 2H), 7.37 (t,  $J$  = 7.9 Hz, 2H), 7.13 (t,  $J$  = 7.3 Hz, 1H).  $^{13}\text{C}$  NMR (101 MHz, DMSO- $d_6$ )  $\delta$  164.1, 139.0, 138.8, 132.4, 128.7, 128.5, 124.1, 120.5, 118.3, 113.9.

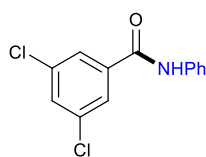

#### **3,5-Dichloro-*N*-phenylbenzamide (3o)<sup>10</sup>**

The compound was isolated as a white solid (93.7 mg, 88%) by flash column chromatography (petroleum ether/ethyl acetate = 30/1).  $^1\text{H}$  NMR (600 MHz, DMSO- $d_6$ )  $\delta$  10.41 (s, 1H), 7.99 (d,  $J$  = 2.1 Hz, 2H), 7.80 (d,  $J$  = 7.3 Hz, 2H), 7.74 (t,  $J$  = 1.8 Hz, 1H), 7.40 – 7.29 (m, 2H), 7.10 (d,  $J$  = 7.4 Hz, 1H).  $^{13}\text{C}$  NMR (151 MHz, CDCl<sub>3</sub>)  $\delta$

163.3, 137.8, 137.2, 135.6, 131.61, 129.1, 125.7, 125.2, 120.5.

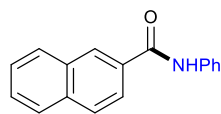

### ***N*-Phenyl-2-naphthamide (3p)<sup>3</sup>**

The compound was isolated as a yellow solid (93.9 mg, 95%) by flash column chromatography (petroleum ether/ethyl acetate = 8/1). <sup>1</sup>H NMR (400 MHz, DMSO-*d*<sub>6</sub>) δ 10.58 (s, 1H), 8.71 (s, 1H), 8.18 – 8.09 (m, 2H), 8.05 (d, *J* = 8.6 Hz, 1H), 7.99 (d, *J* = 7.6 Hz, 3H), 7.65–7.63 (m, 2H), 7.42 (t, *J* = 7.8 Hz, 2H), 7.15 (t, *J* = 7.3 Hz, 1H). <sup>13</sup>C NMR (101 MHz, DMSO-*d*<sub>6</sub>) δ 165.6, 139.2, 132.3, 132.1, 129.0, 128.6, 128.0, 128.0, 127.8, 127.7, 126.8, 124.5, 123.7, 120.4.

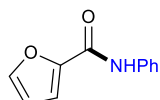

### ***N*-(Furan-2-yl)benzamide (3q)<sup>6</sup>**

The compound was isolated as a yellow solid (66.7 mg, 89%) by flash column chromatography (petroleum ether/ethyl acetate = 7/1). <sup>1</sup>H NMR (400 MHz, CDCl<sub>3</sub>) δ 8.22 (s, 1H), 7.67 (d, *J* = 8.7 Hz, 2H), 7.47 (d, *J* = 2.0 Hz, 1H), 7.38 – 7.30 (m, 2H), 7.22 (dd, *J* = 3.3, 0.8 Hz, 1H), 7.17 – 7.09 (m, 1H), 6.54 – 6.49 (m, 1H). <sup>13</sup>C NMR (101 MHz, CDCl<sub>3</sub>) δ 156.1, 147.7, 144.1, 137.3, 129.0, 124.4, 119.9, 115.1, 112.5.

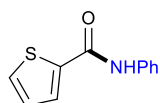

### ***N*-Phenylthiophene-2-carboxamide (3r)<sup>6</sup>**

The compound was isolated as a yellow solid (62.6 mg, 77%) by flash column chromatography (petroleum ether/ethyl acetate = 15/1). <sup>1</sup>H NMR (400 MHz, DMSO-*d*<sub>6</sub>) δ 10.25 (s, 1H), 8.10 – 8.02 (m, 1H), 7.83 (dd, *J* = 5.0, 1.1 Hz, 1H), 7.81 – 7.69 (m, 2H), 7.40 – 7.32 (m, 2H), 7.22 (dd, *J* = 5.0, 3.7 Hz, 1H), 7.10 (t, *J* = 7.3 Hz, 1H). <sup>13</sup>C NMR (101 MHz, DMSO-*d*<sub>6</sub>) δ 159.9, 138.7, 131.8, 129.1, 128.7, 128.0, 123.7, 120.4.

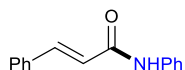

### ***N*-Phenylcinnamamide (3s)<sup>1</sup>**

The compound was isolated as a white solid (41.9 mg, 47%) by flash column chromatography (petroleum ether/ethyl acetate = 10/1). <sup>1</sup>H NMR (400 MHz, CDCl<sub>3</sub>) δ 7.77 (s, 1H), 7.71 – 7.60 (m, 3H), 7.54 – 7.44 (m, 2H), 7.40 – 7.29 (m, 5H), 7.13 (t, *J* = 7.4 Hz, 1H), 6.59 (d, *J* = 15.5 Hz, 1H). <sup>13</sup>C NMR (101 MHz, CDCl<sub>3</sub>) δ 164.7, 142.1, 138.1, 134.5, 129.8, 128.9, 128.7, 127.9, 124.4, 121.1, 120.3.

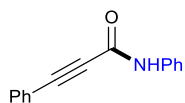

### ***N*,3-Diphenylpropiolamide (3t)<sup>11</sup>**

The compound was isolated as a white solid (59.3 mg, 67%) by flash column chromatography (petroleum ether/ethyl acetate = 10/1). <sup>1</sup>H NMR (400 MHz, DMSO-*d*<sub>6</sub>) δ 10.86 (s, 1H), 7.74 – 7.59 (m, 4H), 7.59 – 7.46 (m, 3H), 7.34 (t, *J* = 7.9 Hz, 2H), 7.12 (t, *J* = 7.2 Hz, 1H). <sup>13</sup>C NMR (101 MHz, DMSO-*d*<sub>6</sub>) δ 150.3, 138.5, 132.2, 130.5, 129.0, 128.8, 124.1, 119.7, 119.6, 84.4, 84.3.

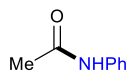

### ***N*-Phenylacetamide (3u)<sup>5</sup>**

The compound was isolated as a white solid (54.0 mg, 96%) by flash column chromatography (petroleum ether/ethyl acetate = 3/1). <sup>1</sup>H NMR (400 MHz, DMSO-*d*<sub>6</sub>) δ 9.90 (s, 1H), 7.57 (d, *J* = 7.3 Hz, 2H), 7.32 – 7.10 (m, 2H), 7.01 (t, *J* = 7.4 Hz, 1H), 2.03 (s, 3H). <sup>13</sup>C NMR (101 MHz, DMSO-*d*<sub>6</sub>) δ 168.3, 139.4, 128.7, 123.0, 119.1, 24.0.

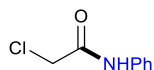

### **2-Chloro-*N*-phenylacetamide (3v)<sup>12</sup>**

The compound was isolated as a white solid (64.4 mg, 95%) by flash column chromatography (petroleum ether/ethyl acetate = 5/1). <sup>1</sup>H NMR (400 MHz, DMSO-*d*<sub>6</sub>) δ 10.30 (s, 1H), 7.69 – 7.56 (m, 2H), 7.45 – 7.28 (m, 2H), 7.08 (t, *J* = 7.4 Hz, 1H), 4.26

(s, 2H).  $^{13}\text{C}$  NMR (101 MHz, DMSO- $d_6$ )  $\delta$  164.6, 138.5, 128.8, 123.8, 119.4, 43.6.

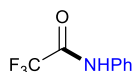

### 2,2,2-Trifluoro-*N*-phenylacetamide (**3w**)<sup>5</sup>

The compound was isolated as a yellow solid (28.4 mg, 38%) by flash column chromatography (petroleum ether/ethyl acetate = 60/1).  $^1\text{H}$  NMR (400 MHz, DMSO- $d_6$ )  $\delta$  11.24 (s, 1H), 7.67 (dd,  $J$  = 8.7, 1.2 Hz, 2H), 7.45 – 7.36 (m, 2H), 7.28 – 7.18 (m, 1H).  $^{13}\text{C}$  NMR (101 MHz, DMSO- $d_6$ )  $\delta$  154.5 (d,  $J_{\text{C-F}}$  = 37.0 Hz), 136.3, 129.0, 125.64, 121.1, 115.8 (d,  $J_{\text{C-F}}$  = 288.8 Hz).  $^{19}\text{F}$  NMR (376 MHz, DMSO- $d_6$ )  $\delta$  -73.94.

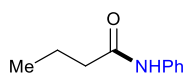

### *N*-Phenylbutyramide (**3x**)<sup>6</sup>

The compound was isolated as a white solid (47.7 mg, 73%) by flash column chromatography (petroleum ether/ethyl acetate = 5/1).  $^1\text{H}$  NMR (400 MHz, DMSO- $d_6$ )  $\delta$  9.83 (s, 1H), 7.58 (d,  $J$  = 5.5 Hz, 2H), 7.27 (d,  $J$  = 8.5 Hz, 2H), 7.03 – 6.97 (m, 1H), 2.27 (t,  $J$  = 7.3 Hz, 2H), 1.60 (h,  $J$  = 7.4 Hz, 2H), 0.90 (t,  $J$  = 7.4 Hz, 3H).  $^{13}\text{C}$  NMR (101 MHz, DMSO- $d_6$ )  $\delta$  171.1, 139.3, 128.6, 122.9, 119.0, 38.3, 18.6, 13.6.

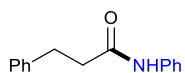

### *N*,3-Diphenylpropanamide (**3y**)<sup>13</sup>

The compound was isolated as a yellow solid (84.1 mg, 93%) by flash column chromatography (petroleum ether/ethyl acetate = 10/1).  $^1\text{H}$  NMR (400 MHz, CDCl<sub>3</sub>)  $\delta$  7.68 (s, 1H), 7.37 (d,  $J$  = 7.6 Hz, 2H), 7.18 (d,  $J$  = 4.4 Hz, 4H), 7.10 (d,  $J$  = 7.4 Hz, 2H), 7.00 (t,  $J$  = 7.4 Hz, 1H), 2.93 (t,  $J$  = 7.8 Hz, 2H), 2.55 (t,  $J$  = 7.8 Hz, 2H).  $^{13}\text{C}$  NMR (101 MHz, CDCl<sub>3</sub>)  $\delta$  170.8, 140.5, 137.7, 128.8, 128.5, 128.3, 126.2, 124.2, 120.1, 39.1, 31.5.



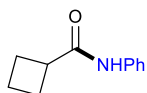

### ***N*-Phenylcyclobutanecarboxamide (3z)<sup>3</sup>**

The compound was isolated as a yellow solid (64.5 mg, 92%) by flash column chromatography (petroleum ether/ethyl acetate = 40/1). <sup>1</sup>H NMR (600 MHz, DMSO-*d*<sub>6</sub>) δ 9.72 (s, 1H), 7.65 (d, *J* = 8.5 Hz, 2H), 7.42 – 7.20 (m, 2H), 7.00 (t, *J* = 7.4 Hz, 1H), 3.24 (p, *J* = 8.4 Hz, 1H), 2.25 (dq, *J* = 11.6, 9.1 Hz, 2H), 2.14 – 2.06 (m, 2H), 1.98 – 1.87 (m, 1H), 1.81 (td, *J* = 11.4, 9.3, 5.0 Hz, 1H). <sup>13</sup>C NMR (101 MHz, DMSO-*d*<sub>6</sub>) δ 172.8, 139.4, 128.6, 122.9, 119.1, 24.6, 17.7.

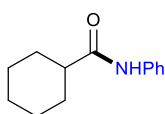

### ***N*-Phenylcyclohexanecarboxamide (3za)<sup>6</sup>**

The compound was isolated as a yellow solid (77.3 mg, 95%) by flash column chromatography (petroleum ether/ethyl acetate = 45/1). <sup>1</sup>H NMR (400 MHz, DMSO-*d*<sub>6</sub>) δ 9.78 (s, 1H), 7.60 (d, *J* = 7.7 Hz, 2H), 7.26 (t, *J* = 7.9 Hz, 2H), 7.00 (t, *J* = 7.4 Hz, 1H), 2.32 (t, *J* = 11.5 Hz, 1H), 1.77 (t, *J* = 14.9 Hz, 4H), 1.65 (d, *J* = 9.9 Hz, 1H), 1.40 (q, *J* = 11.0, 9.6 Hz, 2H), 1.33 – 1.10 (m, 3H). <sup>13</sup>C NMR (101 MHz, DMSO-*d*<sub>6</sub>) δ 174.3, 139.5, 128.6, 122.8, 119.0, 44.9, 29.1, 25.4, 25.2.

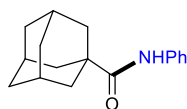

### ***N*-Phenyladamantane-1-carboxamide (3zb)<sup>3</sup>**

The compound was isolated as a white solid (35.3 mg, 35%) by flash column chromatography (petroleum ether/ethyl acetate = 10/1). <sup>1</sup>H NMR (400 MHz, DMSO-*d*<sub>6</sub>) δ 9.09 (s, 1H), 7.68 – 7.59 (m, 2H), 7.30 – 7.24 (m, 2H), 7.04 – 6.99 (m, 1H), 2.02 (d, *J* = 6.4 Hz, 2H), 1.90 (d, *J* = 2.9 Hz, 6H), 1.71 (d, *J* = 3.1 Hz, 6H). <sup>13</sup>C NMR (101 MHz, DMSO-*d*<sub>6</sub>) δ 175.9, 139.3, 128.3, 123.1, 120.2, 40.9, 38.3, 36.0, 27.7.

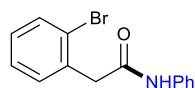

### 2-(2-Bromophenyl)-*N*-phenylacetamide (3zc)<sup>3</sup>

The compound was isolated as a white solid (81.2 mg, 70%) by flash column chromatography (petroleum ether/ethyl acetate = 10/1). **<sup>1</sup>H NMR** (400 MHz, CDCl<sub>3</sub>) δ 7.62 (dd, *J* = 8.0, 1.2 Hz, 1H), 7.48 – 7.44 (m, 2H), 7.43 – 7.40 (m, 1H), 7.36 – 7.31 (m, 2H), 7.29 (t, *J* = 7.9 Hz, 2H), 7.22 – 7.17 (m, 1H), 7.09 (t, *J* = 7.3 Hz, 1H), 3.86 (s, 2H). **<sup>13</sup>C NMR** (101 MHz, CDCl<sub>3</sub>) δ 168.0, 137.6, 134.5, 133.0, 131.7, 129.1, 128.8, 127.9, 124.9, 124.3, 120.1, 44.6.

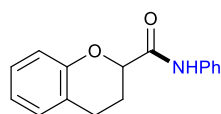

### *N*-Phenylchromane-2-carboxamide (3zd)<sup>14</sup>

The compound was isolated as a white solid (84.9 mg, 84%) by flash column chromatography (petroleum ether/ethyl acetate = 10/1). **<sup>1</sup>H NMR** (400 MHz, DMSO-*d*<sub>6</sub>) δ 9.97 (s, 1H), 7.71 (d, *J* = 7.9 Hz, 2H), 7.33 (t, *J* = 7.7 Hz, 2H), 7.16 – 7.06 (m, 3H), 6.95 (d, *J* = 8.1 Hz, 1H), 6.87 (t, *J* = 7.3 Hz, 1H), 4.76 – 4.71 (m, 1H), 2.92 – 2.81 (m, 1H), 2.80 – 2.70 (m, 1H), 2.28 – 2.21 (m, 1H), 2.11 – 2.00 (m, 1H). **<sup>13</sup>C NMR** (101 MHz, DMSO-*d*<sub>6</sub>) δ 168.7, 153.4, 138.4, 129.5, 128.6, 127.2, 123.8, 121.9, 120.5, 112.0, 116.6, 75.0, 24.4, 23.2.

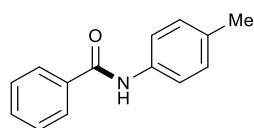

### *N*-(*p*-Tolyl)-benzamide (4a)<sup>6</sup>

The compound was isolated as a yellow solid (75.2 mg, 89%) by flash column chromatography (petroleum ether/ethyl acetate = 10/1). **<sup>1</sup>H NMR** (400 MHz, DMSO-*d*<sub>6</sub>) δ 10.18 (s, 1H), 7.94 (d, *J* = 6.9 Hz, 2H), 7.65 (d, *J* = 8.4 Hz, 2H), 7.59 – 7.49 (m, 3H), 7.15 (d, *J* = 8.3 Hz, 2H), 2.28 (s, 3H). **<sup>13</sup>C NMR** (101 MHz, DMSO-*d*<sub>6</sub>) δ 165.3, 136.7, 135.1, 132.6, 131.4, 129.0, 128.3, 127.6, 120.4, 20.5.

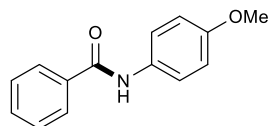

***N*-(*p*-Methoxy)-benzamide (4b)<sup>3</sup>**

The compound was isolated as a white solid (82.7 mg, 91%) by flash column chromatography (petroleum ether/ethyl acetate = 5/1). <sup>1</sup>H NMR (400 MHz, DMSO-*d*<sub>6</sub>) δ 10.11 (s, 1H), 7.94 (d, *J* = 6.8 Hz, 2H), 7.68 (d, *J* = 9.0 Hz, 2H), 7.60 – 7.49 (m, 3H), 6.93 (d, *J* = 9.0 Hz, 2H), 3.75 (s, 3H). <sup>13</sup>C NMR (101 MHz, DMSO-*d*<sub>6</sub>) δ 165.1, 155.6, 135.1, 132.3, 131.4, 128.3, 127.6, 122.0, 113.7, 55.2.

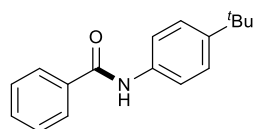

***N*-(4-(*tert*-Butyl)phenyl)benzamide (4c)<sup>6</sup>**

The compound was isolated as a white solid (88.2 mg, 87%) by flash column chromatography (petroleum ether/ethyl acetate = 5/1). <sup>1</sup>H NMR (400 MHz, DMSO-*d*<sub>6</sub>) δ 10.18 (s, 1H), 8.00 – 7.92 (m, 2H), 7.74 – 7.68 (m, 2H), 7.63 – 7.47 (m, 4H), 7.39 – 7.33 (m, 2H), 1.28 (s, 9H). <sup>13</sup>C NMR (101 MHz, DMSO-*d*<sub>6</sub>) δ 165.3, 146.0, 136.6, 135.0, 131.4, 128.3, 127.6, 125.2, 120.1, 34.0, 31.2.

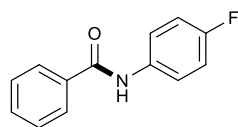

***N*-(4-Fluorophenyl)benzamide (4d)<sup>6</sup>**

The compound was isolated as a white solid (75.8 mg, 88%) by flash column chromatography (petroleum ether/ethyl acetate = 10/1). <sup>1</sup>H NMR (400 MHz, DMSO-*d*<sub>6</sub>) δ 10.31 (s, 1H), 7.95 (d, *J* = 7.2 Hz, 2H), 7.85 – 7.73 (m, 2H), 7.62 – 7.50 (m, 3H), 7.19 (t, *J* = 8.6 Hz, 2H). <sup>13</sup>C NMR (101 MHz, DMSO-*d*<sub>6</sub>) δ 165.5, 158.4 (d, *J*<sub>C-F</sub> = 240.3 Hz), 135.6, 134.9, 131.6, 128.4, 127.7, 122.2 (d, *J*<sub>C-F</sub> = 7.8 Hz), 115.2 (d, *J*<sub>C-F</sub> = 22.2 Hz). <sup>19</sup>F NMR (376 MHz, DMSO-*d*<sub>6</sub>) δ -118.83.

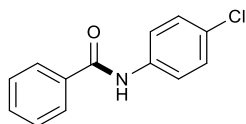

***N*-(4-Chlorophenyl)-2-(trifluoromethyl)benzamide (4e)**<sup>8</sup>

The compound was isolated as a white solid (85.3 mg, 92%) by flash column chromatography (petroleum ether/ethyl acetate = 10/1). **<sup>1</sup>H NMR** (600 MHz, DMSO-*d*<sub>6</sub>) δ 10.41 (s, 1H), 7.98 (d, *J* = 9.0 Hz, 2H), 7.87 (d, *J* = 8.8 Hz, 2H), 7.59 (d, *J* = 7.4 Hz, 1H), 7.53 (t, *J* = 7.5 Hz, 2H), 7.41 (d, *J* = 8.8 Hz, 2H). **<sup>13</sup>C NMR** (101 MHz, DMSO-*d*<sub>6</sub>) δ 165.6, 138.2, 134.7, 131.7, 128.5, 128.4, 127.7, 127.3.

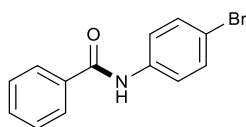

***N*-(4-Bromophenyl)benzamide (4f)**<sup>8</sup>

The compound was isolated as a yellow solid (96.1 mg, 87%) by flash column chromatography (petroleum ether/ethyl acetate = 10/1). **<sup>1</sup>H NMR** (400 MHz, DMSO-*d*<sub>6</sub>) δ 10.37 (s, 1H), 8.05 – 7.91 (m, 2H), 7.81 – 7.72 (m, 2H), 7.60 (t, *J* = 7.3 Hz, 1H), 7.58 – 7.49 (m, 4H). **<sup>13</sup>C NMR** (101 MHz, DMSO-*d*<sub>6</sub>) δ 165.7, 138.6, 134.7, 131.7, 131.4, 128.4, 127.7, 122.2, 115.3.

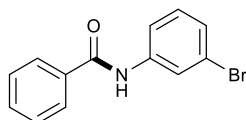

***N*-(*m*-Bromo)benzamide (4g)**<sup>3</sup>

The compound was isolated as a yellow solid (100.1 mg, 91%) by flash column chromatography (petroleum ether/ethyl acetate = 10/1). **<sup>1</sup>H NMR** (400 MHz, CDCl<sub>3</sub>) δ 7.88 (s, 1H), 7.80 (t, *J* = 2.0 Hz, 1H), 7.76 – 7.72 (m, 1H), 7.45 (td, *J* = 6.2, 5.2, 2.6 Hz, 2H), 7.36 (t, *J* = 7.5 Hz, 2H), 7.17 (d, *J* = 8.1 Hz, 1H), 7.11 (t, *J* = 8.0 Hz, 1H). **<sup>13</sup>C NMR** (101 MHz, CDCl<sub>3</sub>) δ 166.1, 139.2, 134.3, 132.0, 130.2, 128.7, 127.4, 127.1, 123.3, 122.5, 118.9.

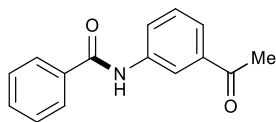

### ***N*-(3-Acetylphenyl)benzamide (4h)<sup>3</sup>**

The compound was isolated as a white solid (86.2 mg, 89%) by flash column chromatography (petroleum ether/ethyl acetate = 5/1). <sup>1</sup>H NMR (400 MHz, DMSO-*d*<sub>6</sub>) δ 10.46 (s, 1H), 8.40 (s, 1H), 8.10 (dd, *J* = 8.0, 2.1 Hz, 1H), 8.00 (dd, *J* = 7.5, 2.3 Hz, 2H), 7.72 (d, *J* = 6.4 Hz, 1H), 7.64 – 7.48 (m, 4H), 2.59 (s, 3H). <sup>13</sup>C NMR (101 MHz, DMSO-*d*<sub>6</sub>) δ 197.7, 165.7, 139.6, 137.3, 134.6, 131.8, 129.0, 128.4, 127.7, 124.8, 123.6, 119.7, 26.8.

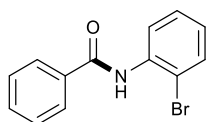

### ***N*-(2-Bromophenyl)benzamide (4i)<sup>8</sup>**

The compound was isolated as a yellow solid (68.5 mg, 62%) by flash column chromatography (petroleum ether/ethyl acetate = 30/1). <sup>1</sup>H NMR (500 MHz, CDCl<sub>3</sub>) δ 8.56 (dd, *J* = 8.3, 1.4 Hz, 1H), 8.48 (s, 1H), 7.97 – 7.88 (m, 2H), 7.61 – 7.55 (m, 2H), 7.55 – 7.48 (m, 2H), 7.37 (td, *J* = 8.5, 8.0, 1.5 Hz, 1H), 7.01 (td, *J* = 7.7, 1.6 Hz, 1H). <sup>13</sup>C NMR (126 MHz, CDCl<sub>3</sub>) δ 165.2, 135.8, 134.5, 132.2, 132.1, 128.9, 128.5, 127.0, 125.2, 121.7, 113.7.

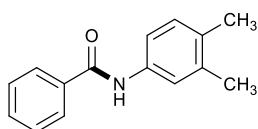

### ***N*-(3,4-Dimethylphenyl)benzamide (4j)<sup>15</sup>**

The compound was isolated as a white solid (76.6 mg, 85%) by flash column chromatography (petroleum ether/ethyl acetate = 50/1). <sup>1</sup>H NMR (600 MHz, DMSO-*d*<sub>6</sub>) δ 10.18 (s, 1H), 8.06 – 7.96 (m, 2H), 7.65 (d, *J* = 2.3 Hz, 1H), 7.62 – 7.56 (m, 2H), 7.52 (t, *J* = 7.4 Hz, 2H), 7.11 (d, *J* = 8.2 Hz, 1H), 2.23 (s, 3H), 2.20 (s, 3H). <sup>13</sup>C NMR (151 MHz, DMSO-*d*<sub>6</sub>) δ 165.3, 137.0, 136.1, 135.2, 131.4, 131.3, 129.5, 128.3, 127.6, 121.7, 118.0, 19.6, 18.8.

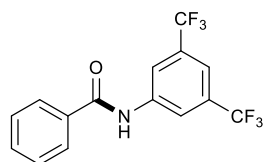

***N*-(3,5-Bis(trifluoromethyl)phenyl)benzamide (4k)<sup>10</sup>**

The compound was isolated as a white solid (126.6 mg, 95%) by flash column chromatography (petroleum ether/ethyl acetate = 200/1). <sup>1</sup>H NMR (600 MHz, DMSO-*d*<sub>6</sub>) δ 10.80 (s, 1H), 8.53 (s, 2H), 8.00 (d, *J* = 7.2 Hz, 2H), 7.69 (s, 1H), 7.59 (t, *J* = 7.4 Hz, 1H), 7.52 (t, *J* = 7.6 Hz, 2H). <sup>13</sup>C NMR (126 MHz, DMSO-*d*<sub>6</sub>) δ 166.2, 141.1, 133.86, 132.3, 130.7 (q, *J*<sub>C-F</sub> = 32.7 Hz), 128.6, 127.79, 123.3 (d, *J*<sub>C-F</sub> = 273.0 Hz), 119.9 (d, *J*<sub>C-F</sub> = 4.0 Hz), 116.4. <sup>19</sup>F NMR (376 MHz, CDCl<sub>3</sub>) δ -62.99.

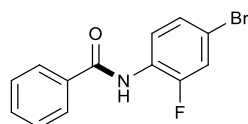

***N*-(4-Bromo-2-fluorophenyl)benzamide (4l)<sup>3</sup>**

The compound was isolated as a white solid (95.3 mg, 81%) by flash column chromatography (petroleum ether/ethyl acetate = 150/1). <sup>1</sup>H NMR (600 MHz, DMSO-*d*<sub>6</sub>) δ 10.23 (s, 1H), 8.02 (d, *J* = 7.9 Hz, 2H), 7.69 – 7.55 (m, 2H), 7.53 (t, *J* = 7.6 Hz, 2H), 7.44 (dd, *J* = 8.7, 2.2 Hz, 1H). <sup>13</sup>C NMR (101 MHz, CDCl<sub>3</sub>) δ 165.3, 152.3 (d, *J*<sub>C-F</sub> = 247.4 Hz), 134.2, 132.3, 129.0, 127.9 (d, *J*<sub>C-F</sub> = 3.7 Hz), 127.1, 125.8 (d, *J*<sub>C-F</sub> = 10.0 Hz), 122.7 (d, *J*<sub>C-F</sub> = 1.6 Hz), 118.4 (d, *J*<sub>C-F</sub> = 22.5 Hz), 115.9 (d, *J*<sub>C-F</sub> = 9.4 Hz). <sup>19</sup>F NMR (376 MHz, CDCl<sub>3</sub>) δ -128.60.

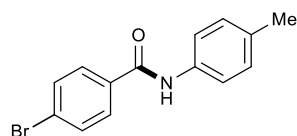

**4-Bromo-*N*-(*p*-tolyl)benzamide (4m)<sup>16</sup>**

The compound was isolated as a white solid (69.6 mg, 60%) by flash column chromatography (petroleum ether/ethyl acetate = 20/1). <sup>1</sup>H NMR (600 MHz, DMSO-*d*<sub>6</sub>) δ 10.24 (s, 1H), 7.91 (d, *J* = 8.5 Hz, 2H), 7.72 (d, *J* = 8.4 Hz, 2H), 7.66 (d, *J* = 8.2

Hz, 2H), 7.15 (d,  $J = 8.2$  Hz, 2H), 2.27 (s, 3H).  $^{13}\text{C}$  NMR (101 MHz, DMSO- $d_6$ )  $\delta$  164.3, 136.41, 134.1, 132.8, 131.4, 129.8, 129.0, 125.2, 120.4, 20.5.

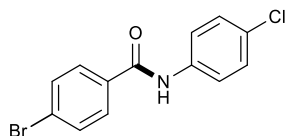

#### 4-Bromo-*N*-(4-chlorophenyl)benzamide (4n)<sup>17</sup>

The compound was isolated as a white solid (87.2 mg, 70%) by flash column chromatography (petroleum ether/ethyl acetate = 40/1).  $^1\text{H}$  NMR (400 MHz, DMSO- $d_6$ )  $\delta$  10.44 (s, 1H), 7.93 – 7.88 (m, 2H), 7.84 – 7.72 (m, 4H), 7.42 (dd, 2H).  $^{13}\text{C}$  NMR (101 MHz, DMSO- $d_6$ )  $\delta$  164.6, 139.0, 133.7, 131.5, 129.8, 128.6, 127.4, 125.5, 121.9.

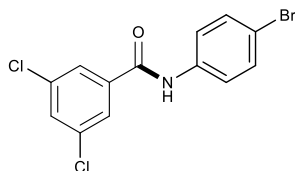

#### *N*-(4-Bromophenyl)-3,5-dichloro benzamide (4o)

The compound was isolated as a white solid (85.0 mg, 62%) by flash column chromatography (petroleum ether/ethyl acetate = 40/1).  $^1\text{H}$  NMR (400 MHz, DMSO- $d_6$ )  $\delta$  10.50 (s, 1H), 7.96 (s, 1H), 7.88 – 7.71 (m, 3H), 7.53 (d,  $J = 8.4$  Hz, 2H).  $^{13}\text{C}$  NMR (101 MHz, DMSO- $d_6$ )  $\delta$  162.7, 138.0, 137.8, 134.3, 131.5, 131.0, 126.5, 122.3, 115.9. HRMS (ESI<sup>+</sup>)  $m/z$ :  $[\text{M}+\text{H}]^+$  Calcd for  $\text{C}_{13}\text{H}_9\text{BrCl}_2\text{NO}$ , 343.9245; found: 343.9238.

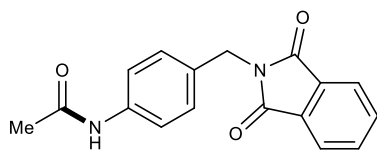

#### *N*-(4-((1,3-Dioxoisindolin-2-yl)methyl)phenyl)benzamide (4p)<sup>3</sup>

The compound was isolated as a white solid (84.7 mg, 72%) by flash column chromatography (petroleum ether/ethyl acetate = 2/1).  $^1\text{H}$  NMR (400 MHz, DMSO- $d_6$ )  $\delta$  9.93 (s, 1H), 7.96 – 7.79 (m, 4H), 7.51 (d,  $J = 8.2$  Hz, 2H), 7.23 (d,  $J = 8.2$  Hz, 2H),

4.70 (s, 2H), 2.01 (s, 3H).  $^{13}\text{C}$  NMR (101 MHz, DMSO- $d_6$ )  $\delta$  168.3, 167.7, 138.6, 134.5, 131.6, 131.1, 128.0, 123.2, 119.1, 40.5, 24.0.

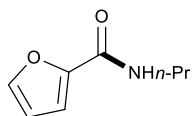

### **N-Propylfuran-2-carboxamide (4q)<sup>18</sup>**

The compound was isolated as a yellow solid (20.5 mg, 34%) by flash column chromatography (petroleum ether/ethyl acetate = 10/1).  $^1\text{H}$  NMR (400 MHz,  $\text{CDCl}_3$ )  $\delta$  7.30 (d,  $J$  = 1.8 Hz, 1H), 6.97 (d,  $J$  = 2.7 Hz, 1H), 6.73 (s, 1H), 6.34 (dd,  $J$  = 3.5, 1.8 Hz, 1H), 3.26 (q,  $J$  = 14.2, 6.2 Hz, 1H), 1.50 (h,  $J$  = 7.4 Hz, 2H), 0.83 (t,  $J$  = 7.4 Hz, 3H).  $^{13}\text{C}$  NMR (101 MHz,  $\text{CDCl}_3$ )  $\delta$  158.3, 147.9, 143.5, 113.4, 111.6, 40.6, 22.6, 11.1.

## **5. References**

1. E. Qu, S. Li, J. Bai, Y. Zheng and W. Li, Nickel-Catalyzed Reductive Cross-Coupling of N-Acyl and N-Sulfonyl Benzotriazoles with Diverse Nitro Compounds: Rapid Access to Amides and Sulfonamides, *Org. Lett.*, 2021, **24**, 58-63.
2. M. E. Khatib, M. Elagawany, E. Çalışkan, E. F. Davis, H. M. Faidallah, S. A. El-feky and A. R. Katritzky, Total Synthesis of Cyclic Heptapeptide Rolloamide B, *Chem. Commun.*, 2013, **49**, 2631-2633.
3. J. Bai, S. Li, R. Zhu, Y. Li and W. Li,  $\text{B}_2(\text{OH})_4$ -Mediated Reductive Transamidation of N-Acyl Benzotriazoles with Nitro Compounds En Route to Aqueous Amide Synthesis, *J. Org. Chem.*, 2023, **88**, 3714-3723.
4. J. Yang, M. Song, H. Zhou, G. Wang, B. Ma, Y. Qi and C. Huo, Visible-Light-Mediated Hydroacylation of Azobenzenes with  $\alpha$ -Keto Acids, *Org. Lett.*, 2020, **22**, 8407-8412.
5. G. Zhang, Y. Zhao, L. Xuan and C. Ding,  $\text{SO}_2\text{F}_2$ -Activated Efficient Beckmann Rearrangement of Ketoximes for Accessing Amides and Lactams, *Eur. J. Org. Chem.*, 2019, **2019**, 4911-4915.
6. Z. Xu, W. Wang, Y. Xu, S. Song, J. Yu, W. Song, H. Xu, H. Fu and Z. Li, Visible Light-Promoted Goldberg Reaction Driven by a Preponderant Facet of CuO



- Nanocrystals, *ACS Catal.*, 2023, **13**, 13920-13930.
7. N. Xiong, Y. Dong, B. Xu, Y. Li and R. Zeng, Mild Amide Synthesis Using Nitrobenzene under Neutral Conditions, *Org. Lett.*, 2022, **24**, 4766-4771.
  8. S. A. Rzhevskiy, A. A. Ageshina, G. A. Chesnokov, P. S. Griбанov, M. A. Topchiy, M. S. Nechaev and A. F. Asachenko, Solvent- and transition metal-free amide synthesis from phenyl esters and aryl amines, *RSC Adv.*, 2019, **9**, 1536-1540.
  9. Q. Li, P. Dai, H. Tang, M. Zhang and J. Wu, Photomediated reductive coupling of nitroarenes with aldehydes for amide synthesis, *Chem. Sci.*, 2022, **13**, 9361-9365.
  10. O. Gbadebo, K. Fox, G. Sutton, P. V. Murphy, D. Smith and P. O'Leary, Novel versatile synthesis method for amides, carbamates and ureas employing a Grignard base, an amine and an ester, *Results in Chemistry*, 2022, **4**, 100253.
  11. U. Kobs and W. P. Neumann, Tin for organic synthesis, 3. Facile and effective synthesis of unusually substituted aromatic N-phenylamides, *Chem. Ber.*, 2006, **123**, 2191-2194.
  12. Q.-L. Zhang, W. Liu, Y. Zhou and F.-L. Zhang, Visible-light-induced iron-catalyzed synthesis of N-aryl amides from nitroarenes and chloroalkanes, *Green Chem.*, 2023, **25**, 5735-5740.
  13. J. D. Williams, W. J. Kerr, S. G. Leach and D. M. Lindsay, A Practical and General Amidation Method from Isocyanates Enabled by Flow Technology, *Angew. Chem. Int. Ed.*, 2018, **57**, 12126-12130.
  14. J.-H. Kwak, S.-W. Won, T.-J. Kim, E. Roh, H.-Y. Kang, H. W. Lee, J.-K. Jung, B. Y. Hwang, Y. Kim, J. Cho and H. Lee, Synthesis of chroman-2-carboxylic acid N-(substituted)phenylamides and their inhibitory effect on nuclear factor- $\kappa$ B (NF- $\kappa$ B) activation, *Arch. Pharmacol Res.*, 2008, **31**, 133-141.
  15. S. K. Xiang, J. M. Li, H. Huang, C. Feng, H. L. Ni, X. Z. Chen, B. Q. Wang, K. Q. Zhao, P. Hu and C. Redshaw, para-Selective C–H Amidation of Simple Arenes with Nitriles, *Adv. Synth. Catal.*, 2015, **357**, 3435-3440.
  16. J. Rodriguez, N. Adet, N. Saffon-Merceron and D. Bourissou, Au(I)/Au(III)-Catalyzed C–N coupling, *Chem. Commun.*, 2020, **56**, 94-97.
  17. M. Parmentier, M. K. Wagner, K. Magra and F. Gallou, Selective Amidation of Unprotected Amino Alcohols Using Surfactant-in-Water Technology: A Highly

Desirable Alternative to Reprotoxic Polar Aprotic Solvents, *Org. Process Res. Dev.*, 2016, **20**, 1104-1107.

18. H.-c. Cheng, L. Zhou, X. Zhou, J.-l. Ma, P. Guo, Y. Zhang and H.-b. Ji, Ligand-free copper-catalyzed direct amidation of diaryliodonium salts using nitriles as amidation reagents, *Tetrahedron Lett.*, 2021, **71**, 153048.

## **6. Copies of NMR Spectra**

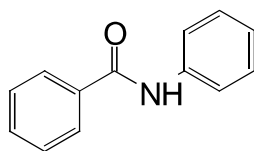

**3a**

<sup>1</sup>H NMR (400 MHz, DMSO-*d*<sub>6</sub>)

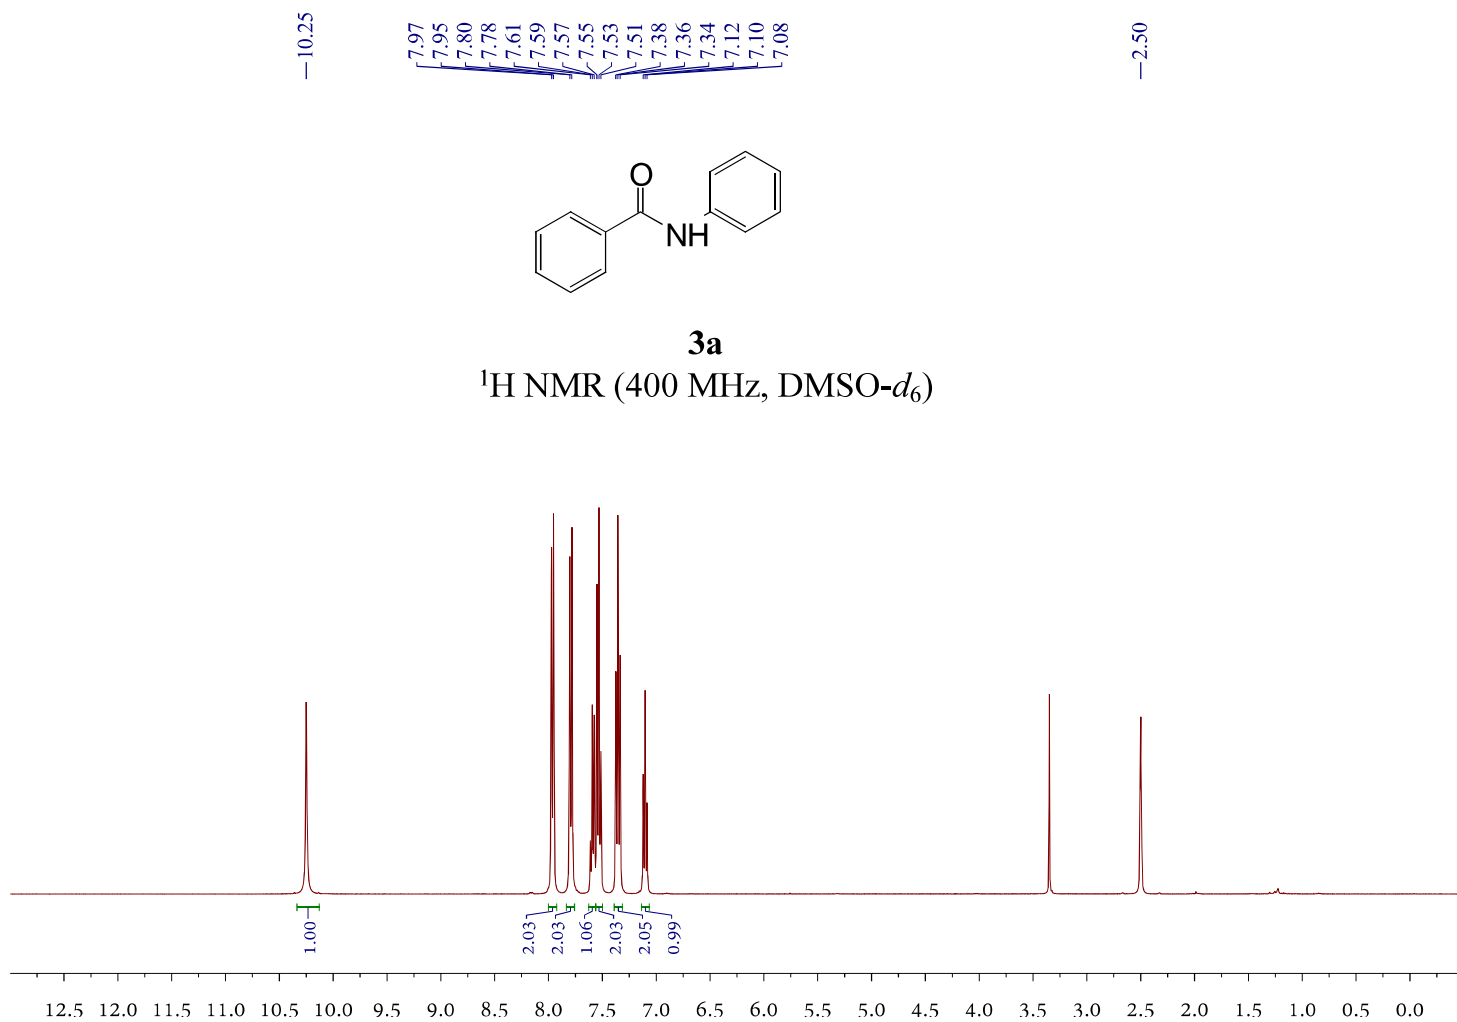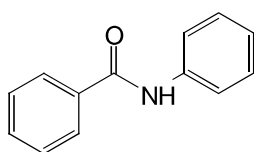

**3a**

<sup>13</sup>C NMR (101 MHz, DMSO-*d*<sub>6</sub>)

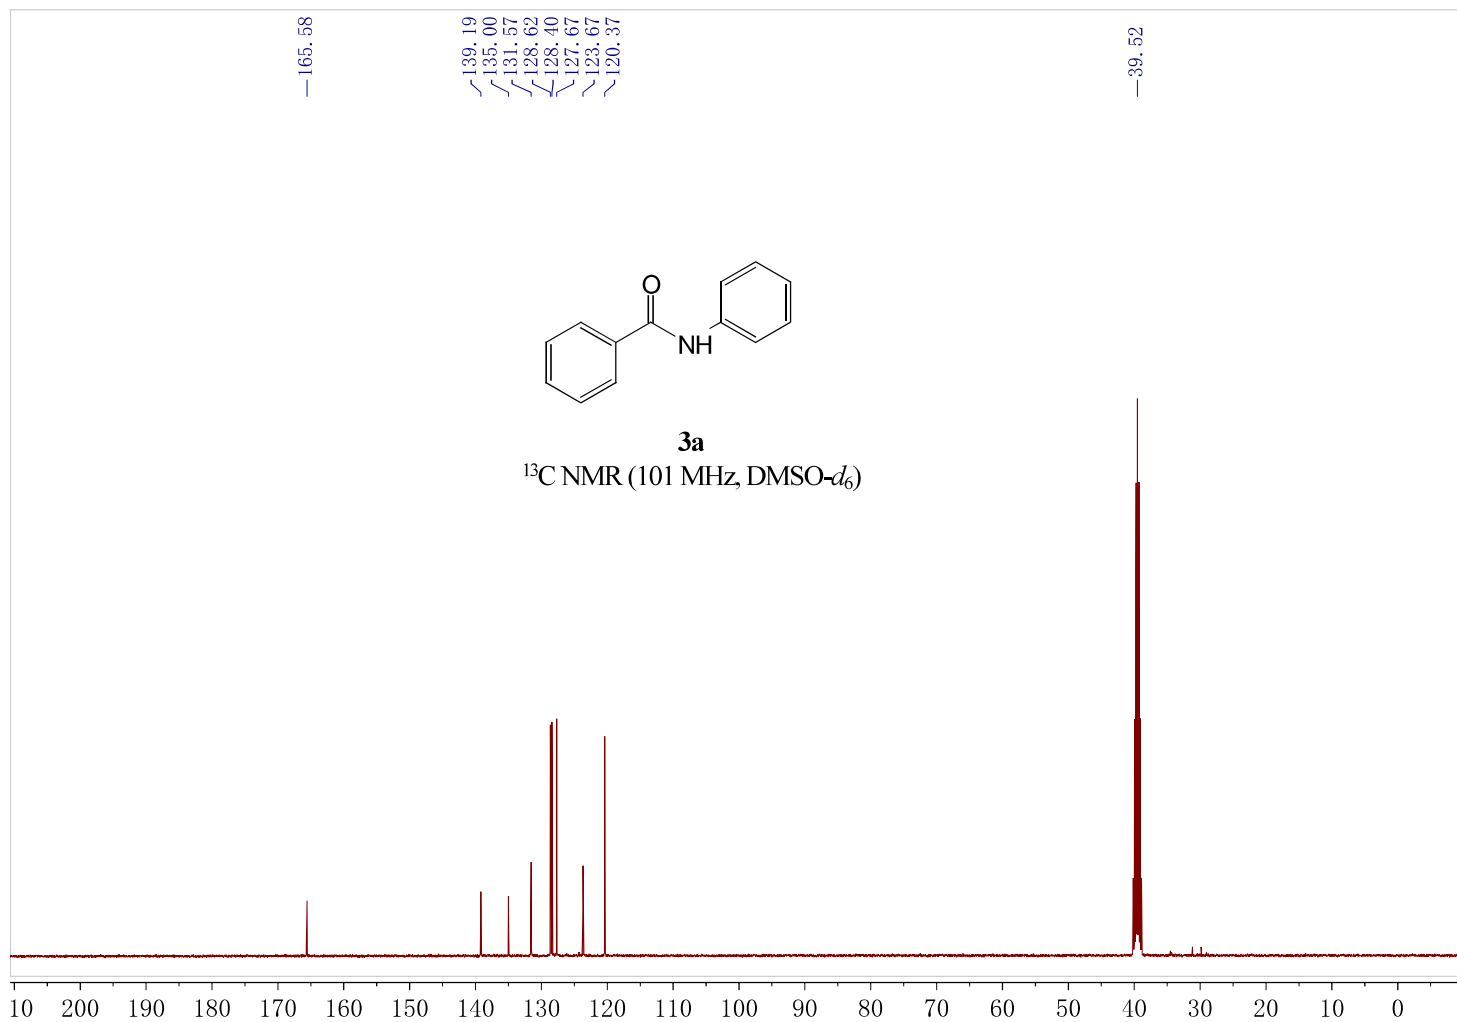

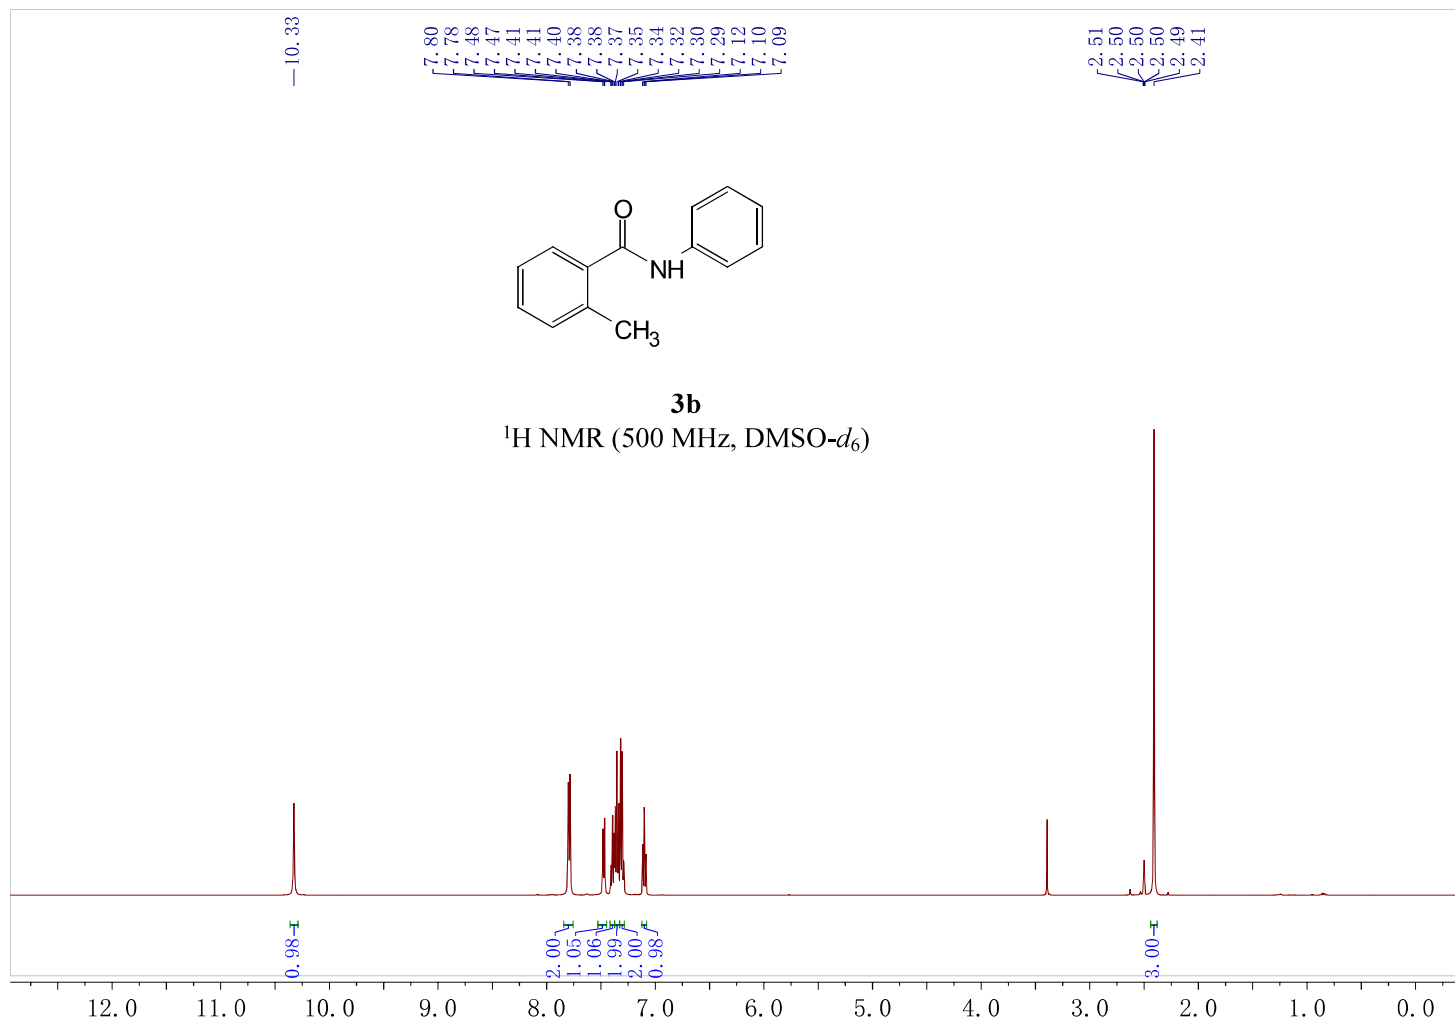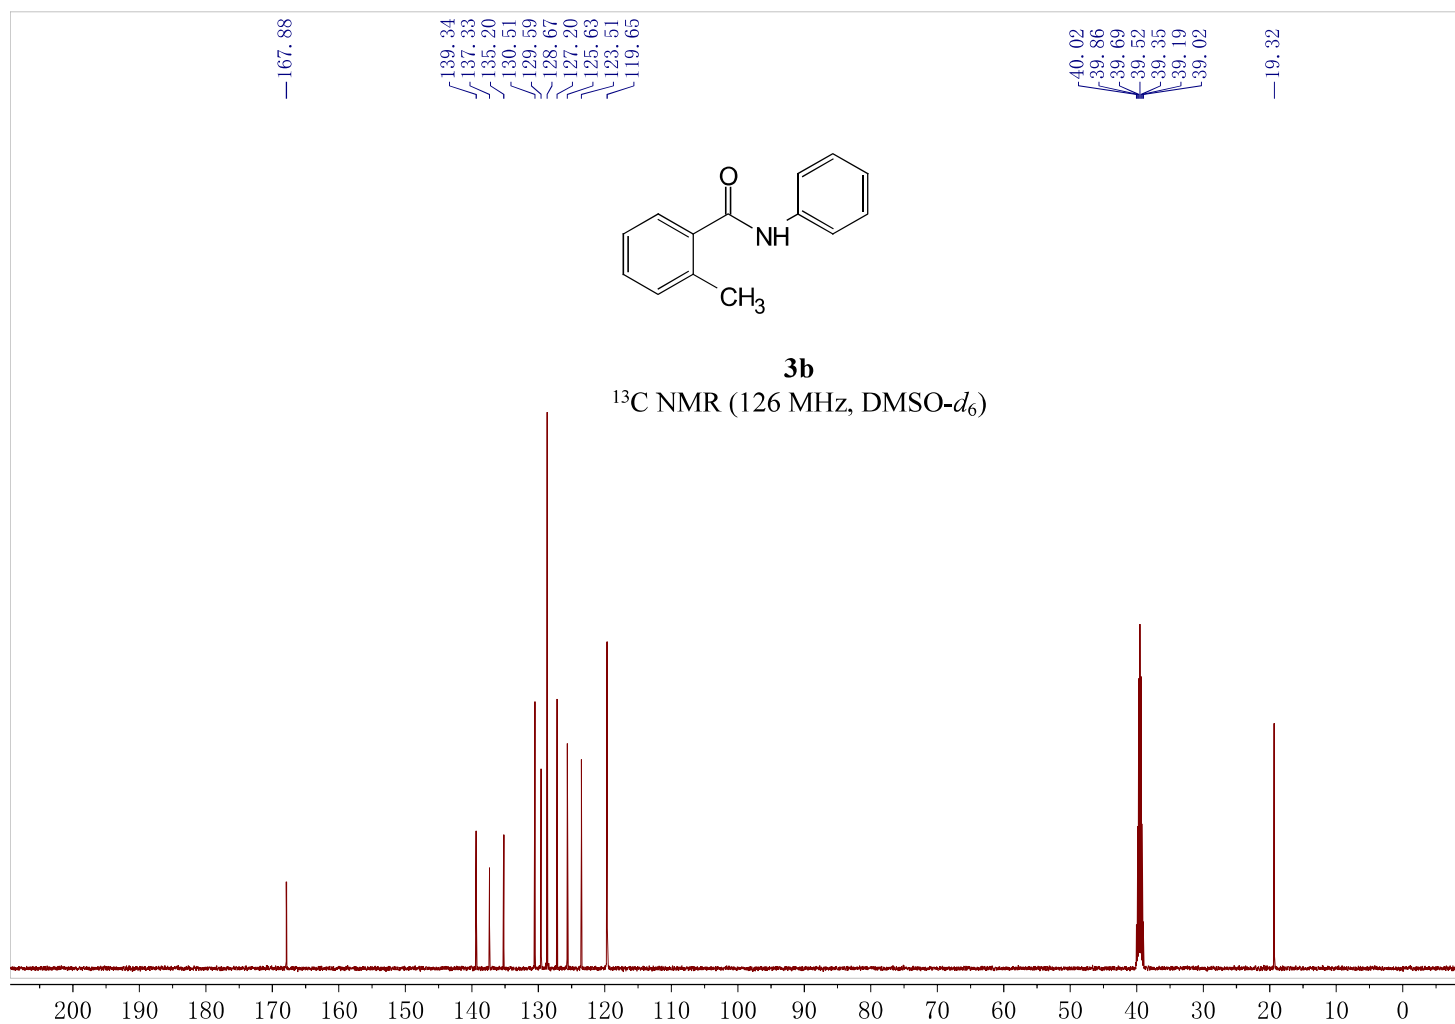

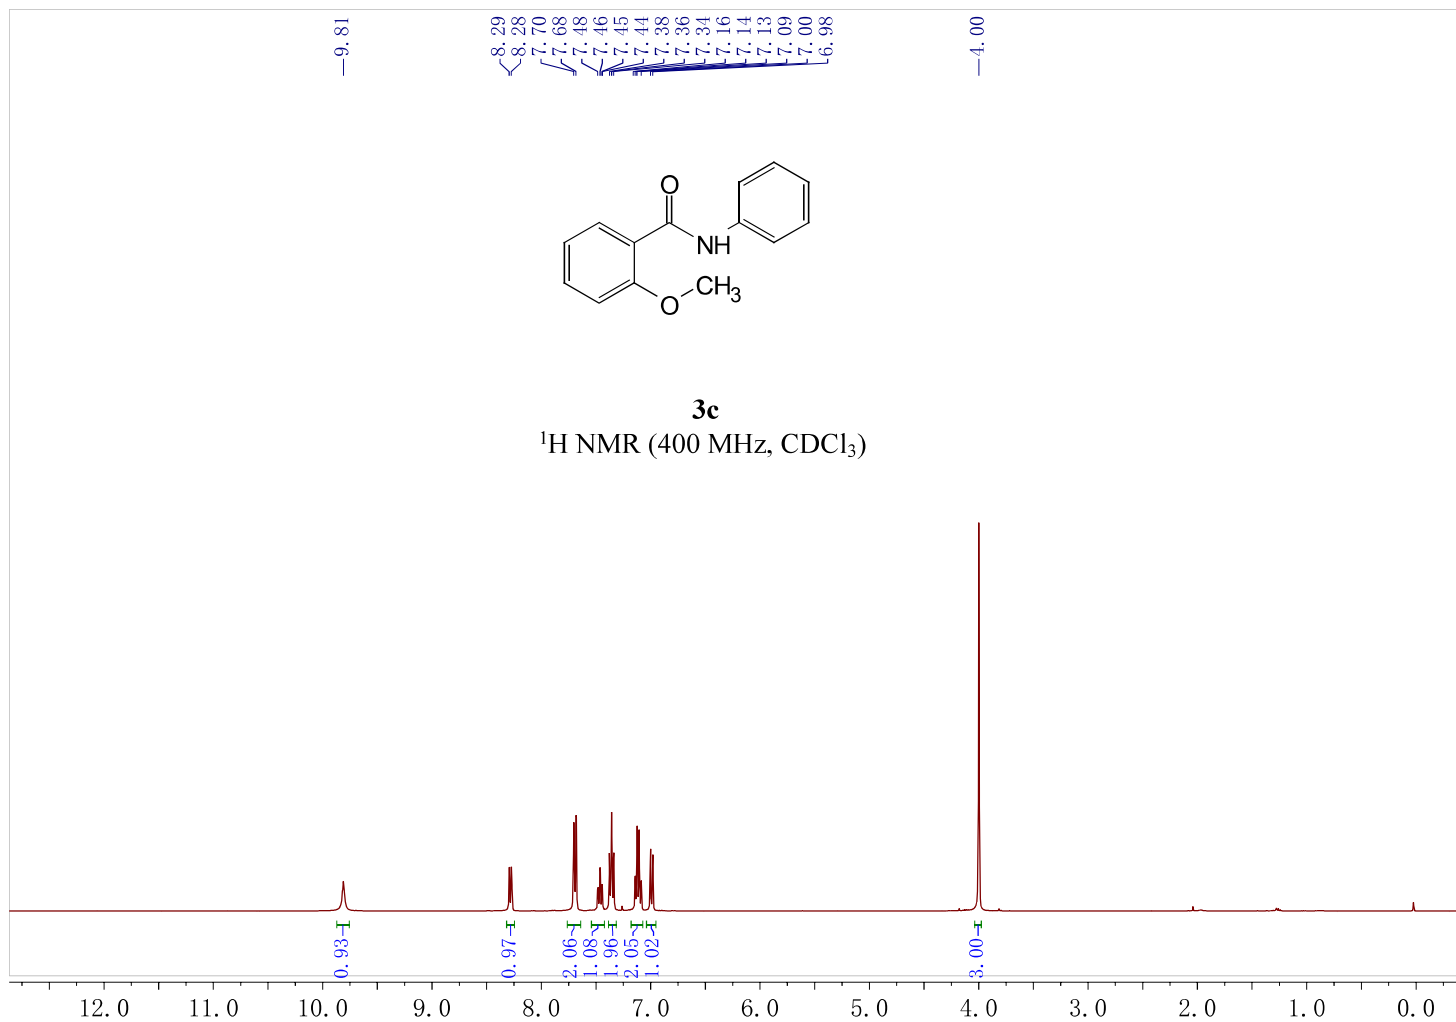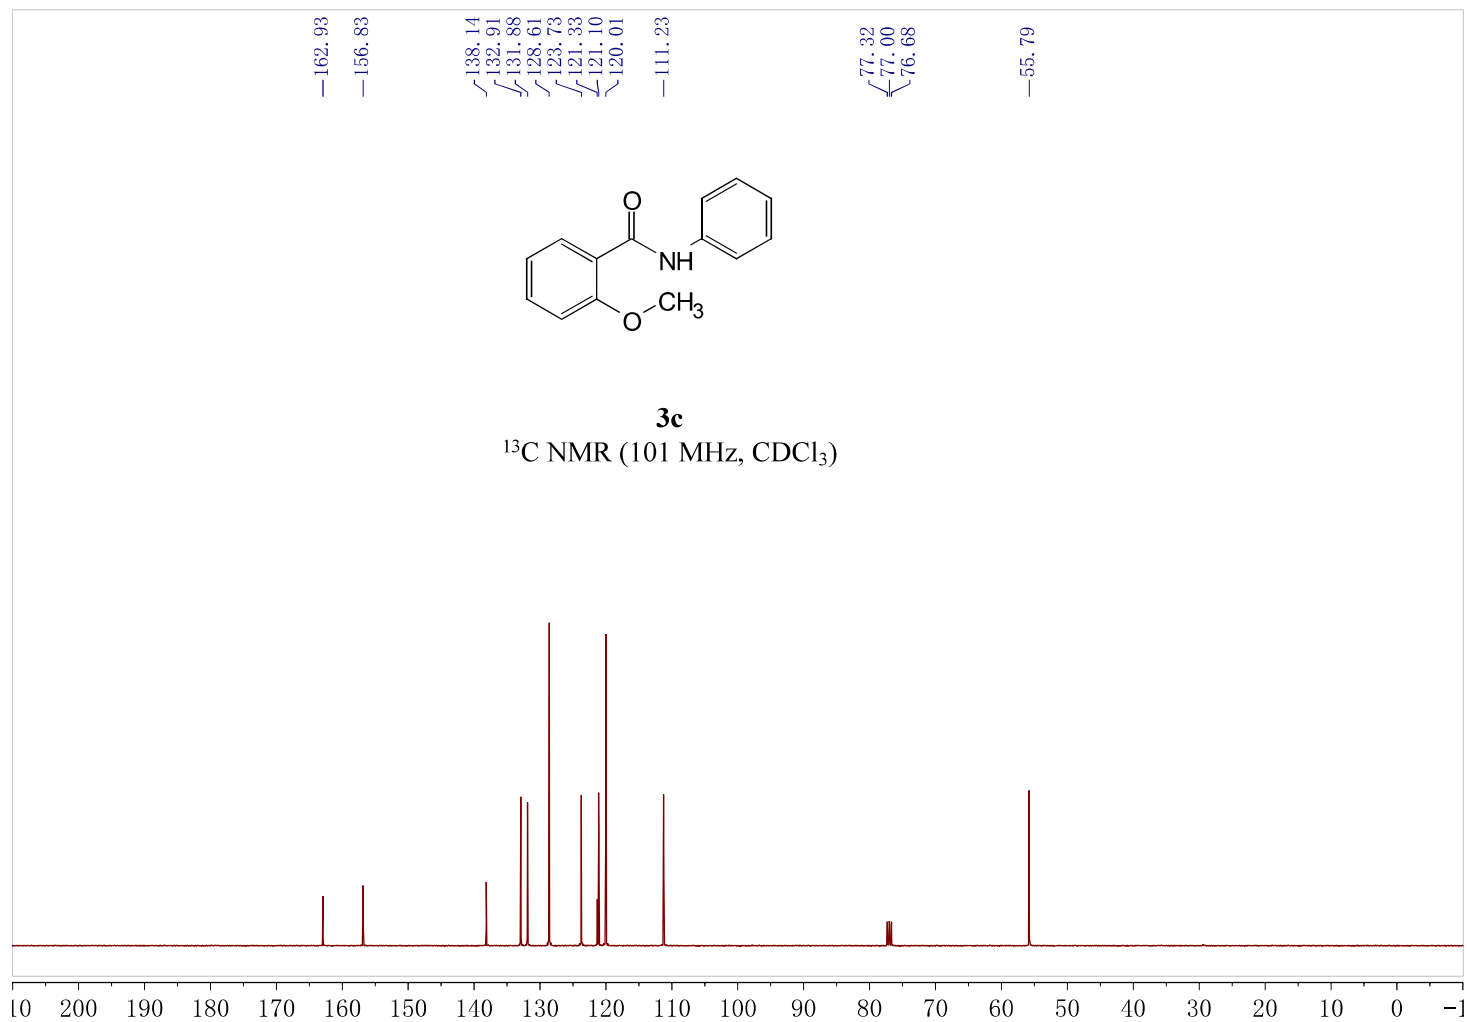

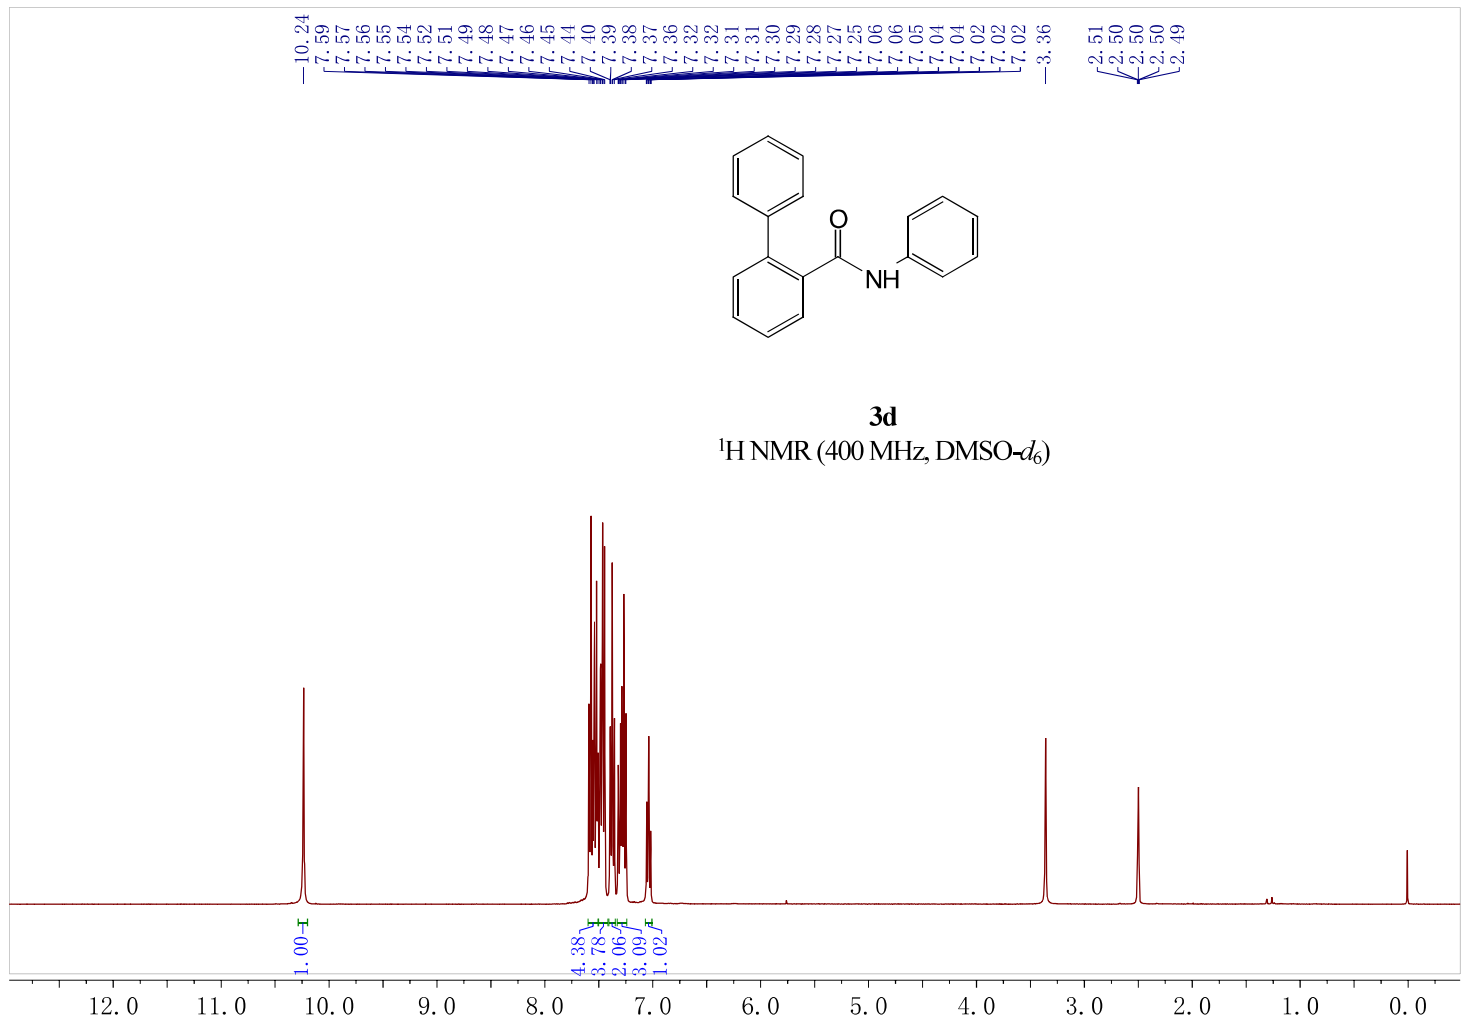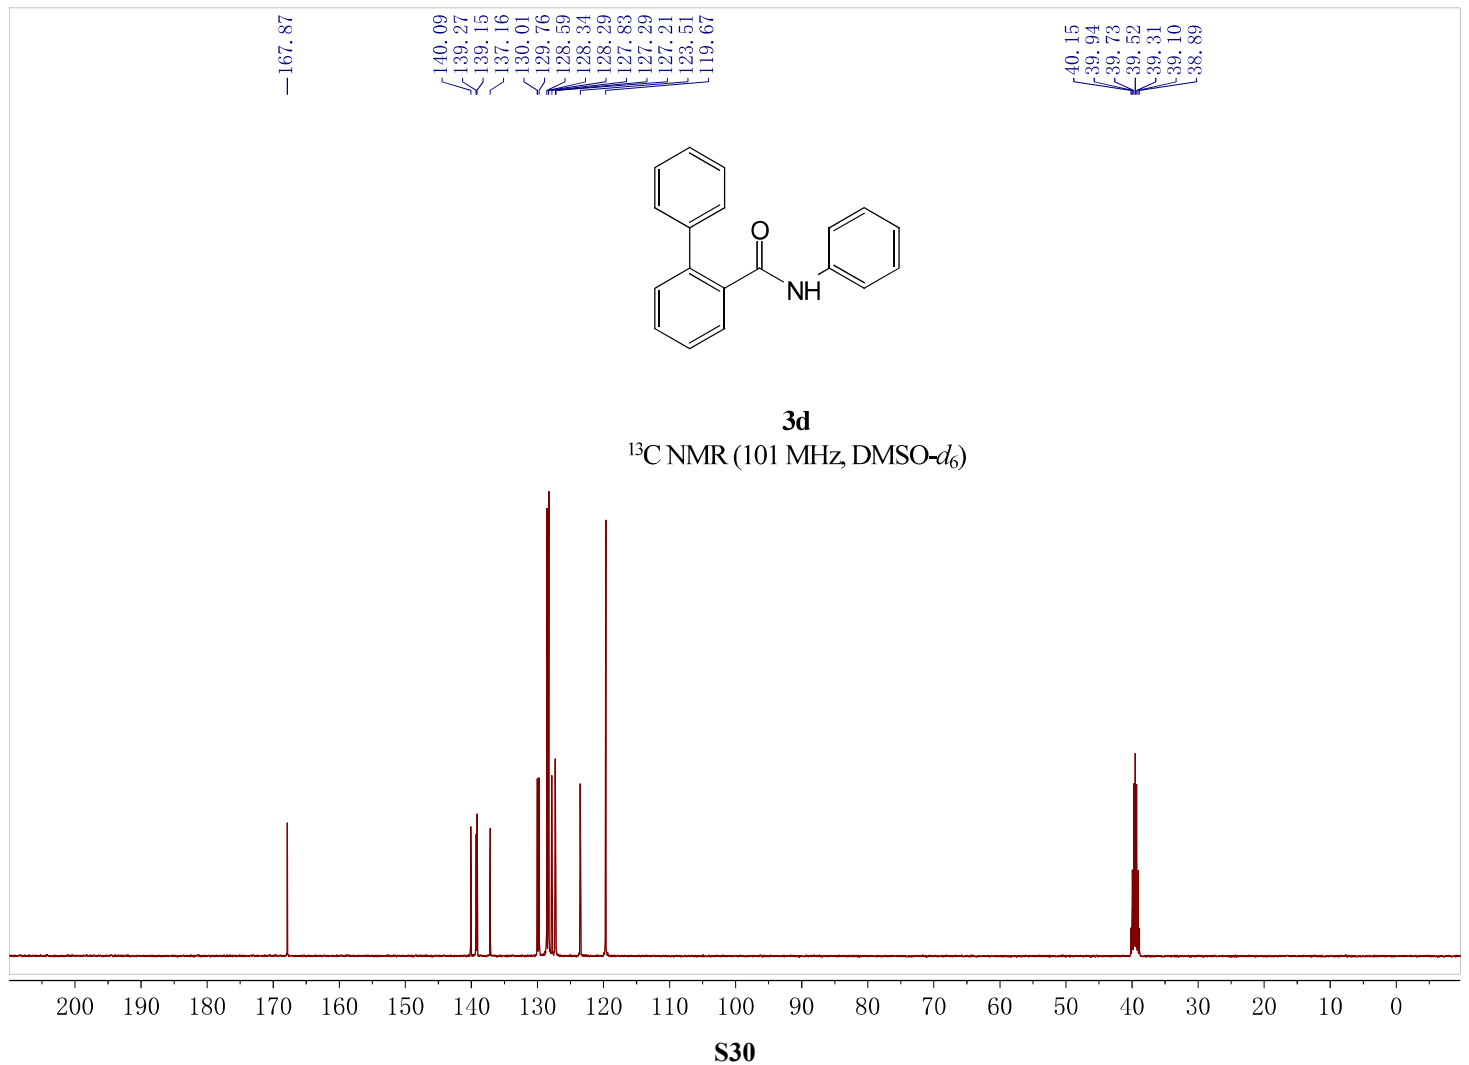

-10.21

7.80  
7.78  
7.76  
7.74  
7.43  
7.42  
7.40  
7.40  
7.37  
7.35  
7.33  
7.12  
7.10  
7.08

2.51  
2.50  
2.50  
2.49  
2.40

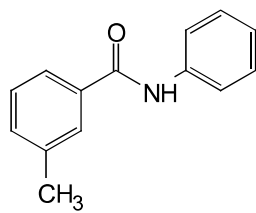

**3e**

<sup>1</sup>H NMR (400 MHz, DMSO-*d*<sub>6</sub>)

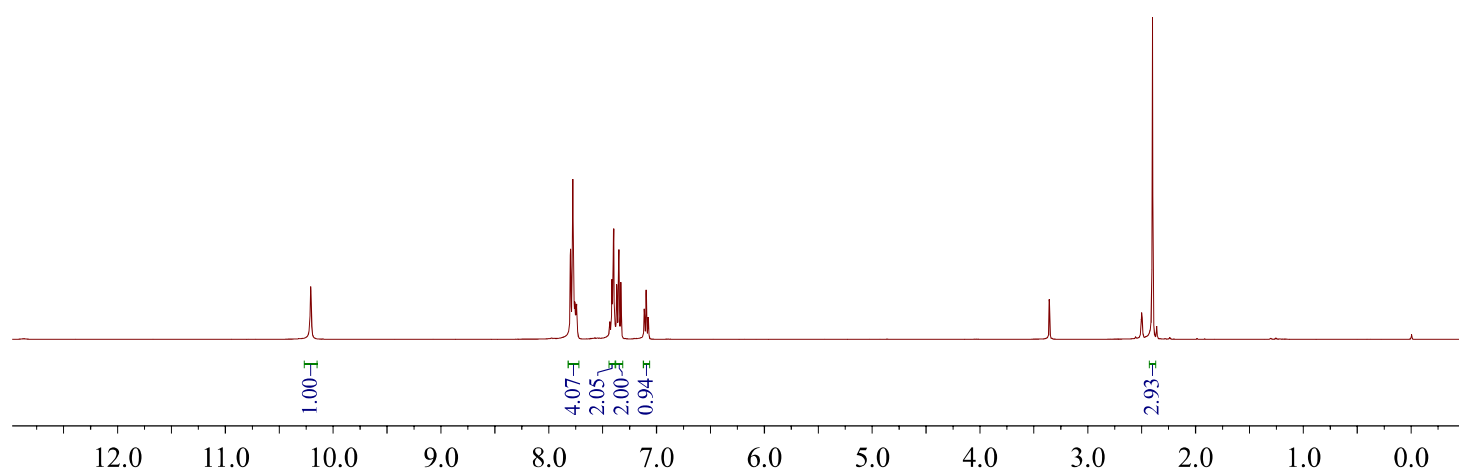

-166.00

138.59  
137.96  
134.91  
132.49  
128.99  
128.54  
127.77  
124.42  
123.94  
120.20

77.32  
77.00  
76.68

-21.33

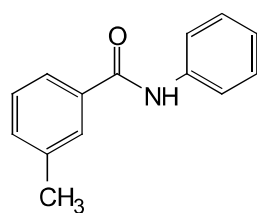

**3e**

<sup>13</sup>C NMR (101 MHz, CDCl<sub>3</sub>)

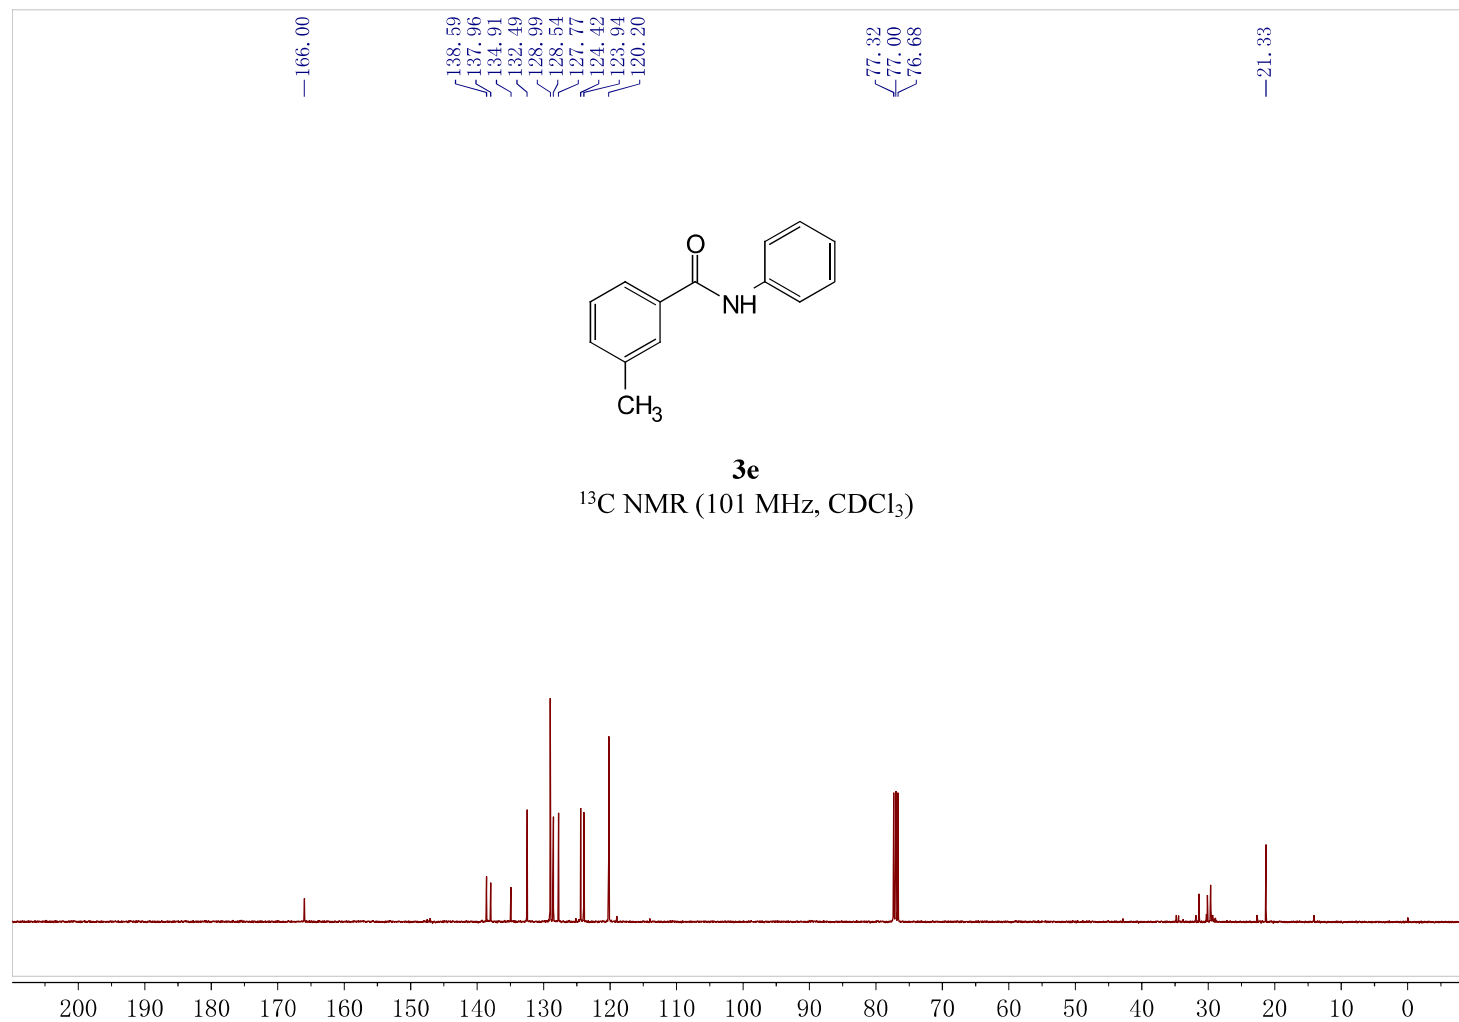

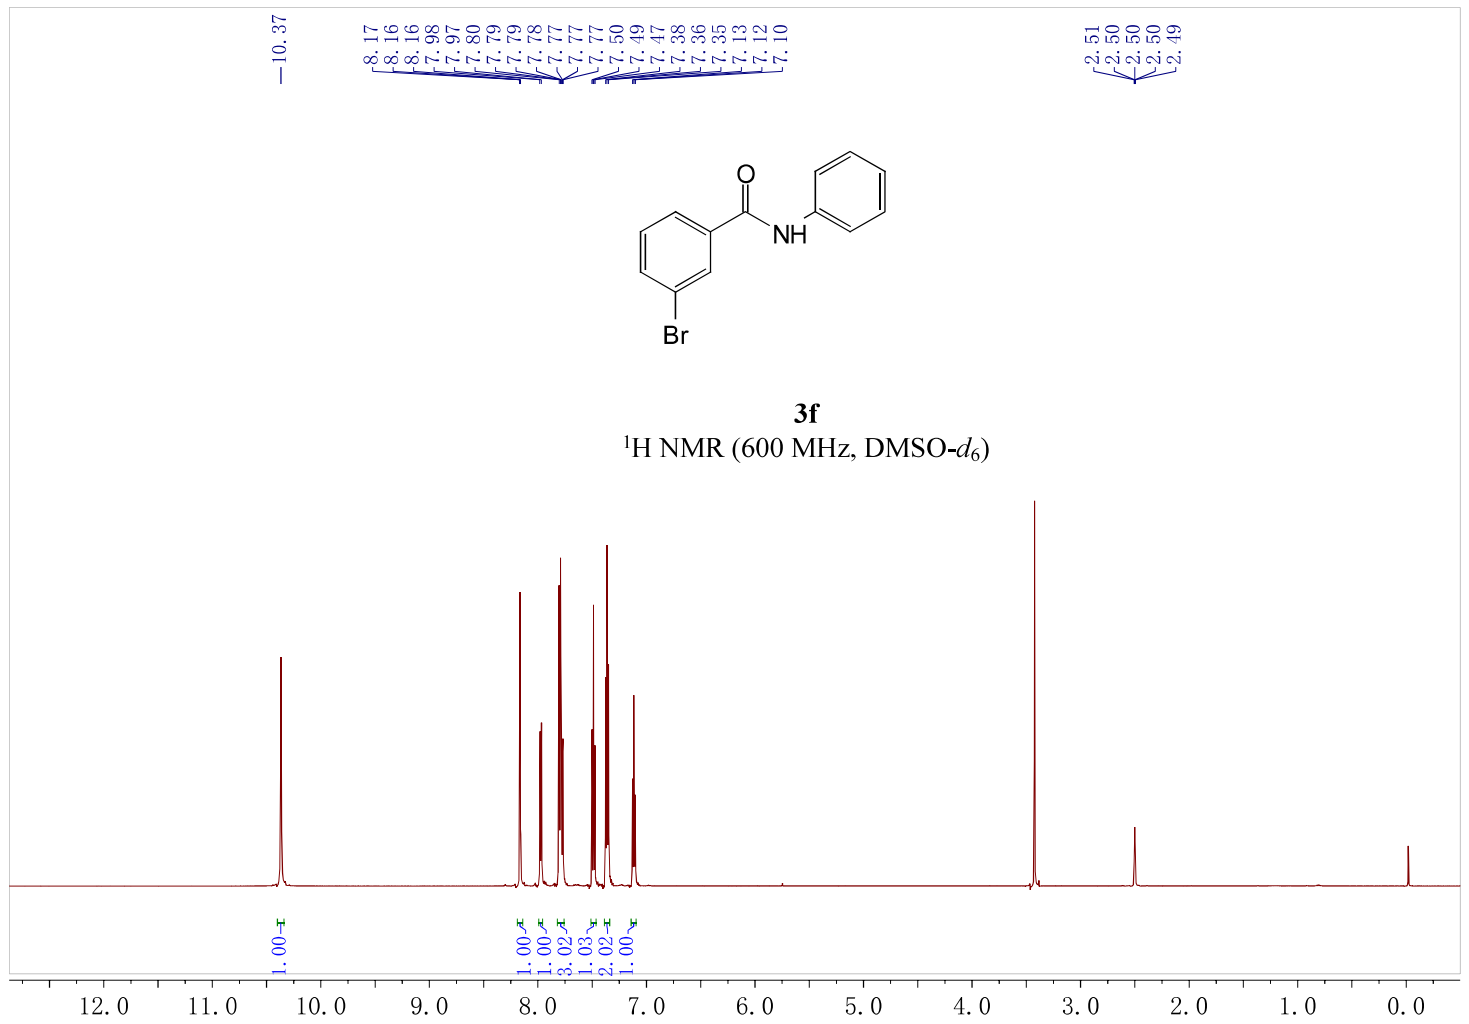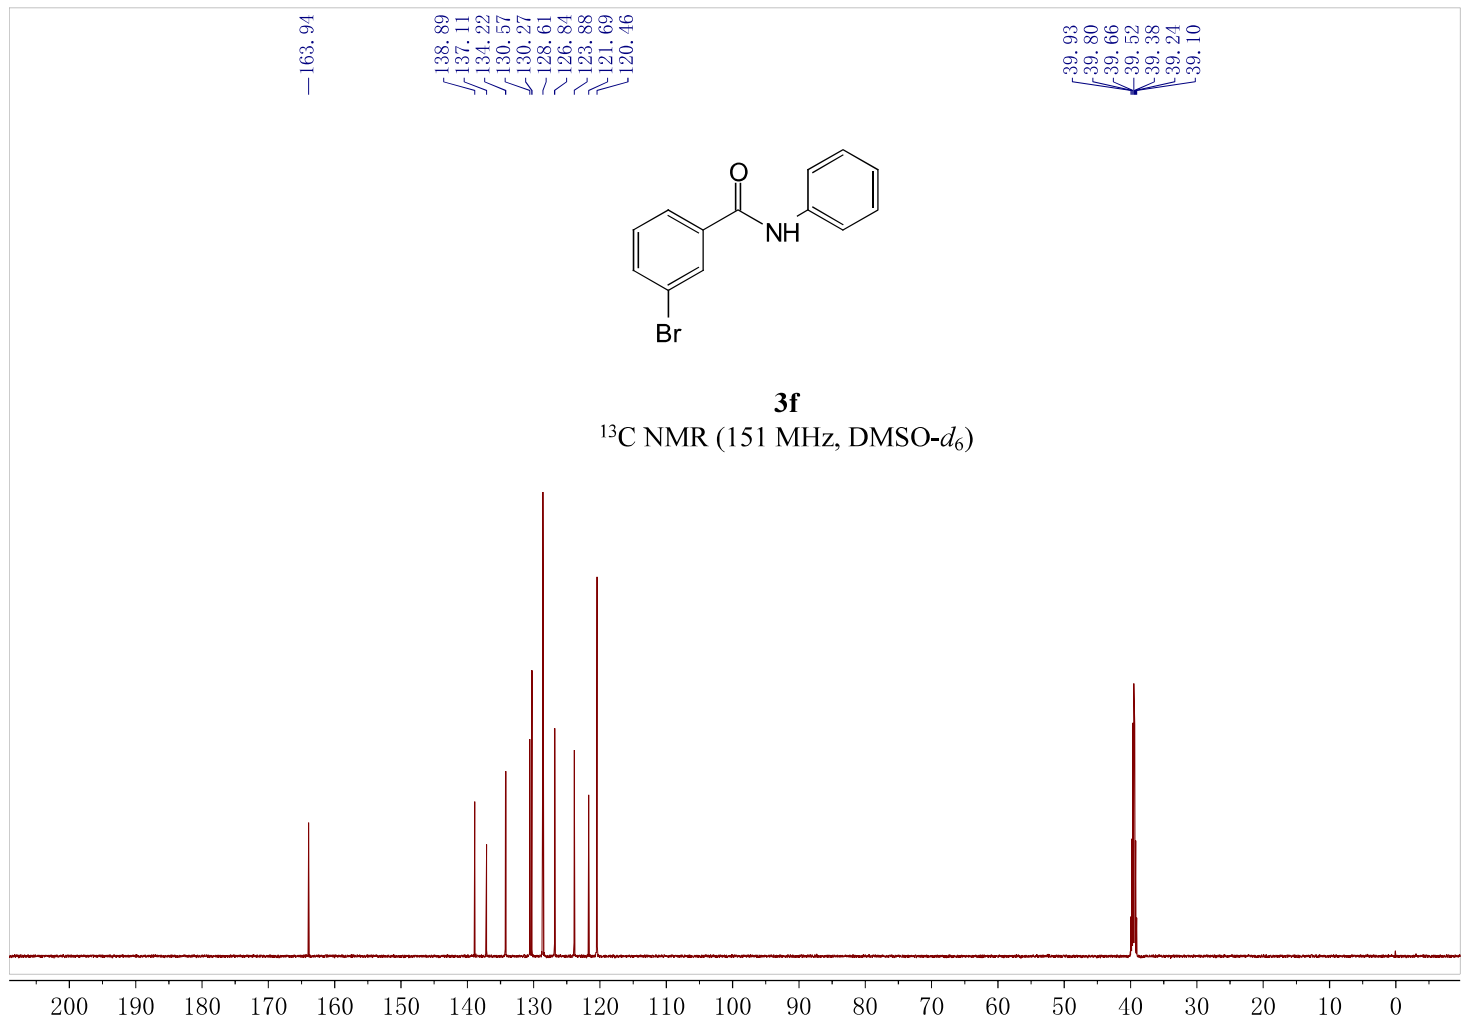



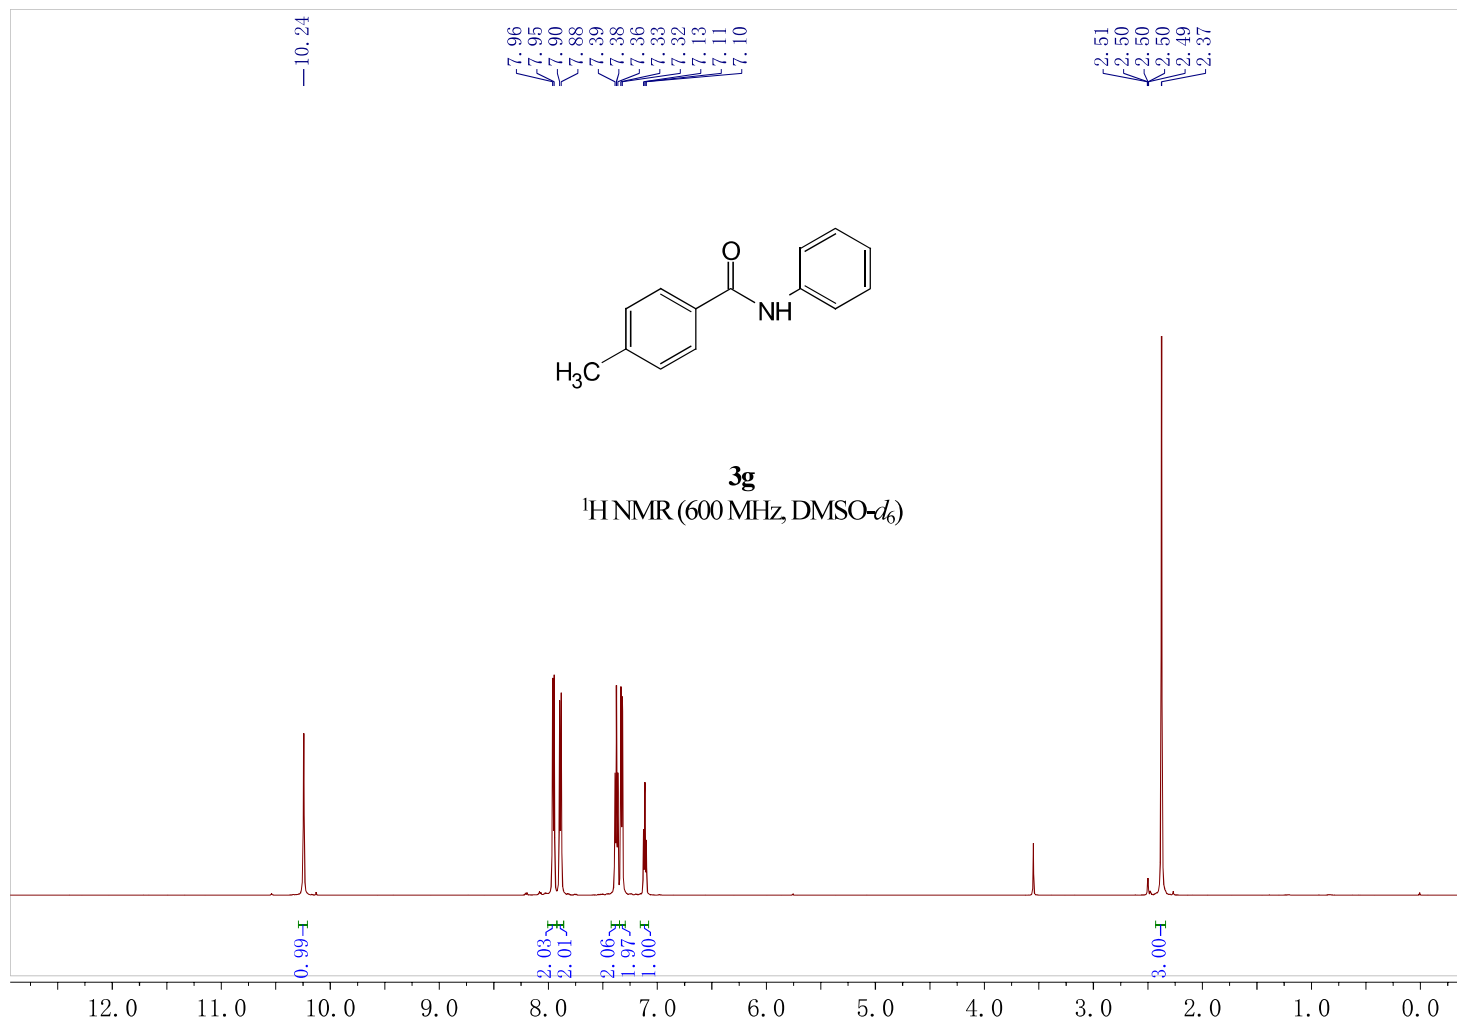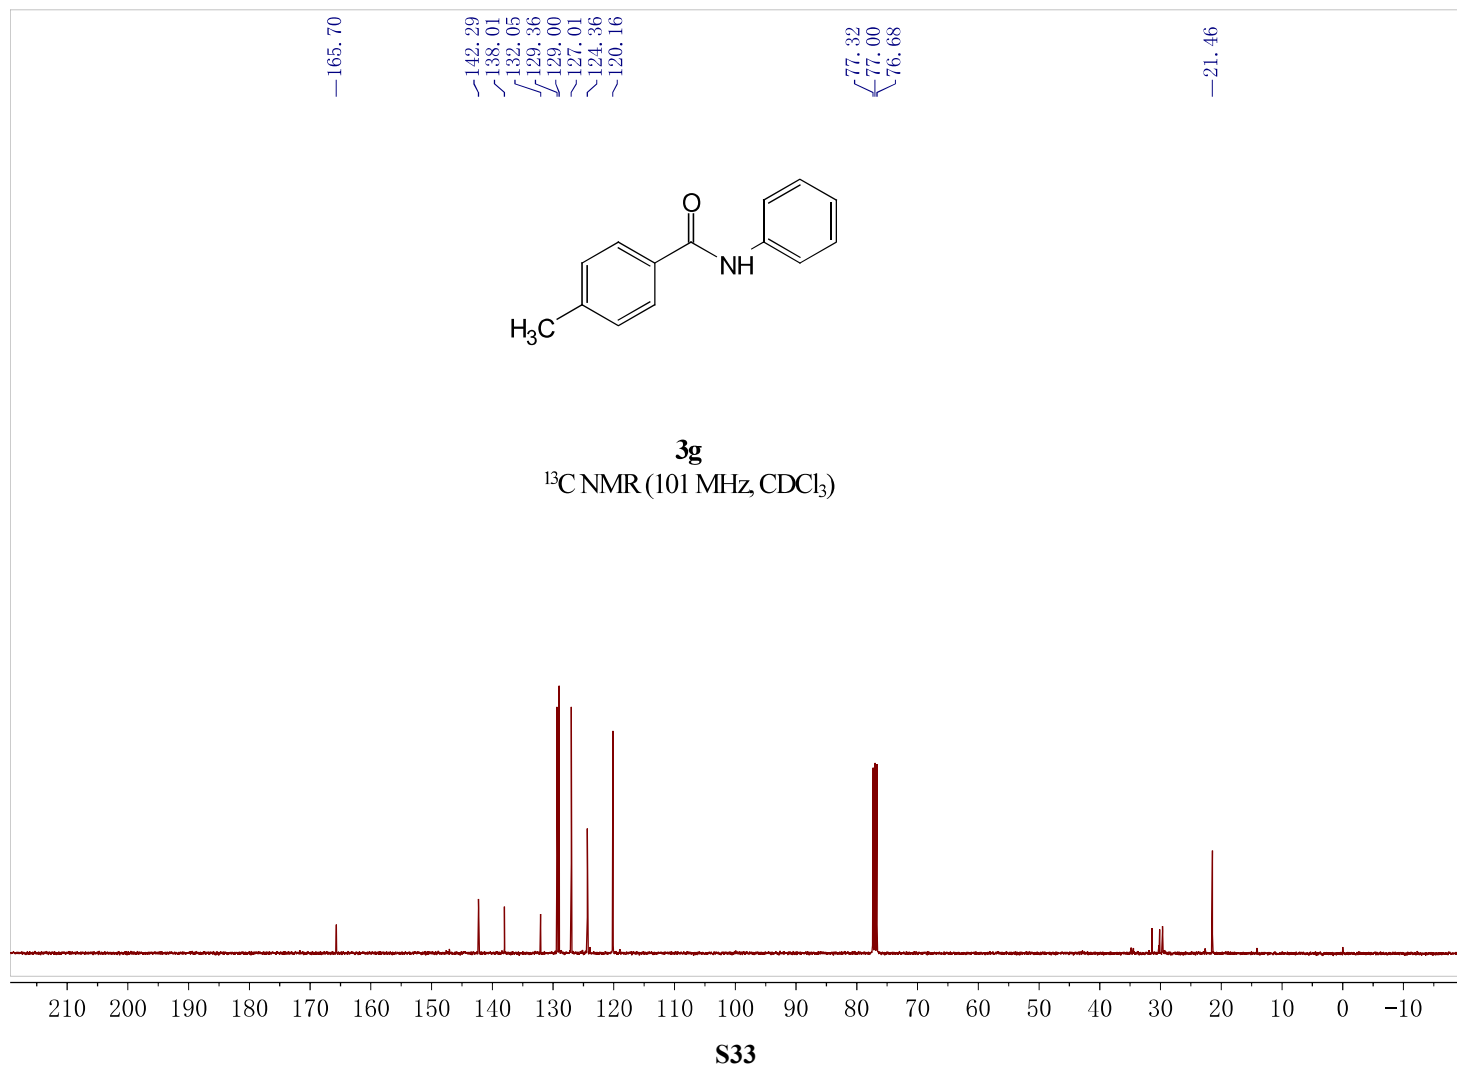

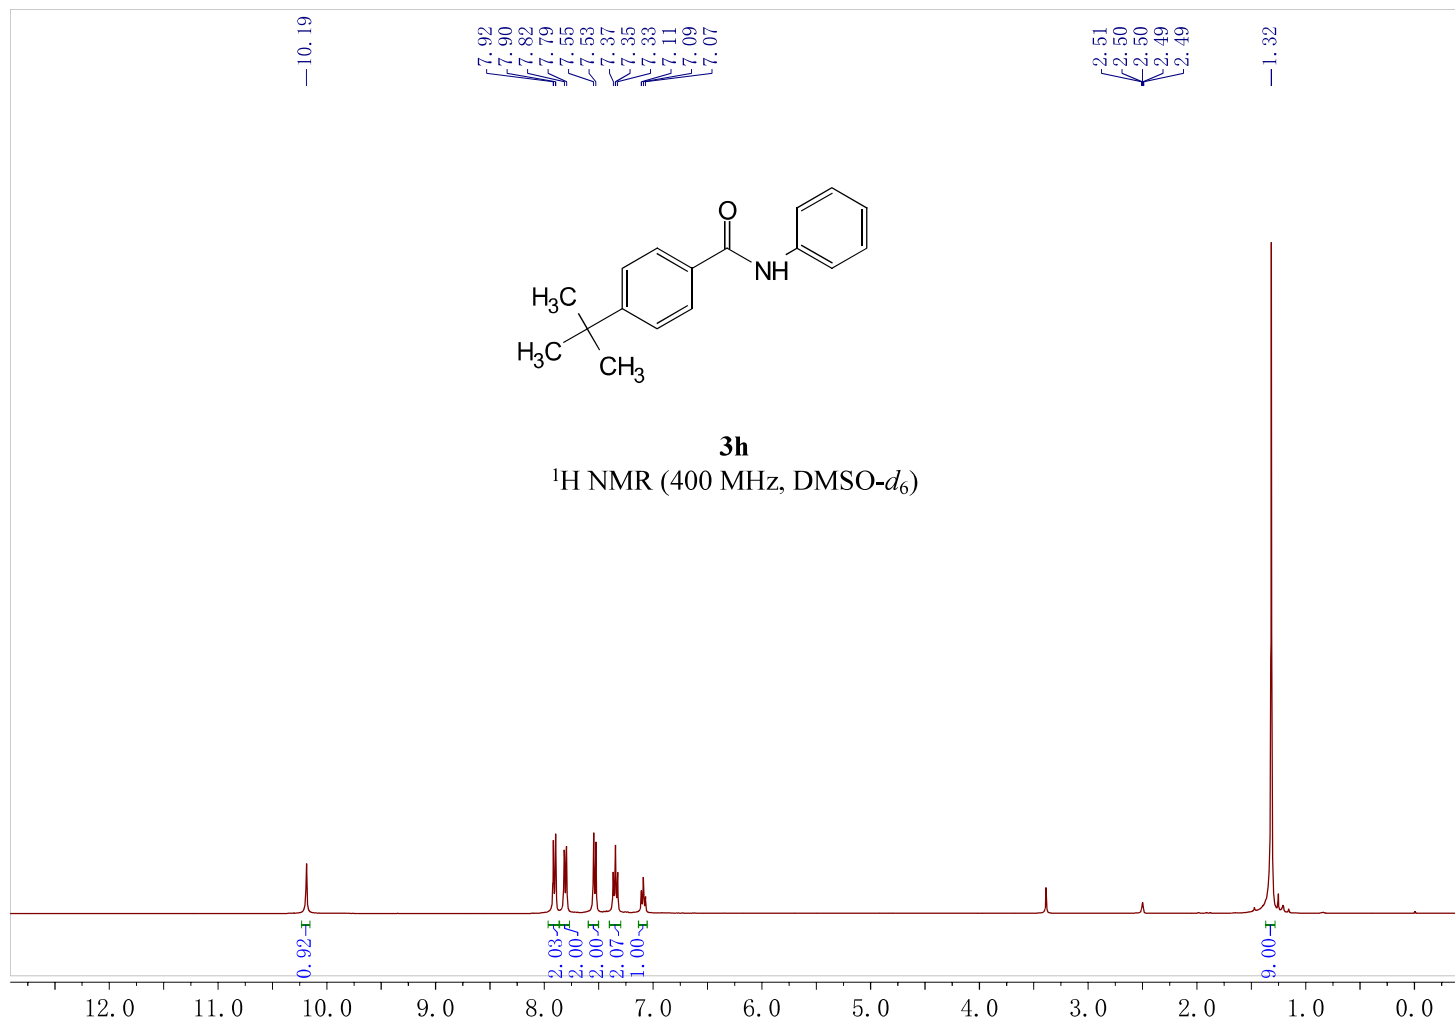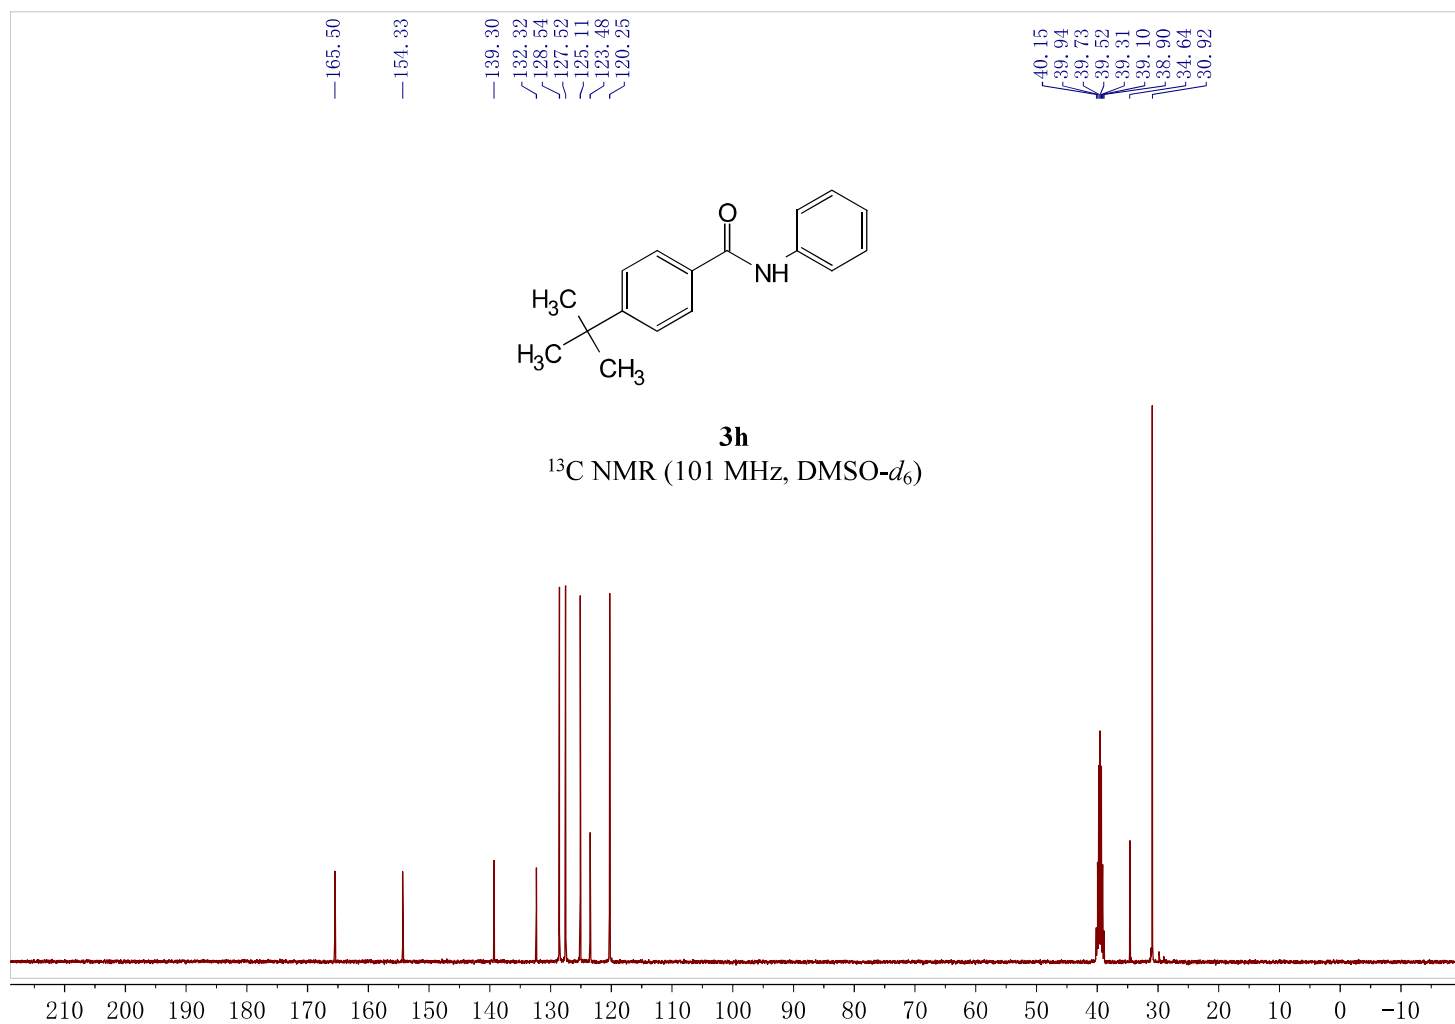

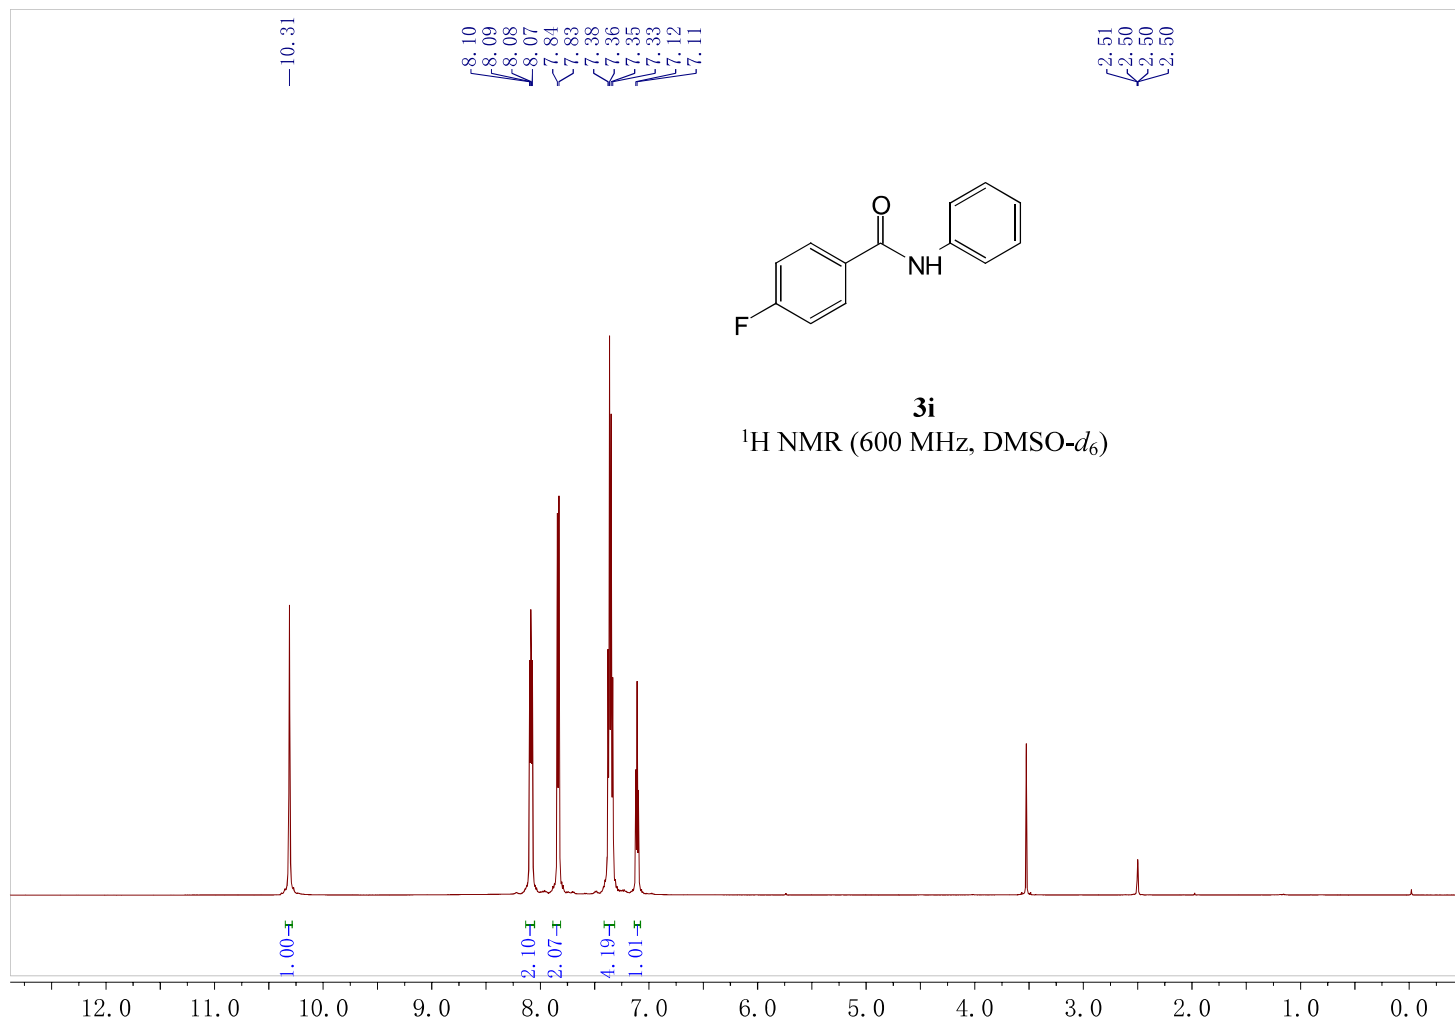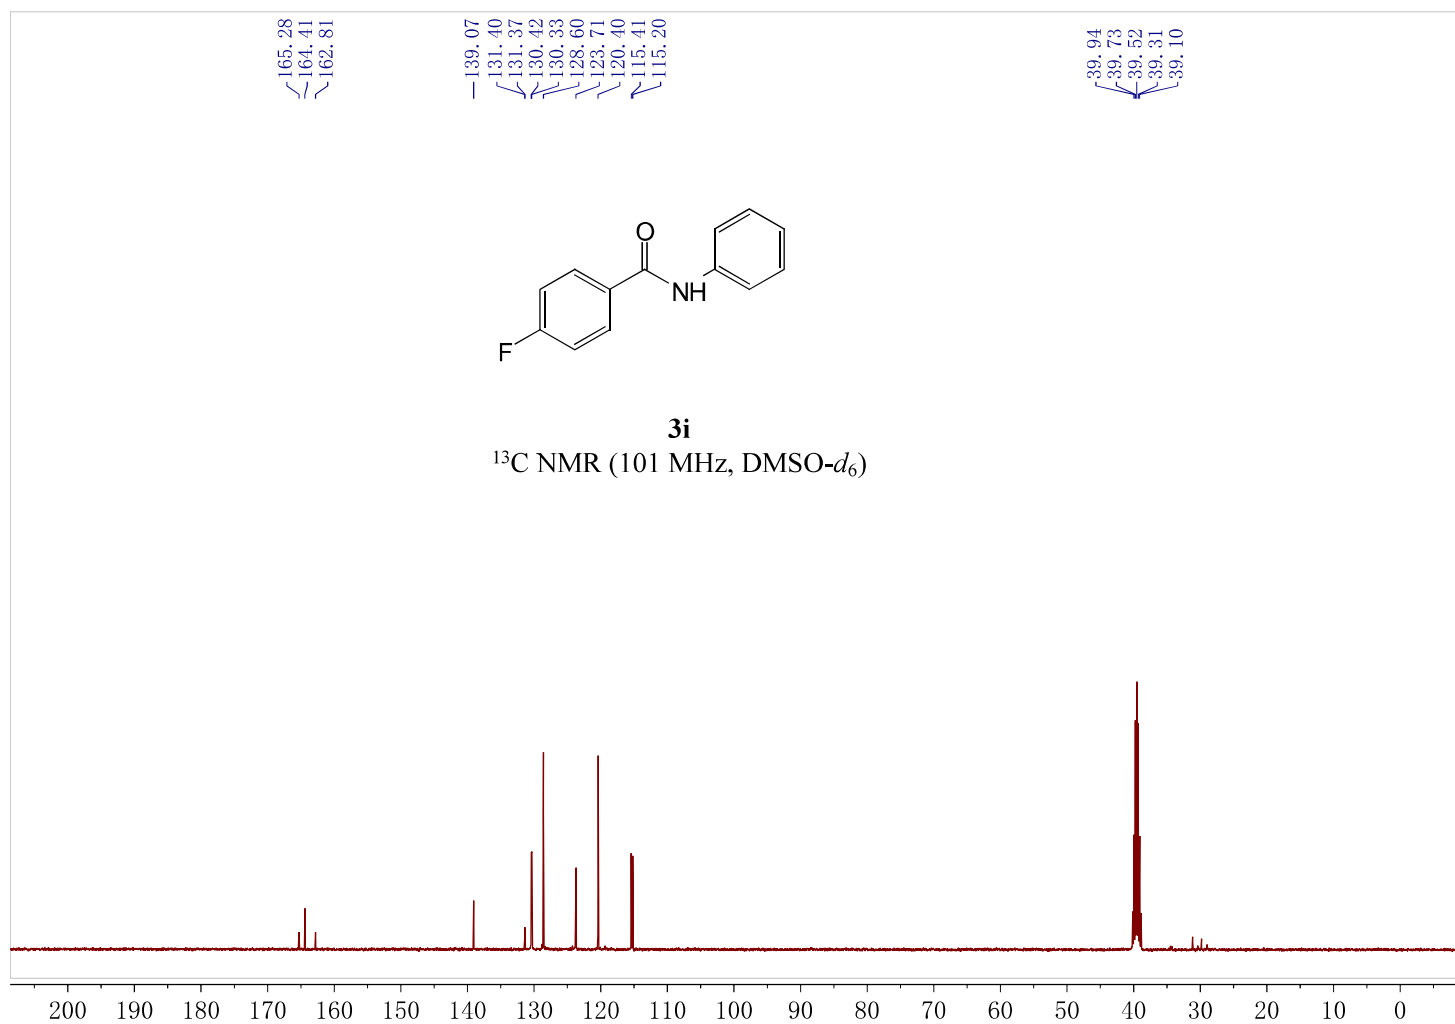

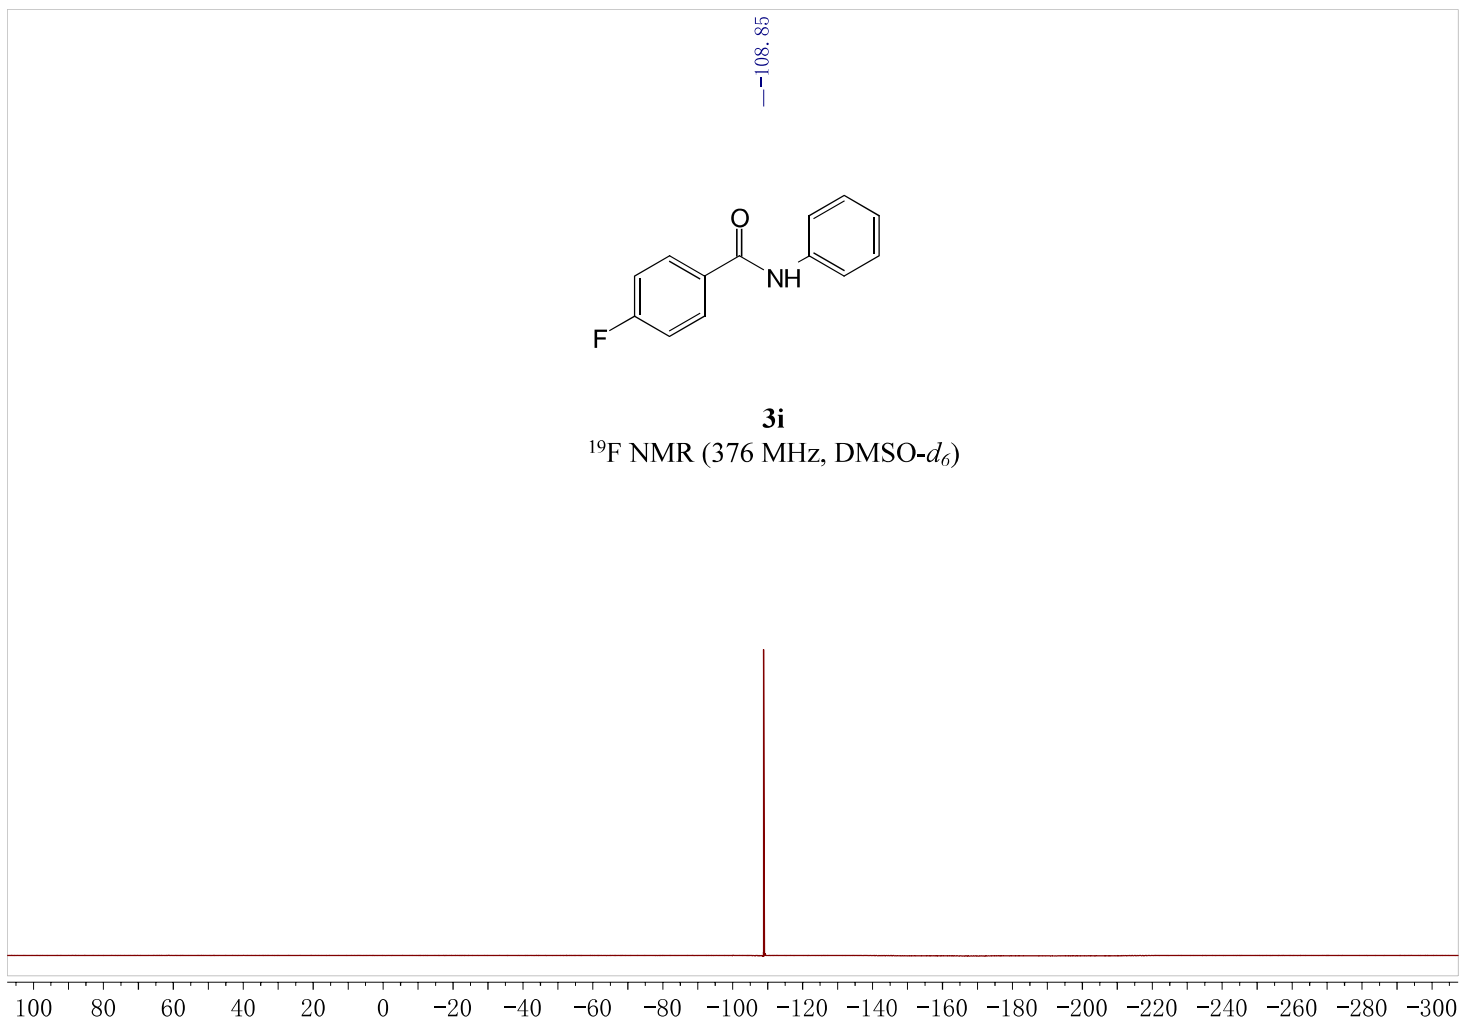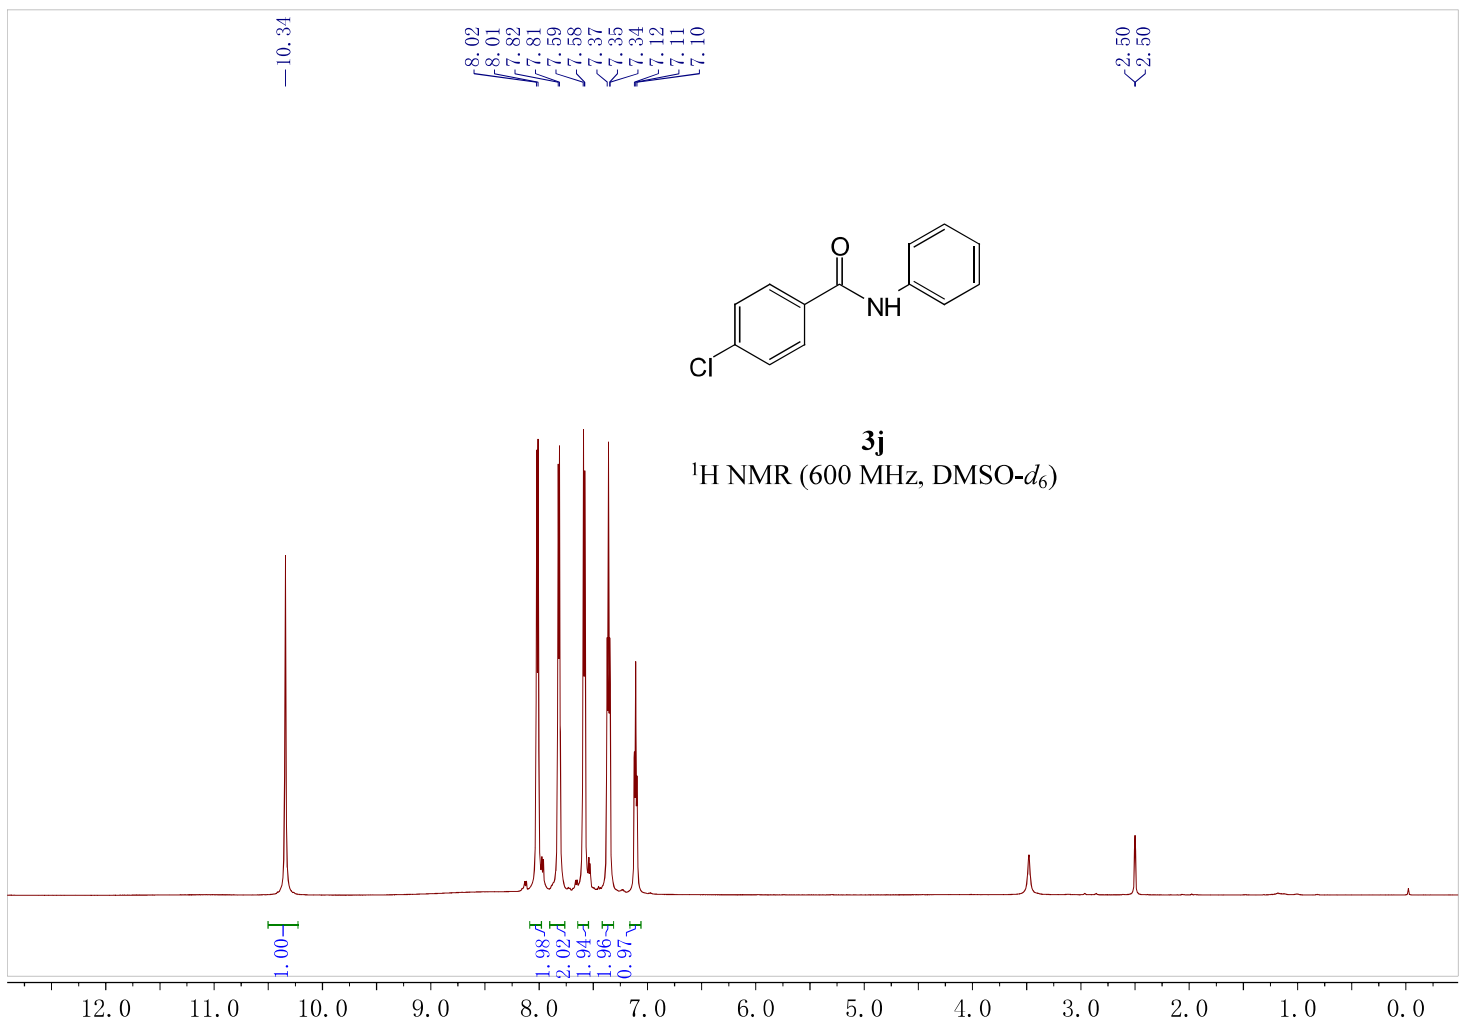

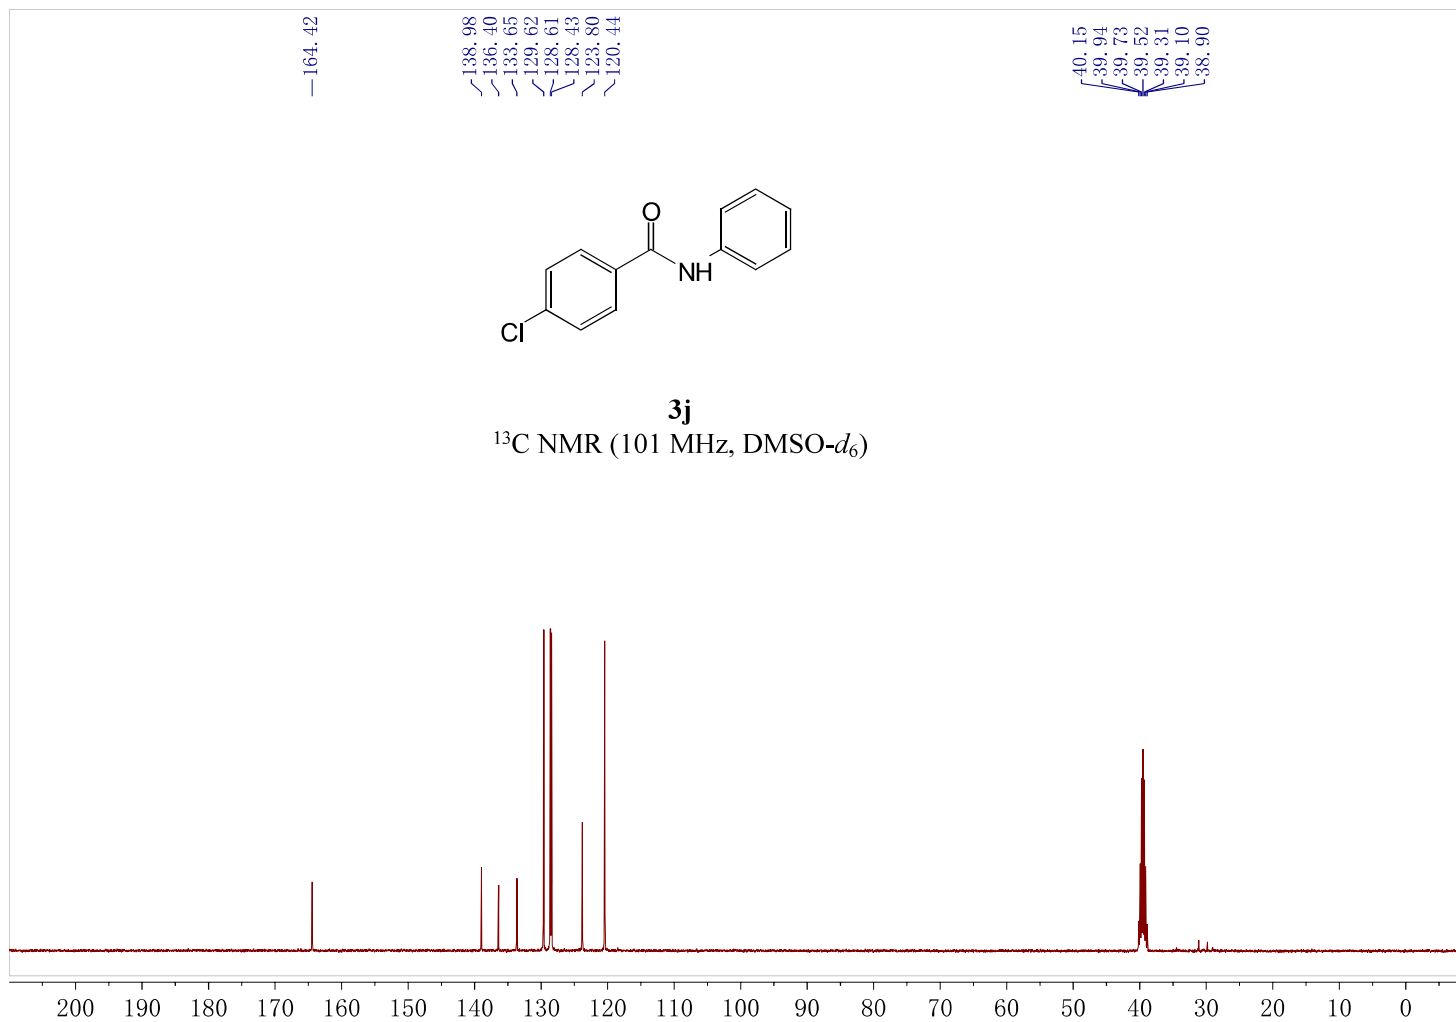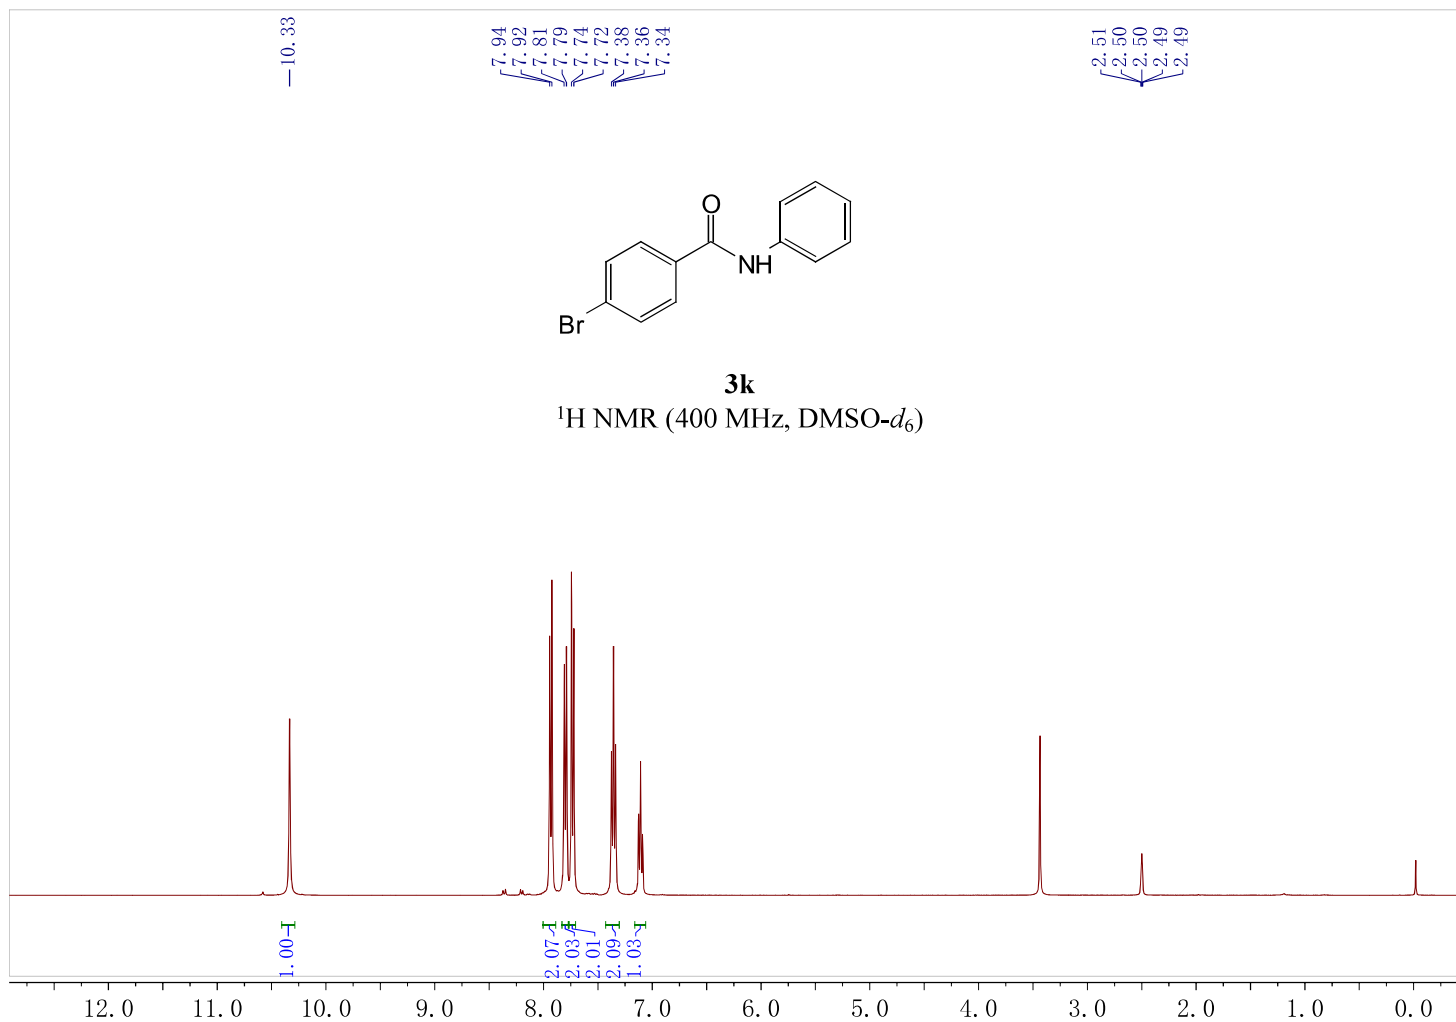

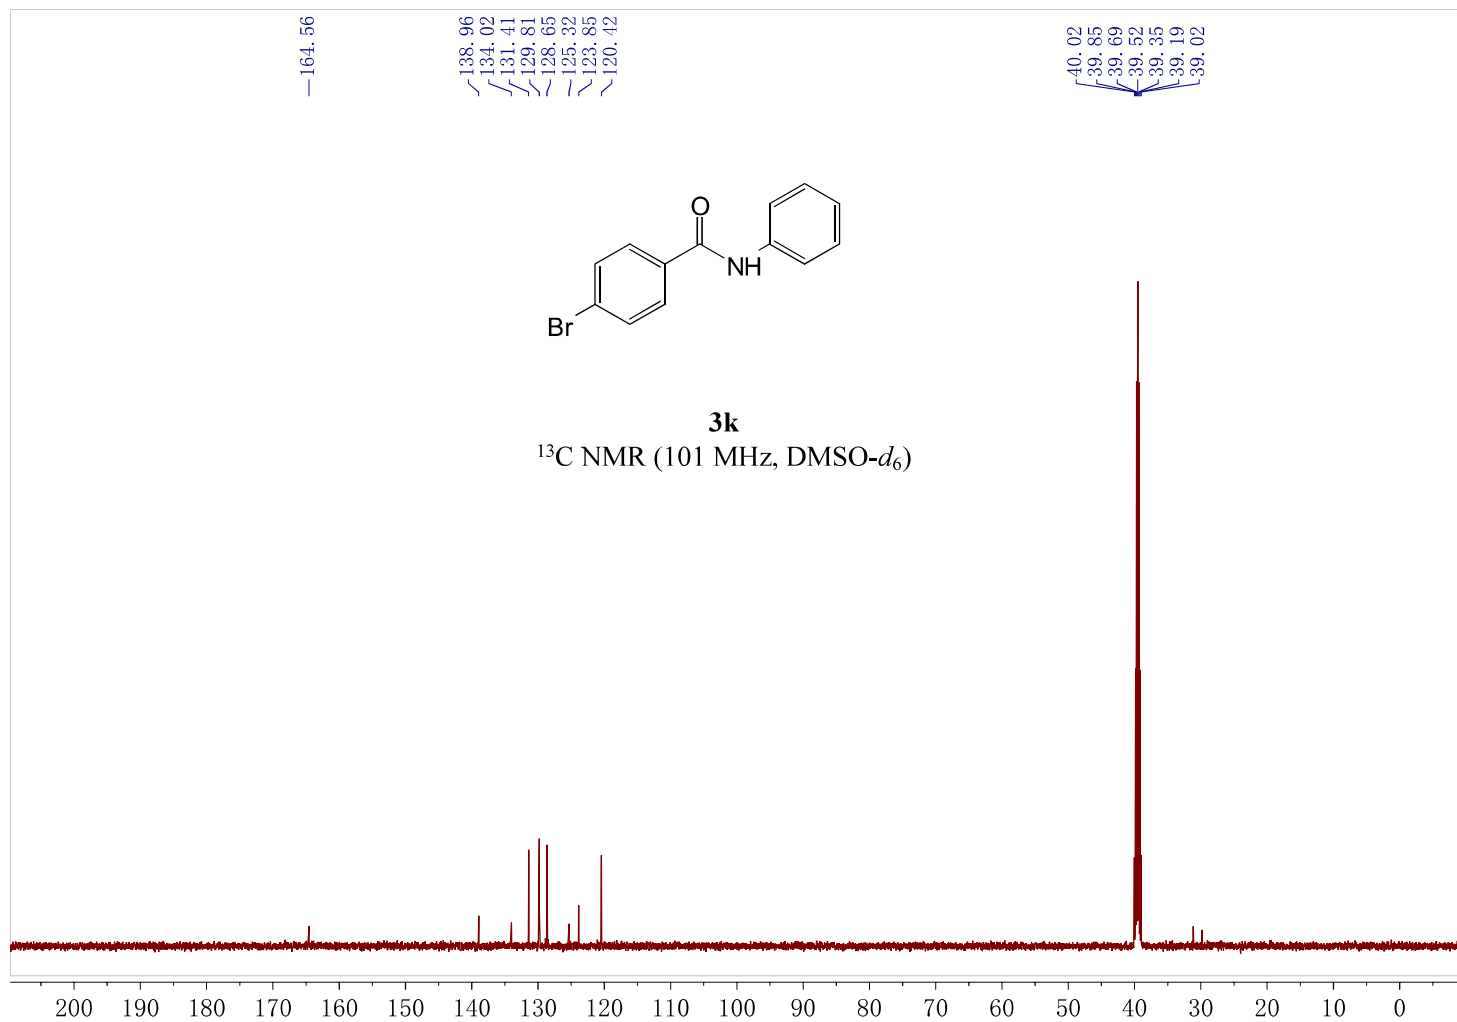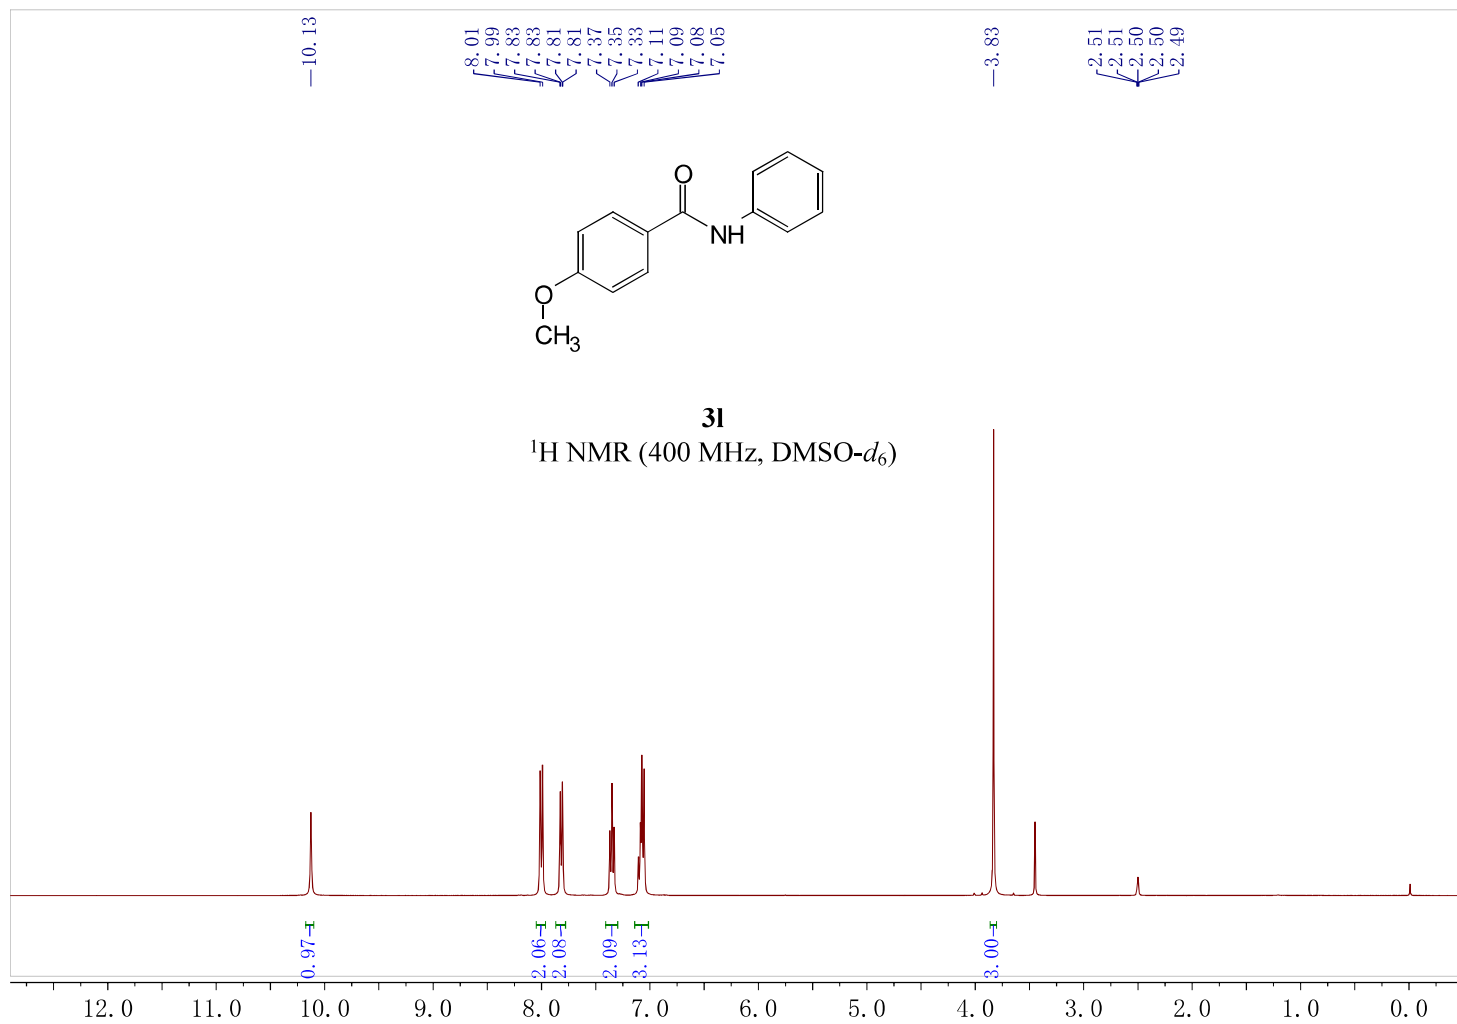

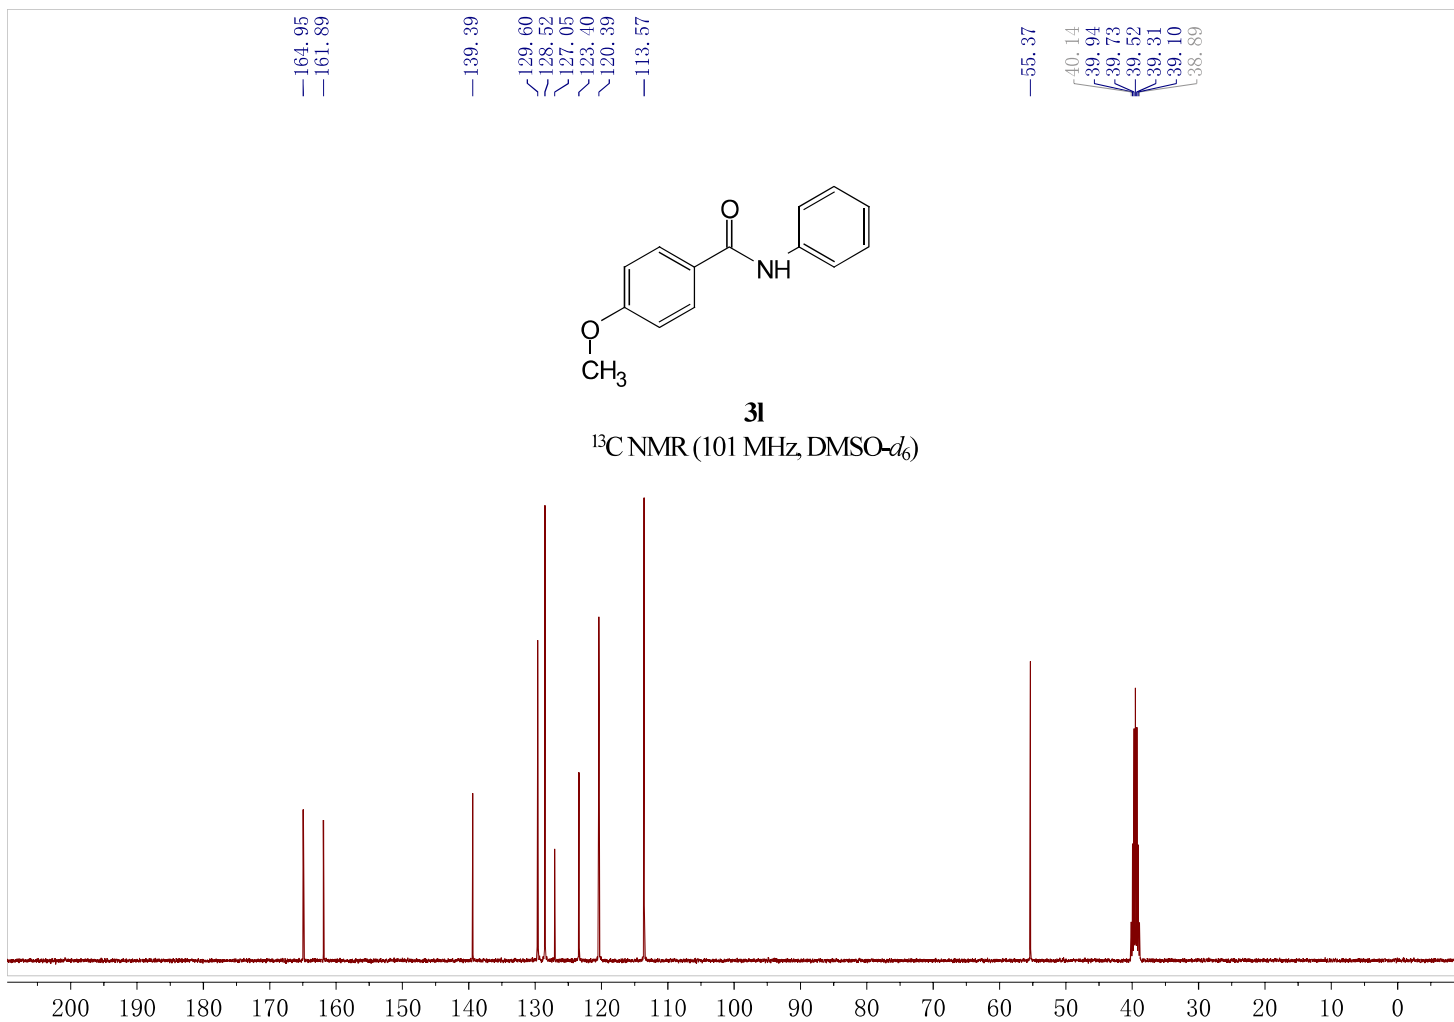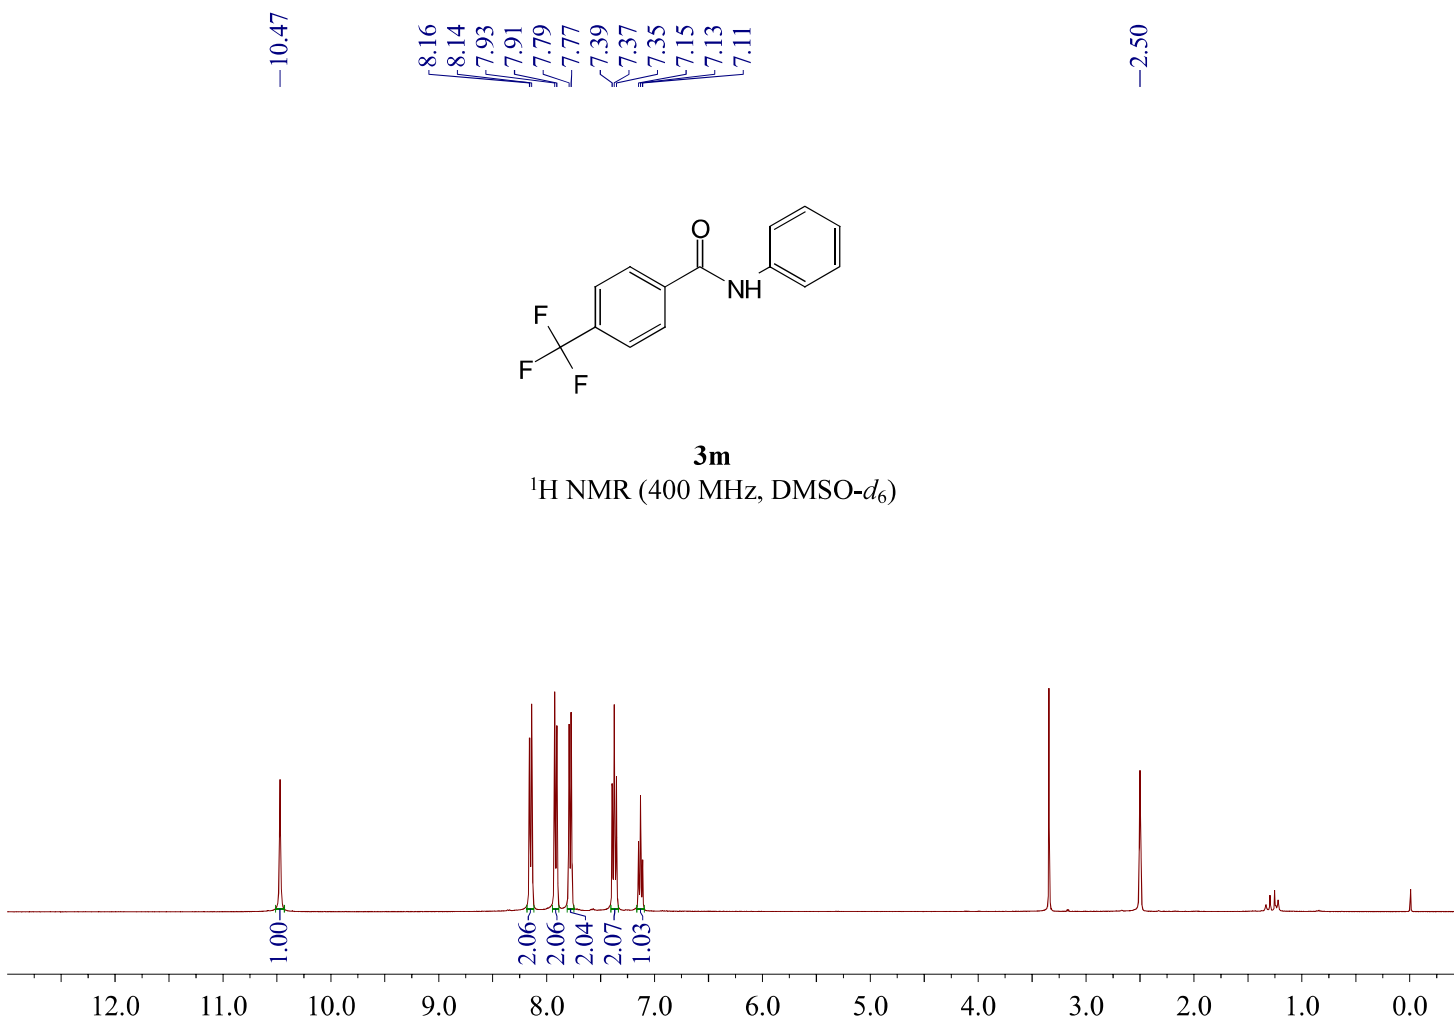

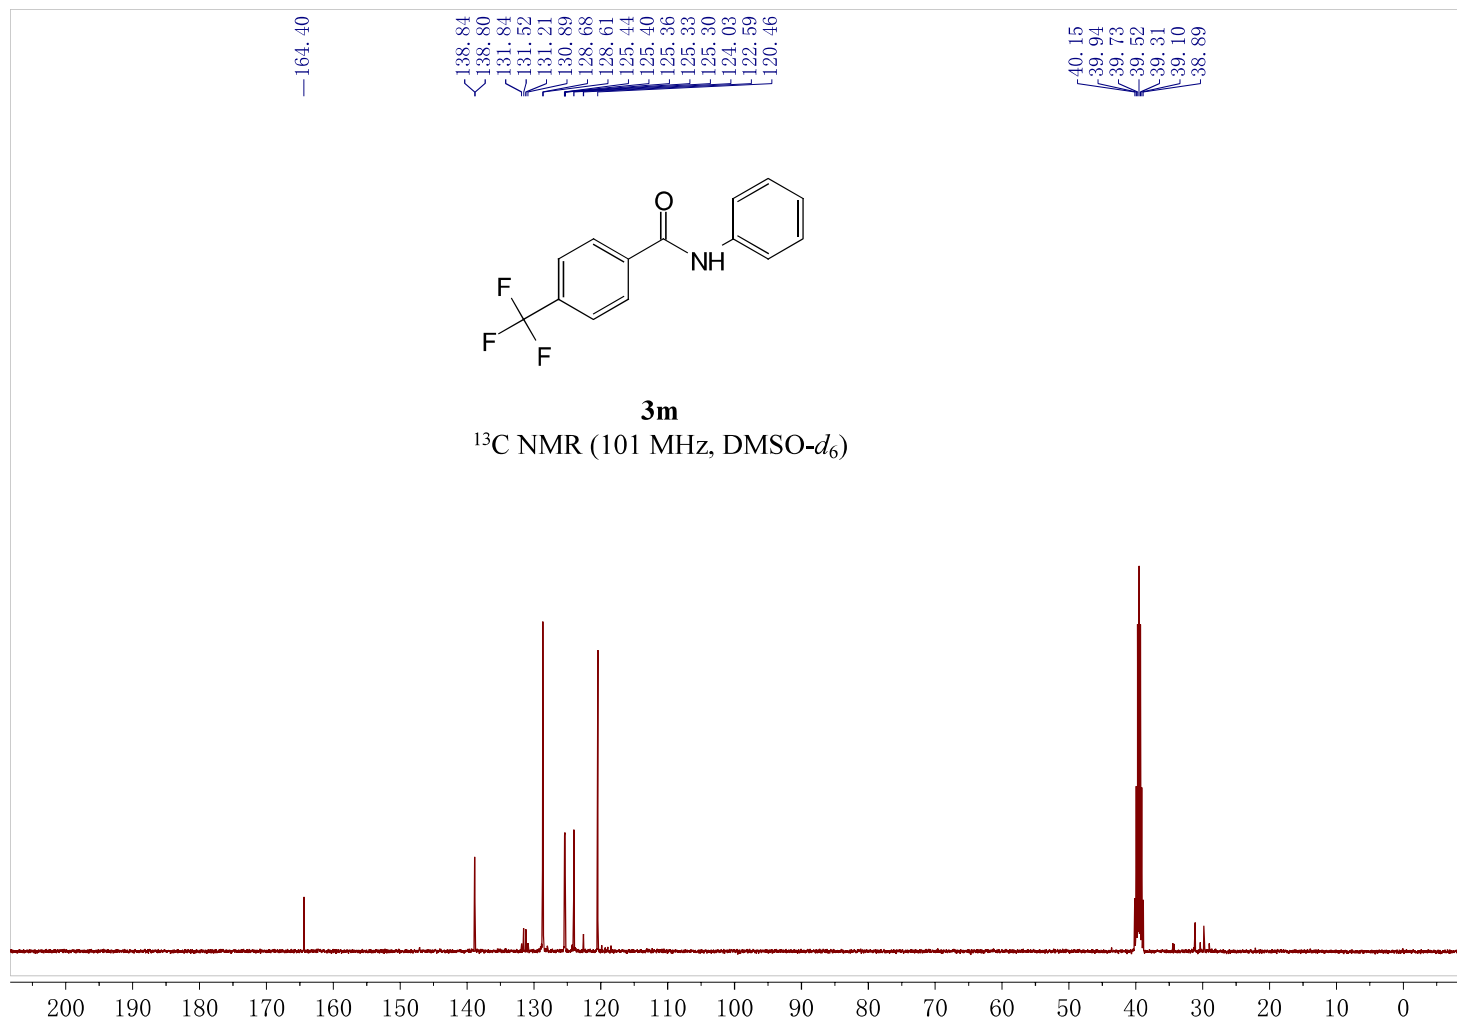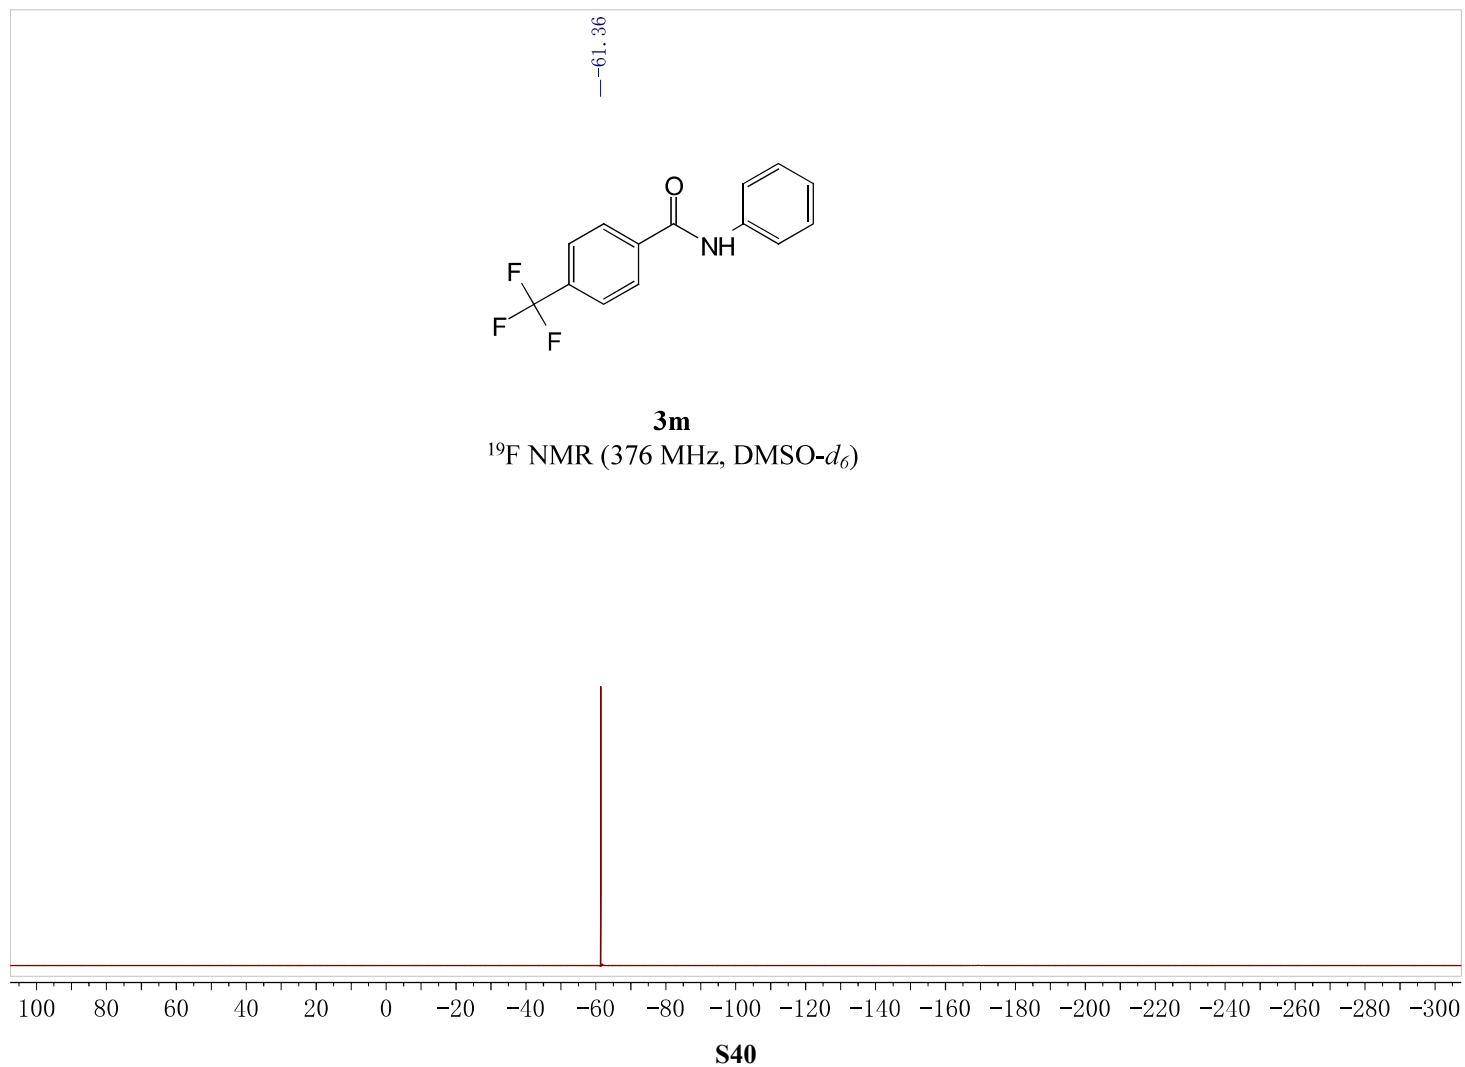



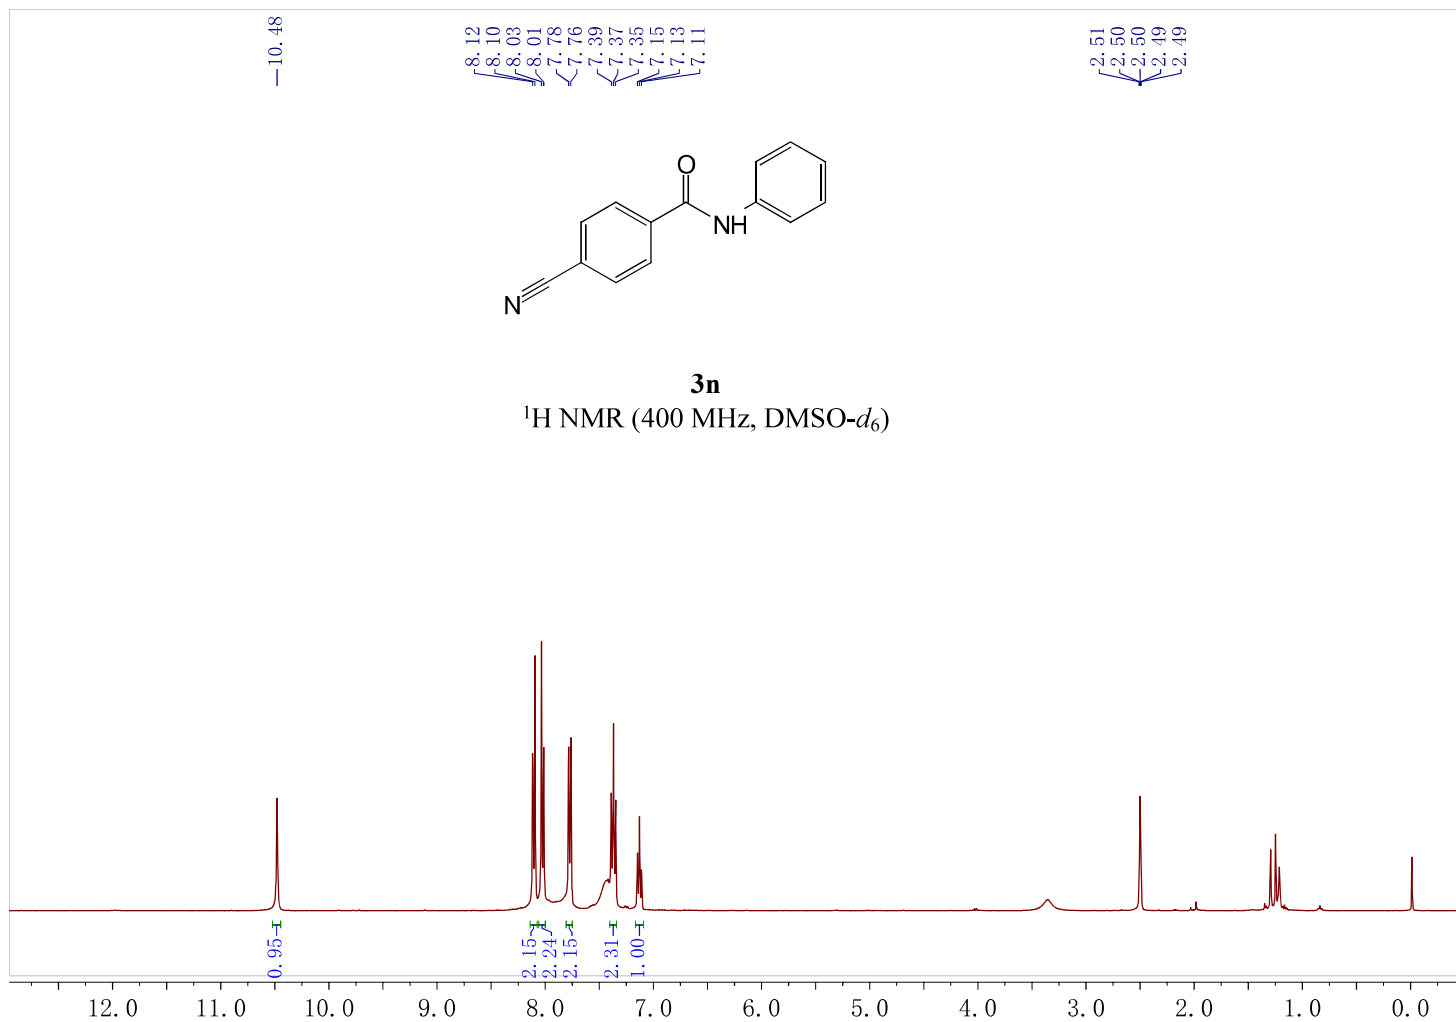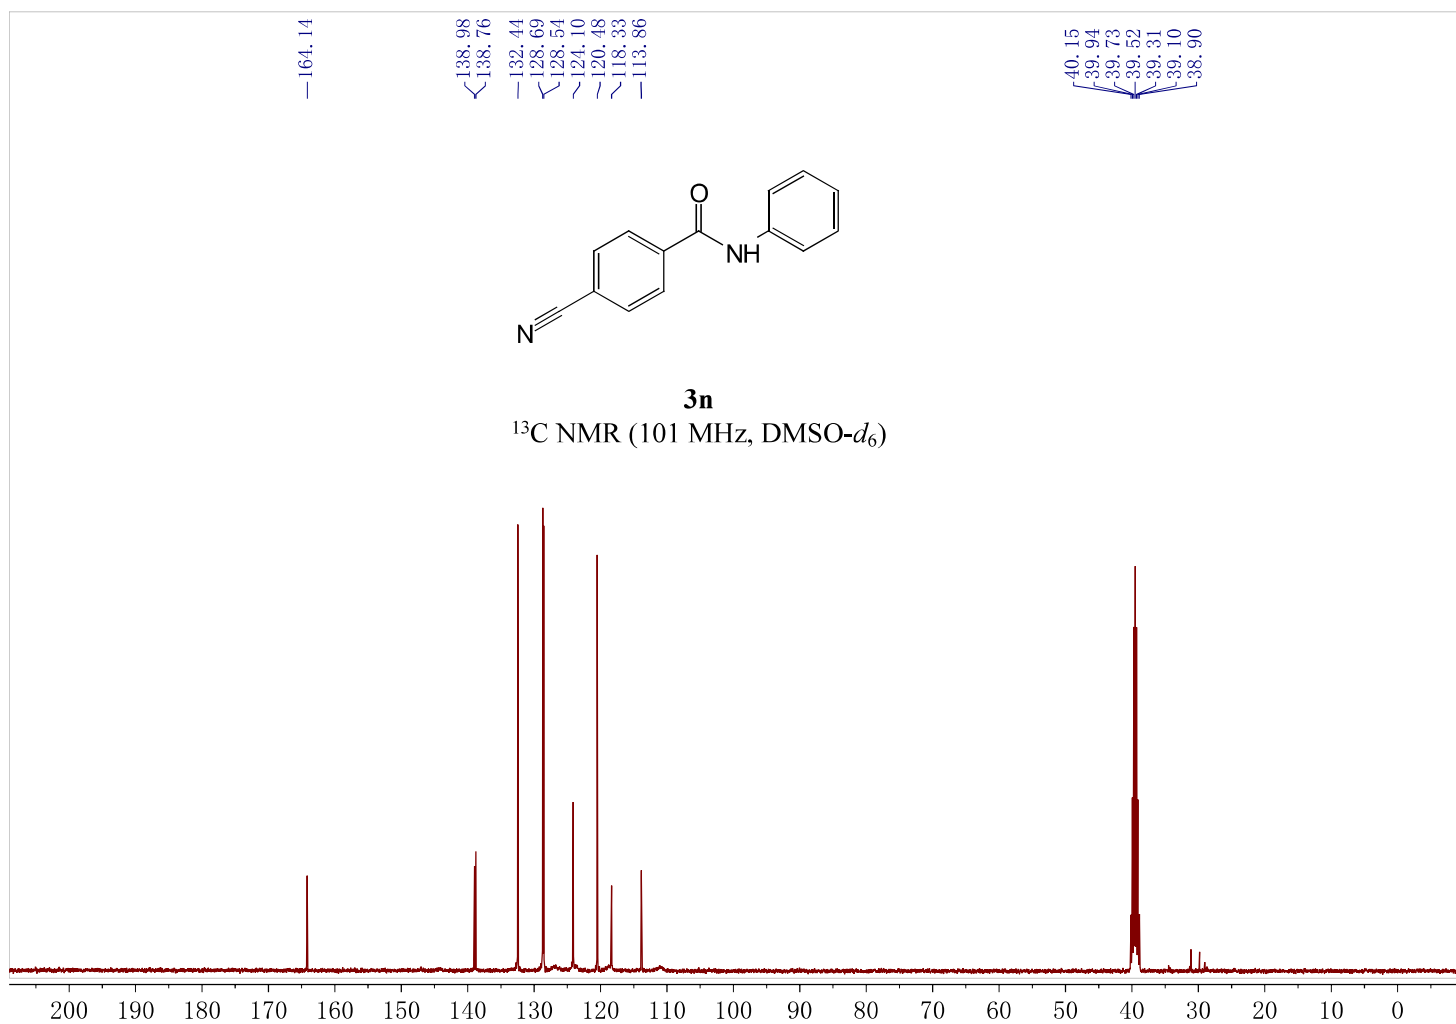

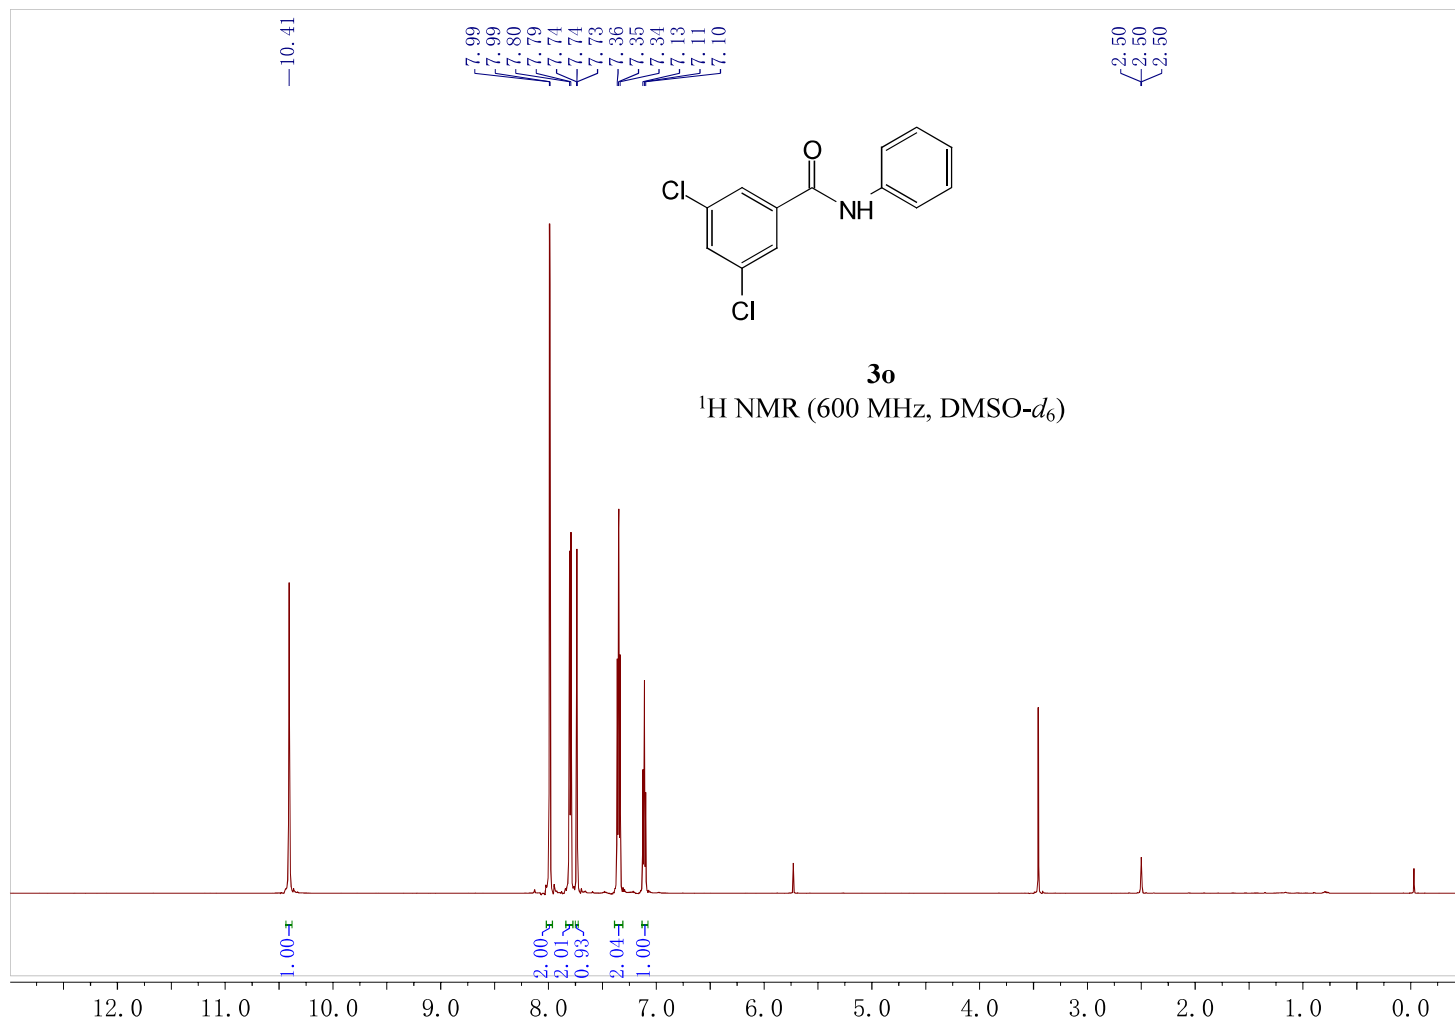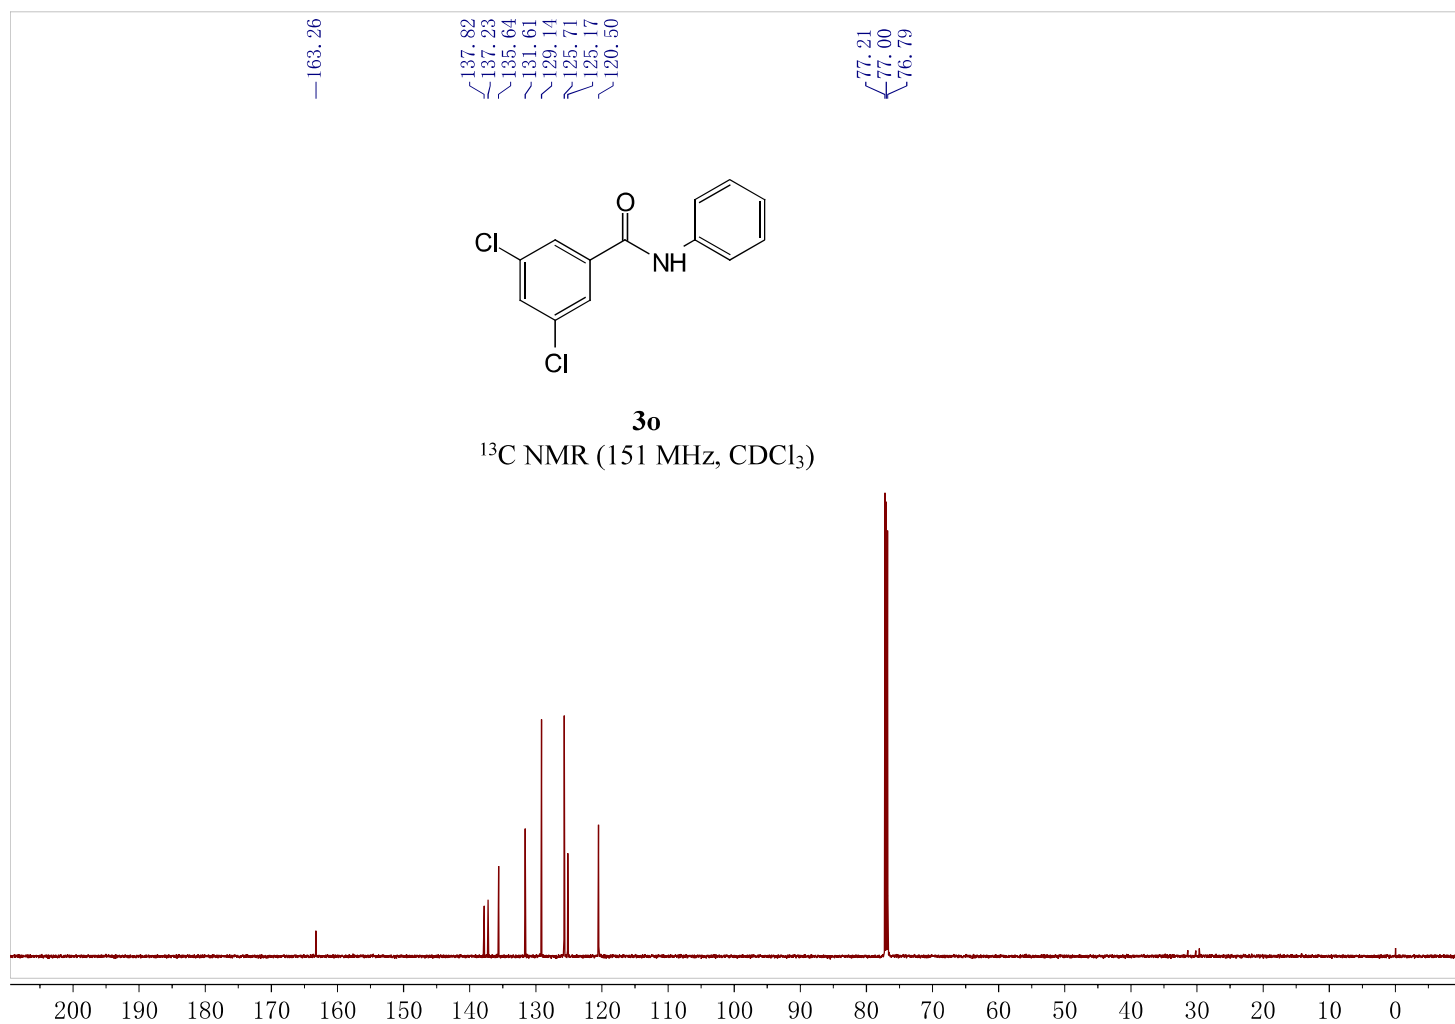

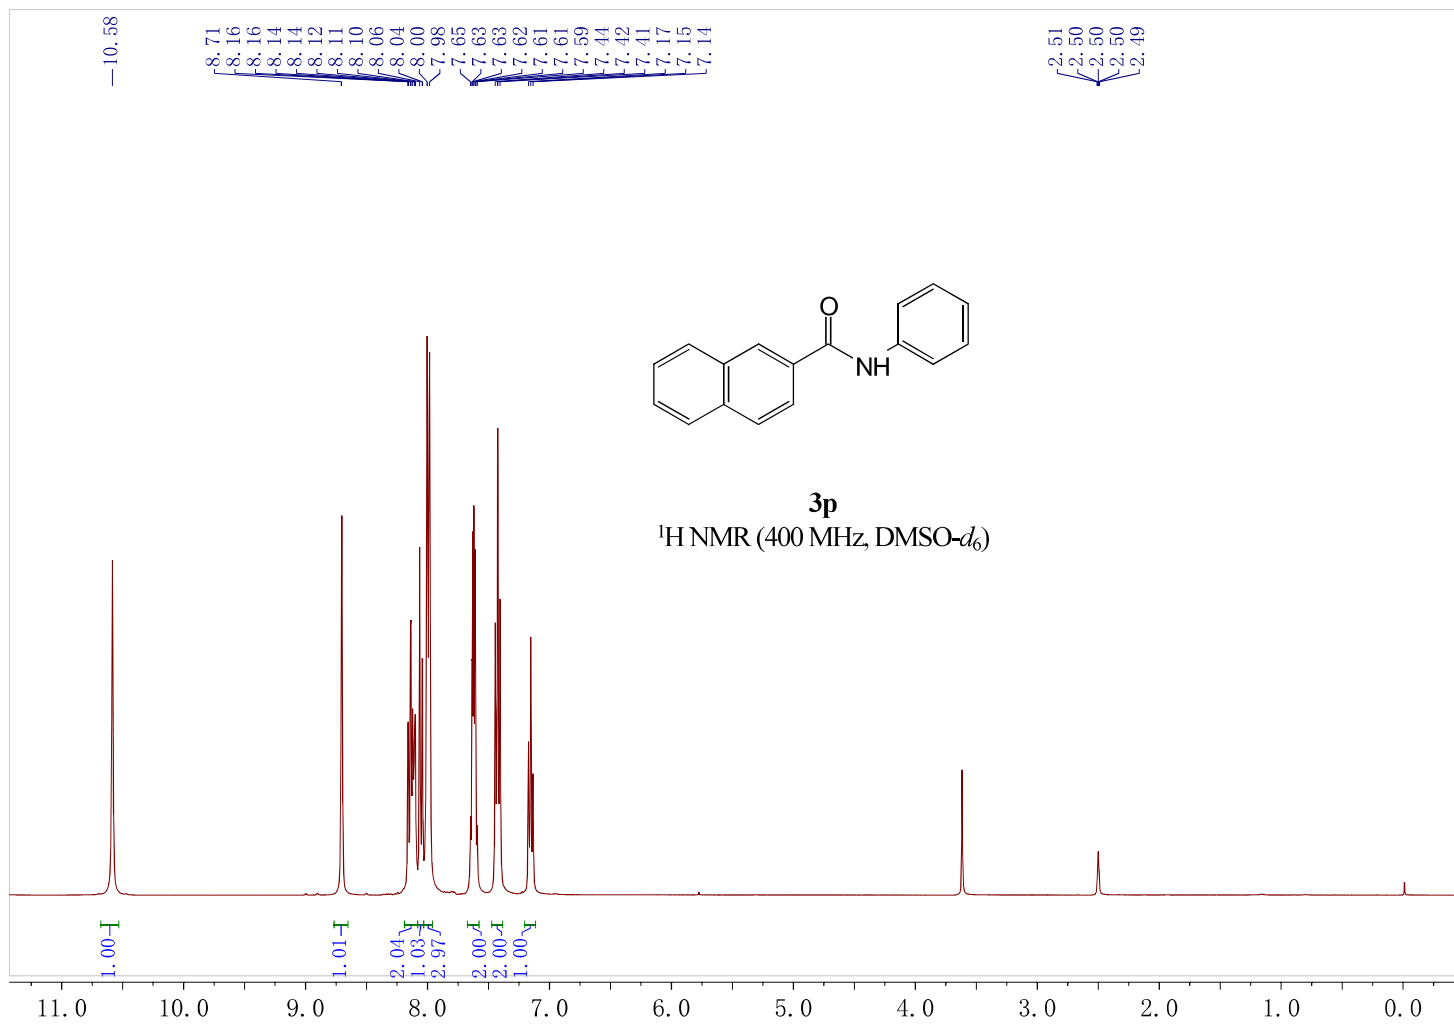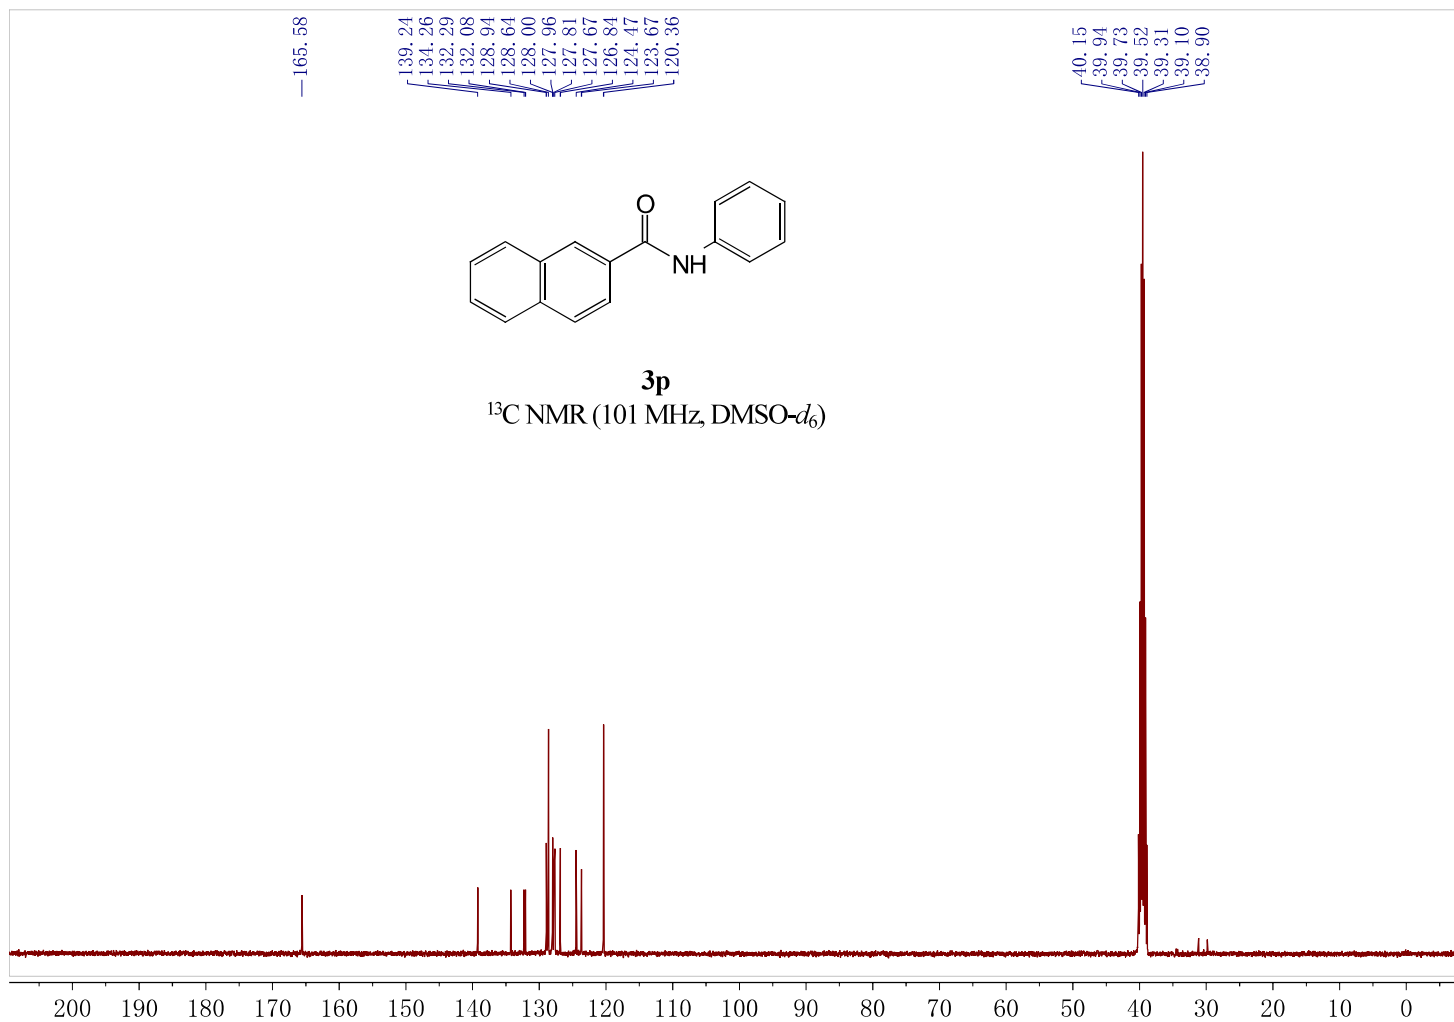

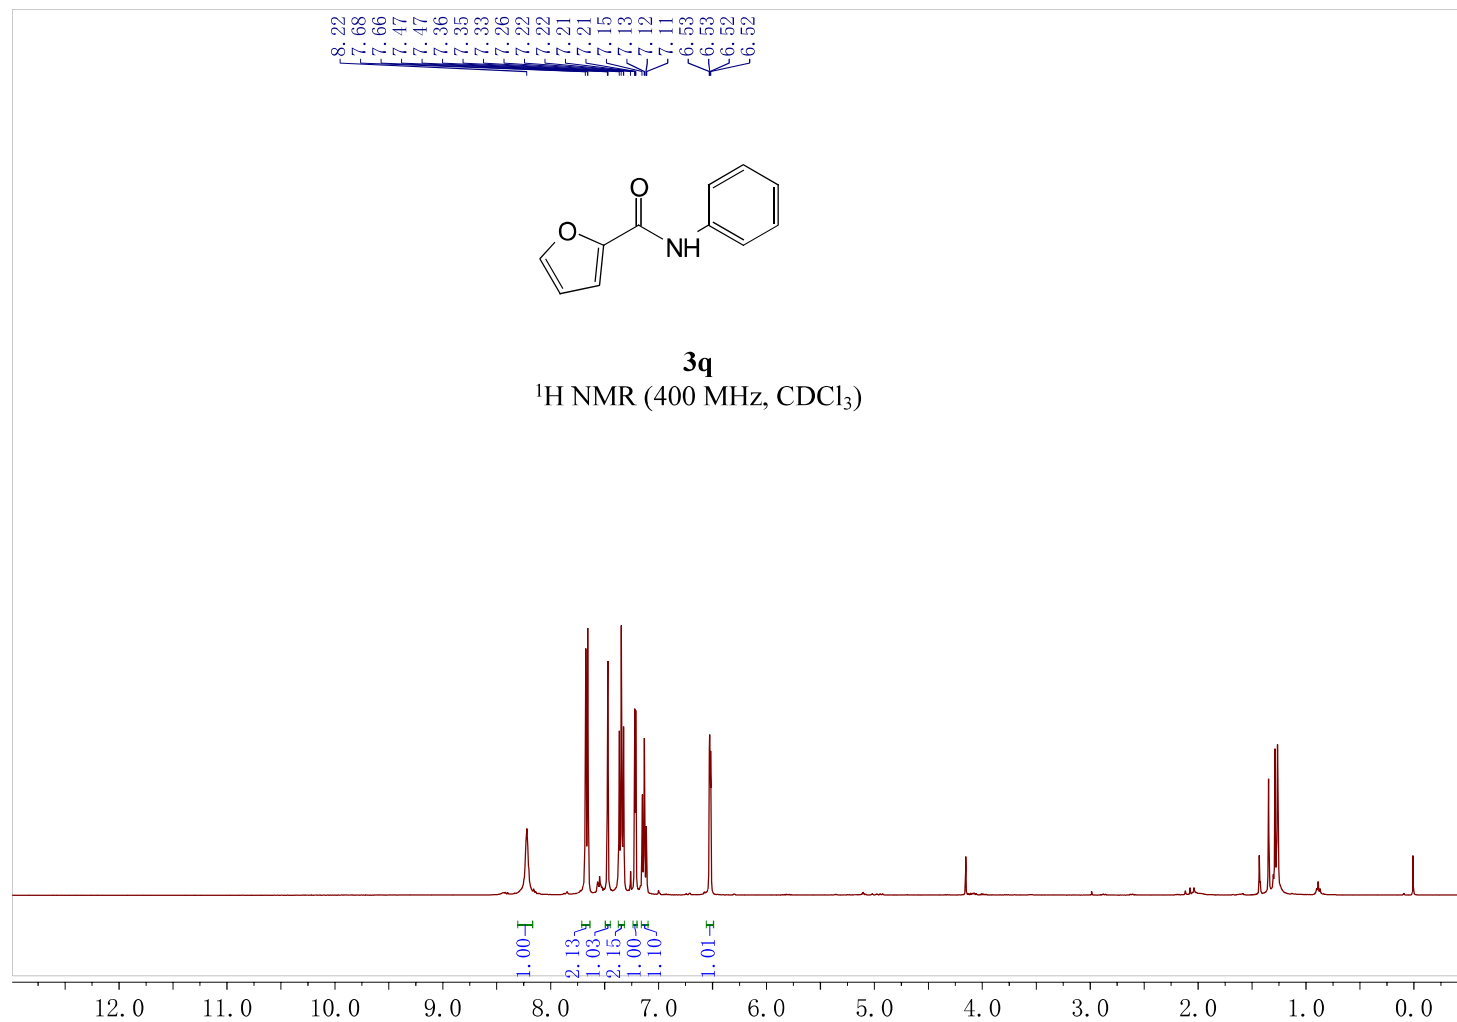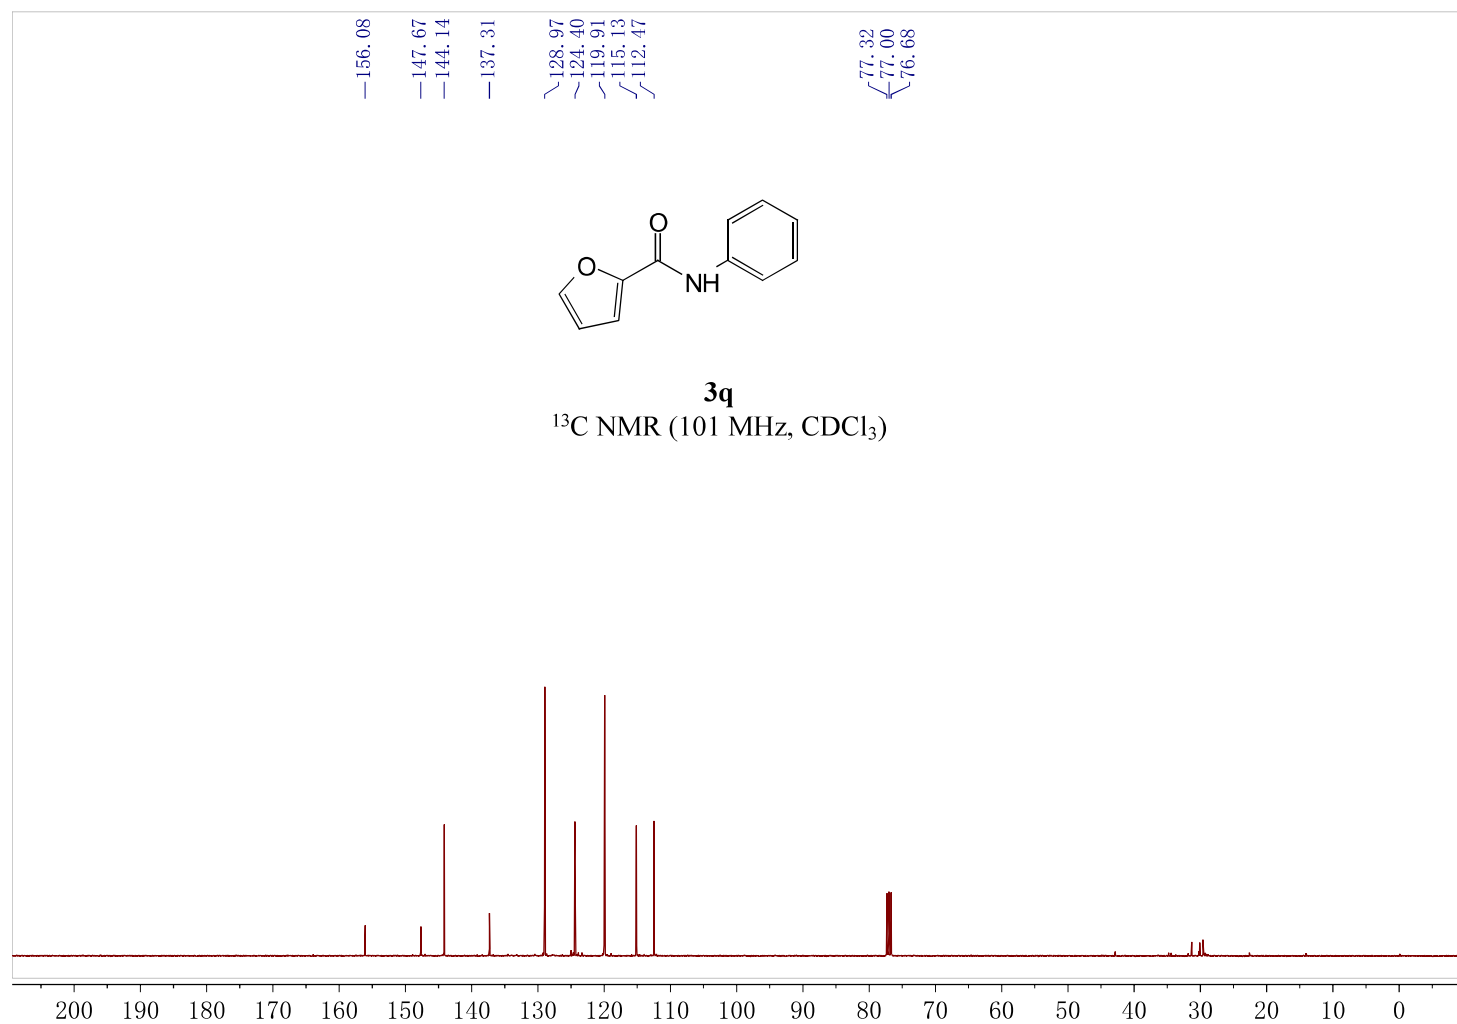

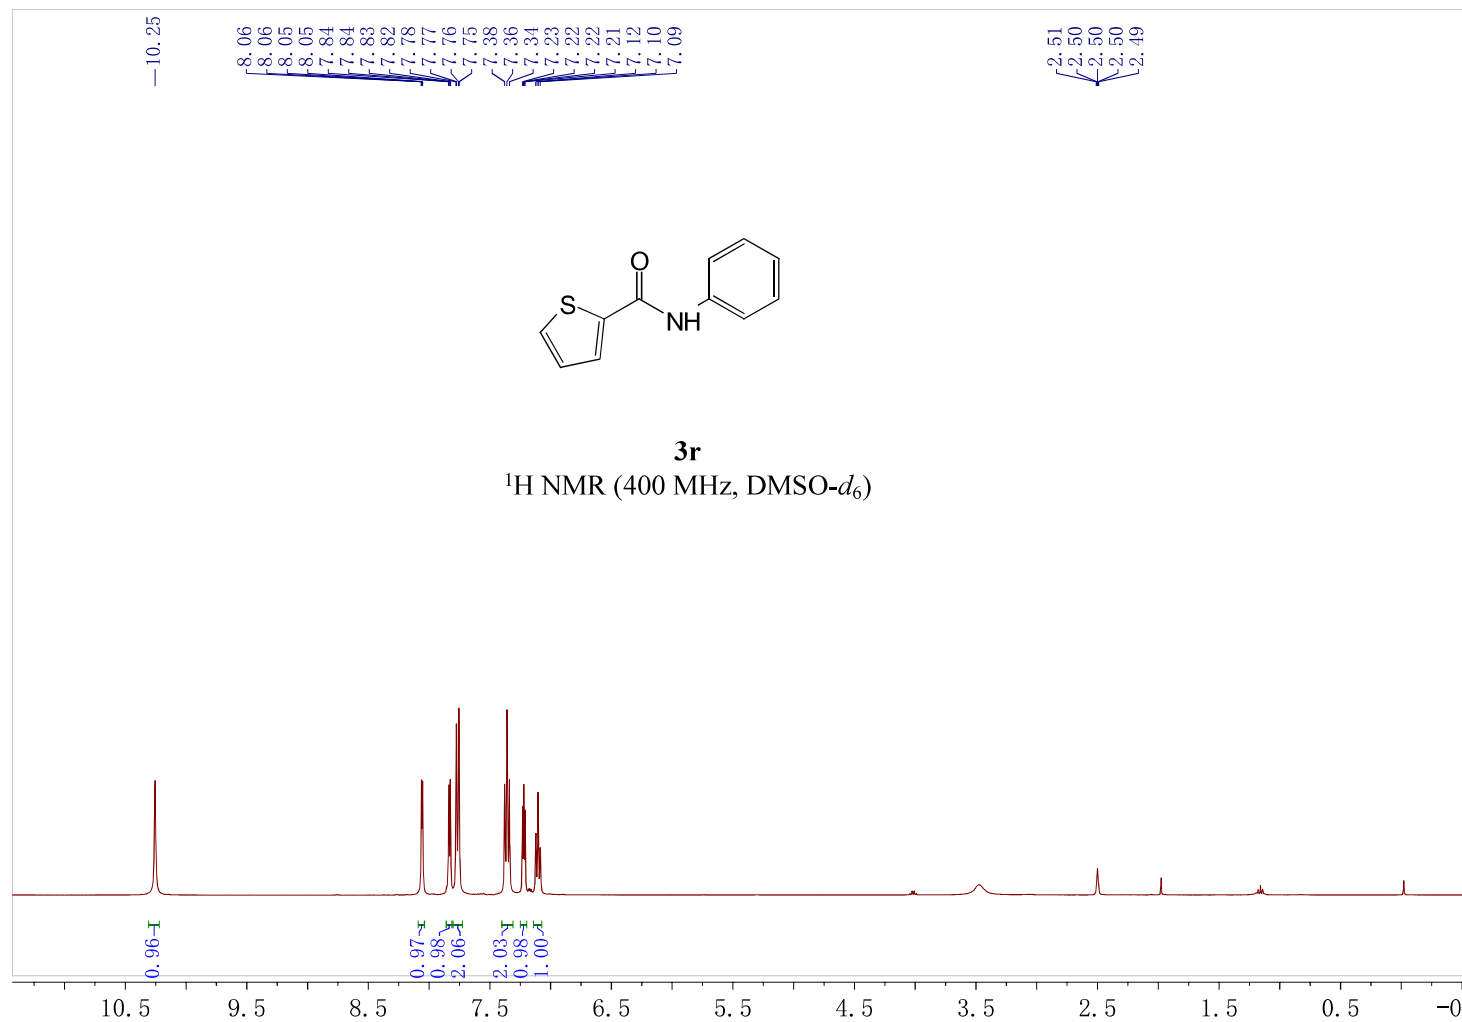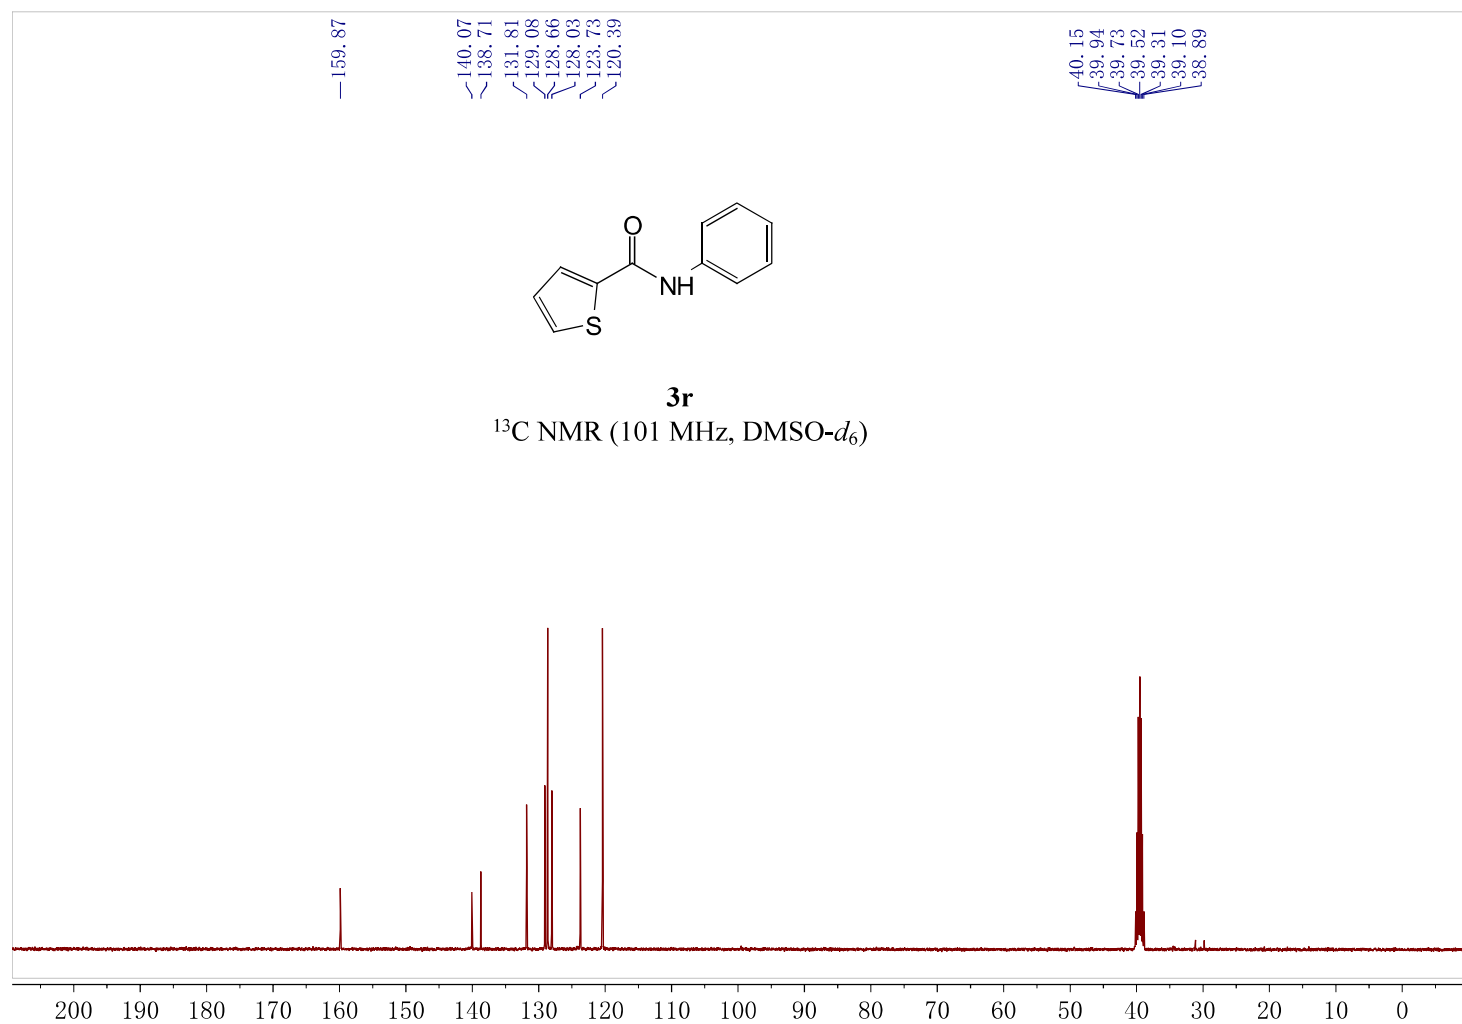

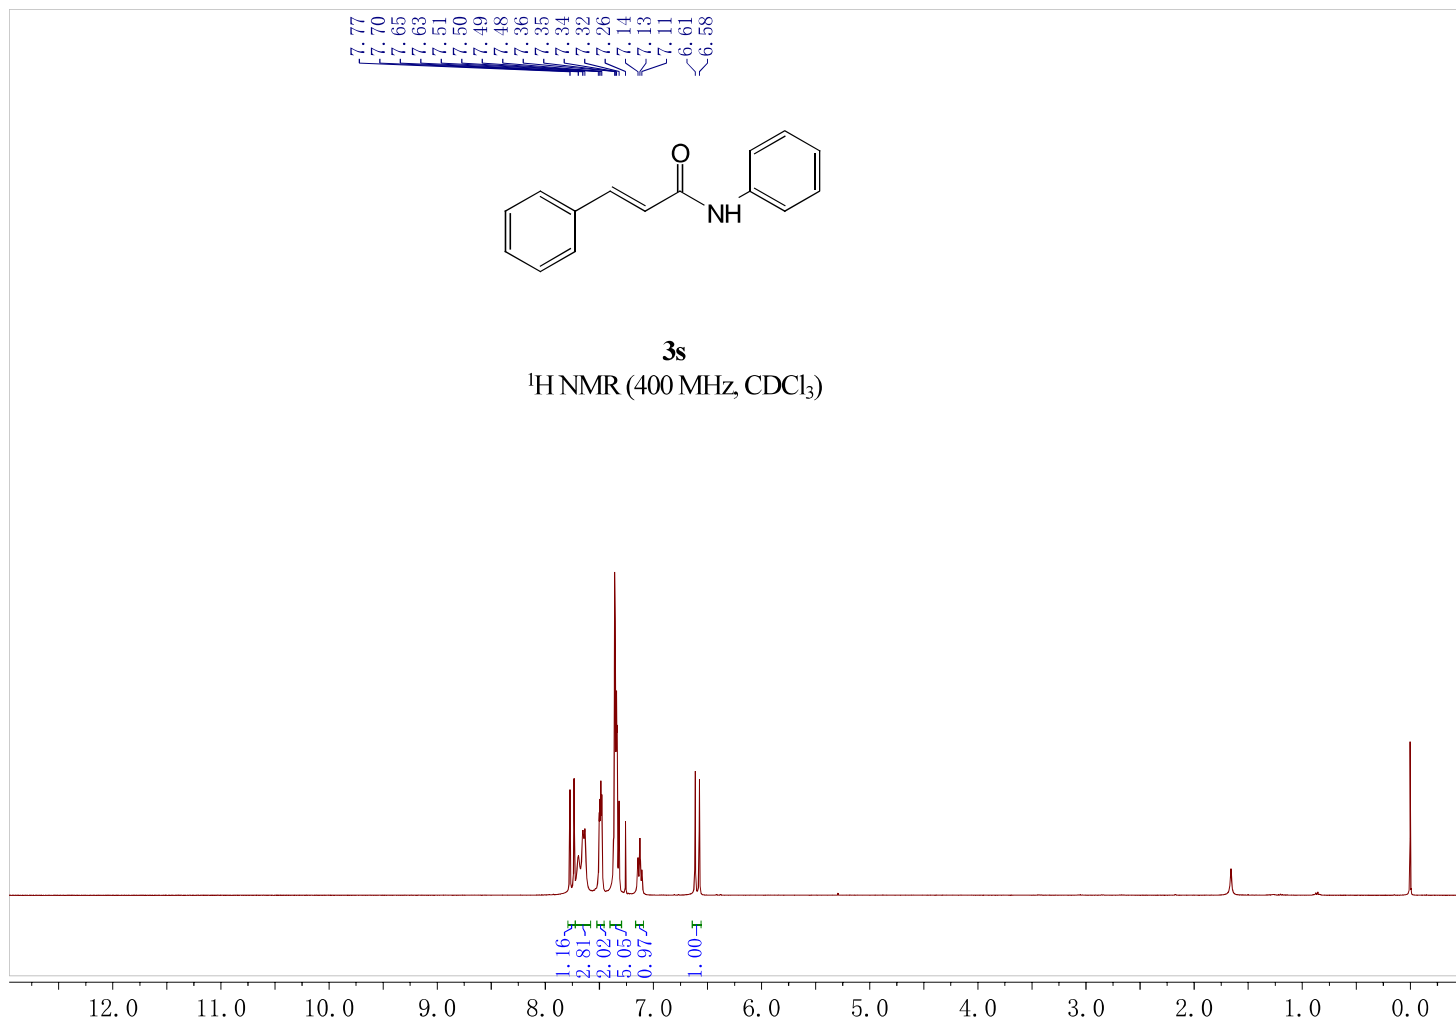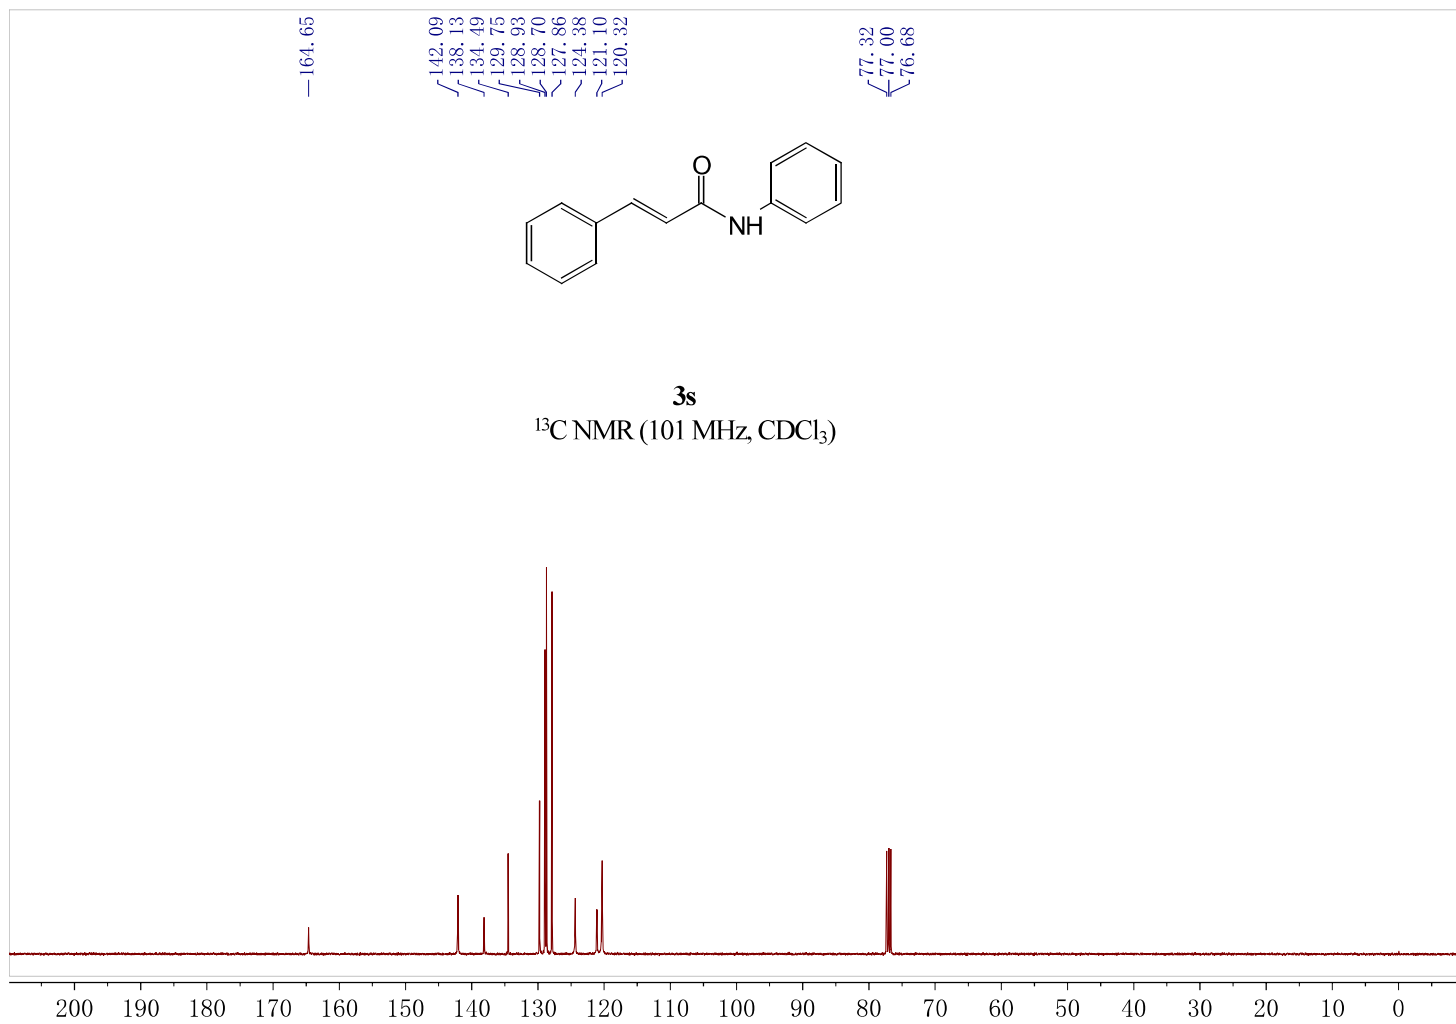

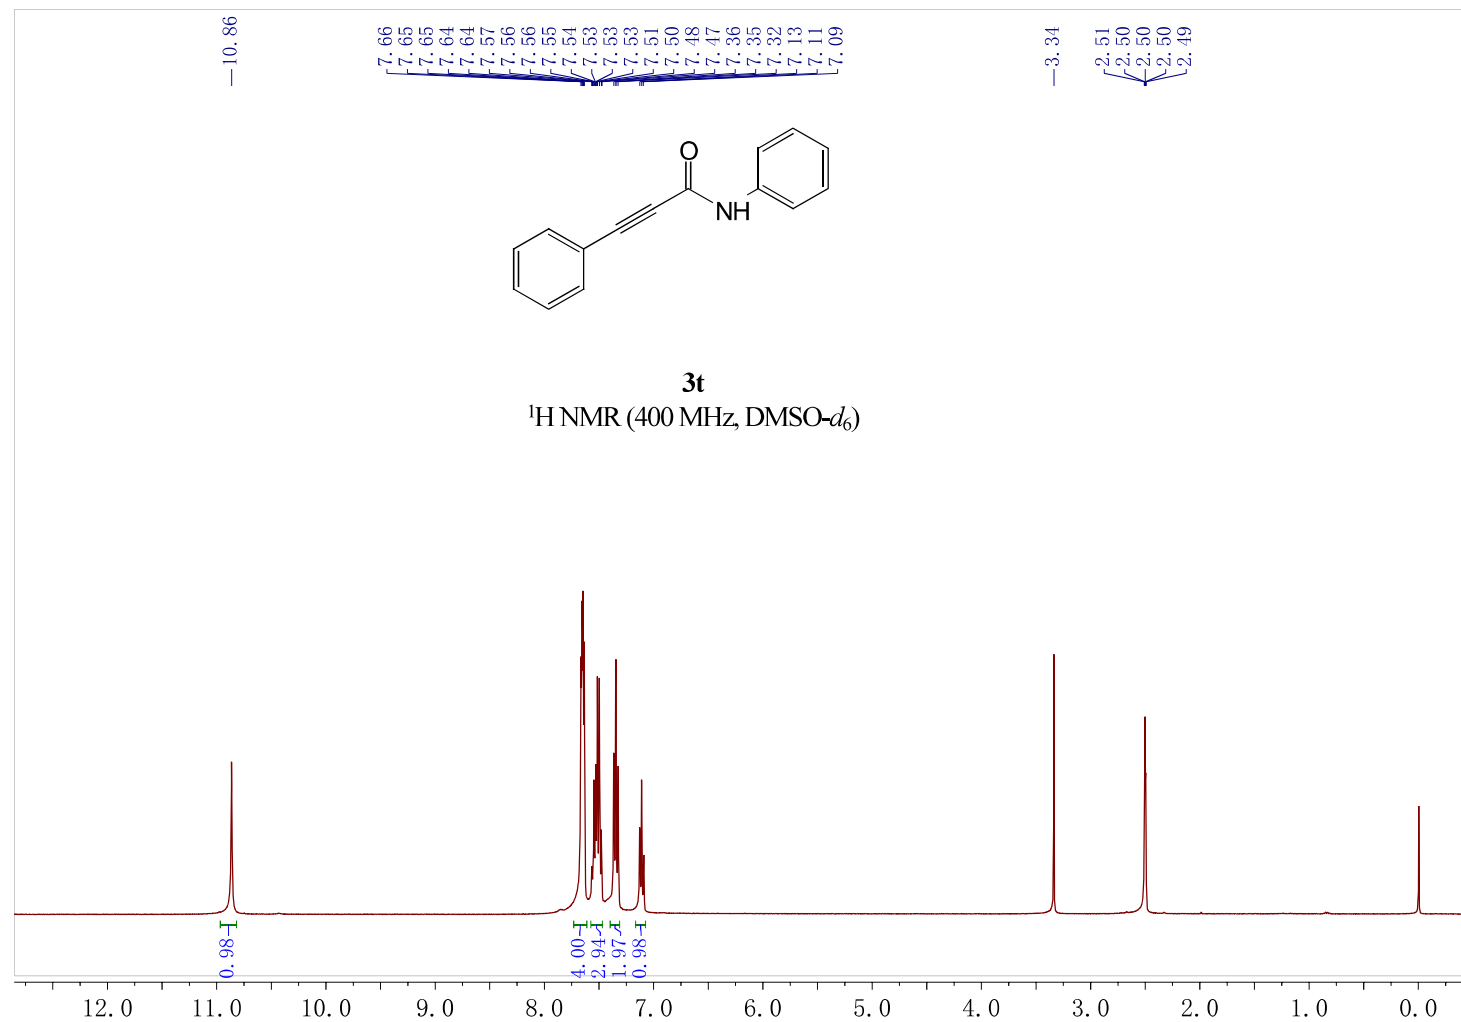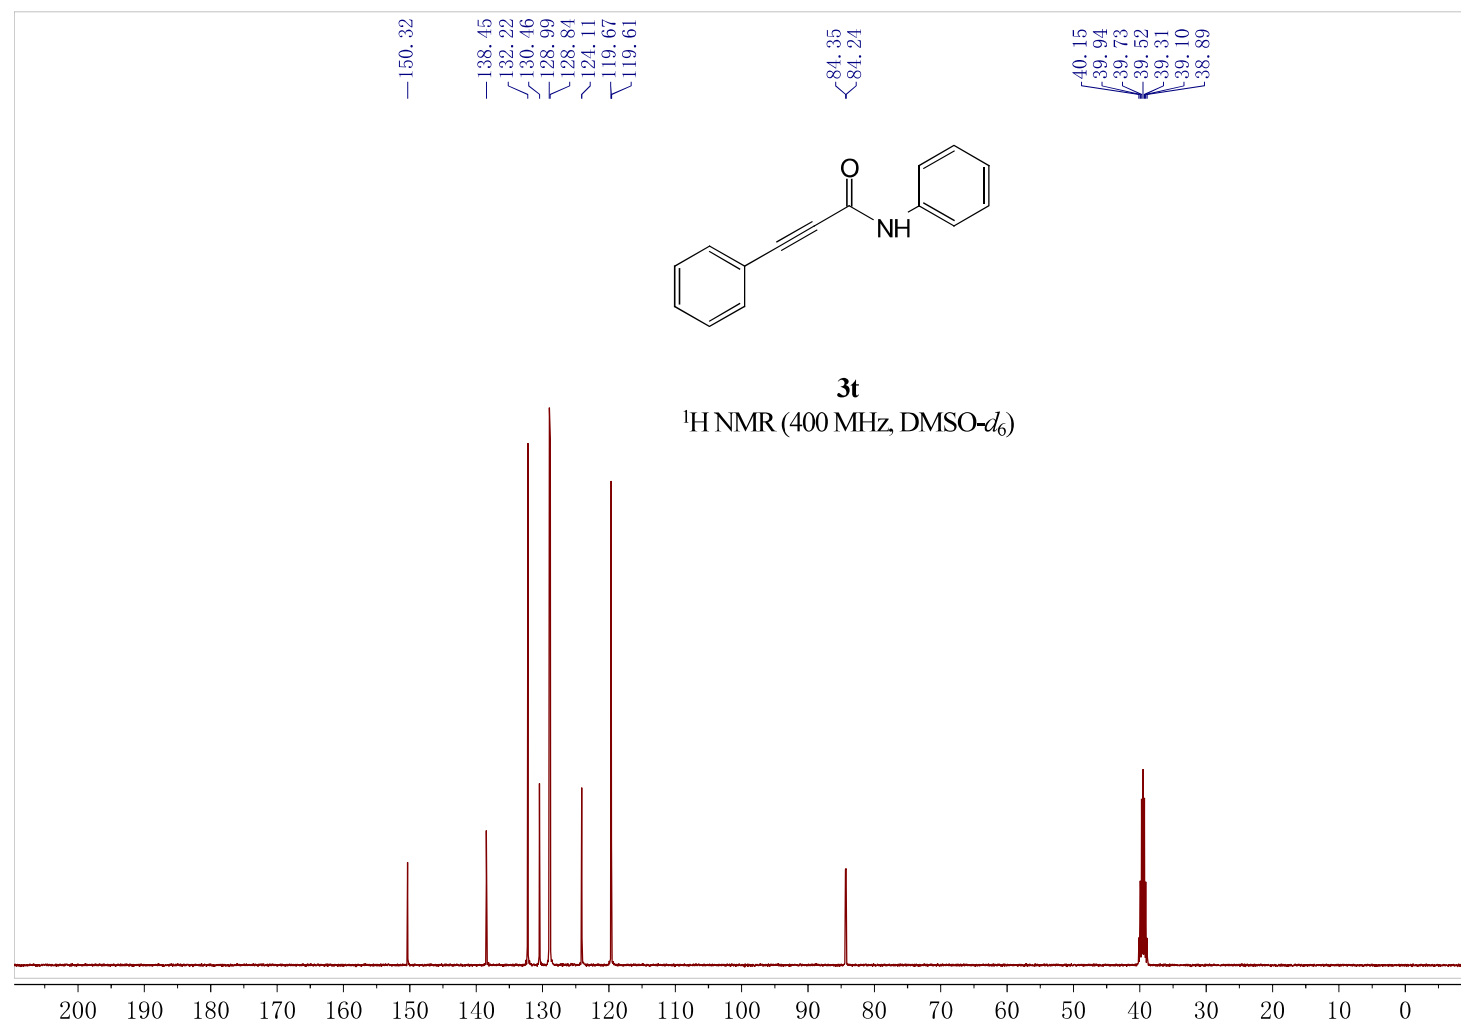

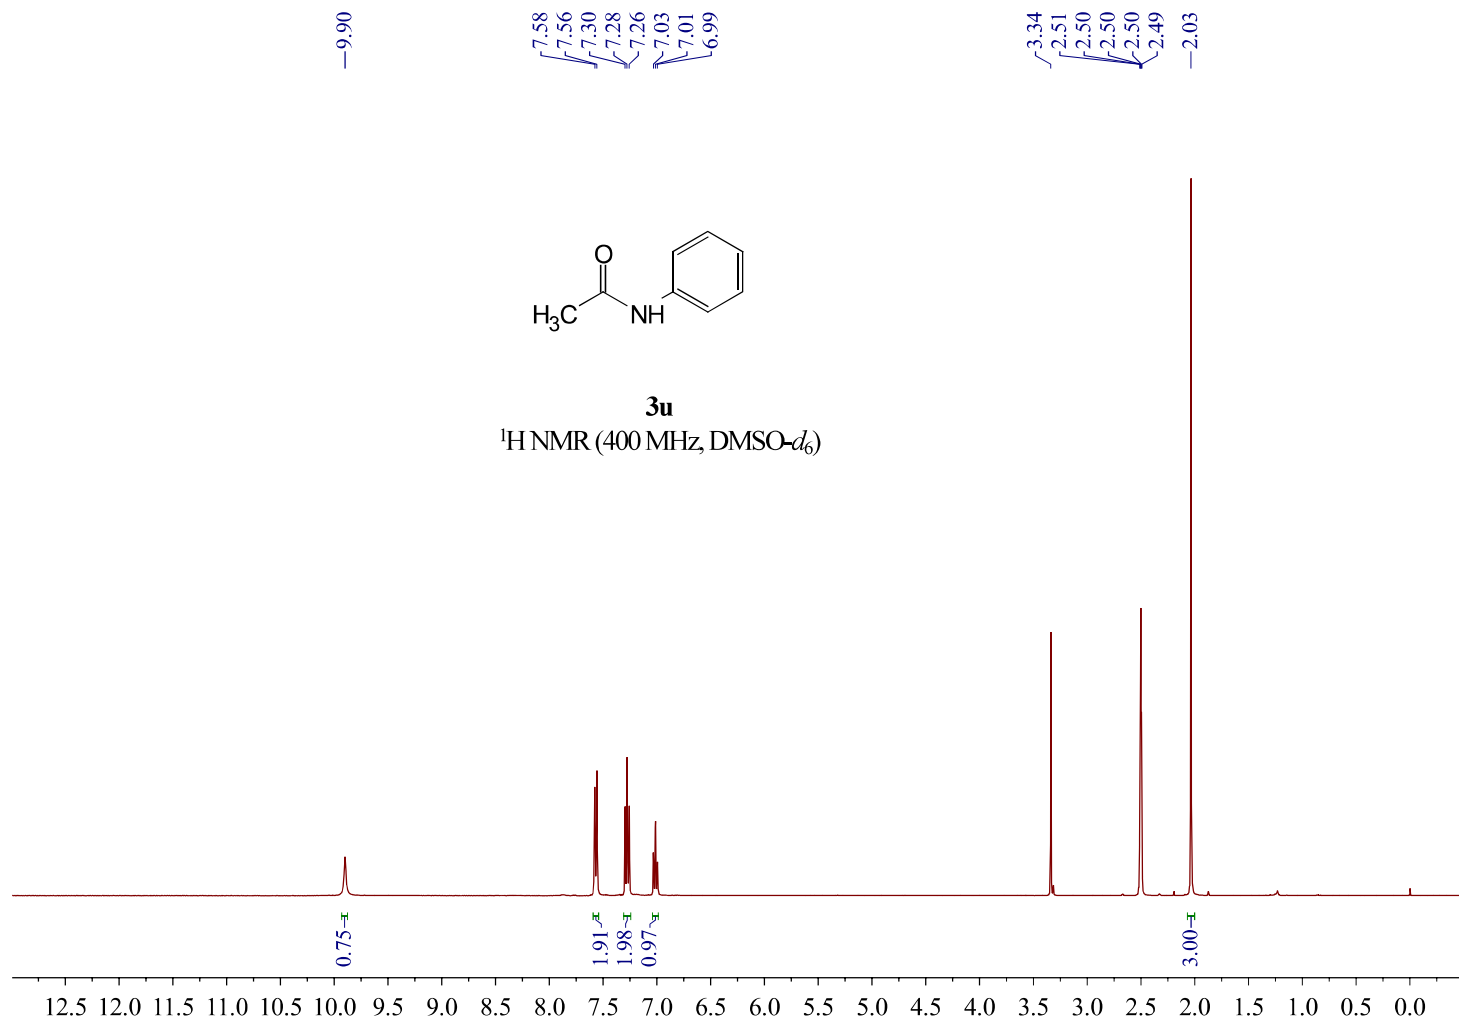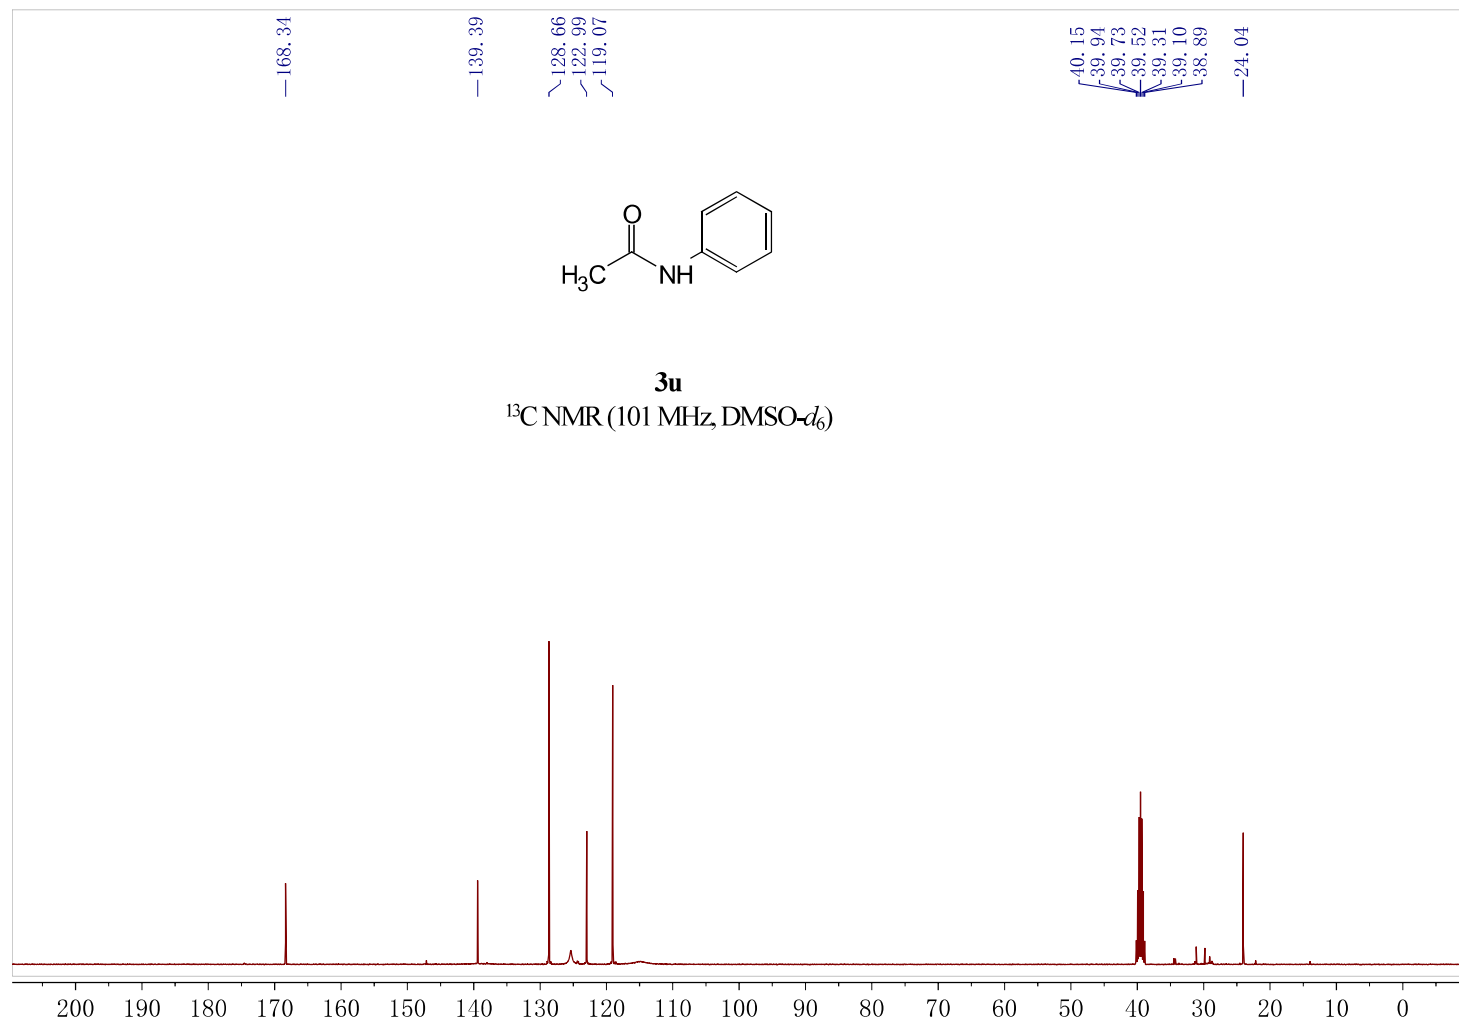



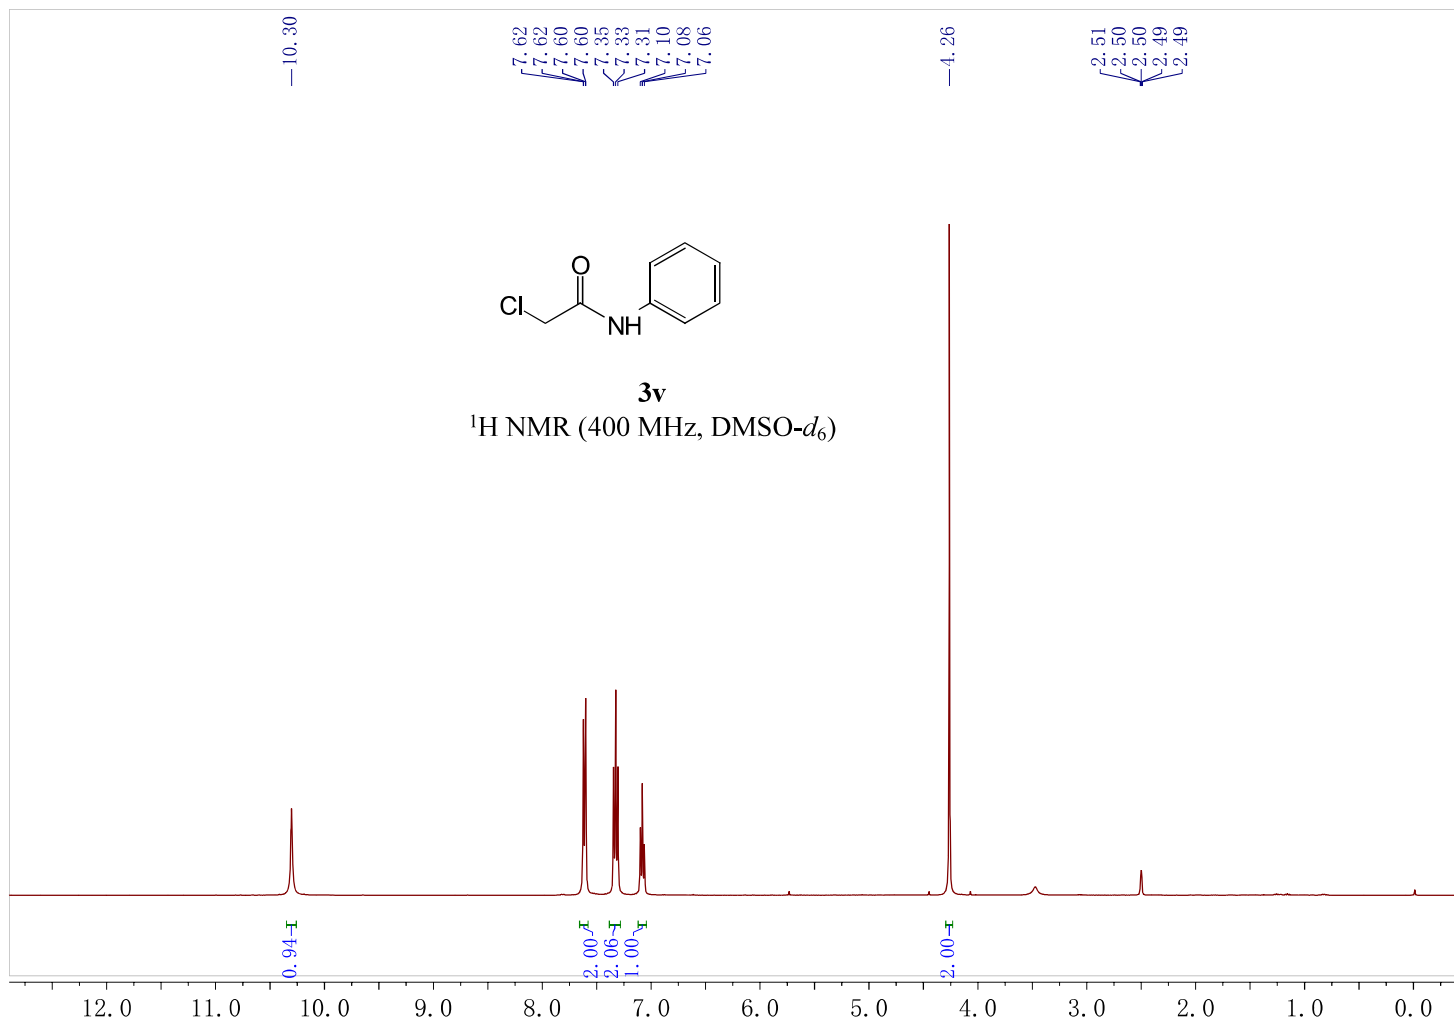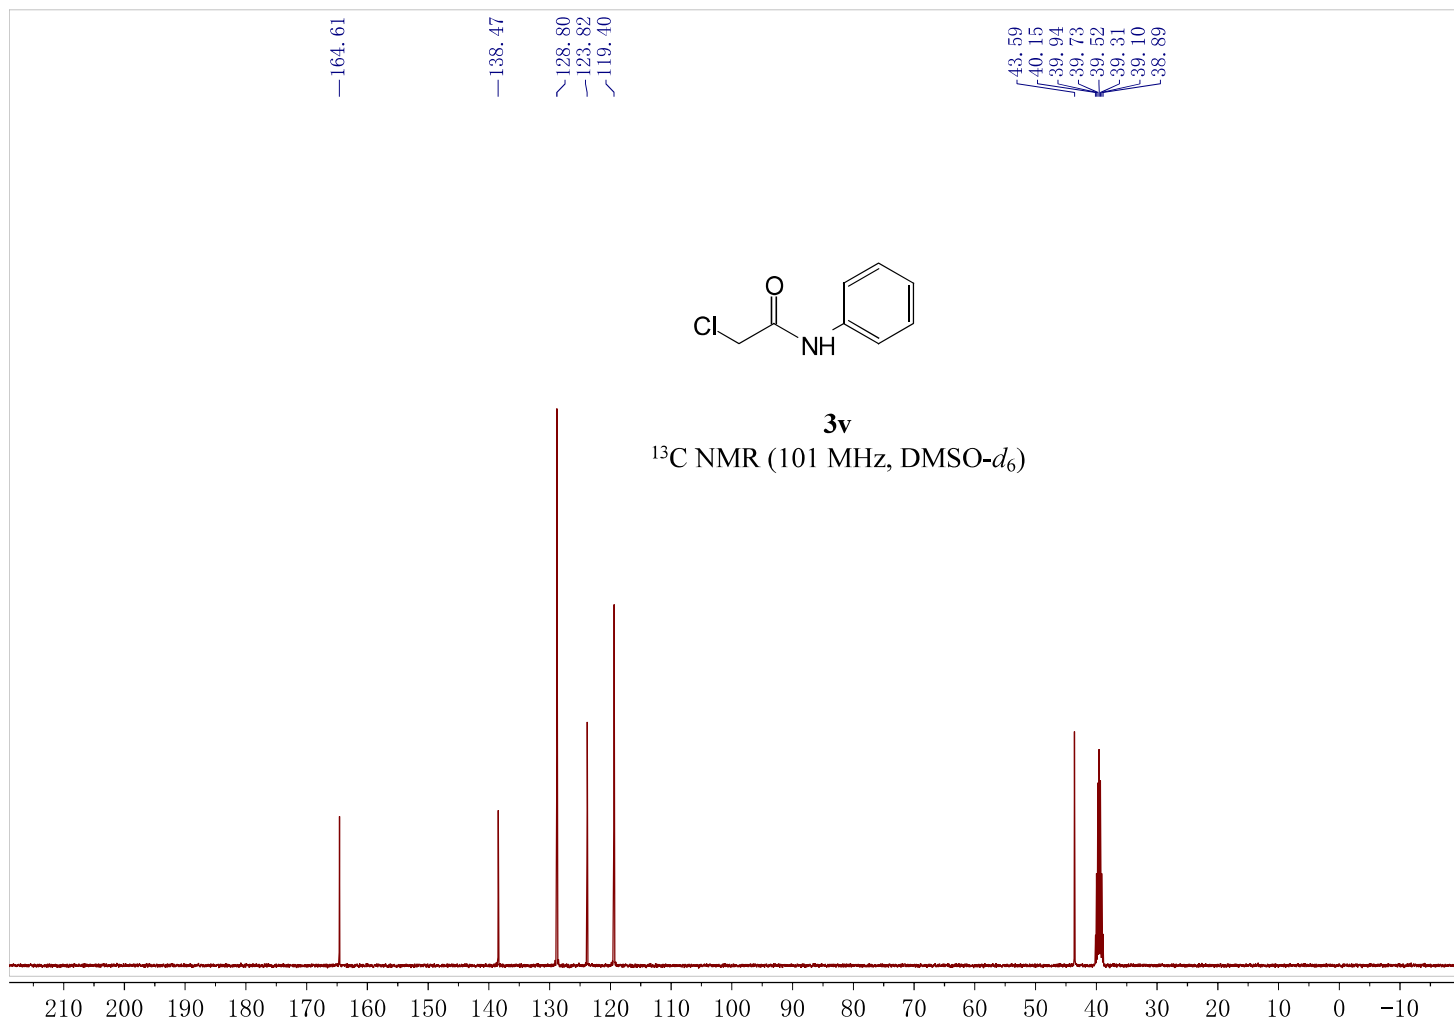

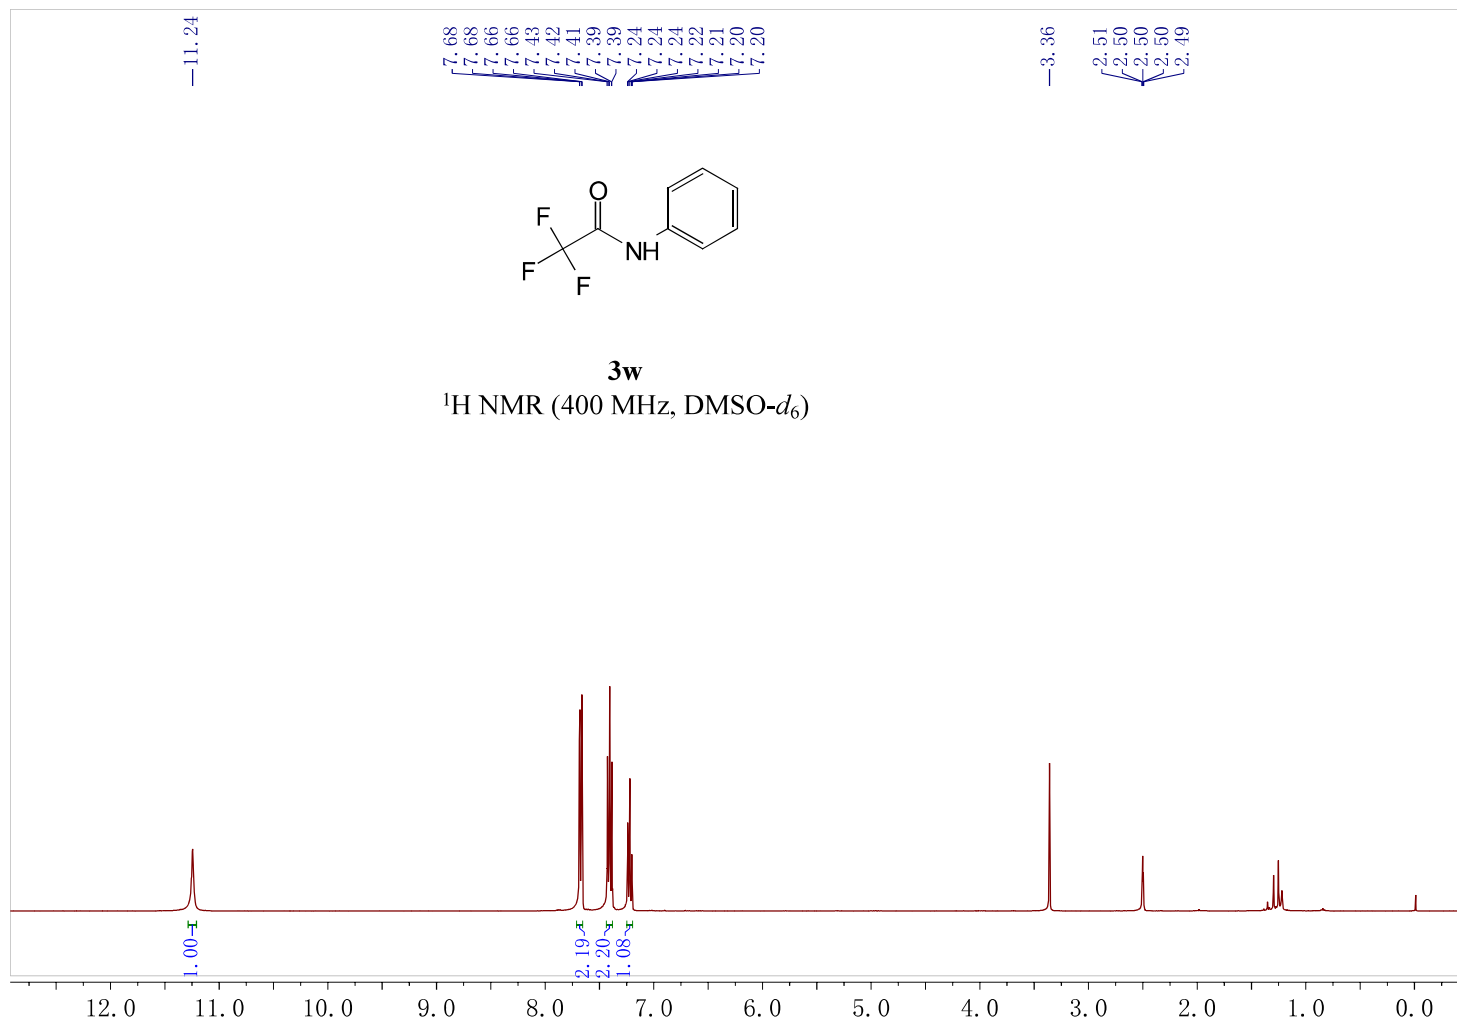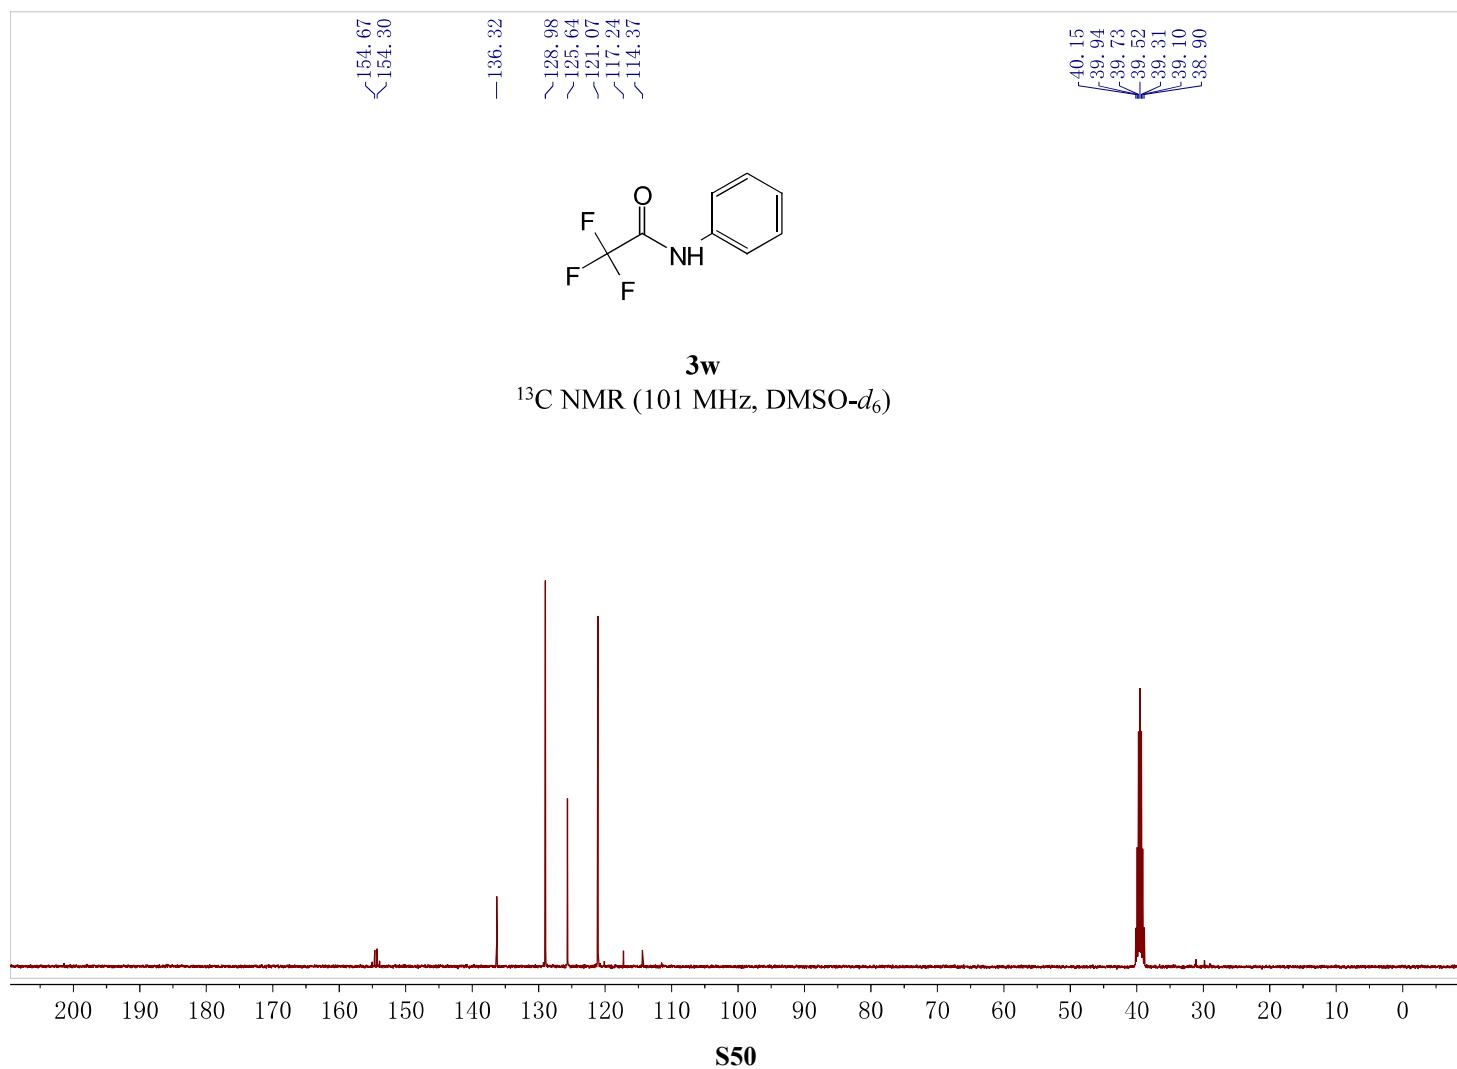

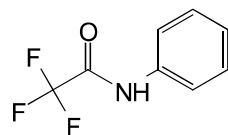

-73.95

**3w**

$^{19}\text{F}$  NMR (376 MHz,  $\text{DMSO-}d_6$ )

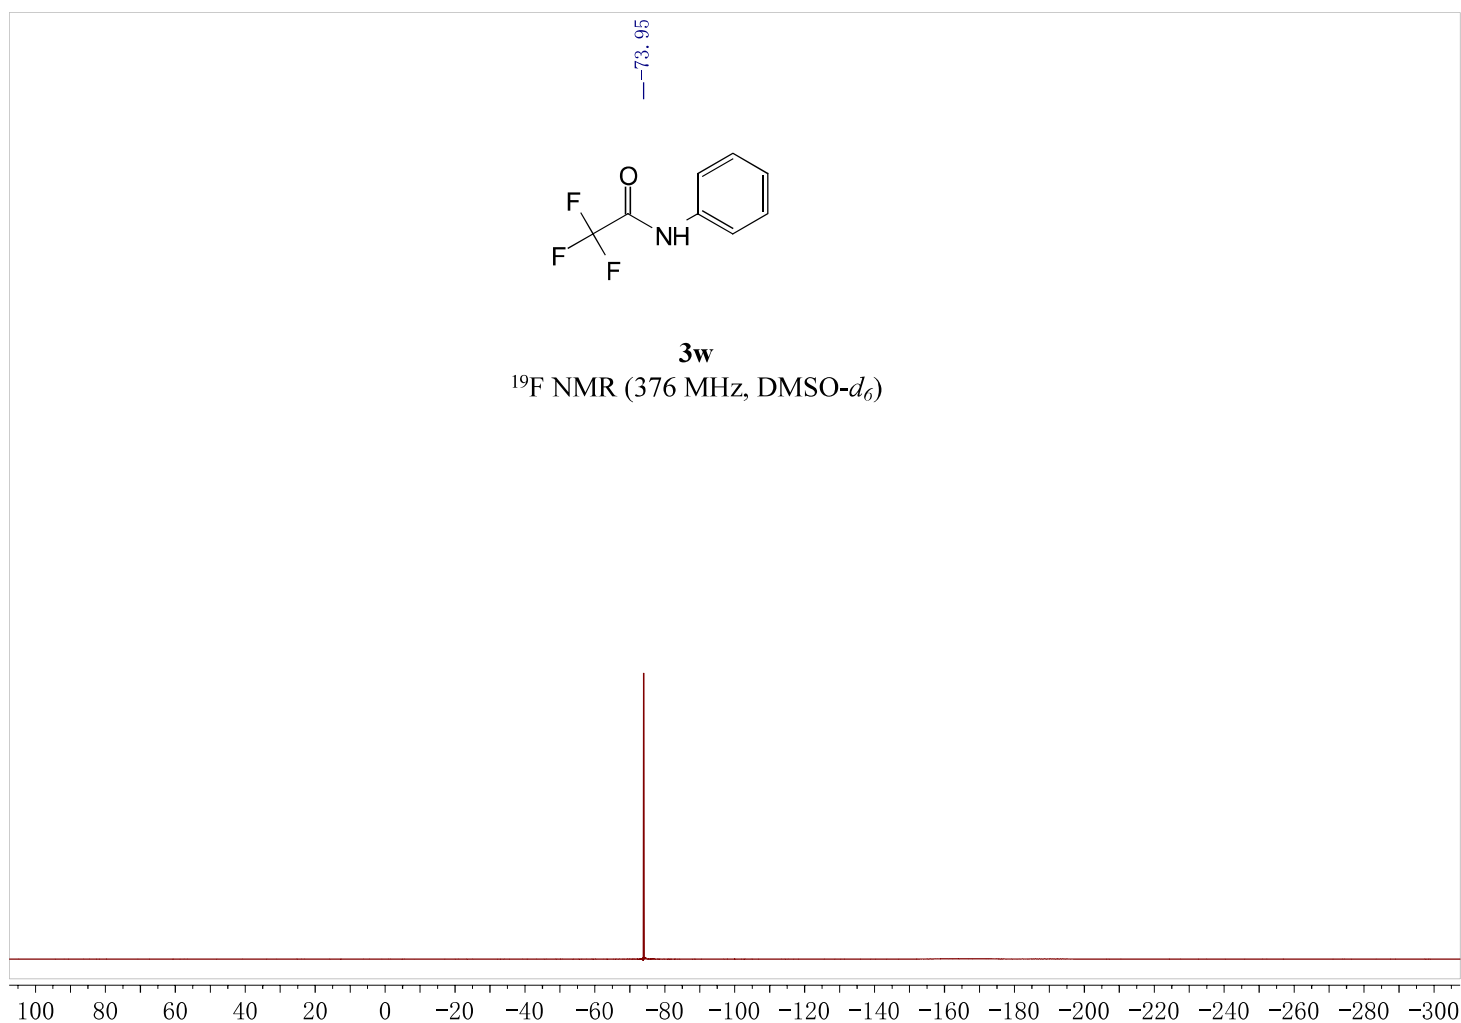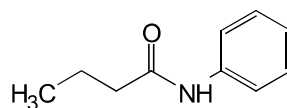

**3x**

$^1\text{H}$  NMR (400 MHz,  $\text{DMSO-}d_6$ )

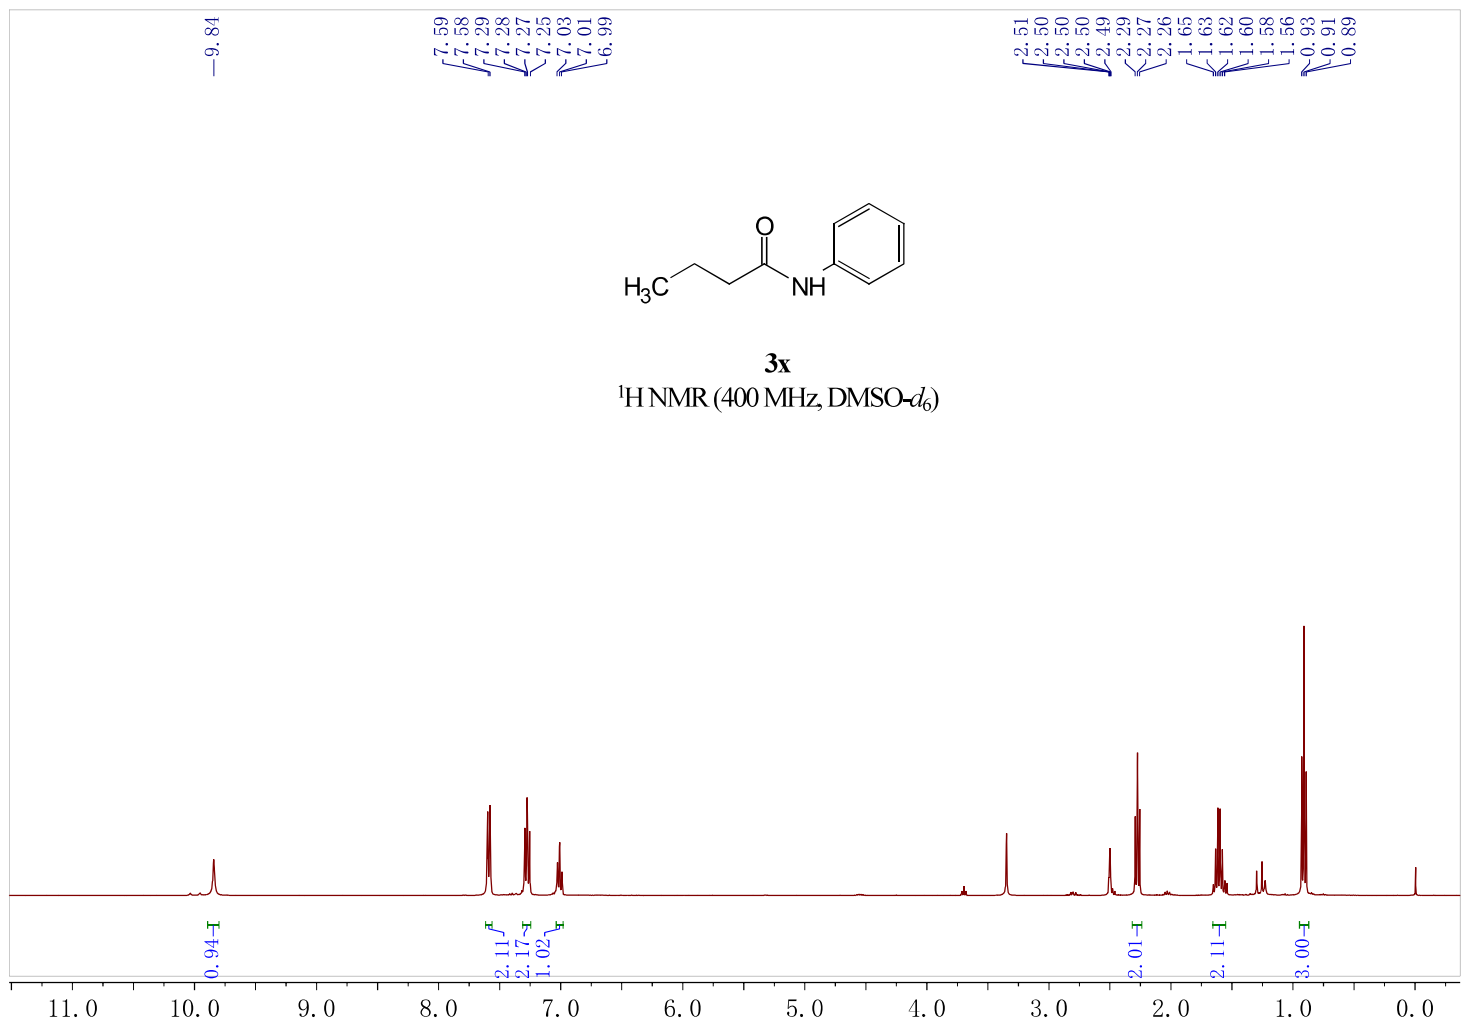

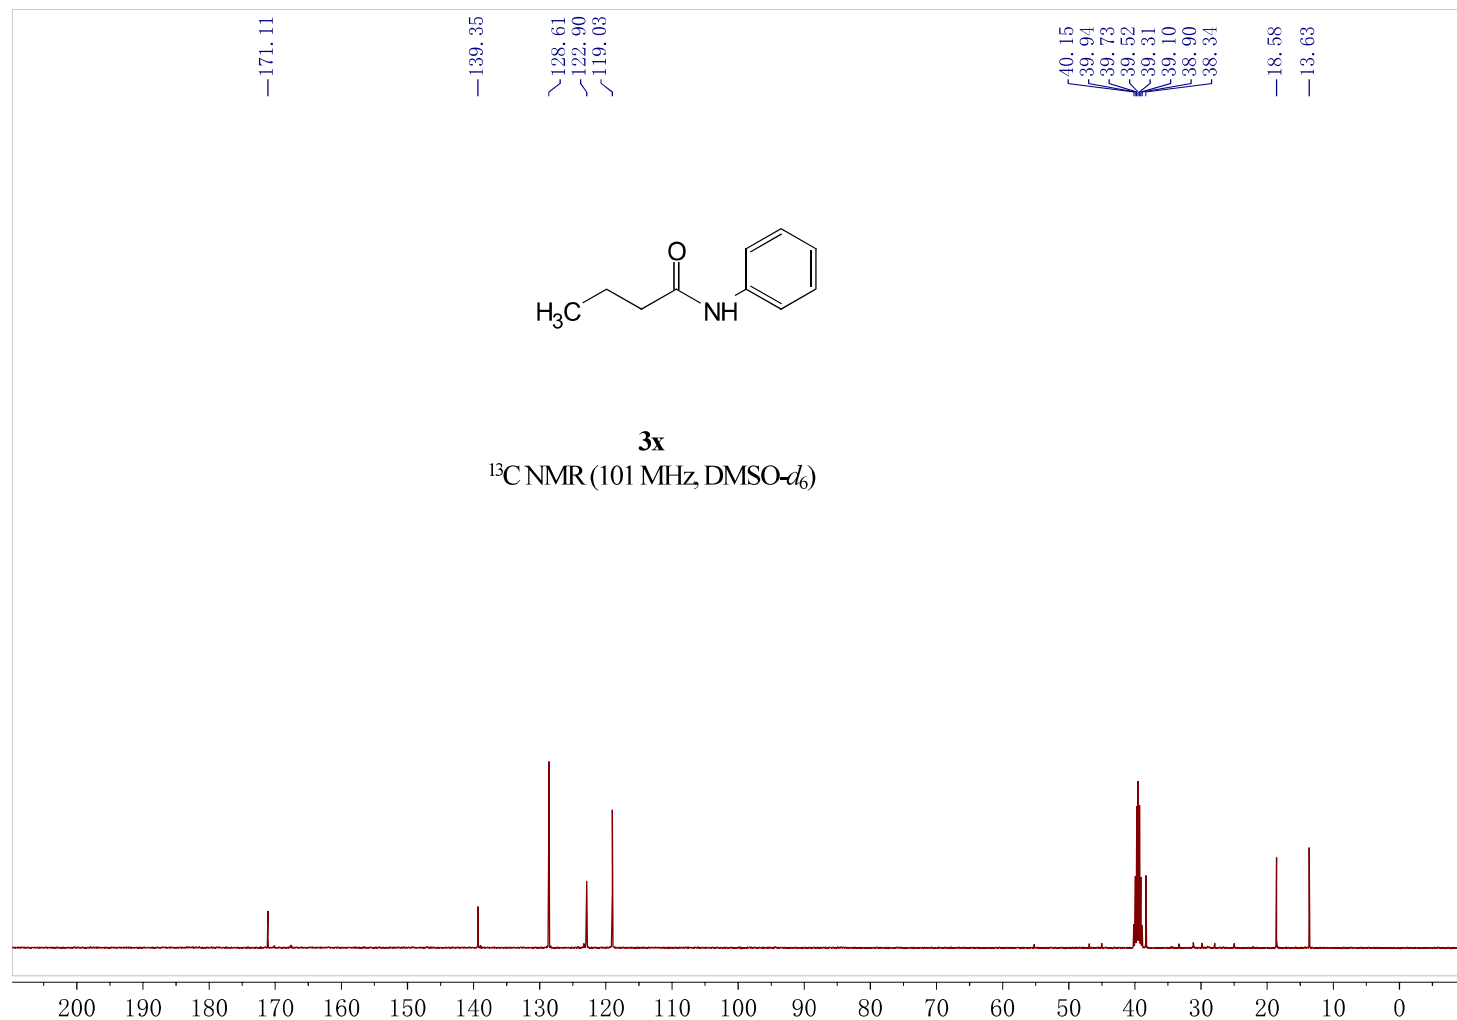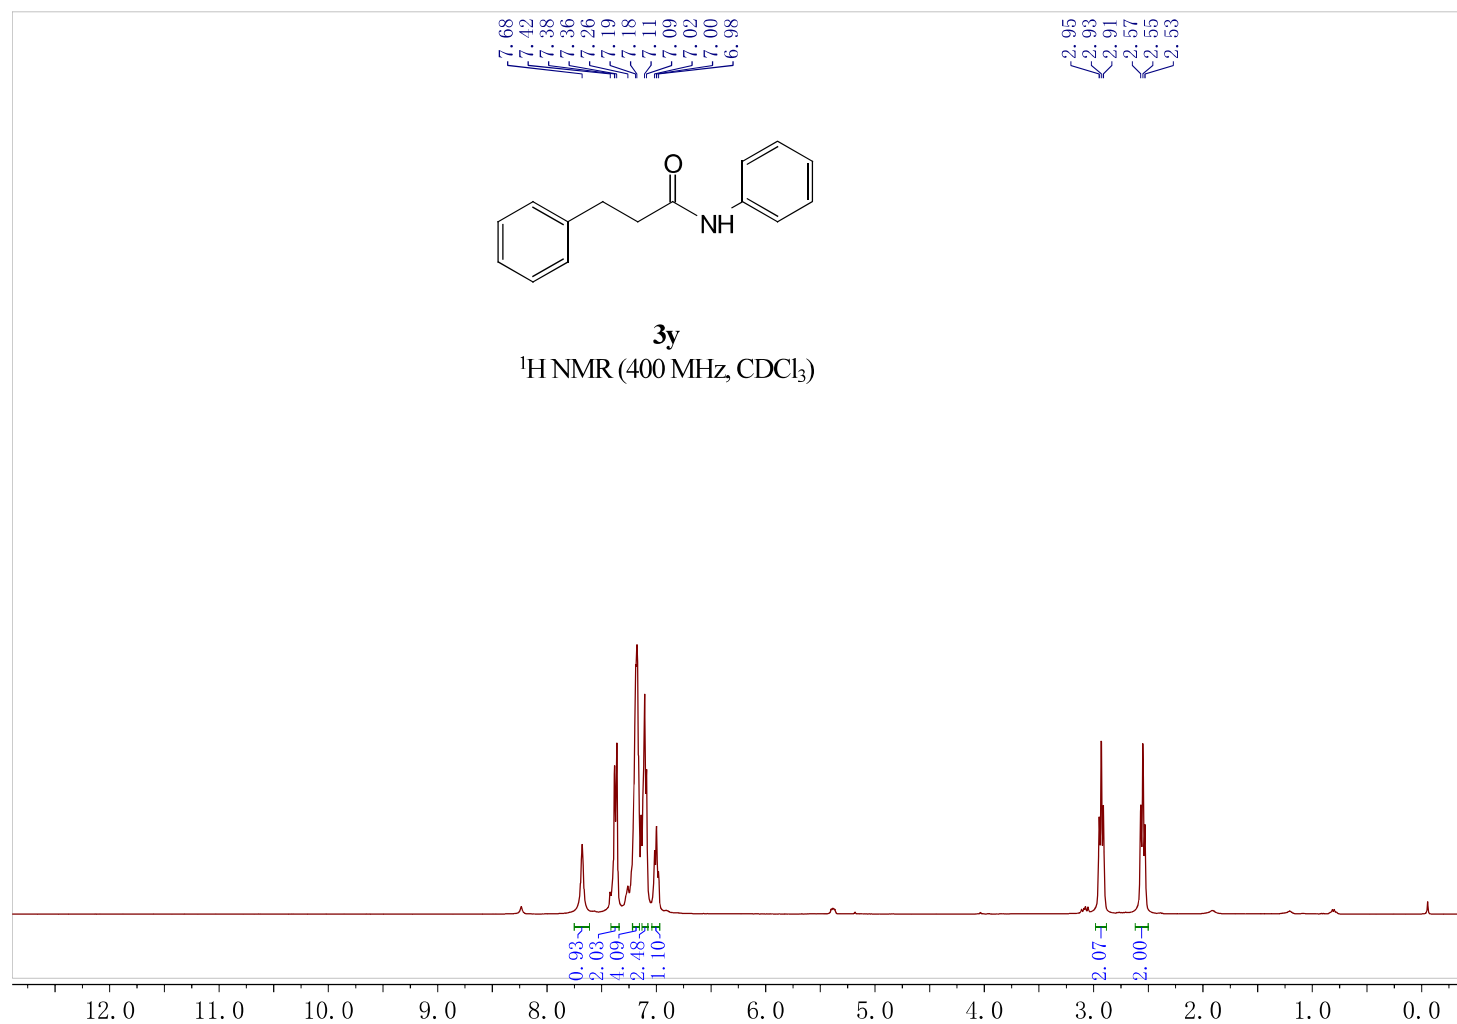

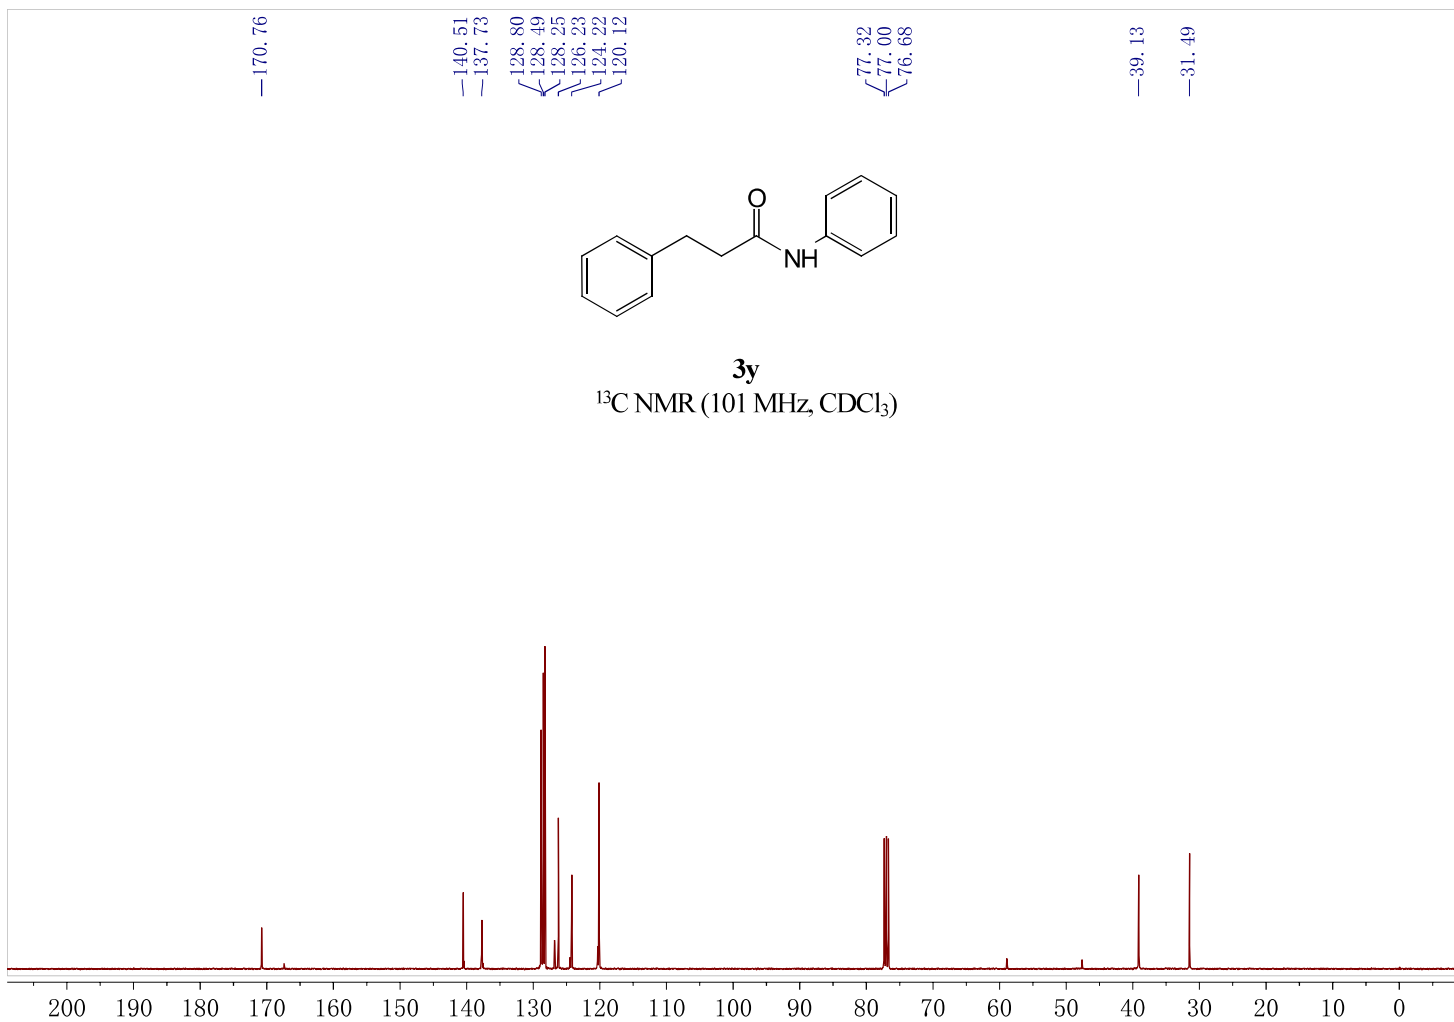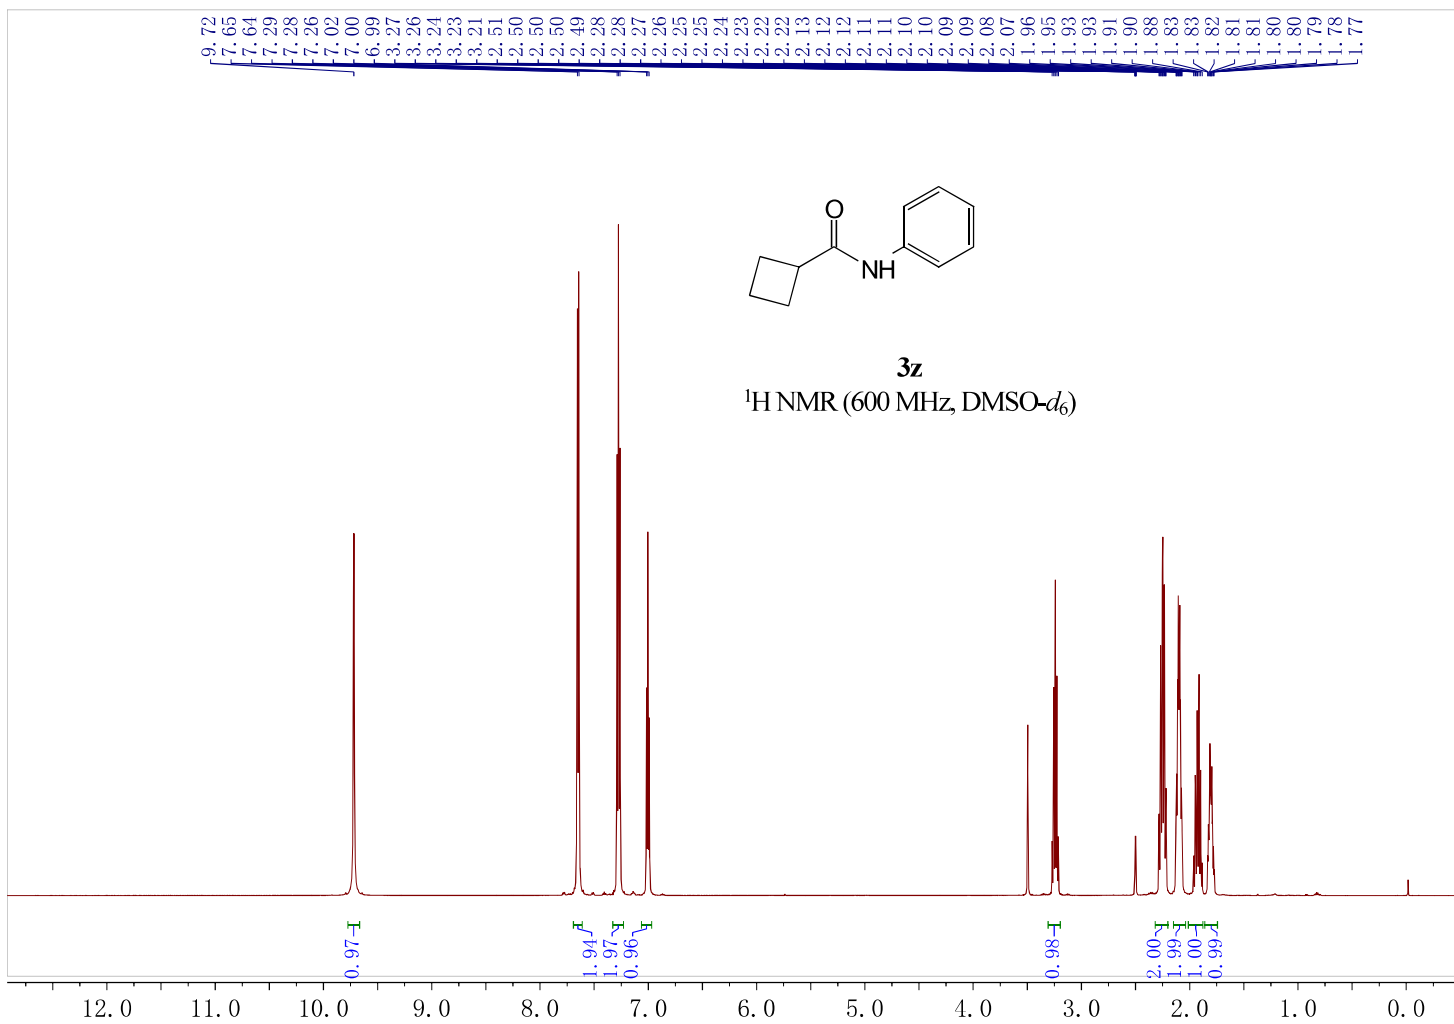

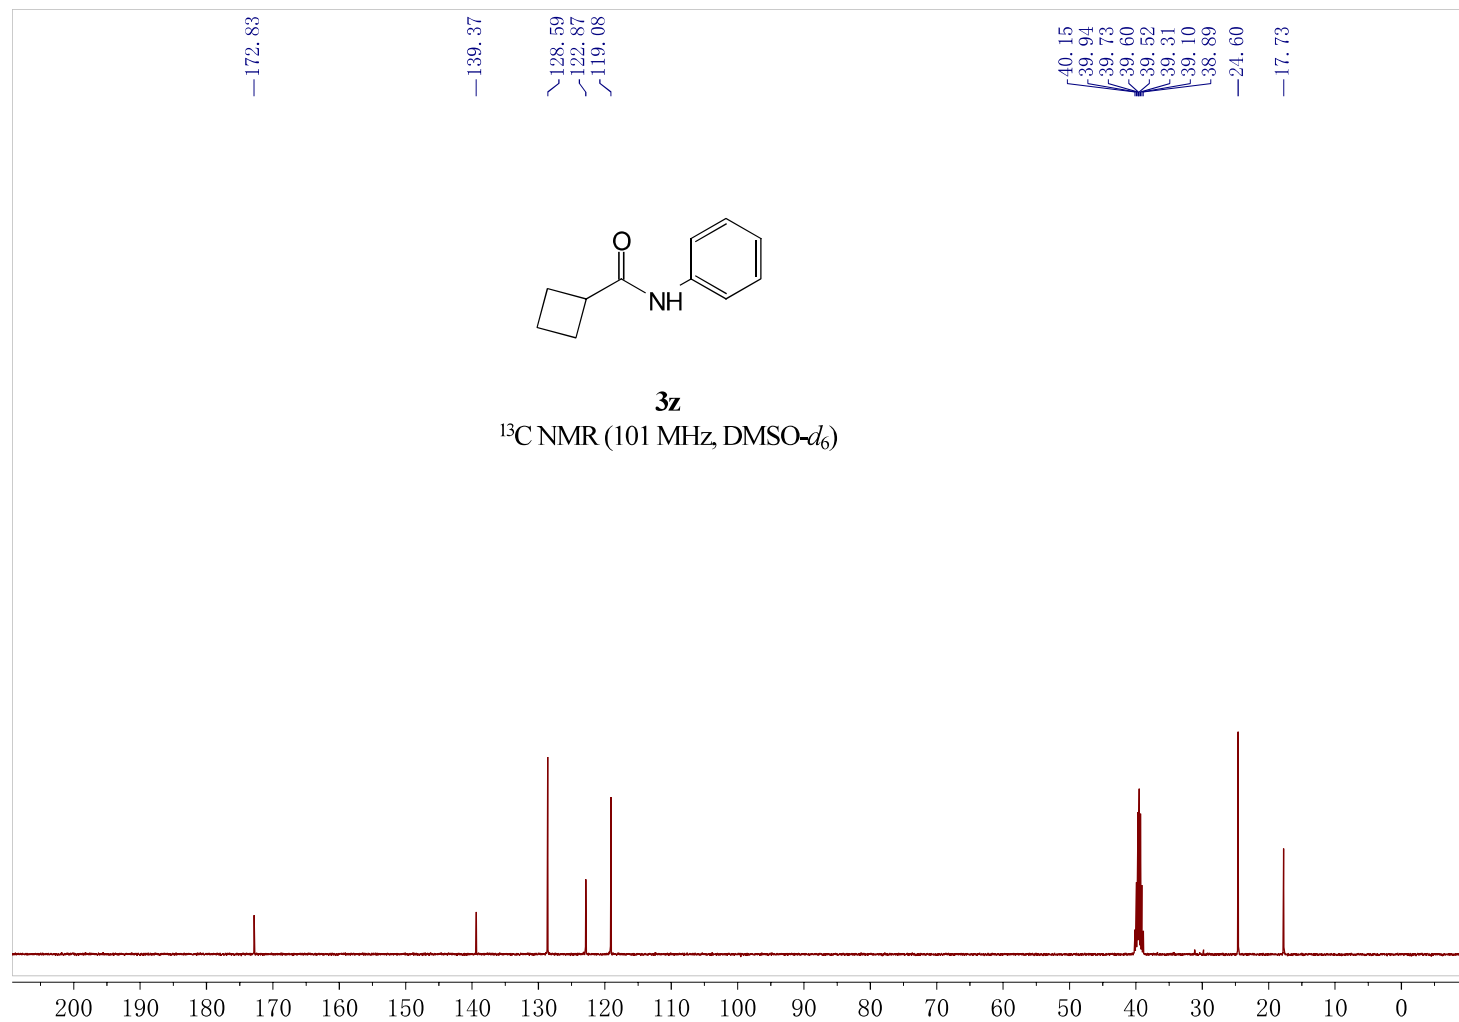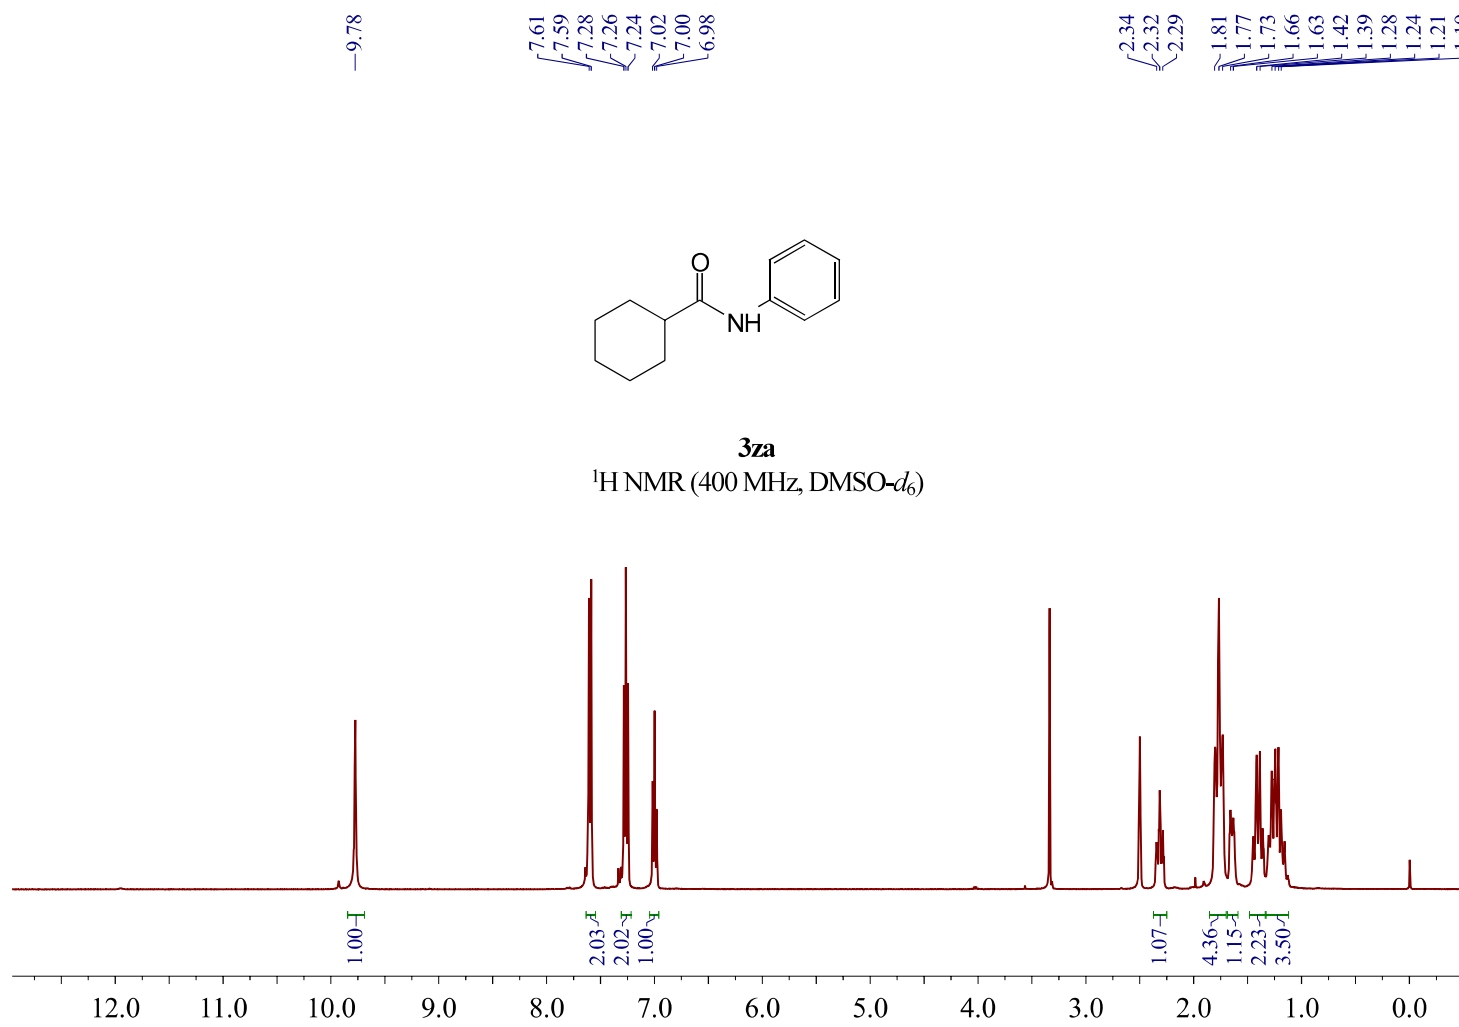

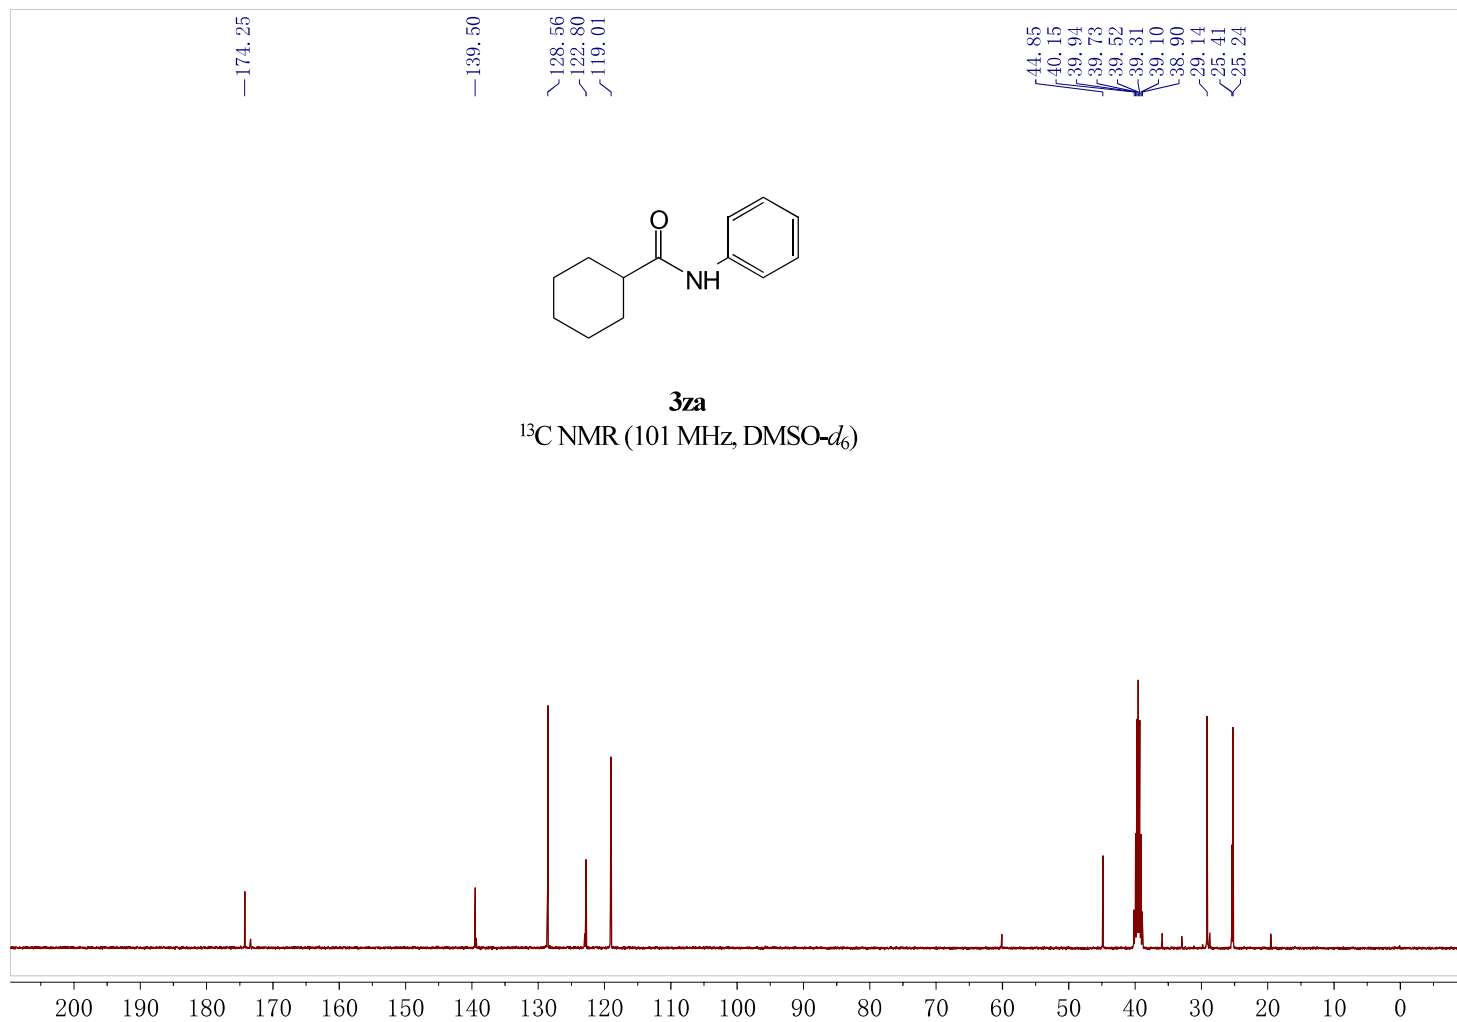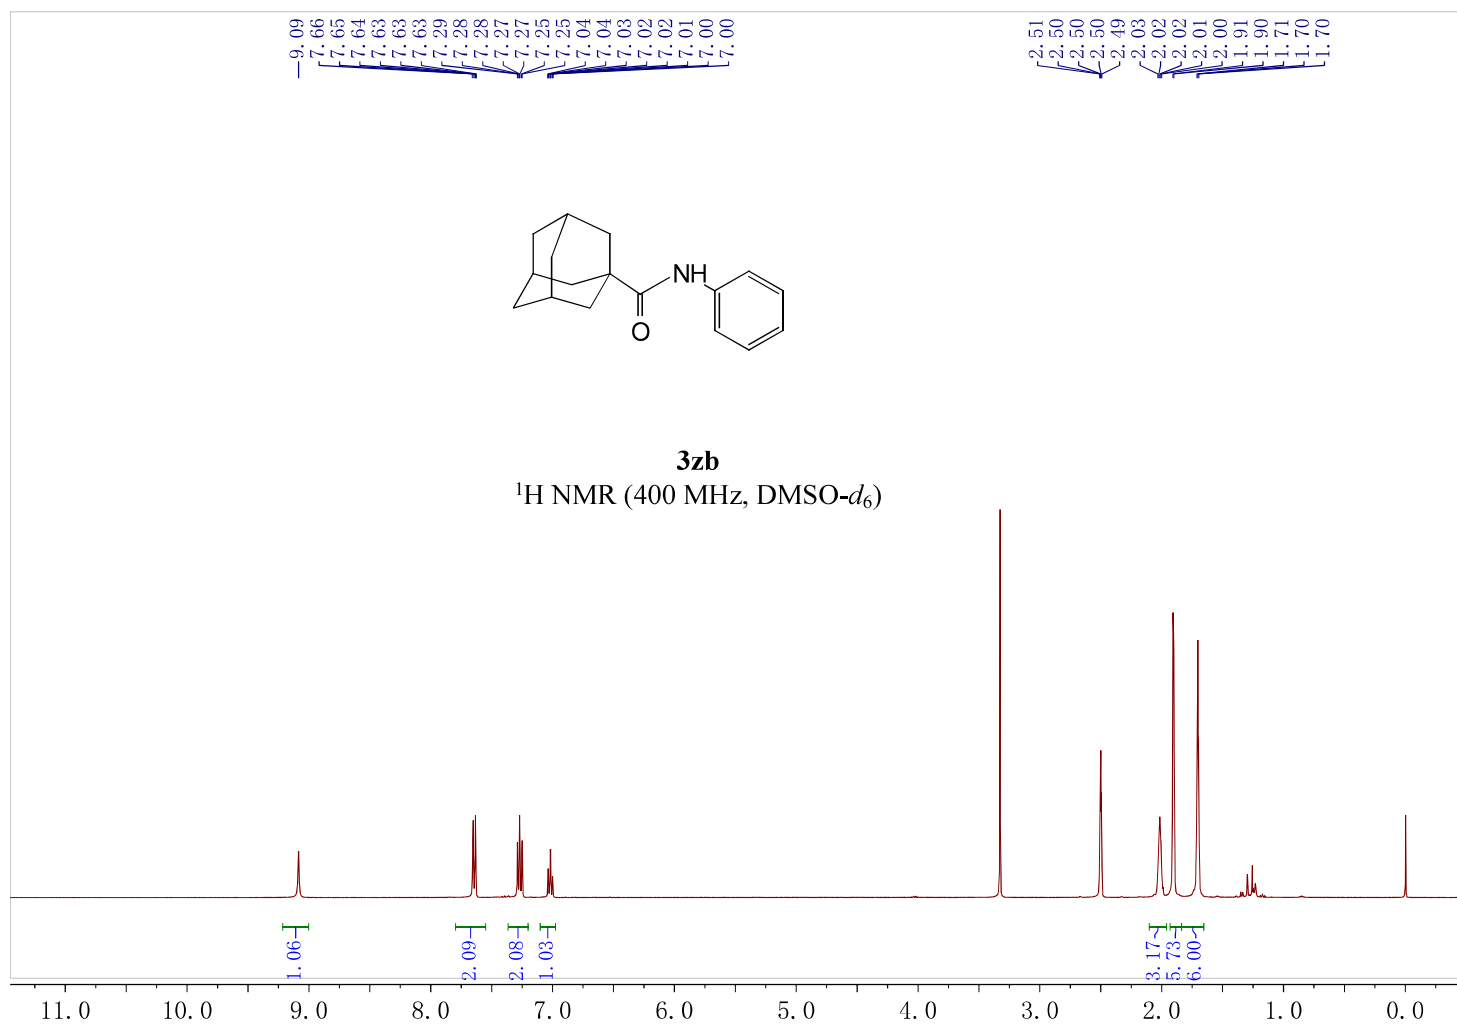

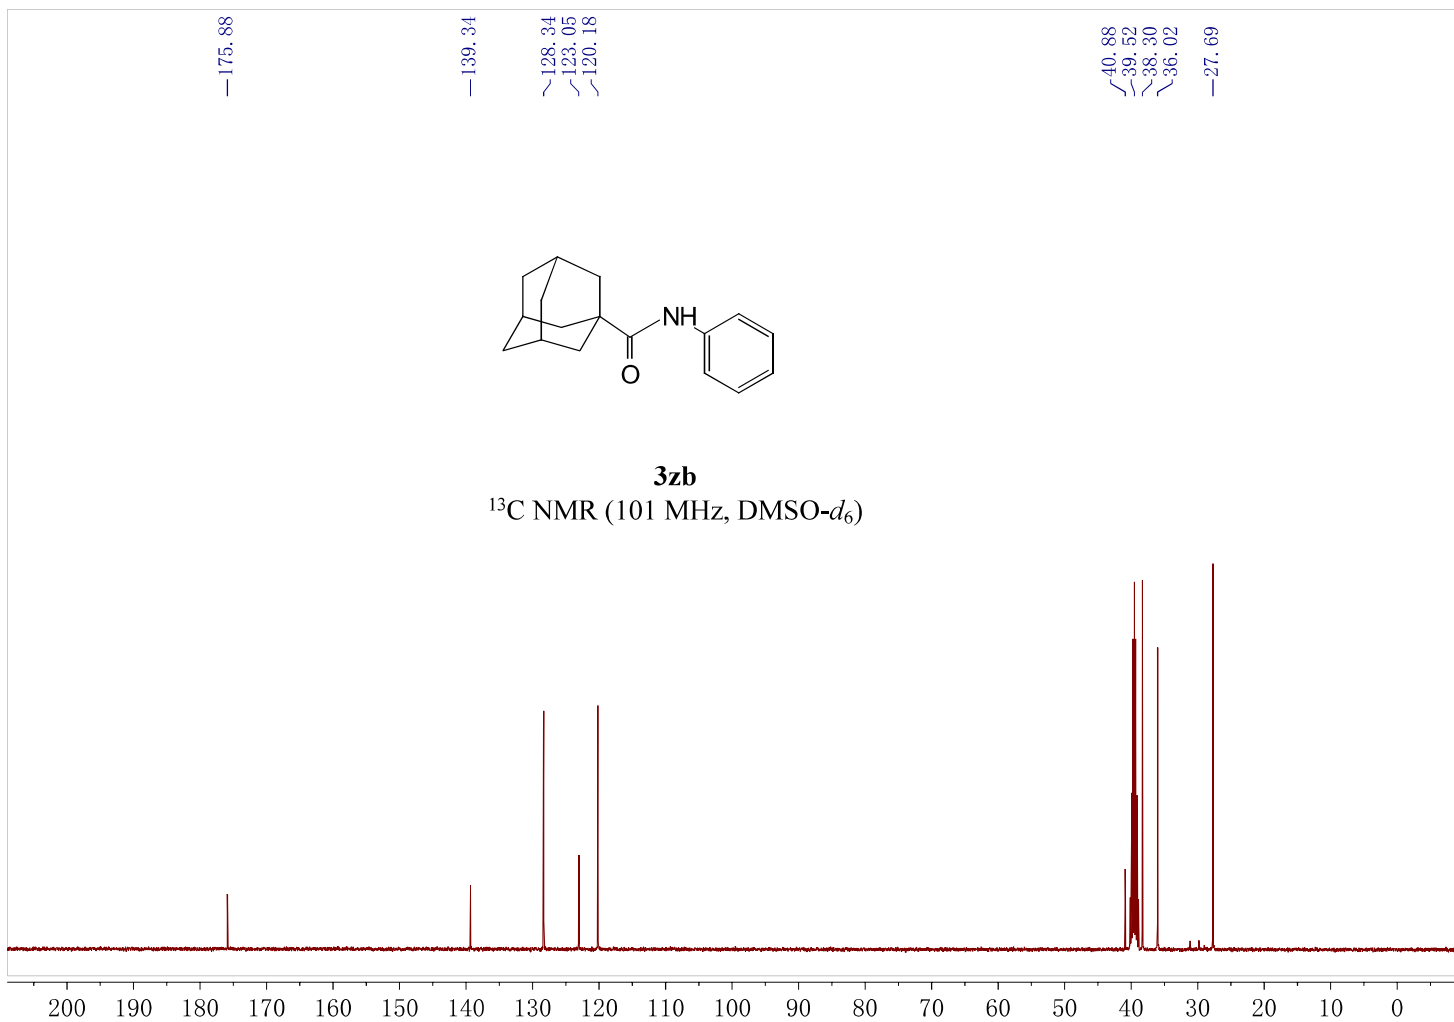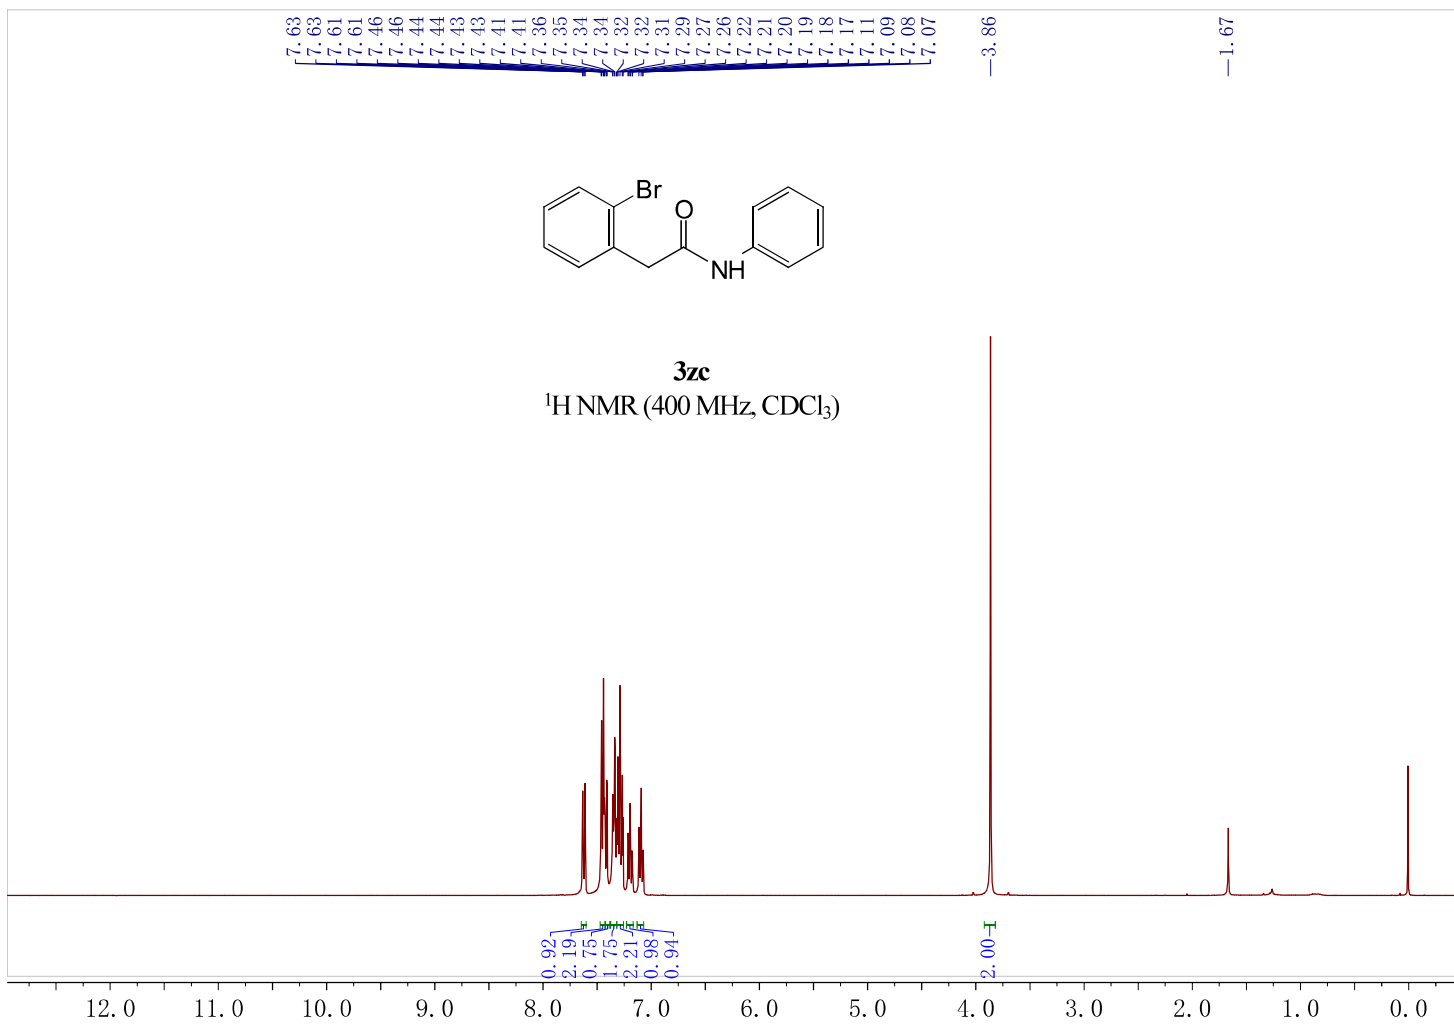



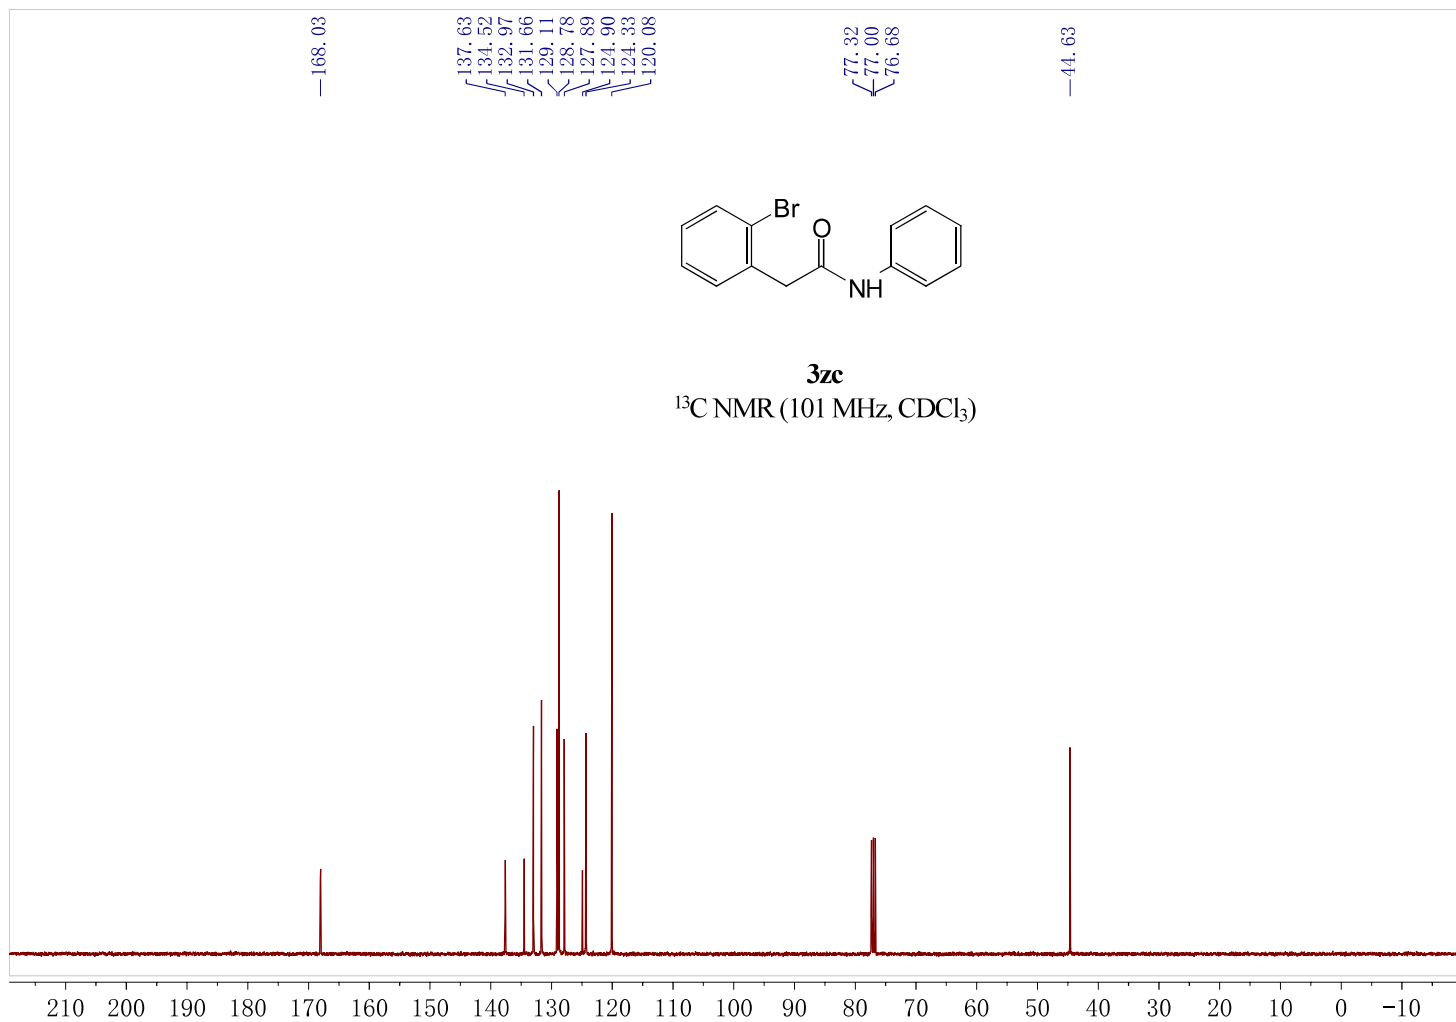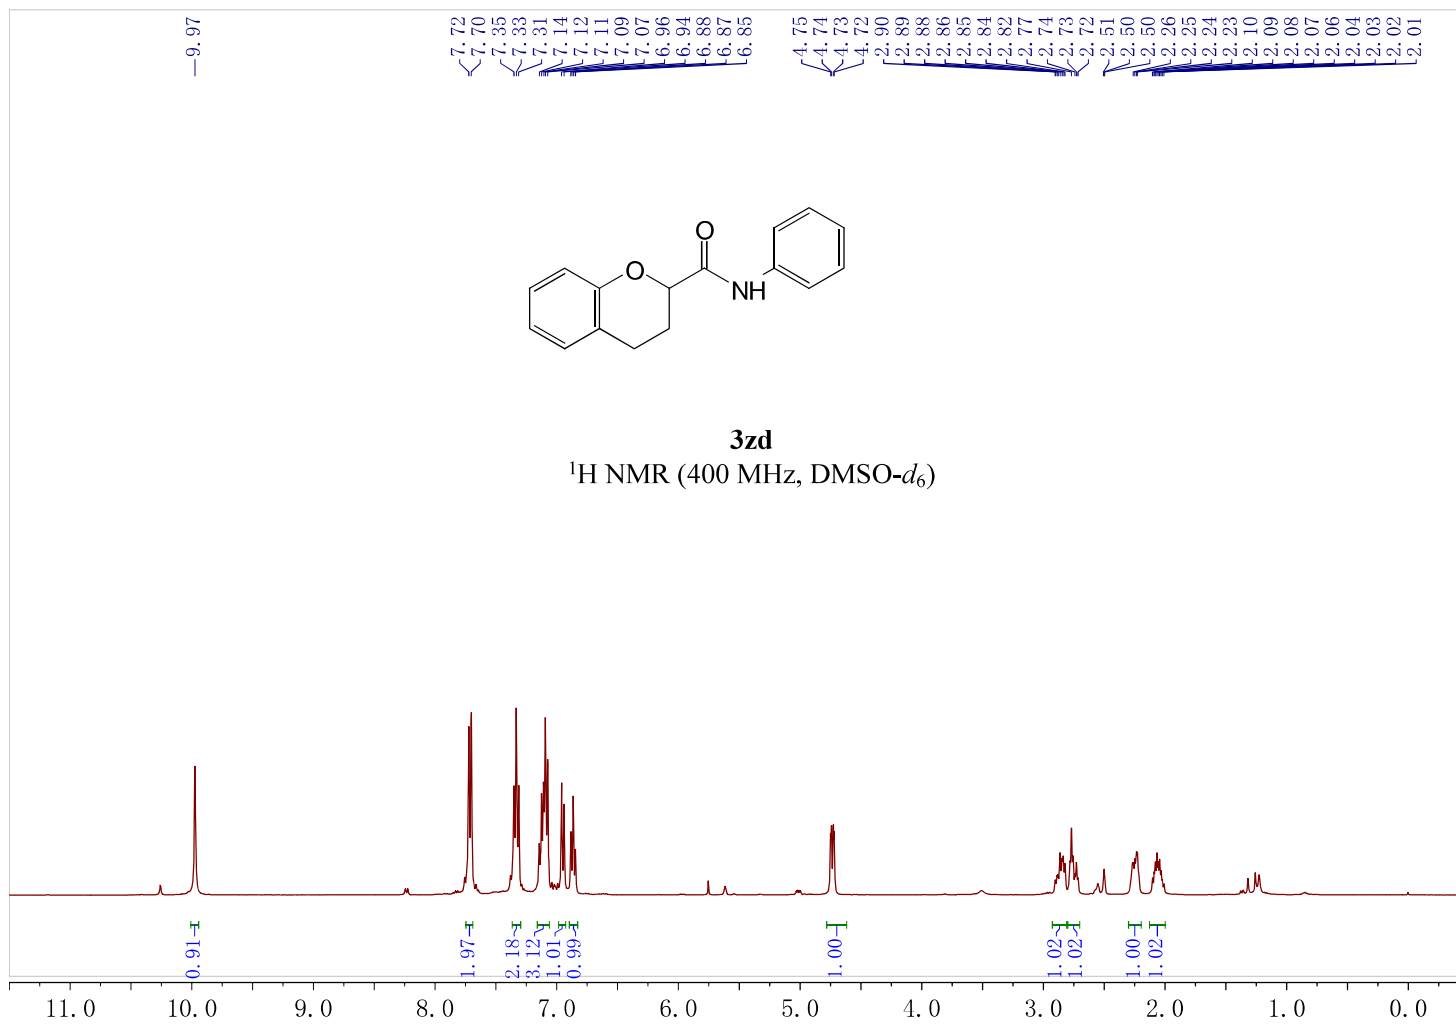

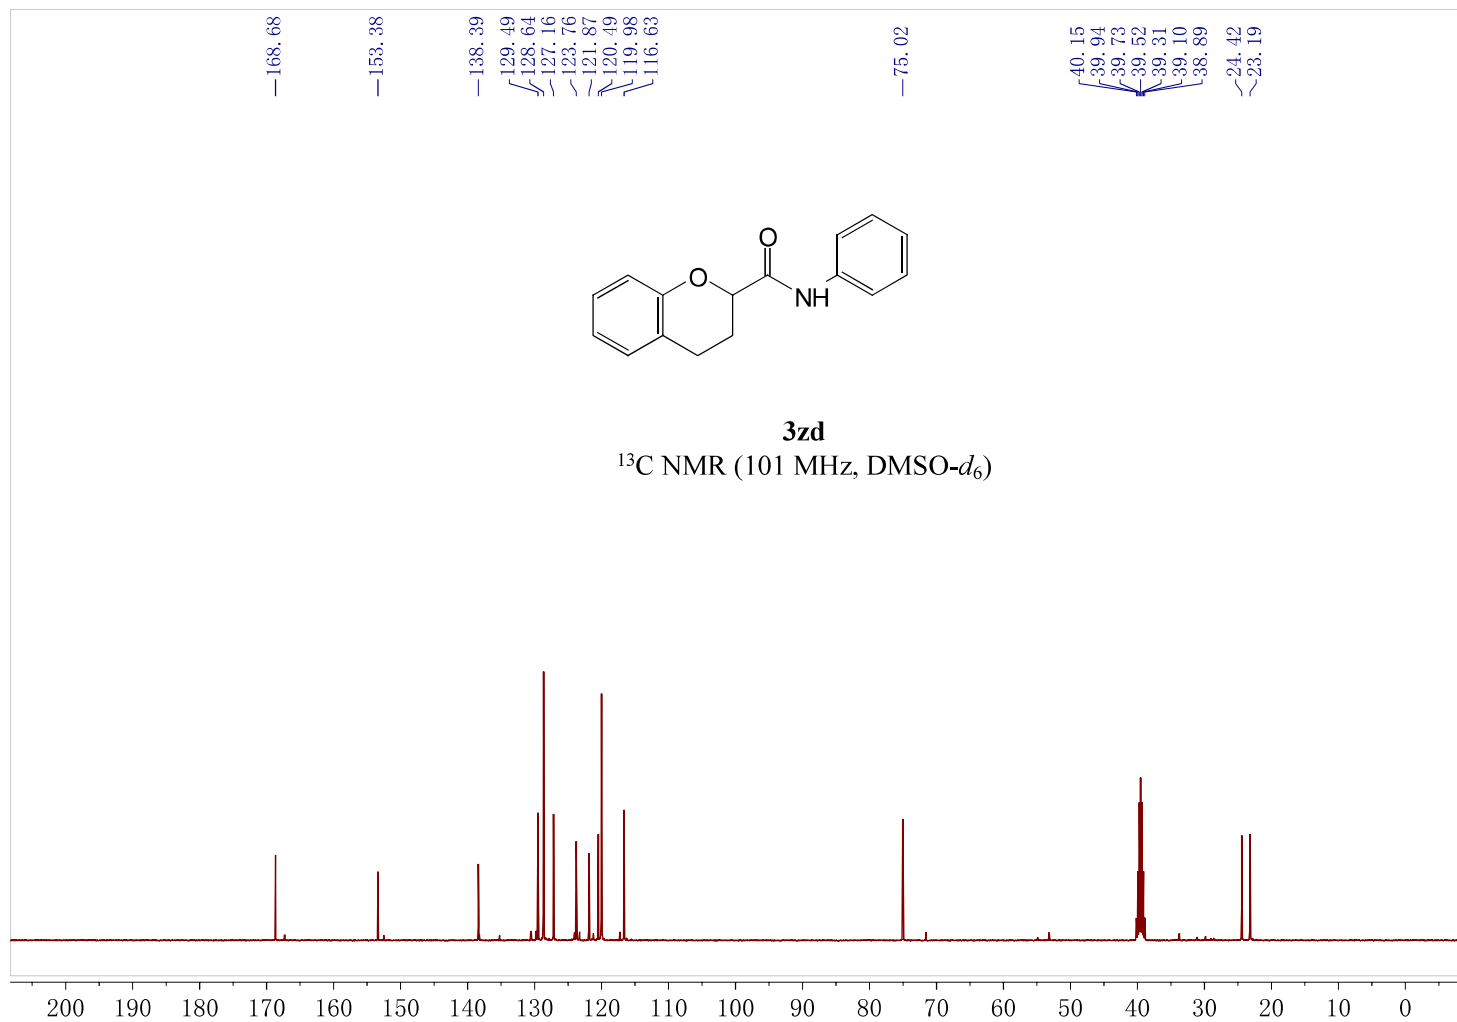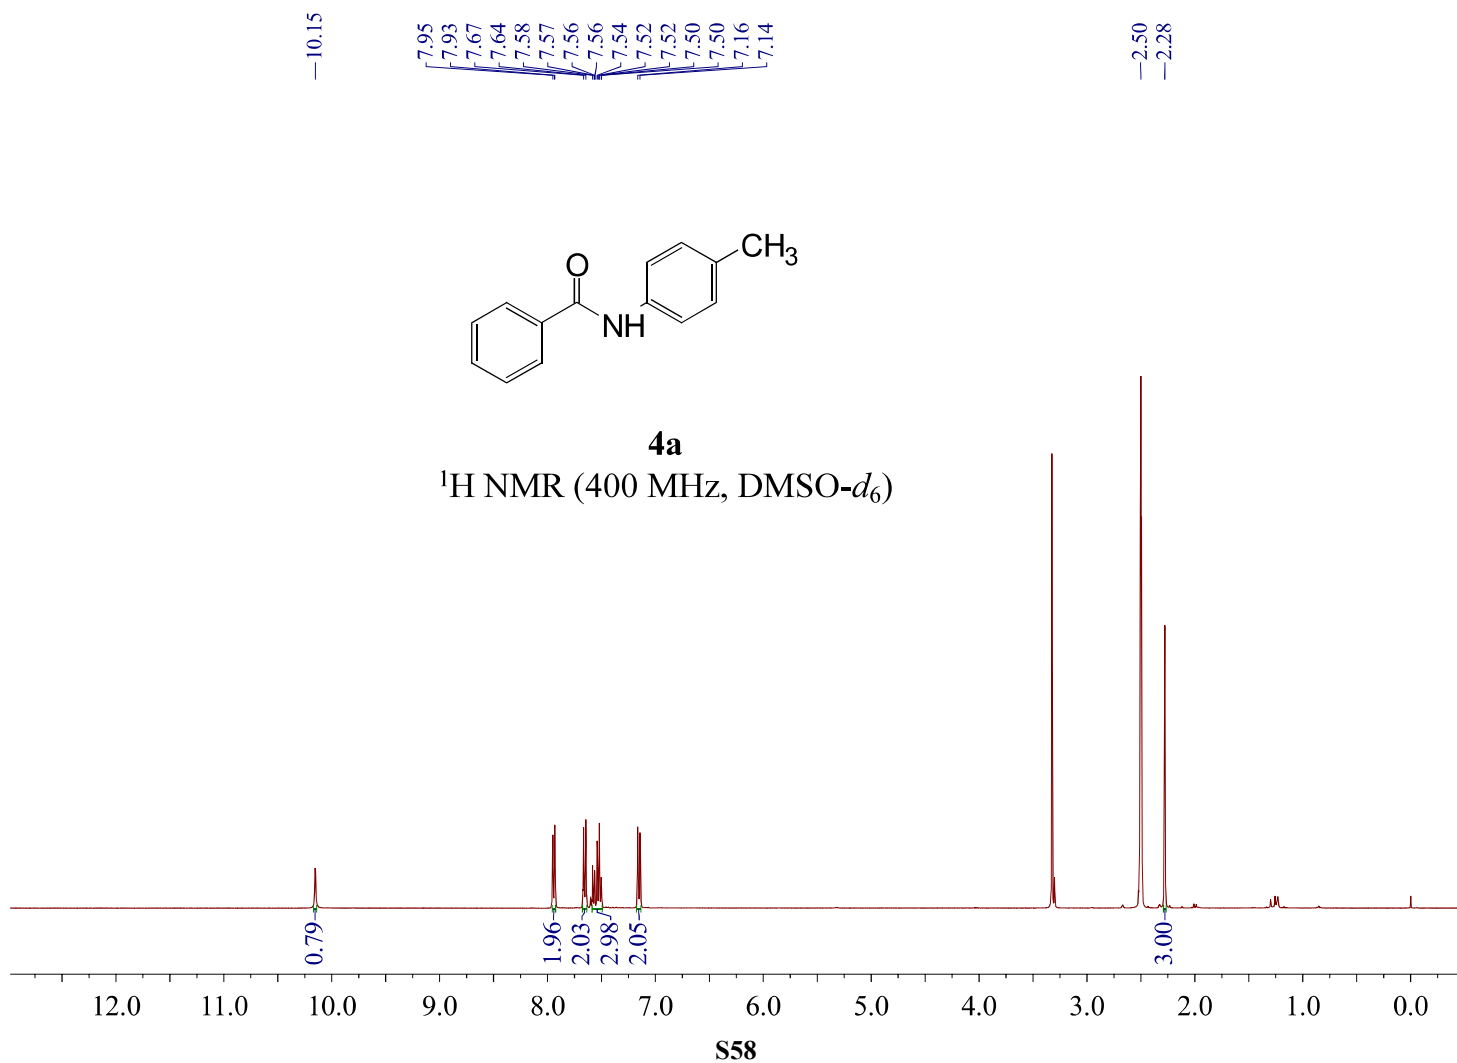

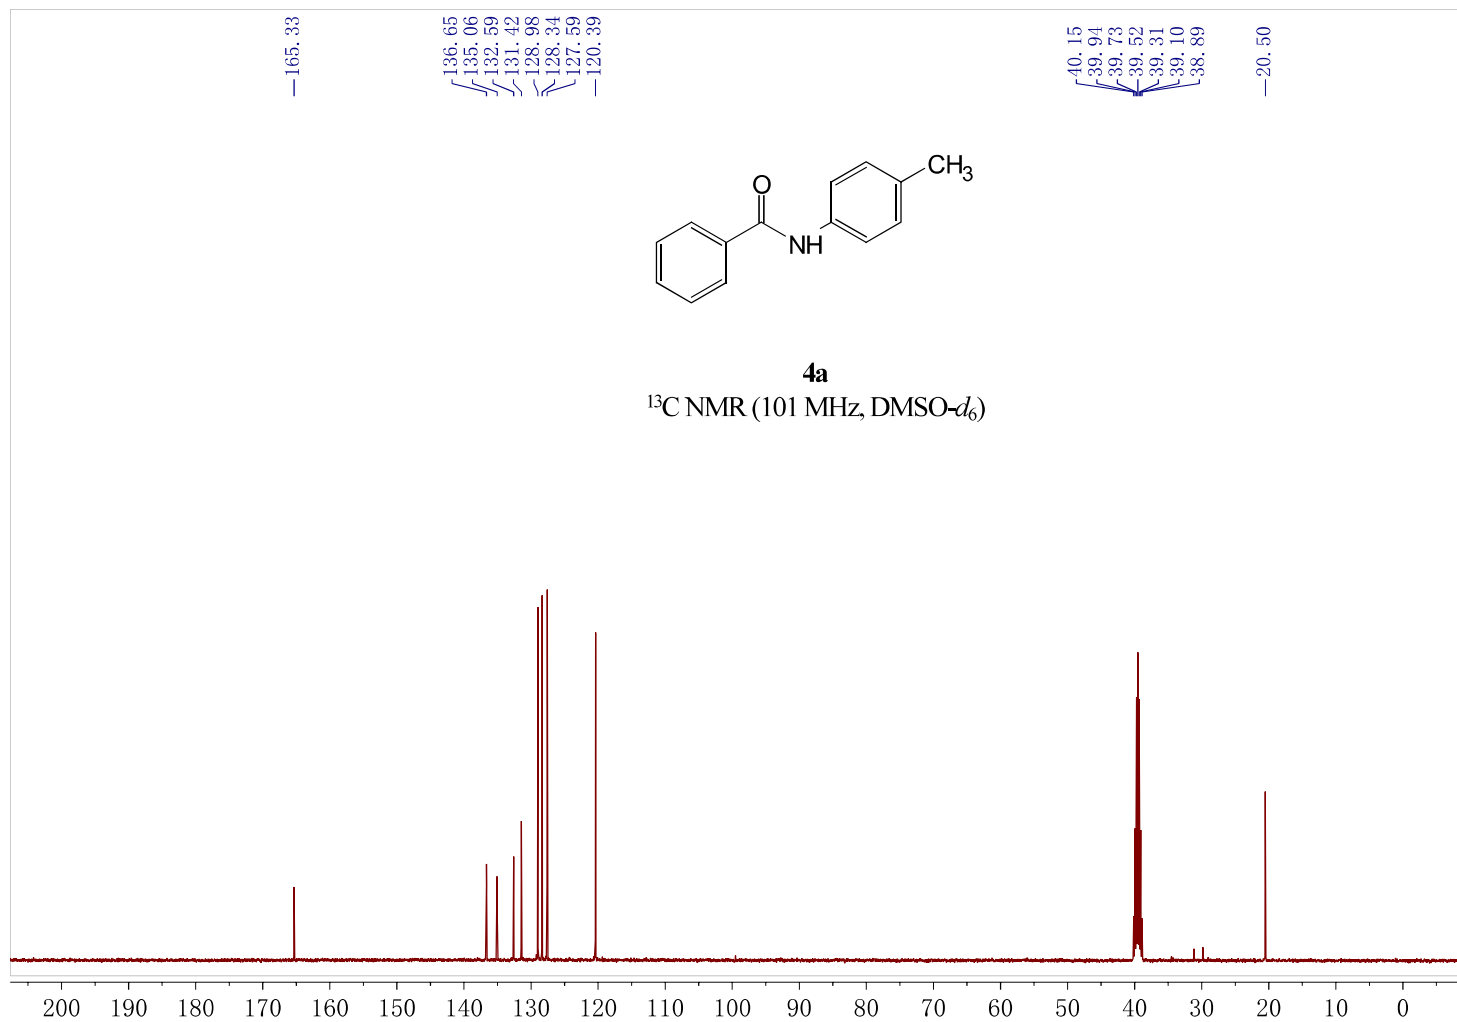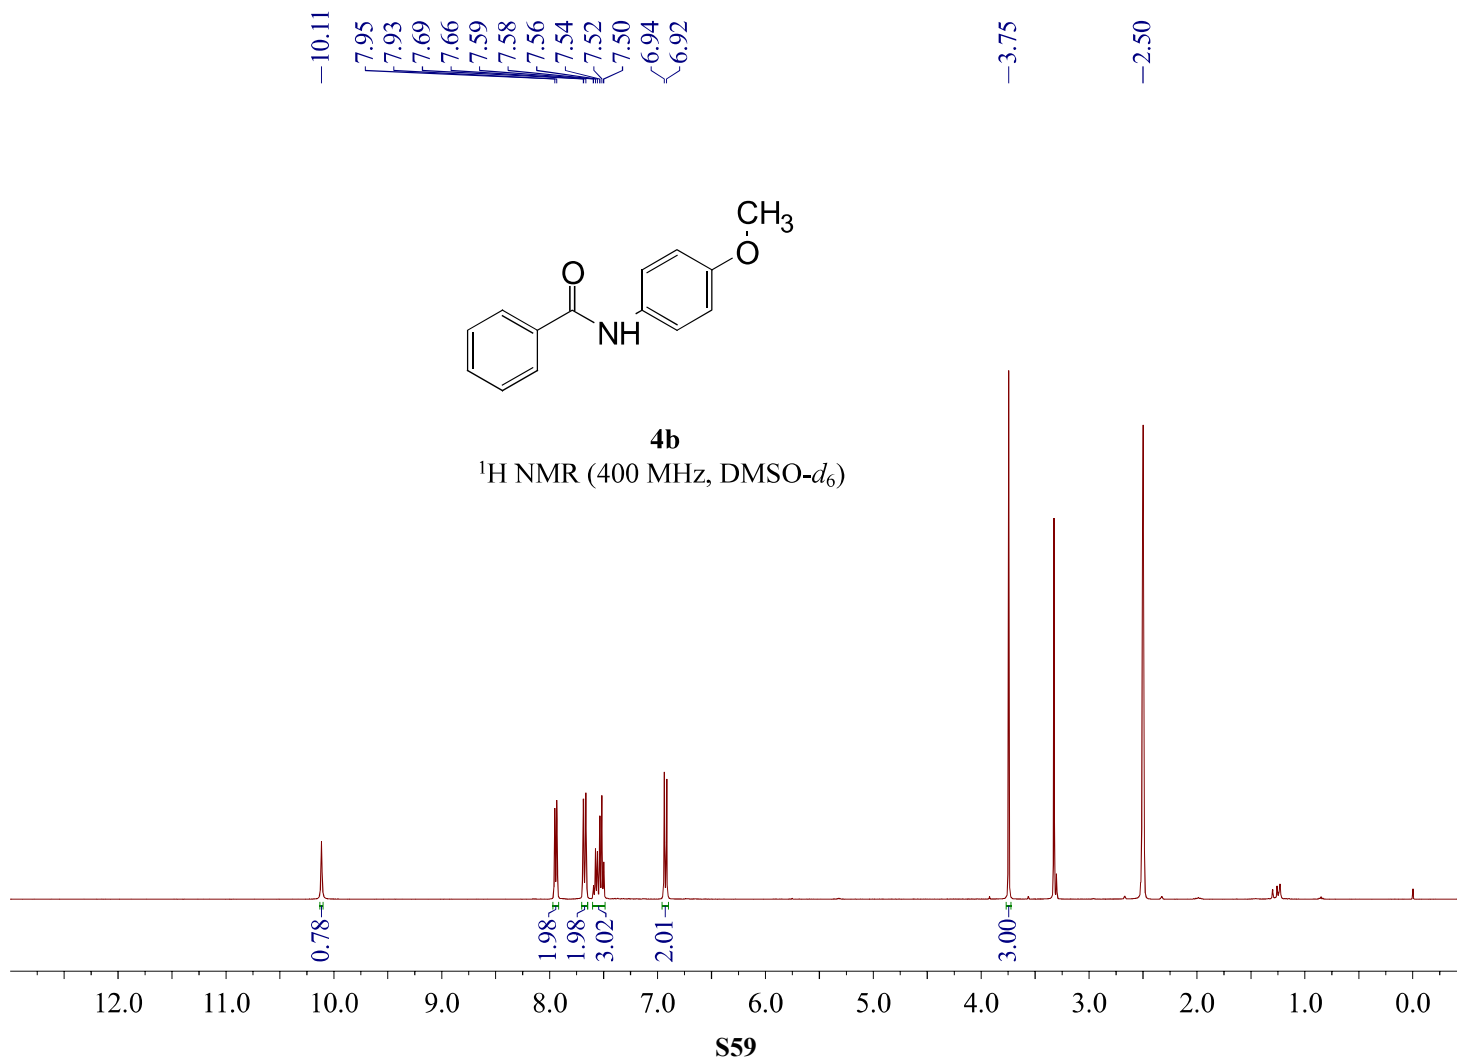

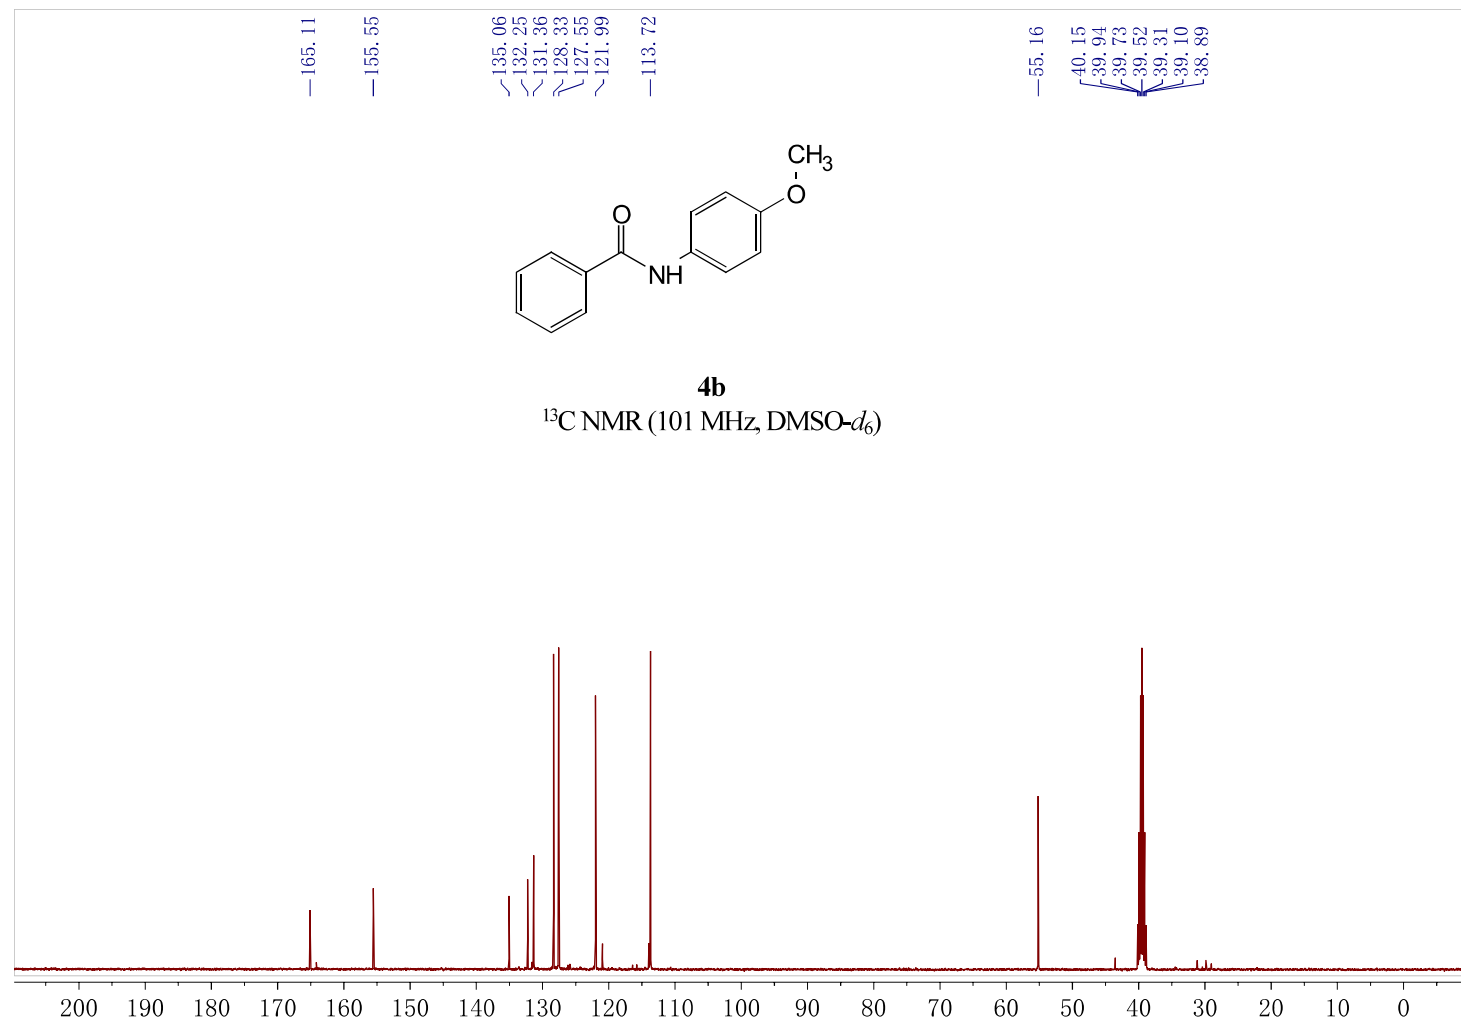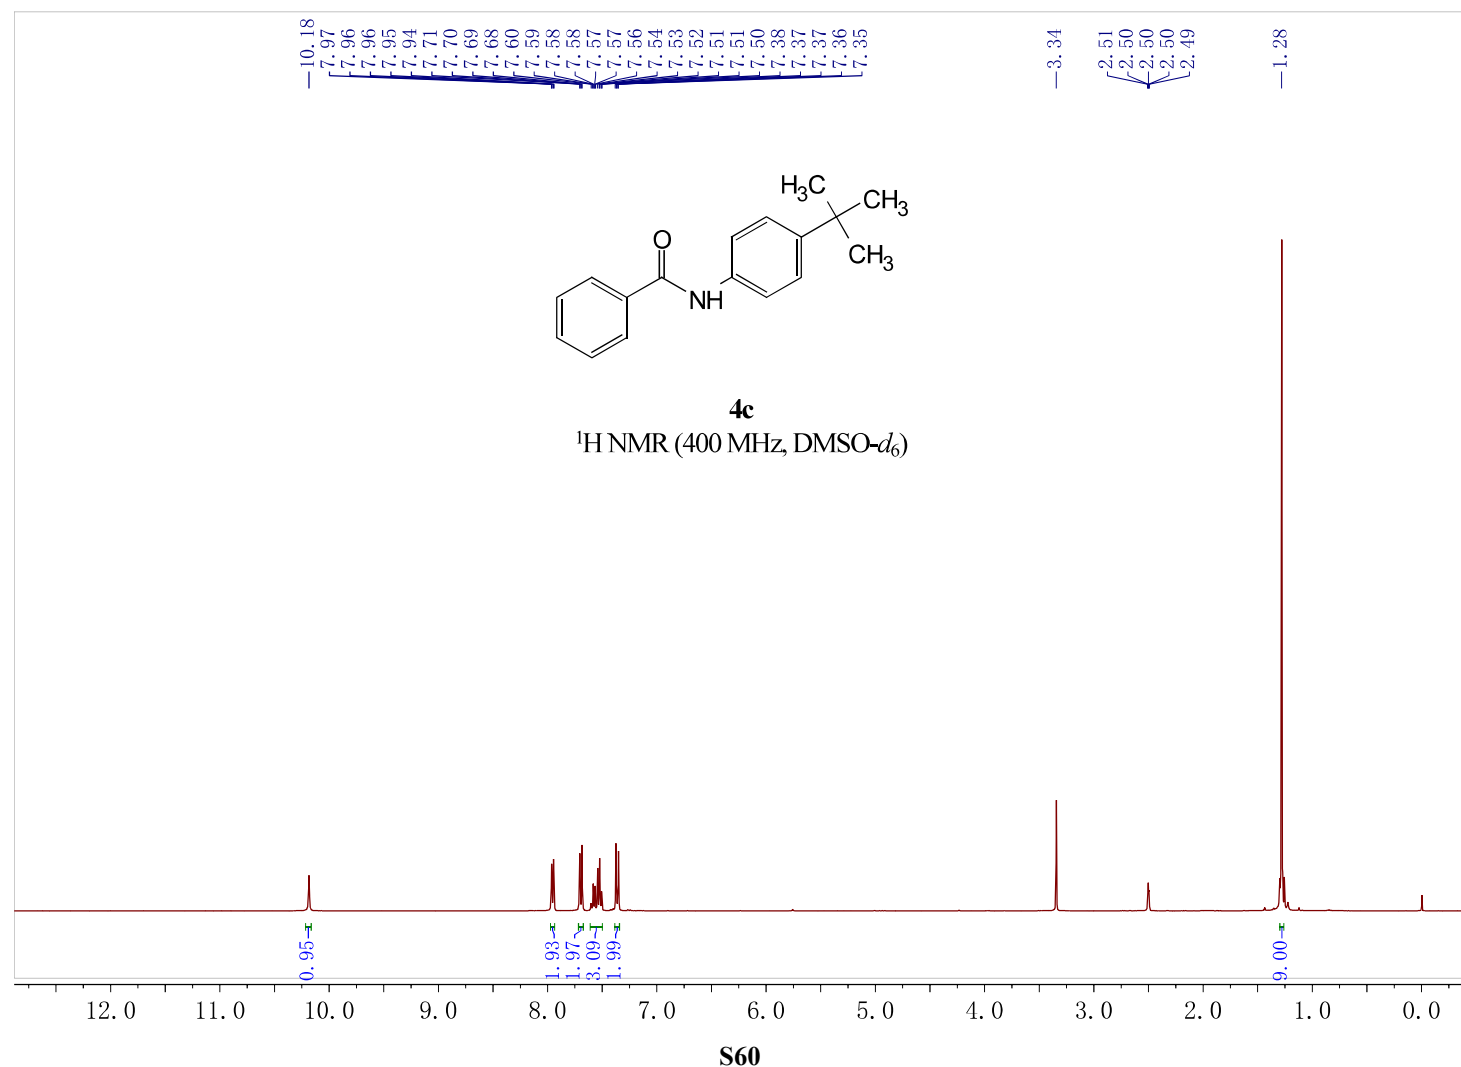

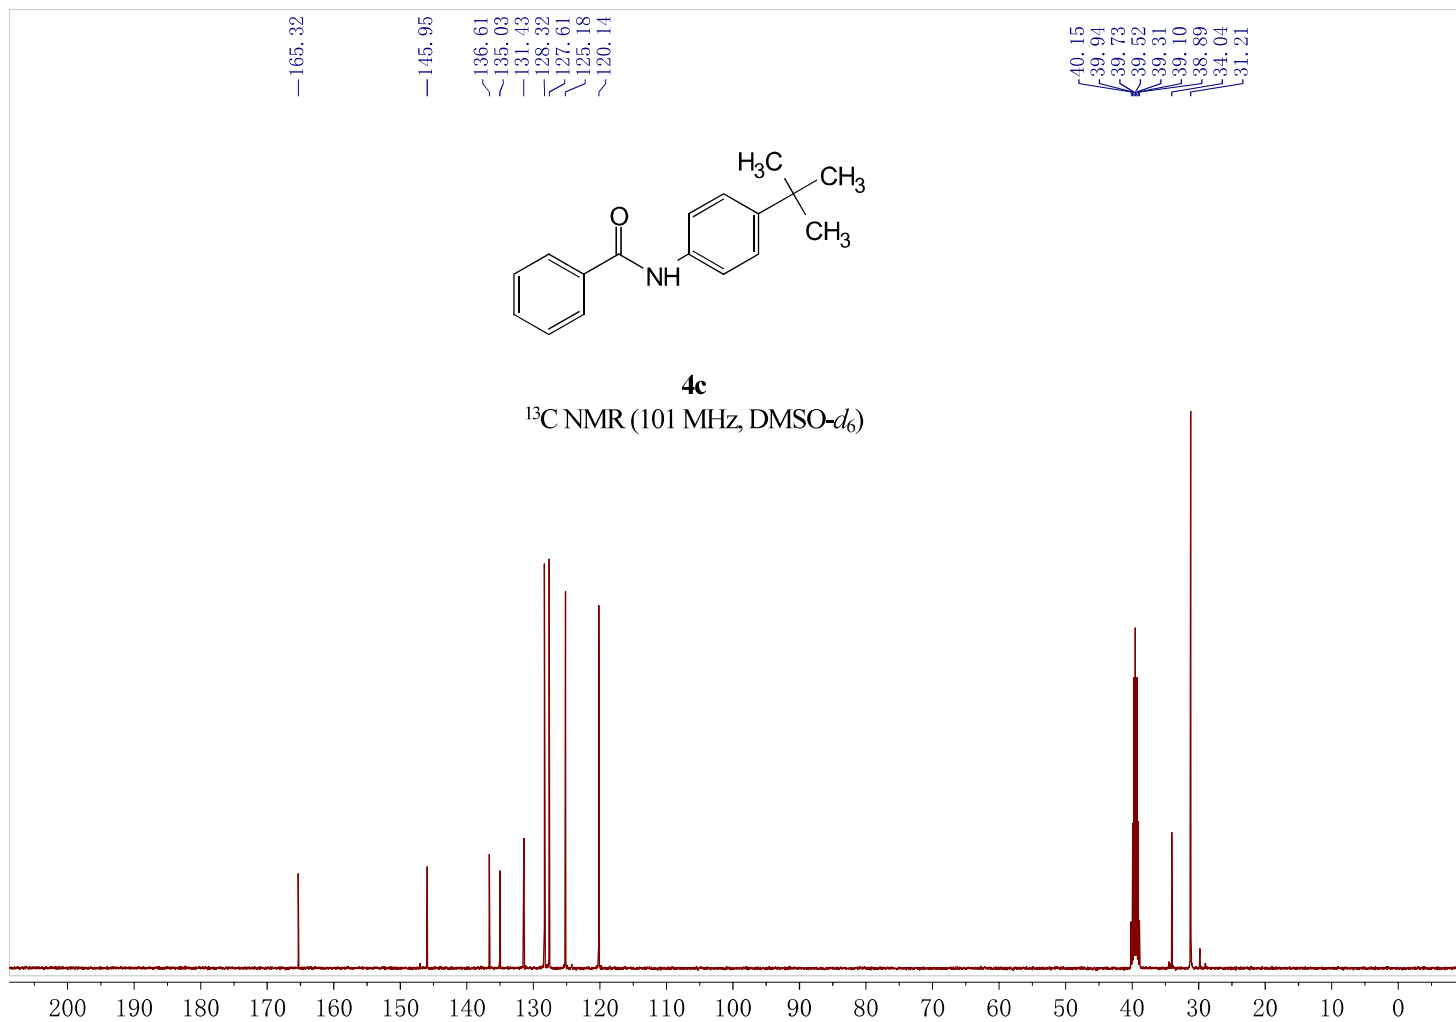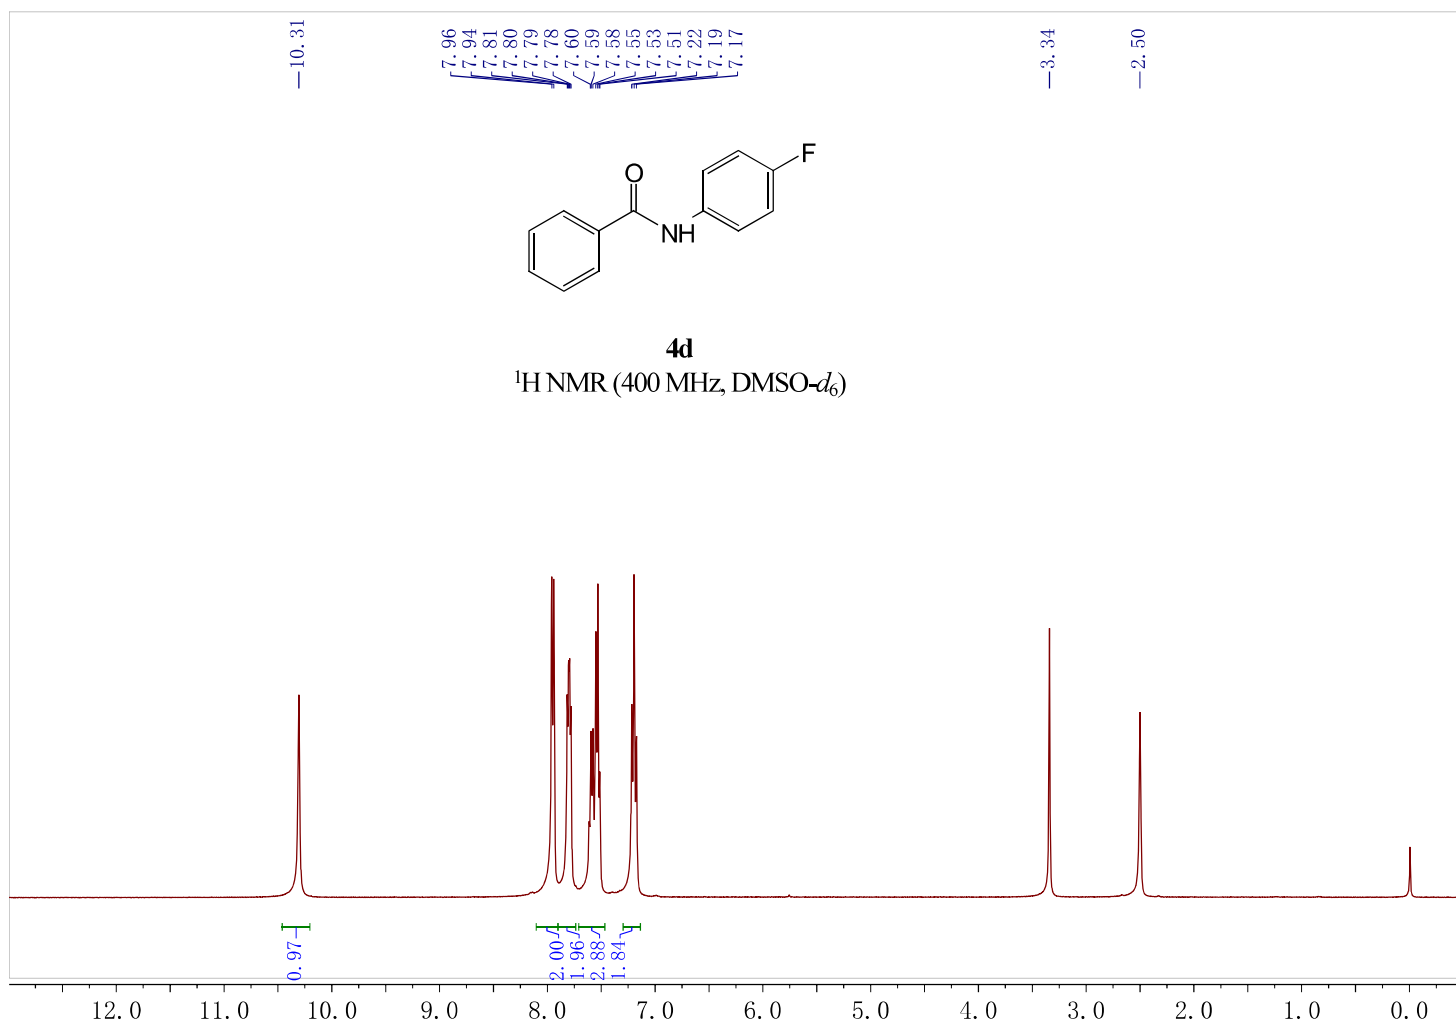

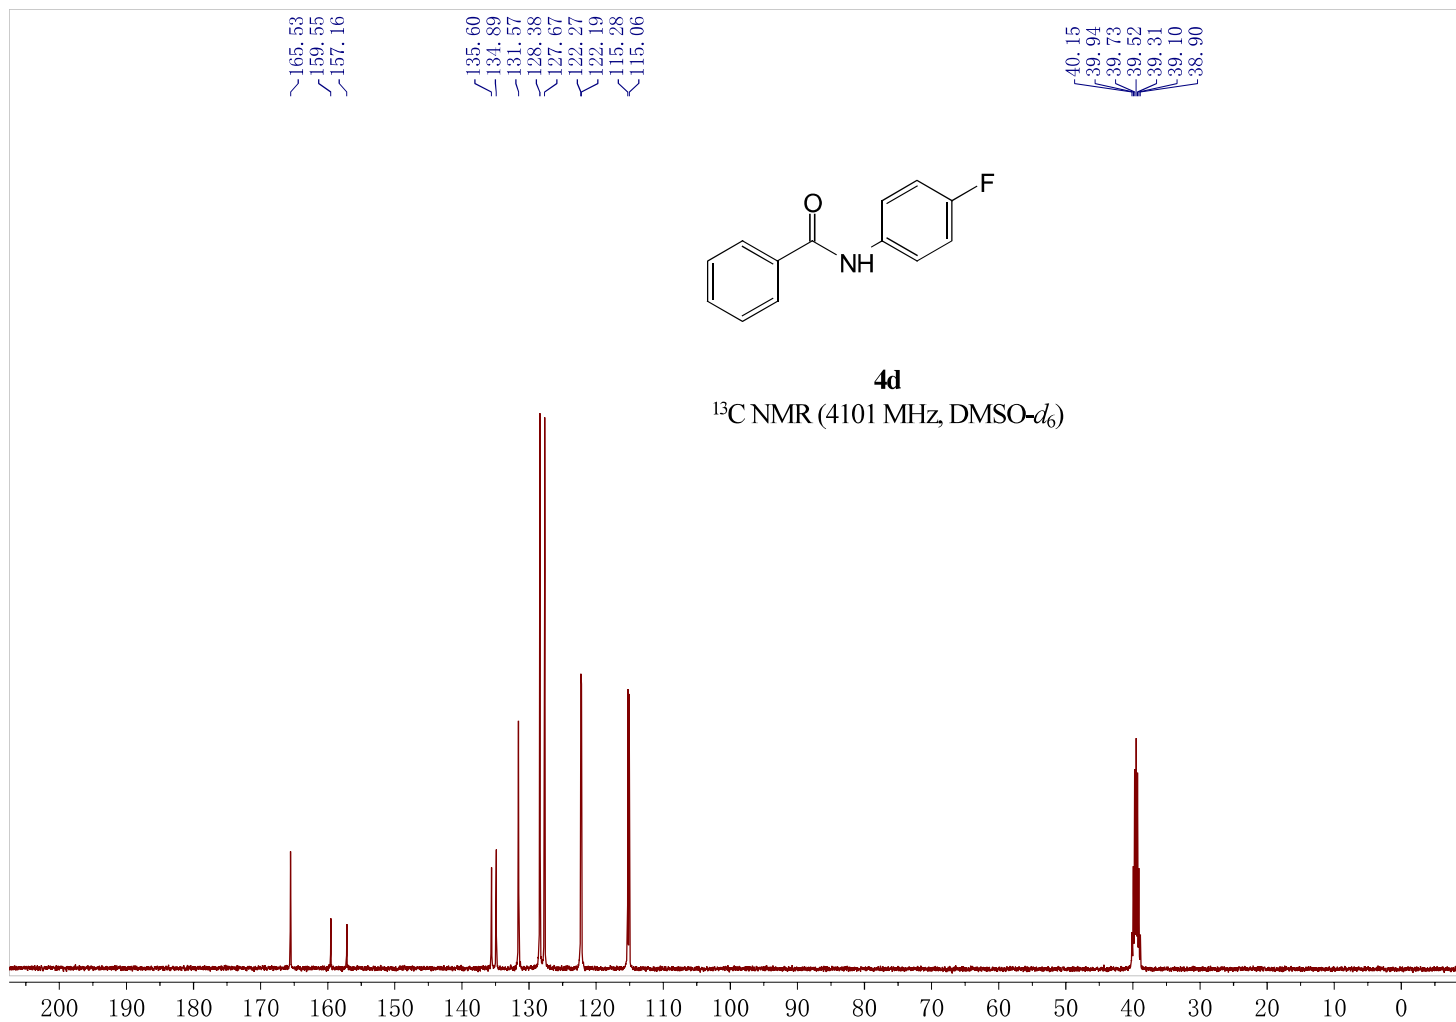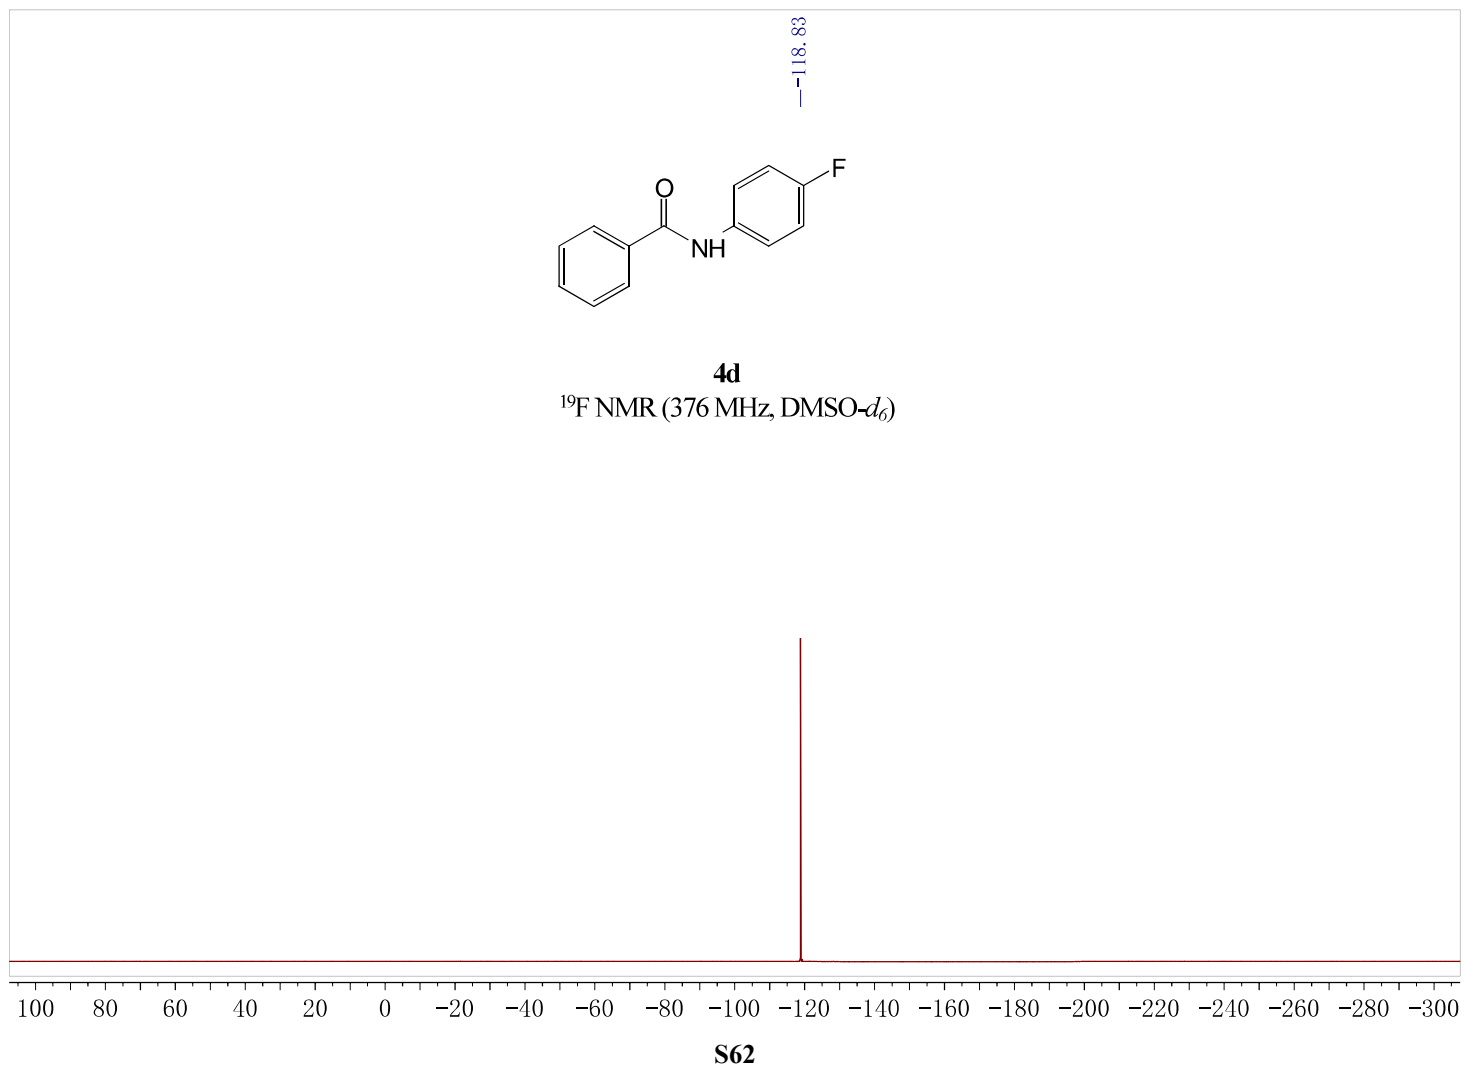

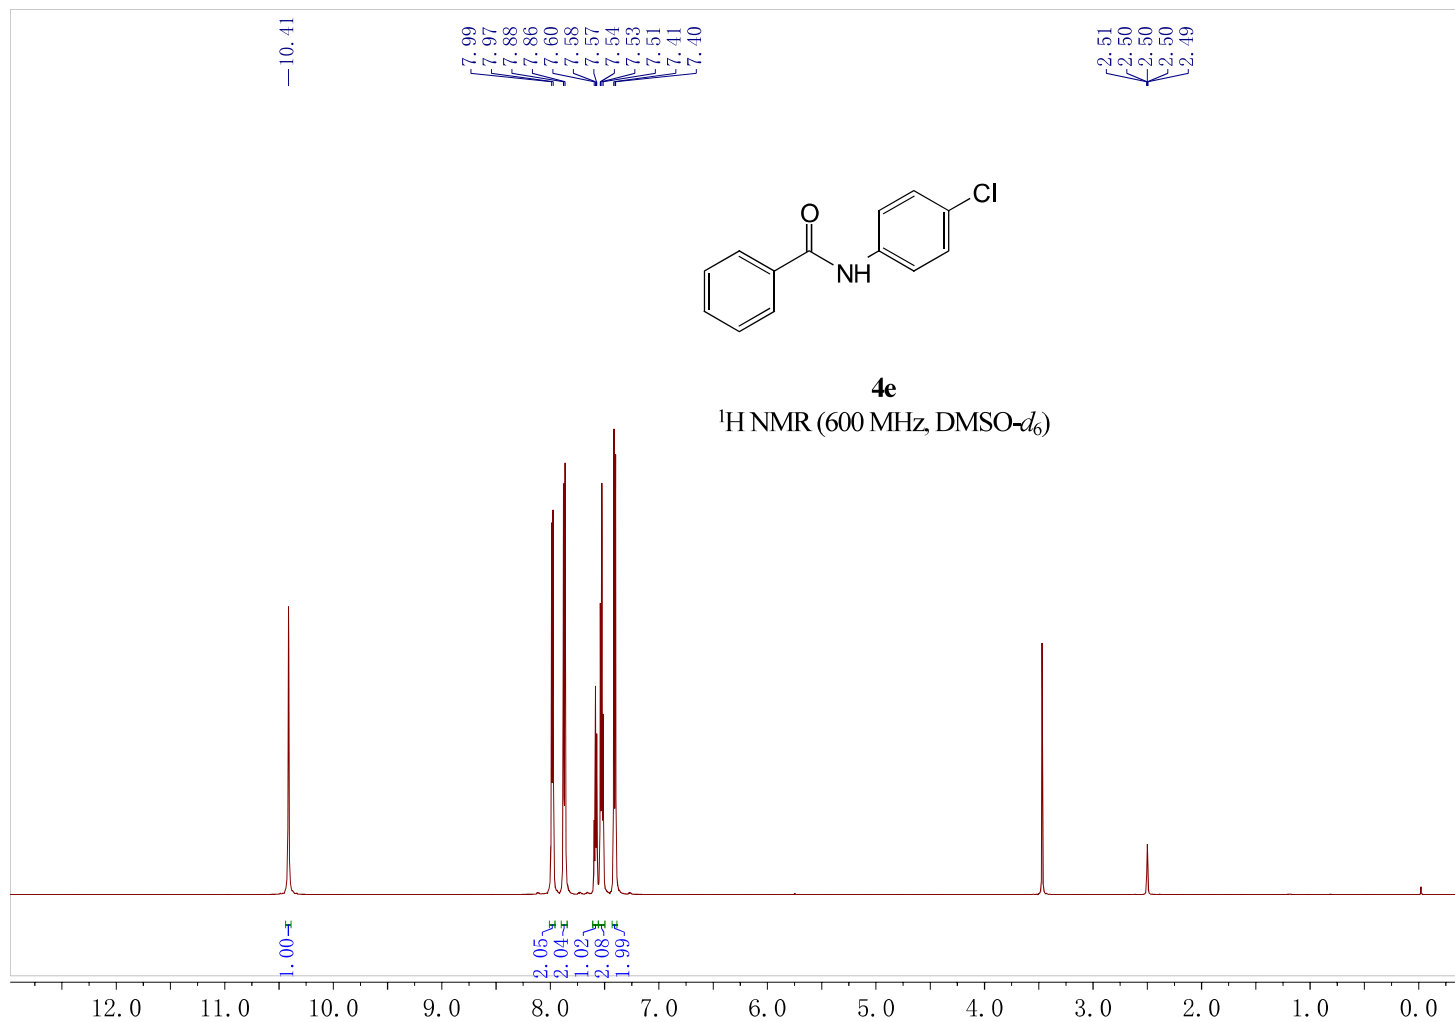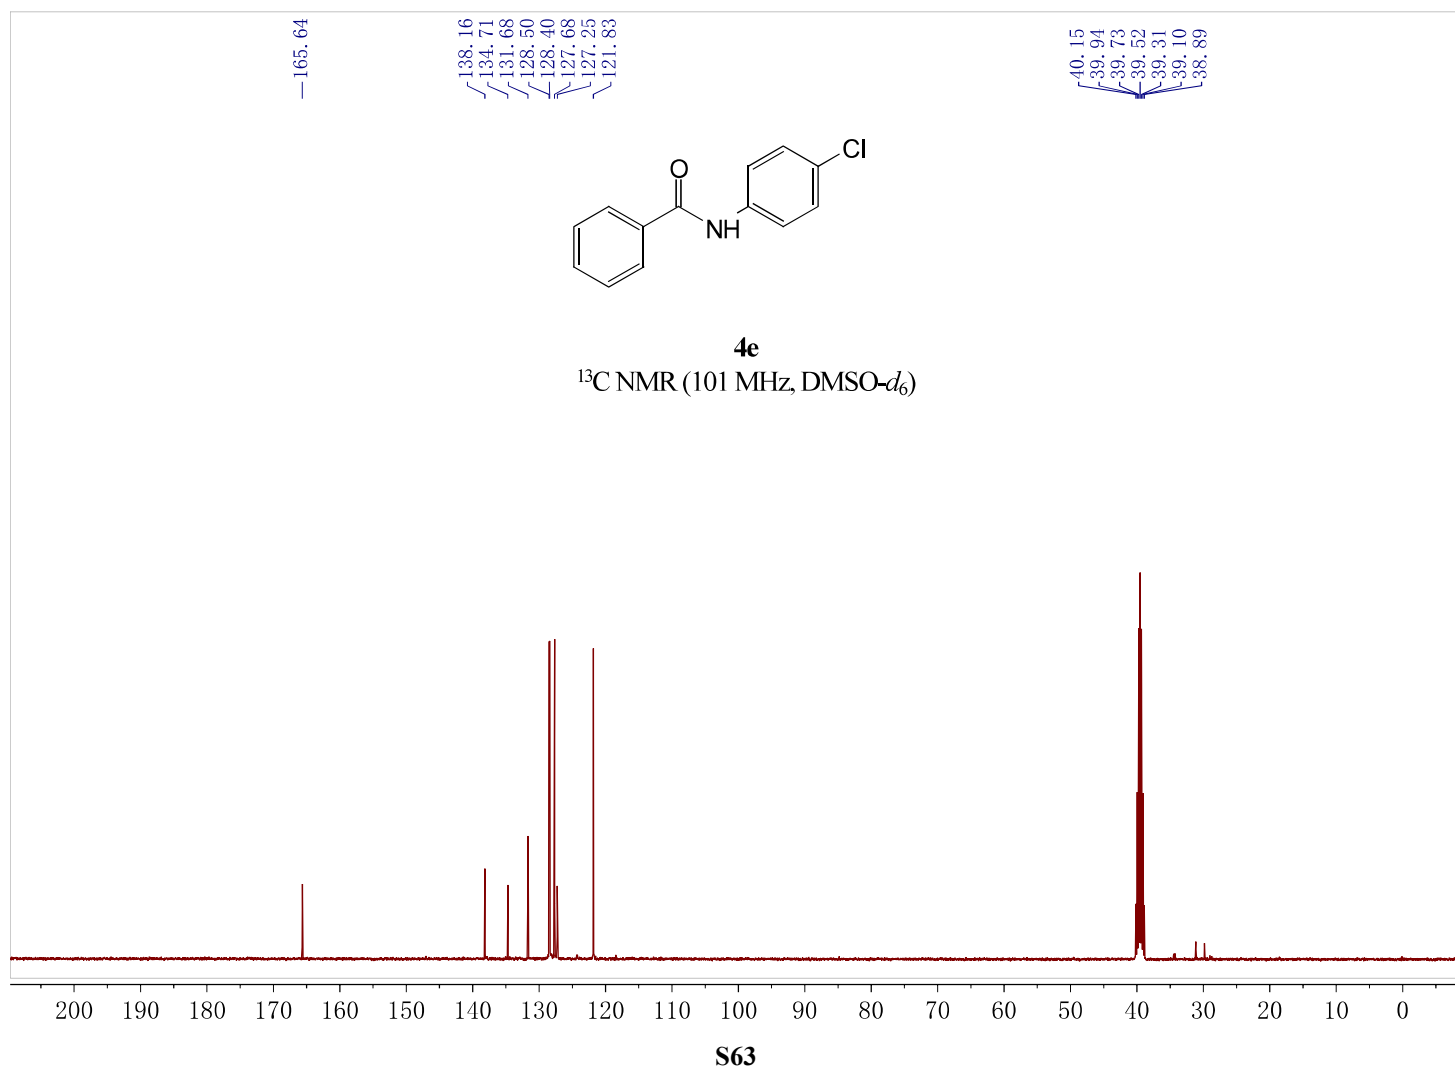

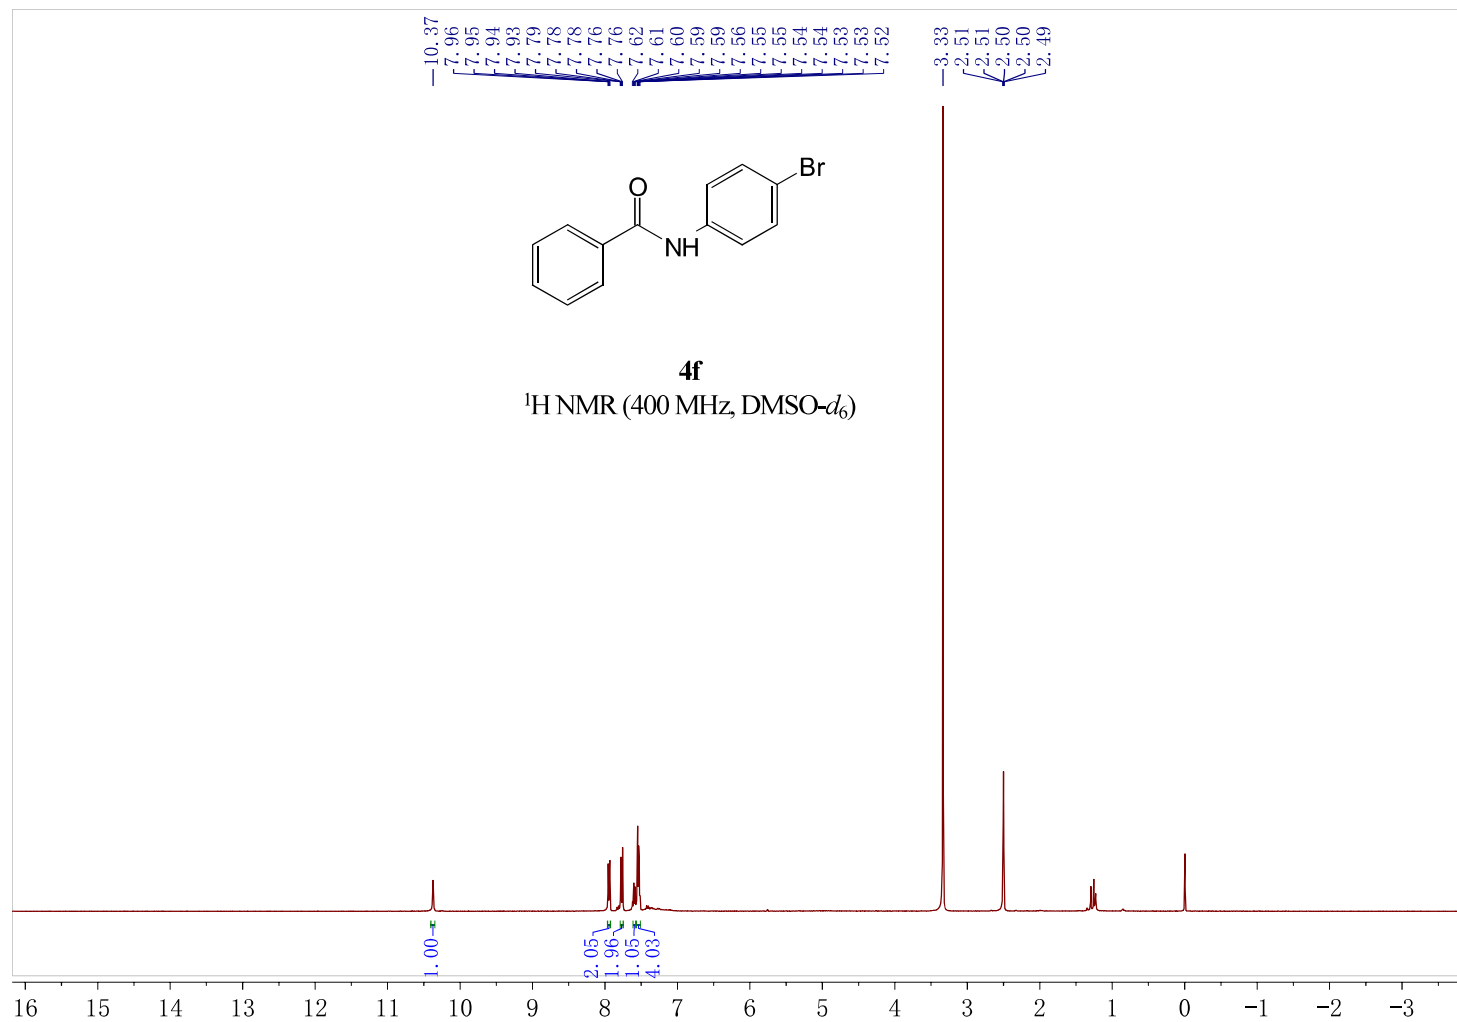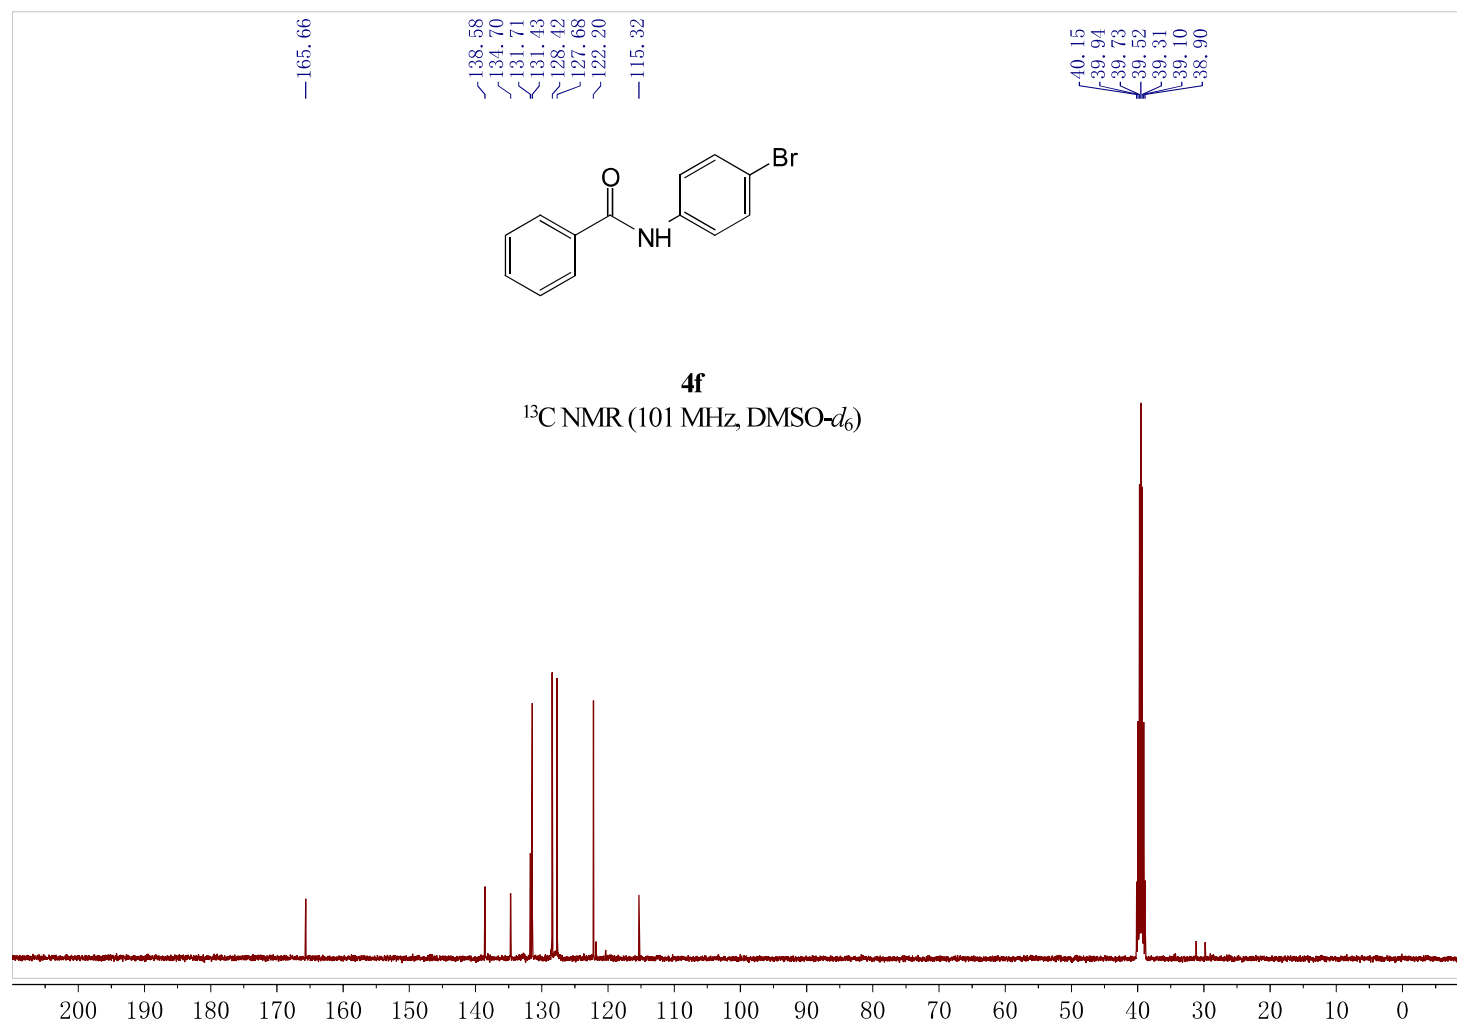



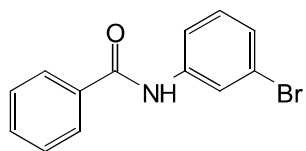

**4g**

<sup>1</sup>H NMR (400 MHz, CDCl<sub>3</sub>)

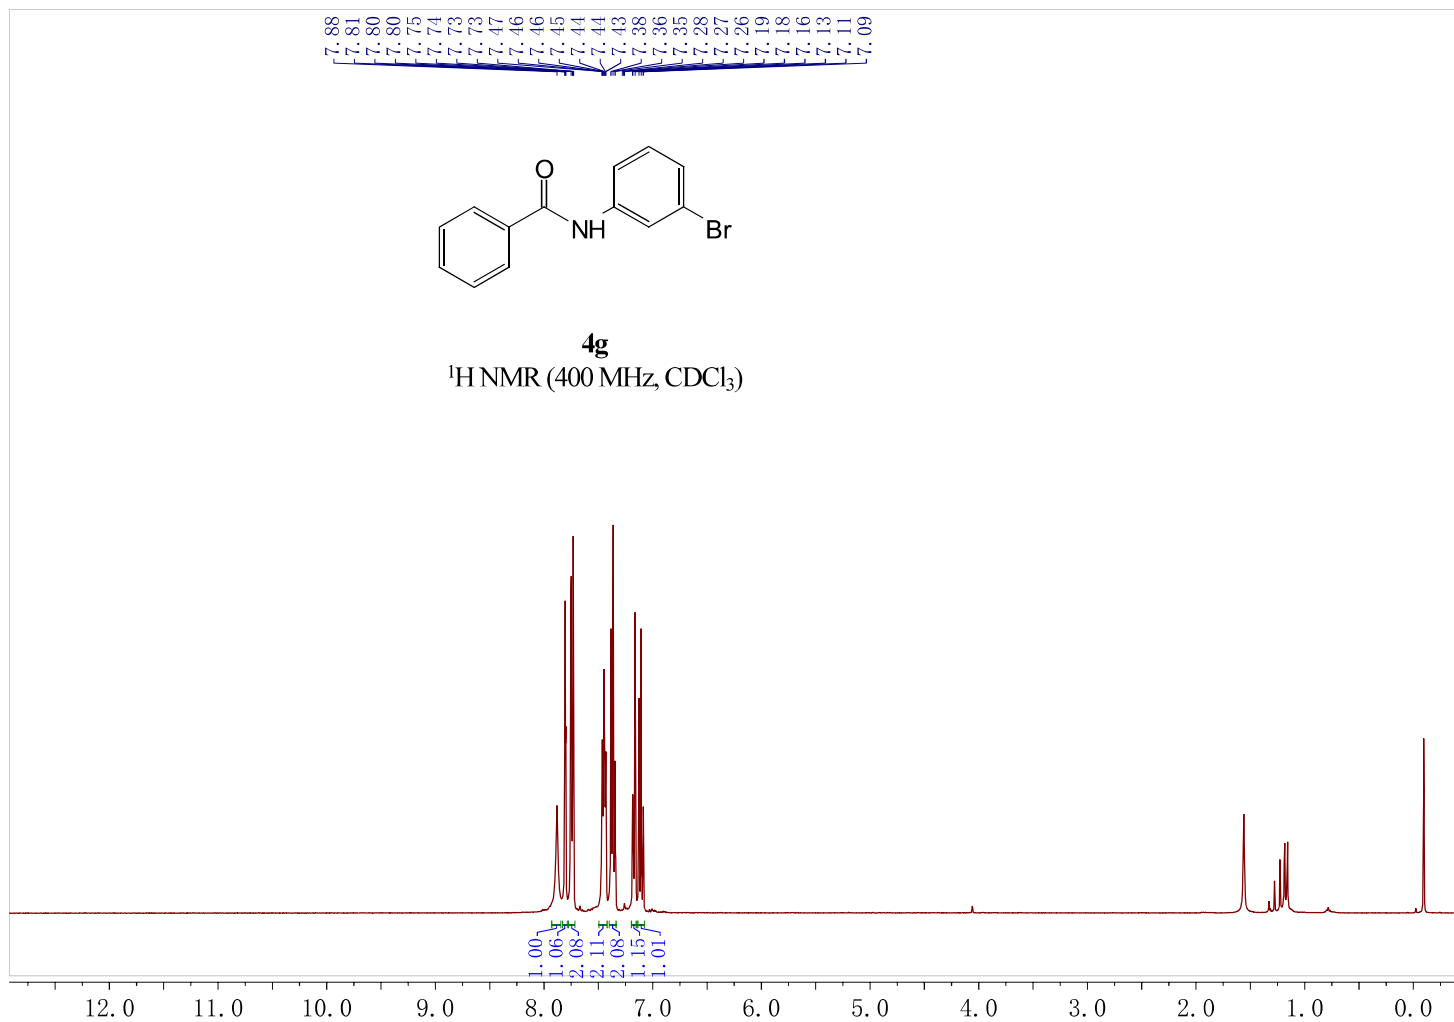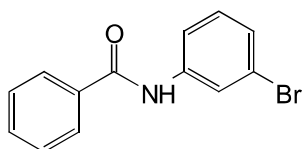

**4g**

<sup>13</sup>C NMR (101 MHz, CDCl<sub>3</sub>)

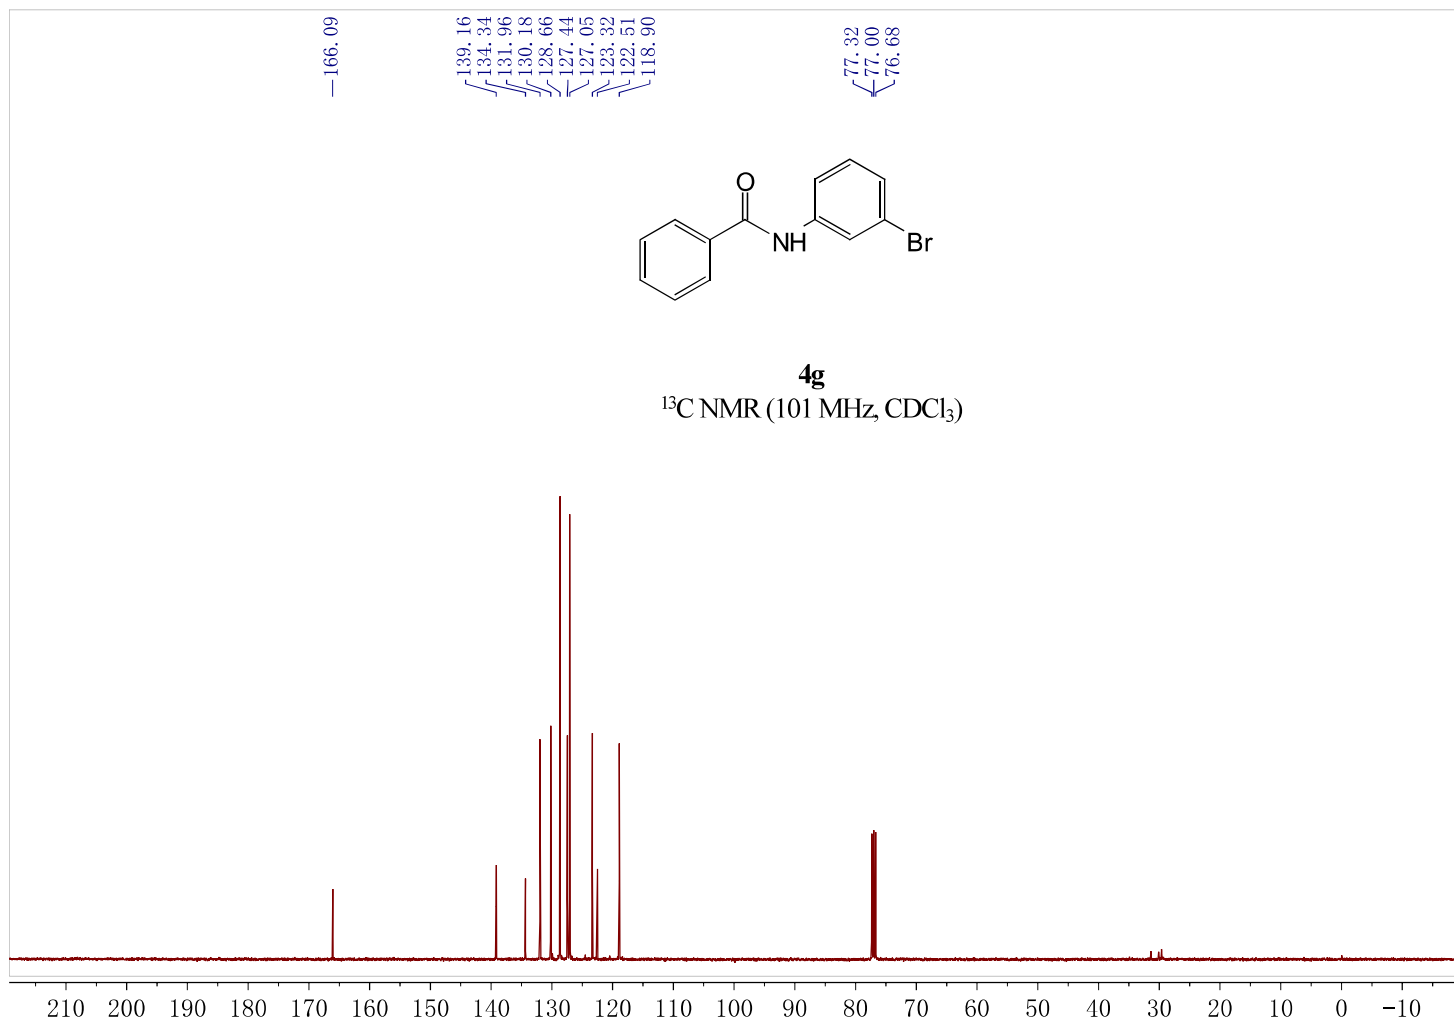

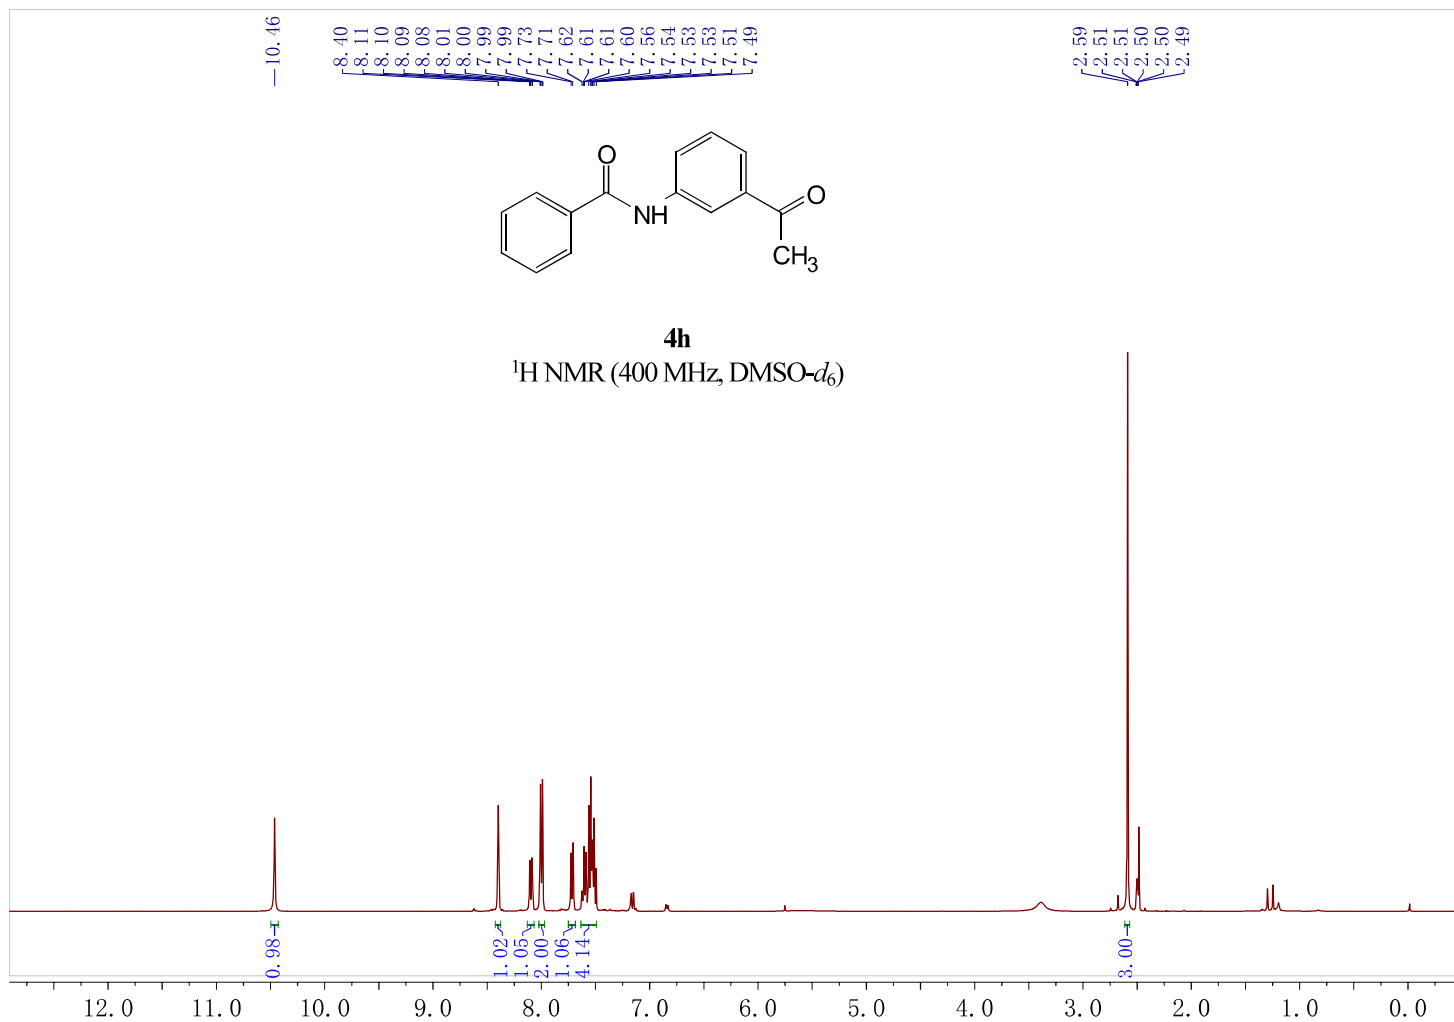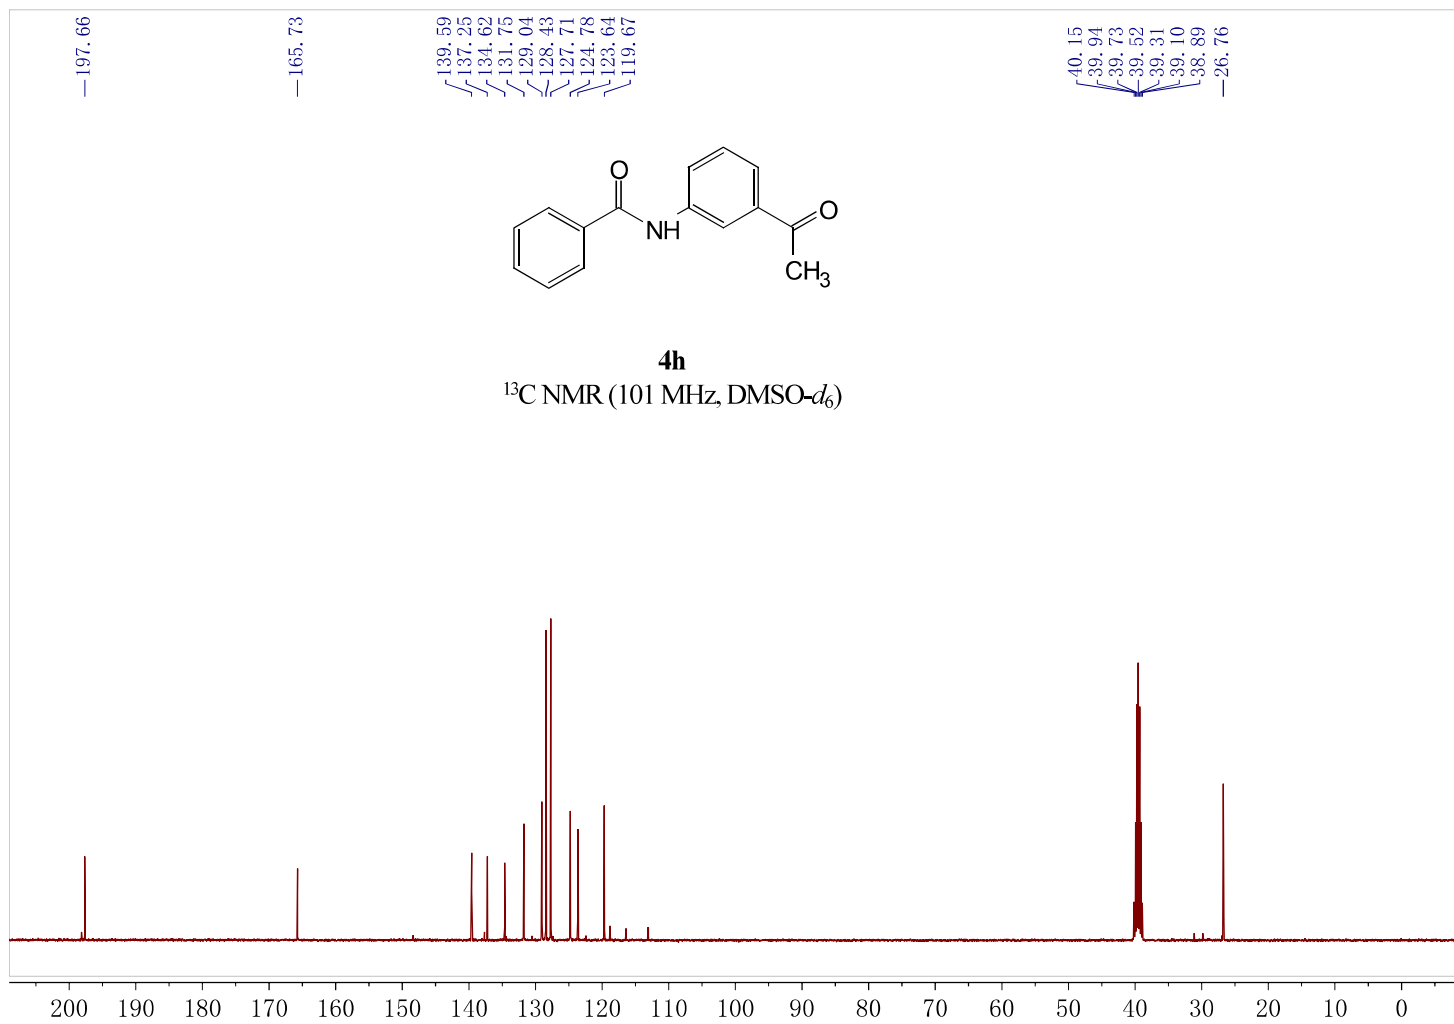

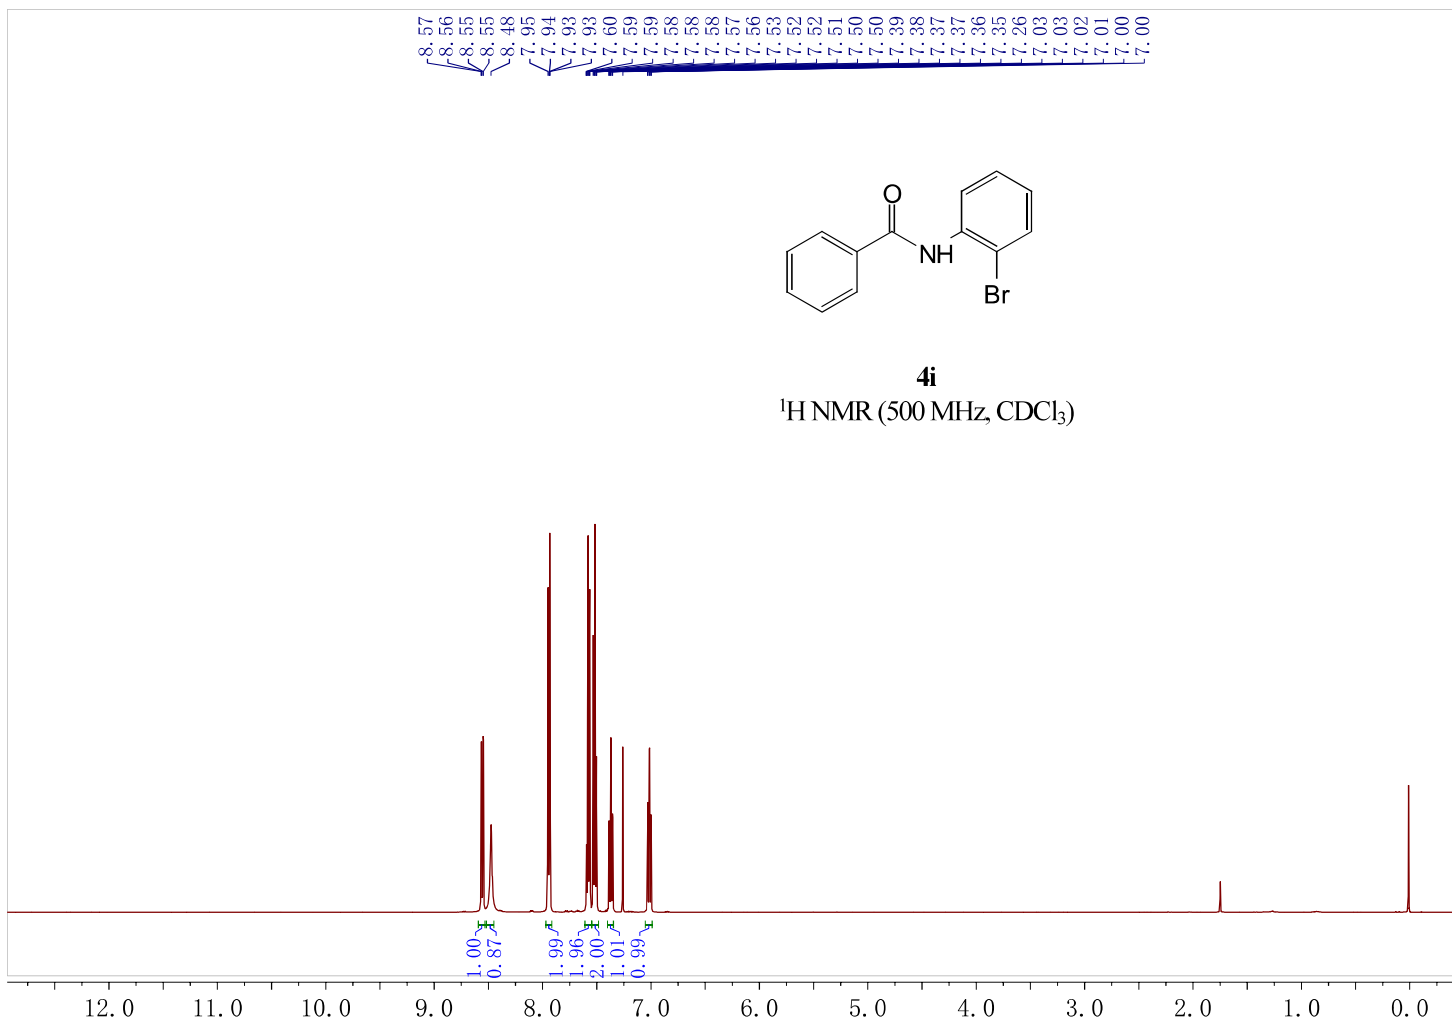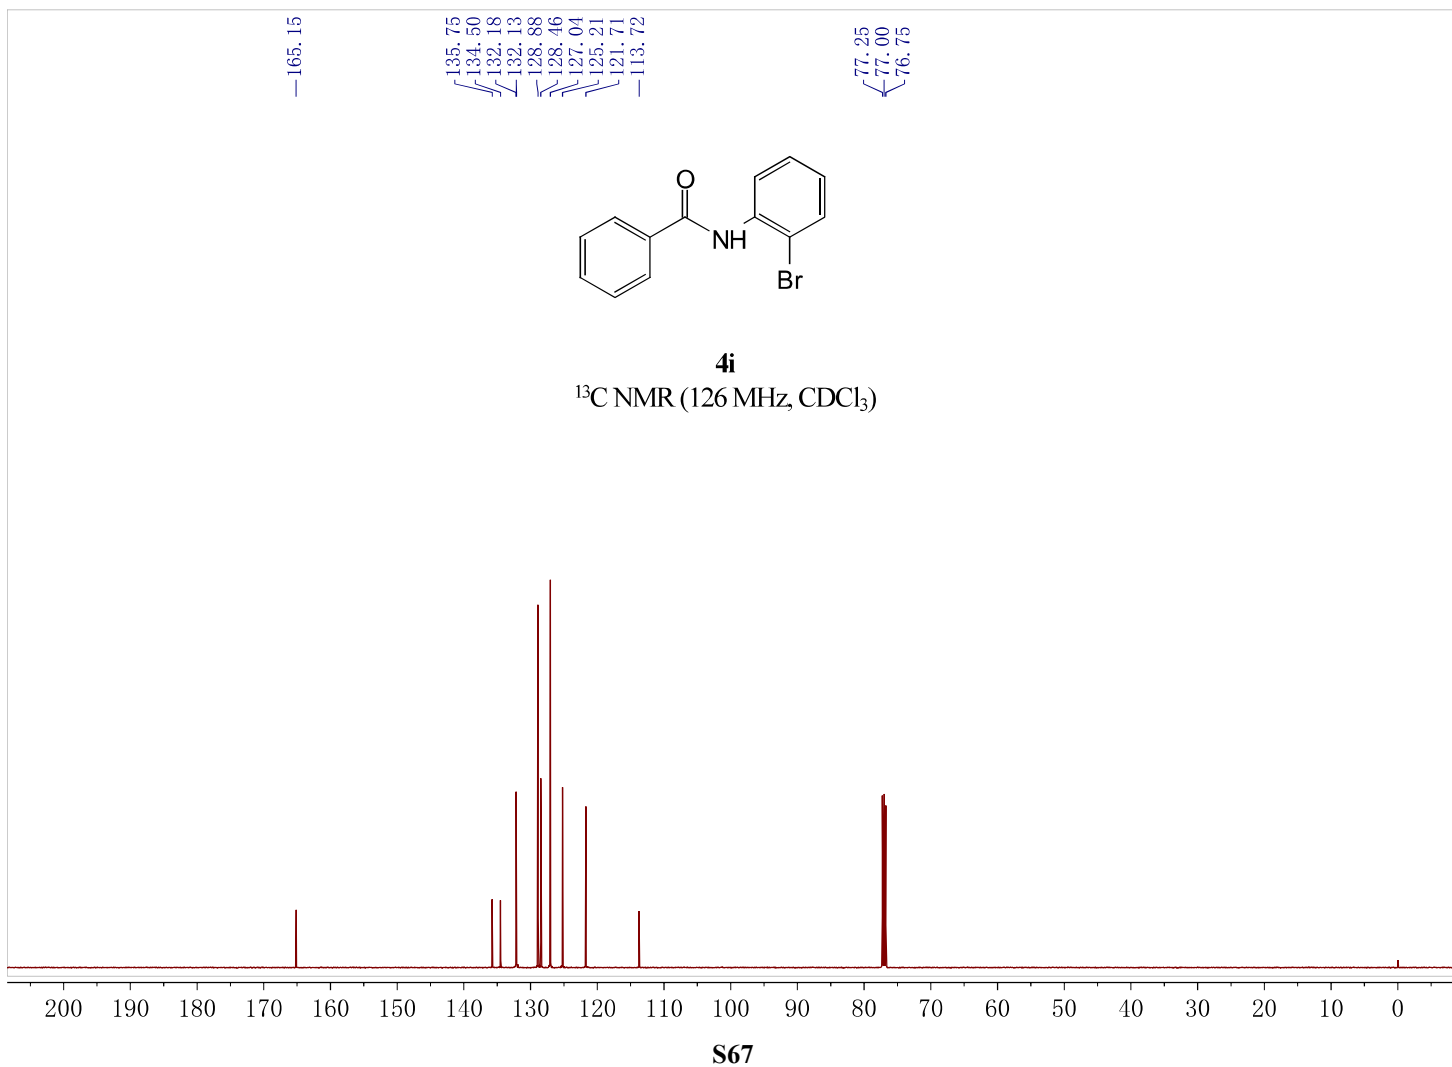

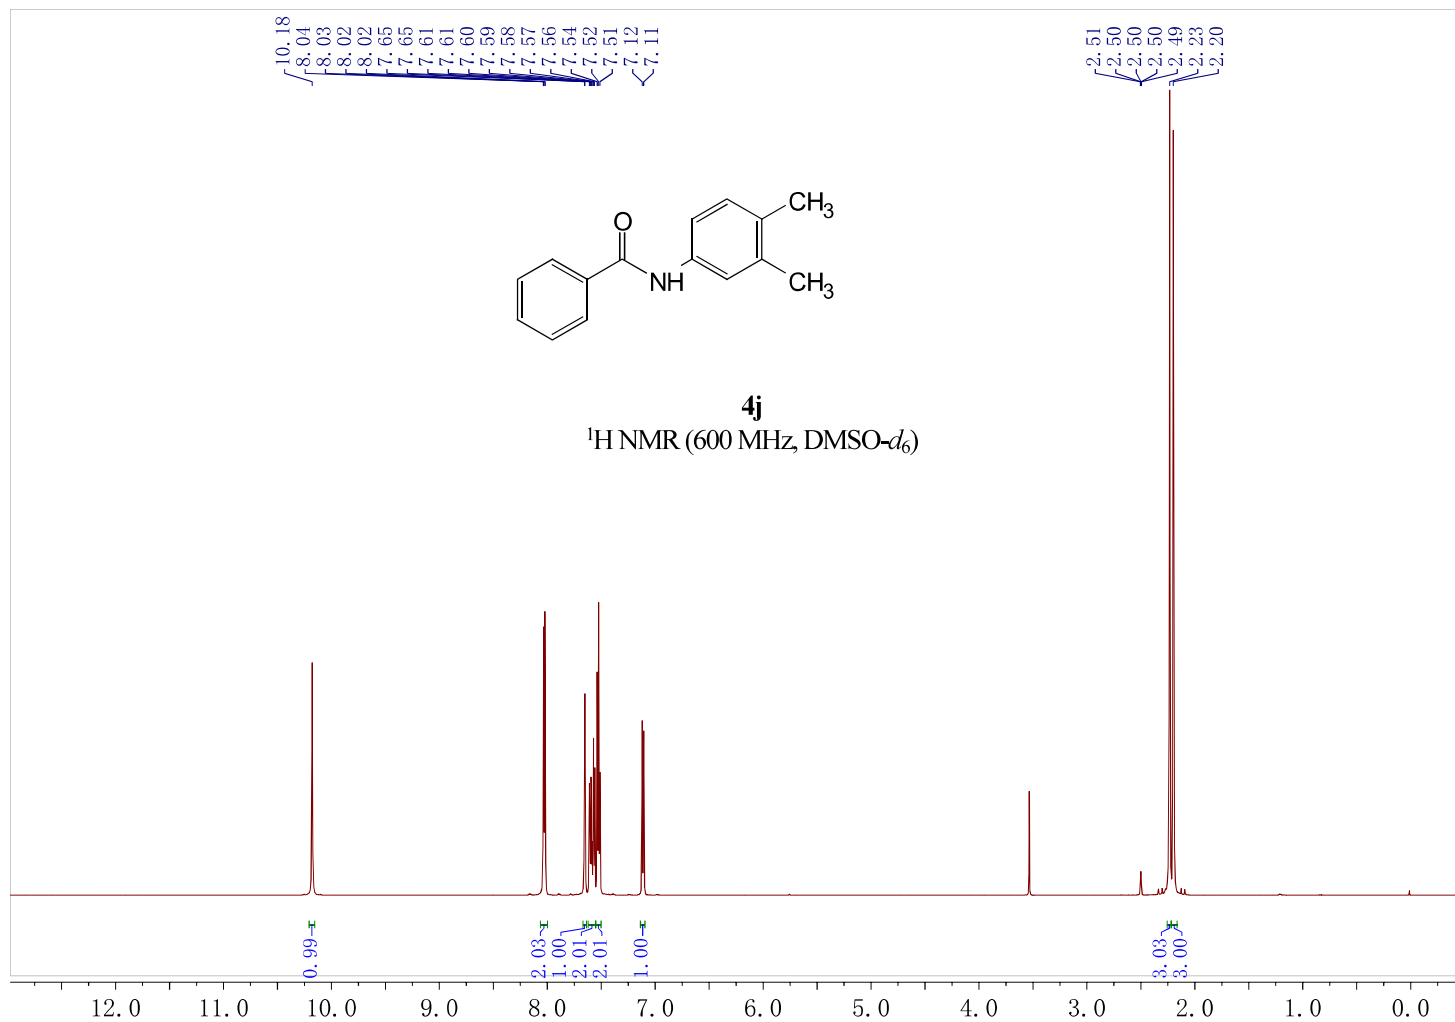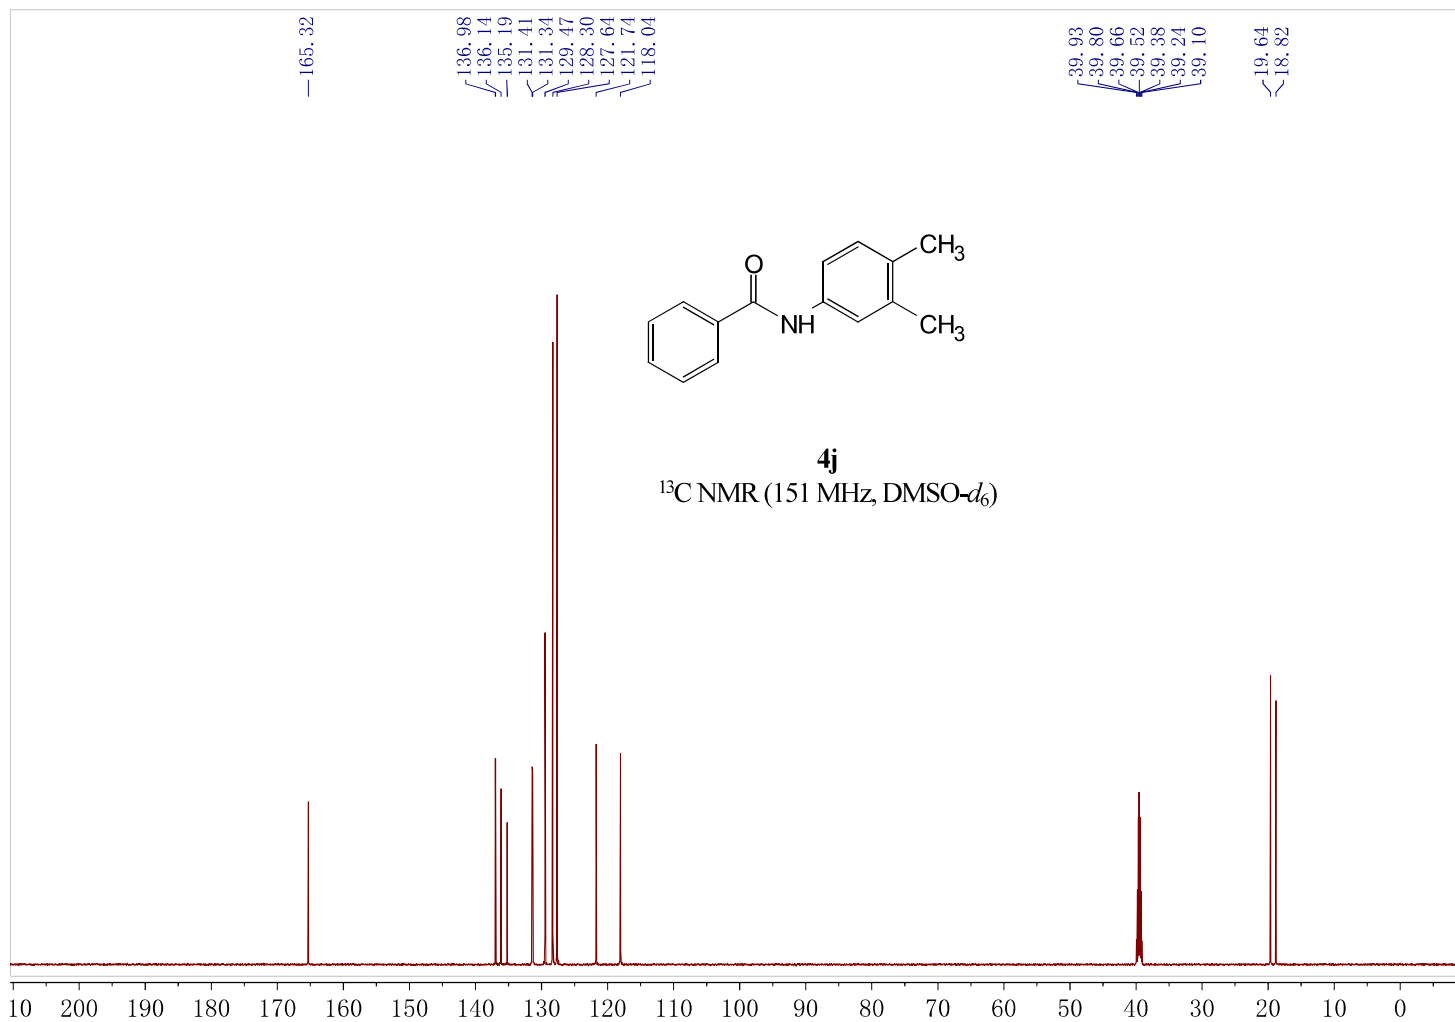

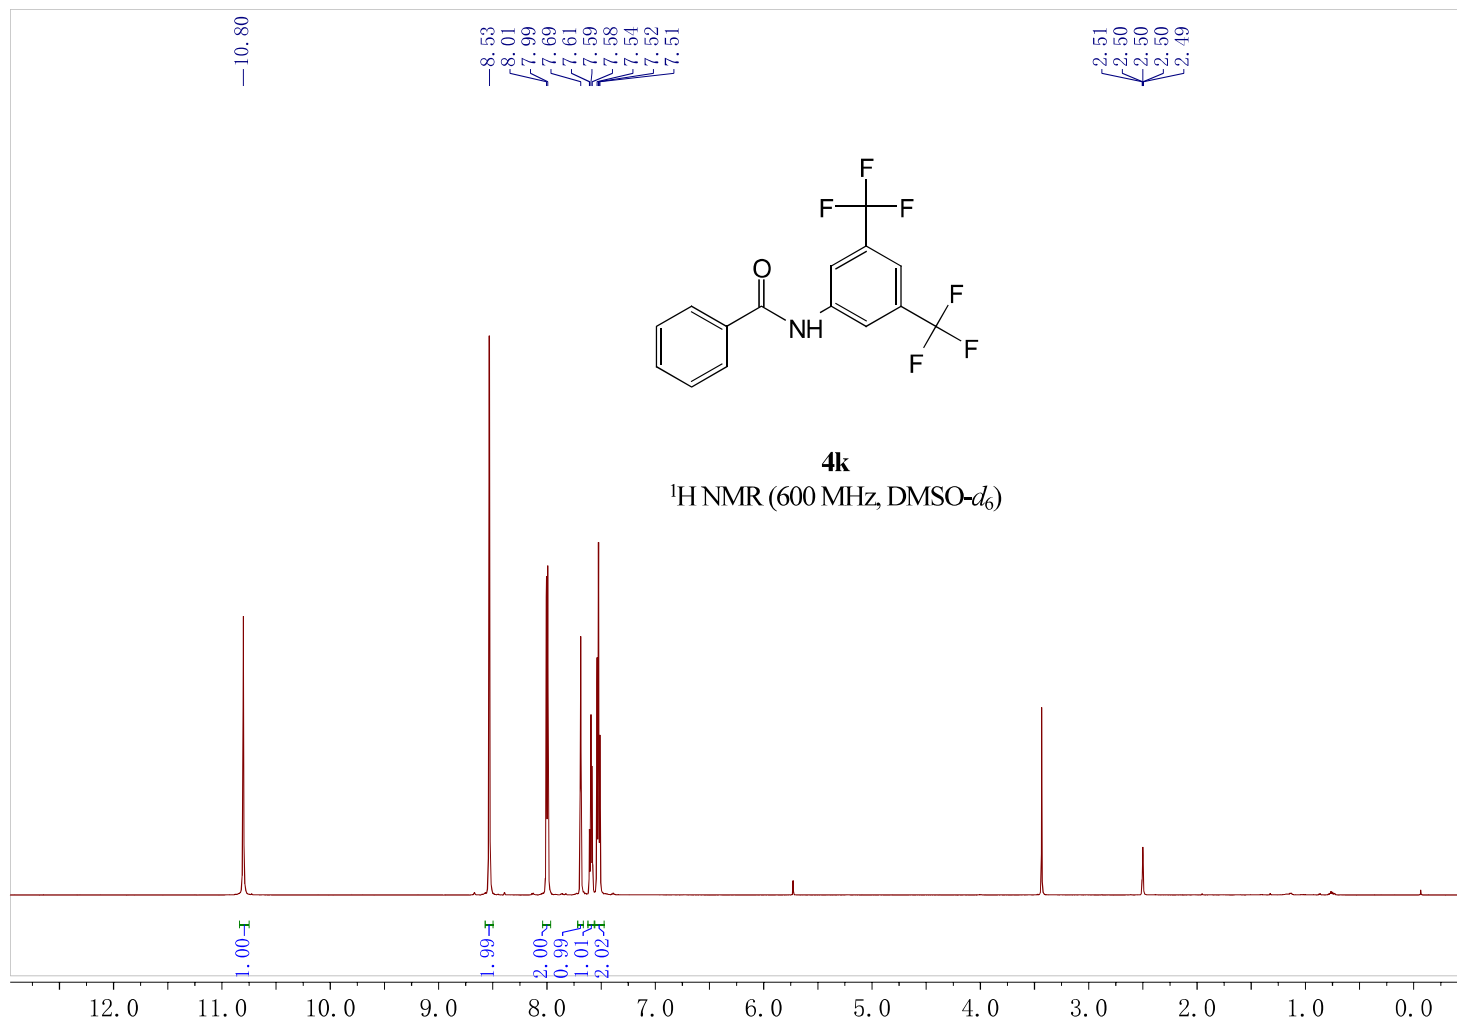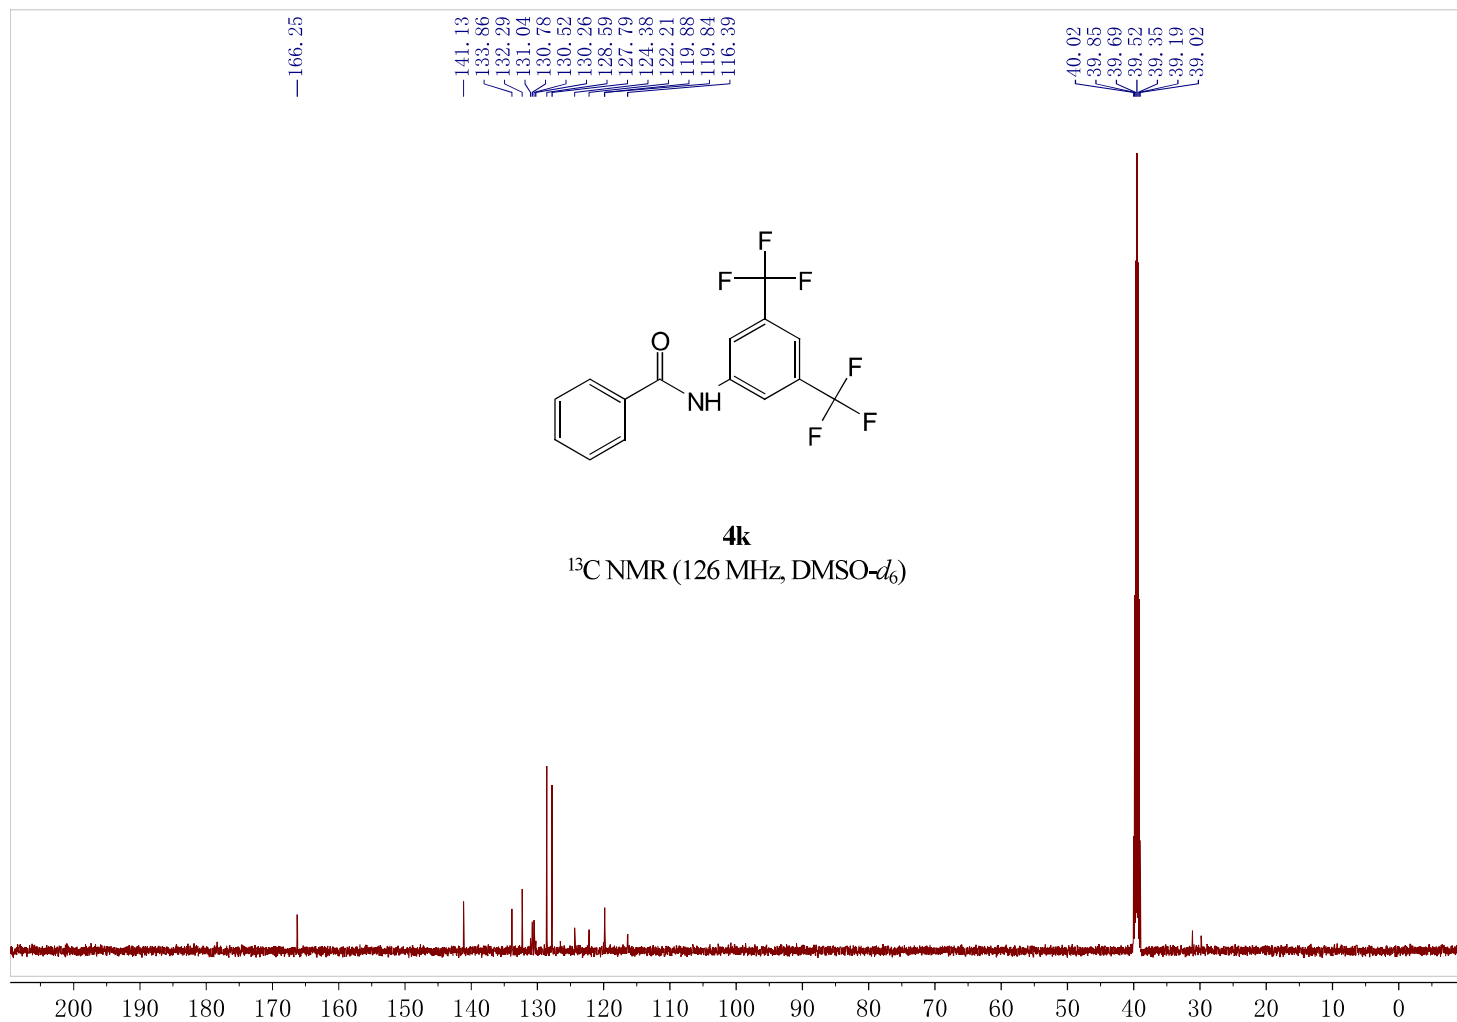

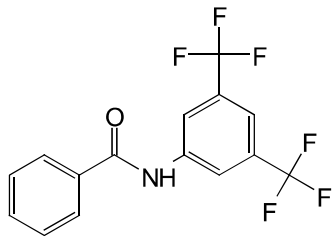

4k

$^{19}\text{F}$  NMR (376 MHz,  $\text{DMSO-}d_6$ )

-62.99

100 80 60 40 20 0 -20 -40 -60 -80 -100 -120 -140 -160 -180 -200 -220 -240 -260 -280 -300

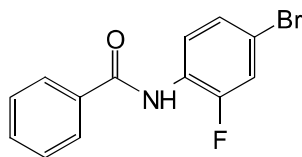

4l

$^1\text{H}$  NMR (600 MHz,  $\text{DMSO-}d_6$ )

-10.23

8.02  
8.01  
7.65  
7.64  
7.63  
7.63  
7.62  
7.60  
7.59  
7.55  
7.53  
7.52  
7.45  
7.44  
7.43  
7.43

2.51  
2.51  
2.50  
2.50

1.00

2.02

3.00

2.00

1.00

12.0 11.0 10.0 9.0 8.0 7.0 6.0 5.0 4.0 3.0 2.0 1.0 0.0

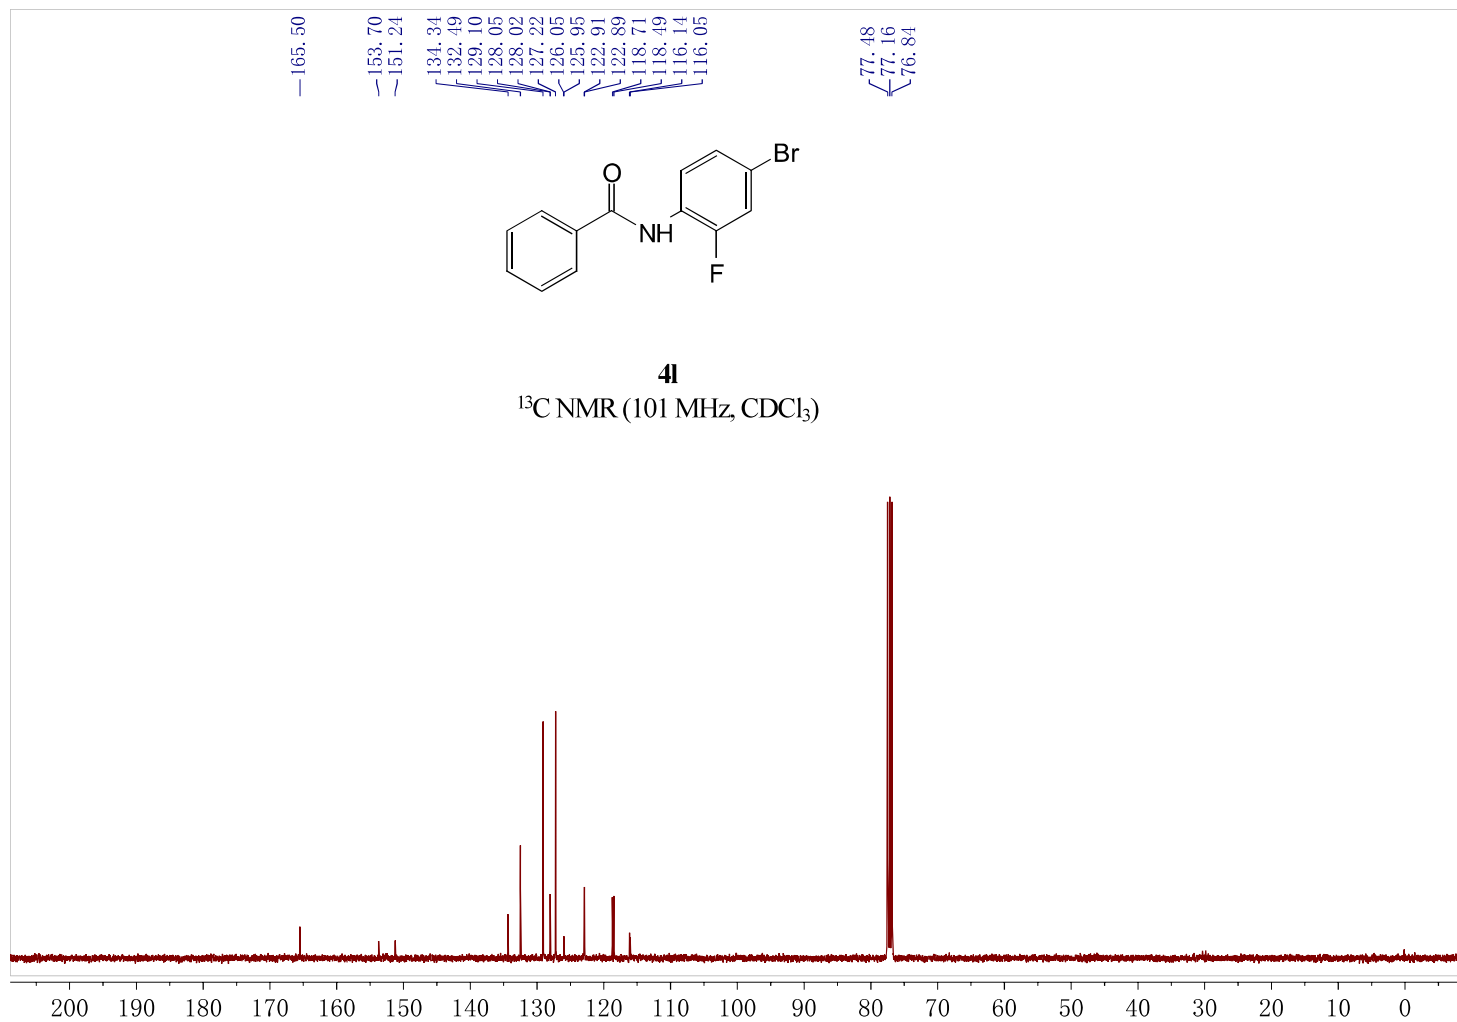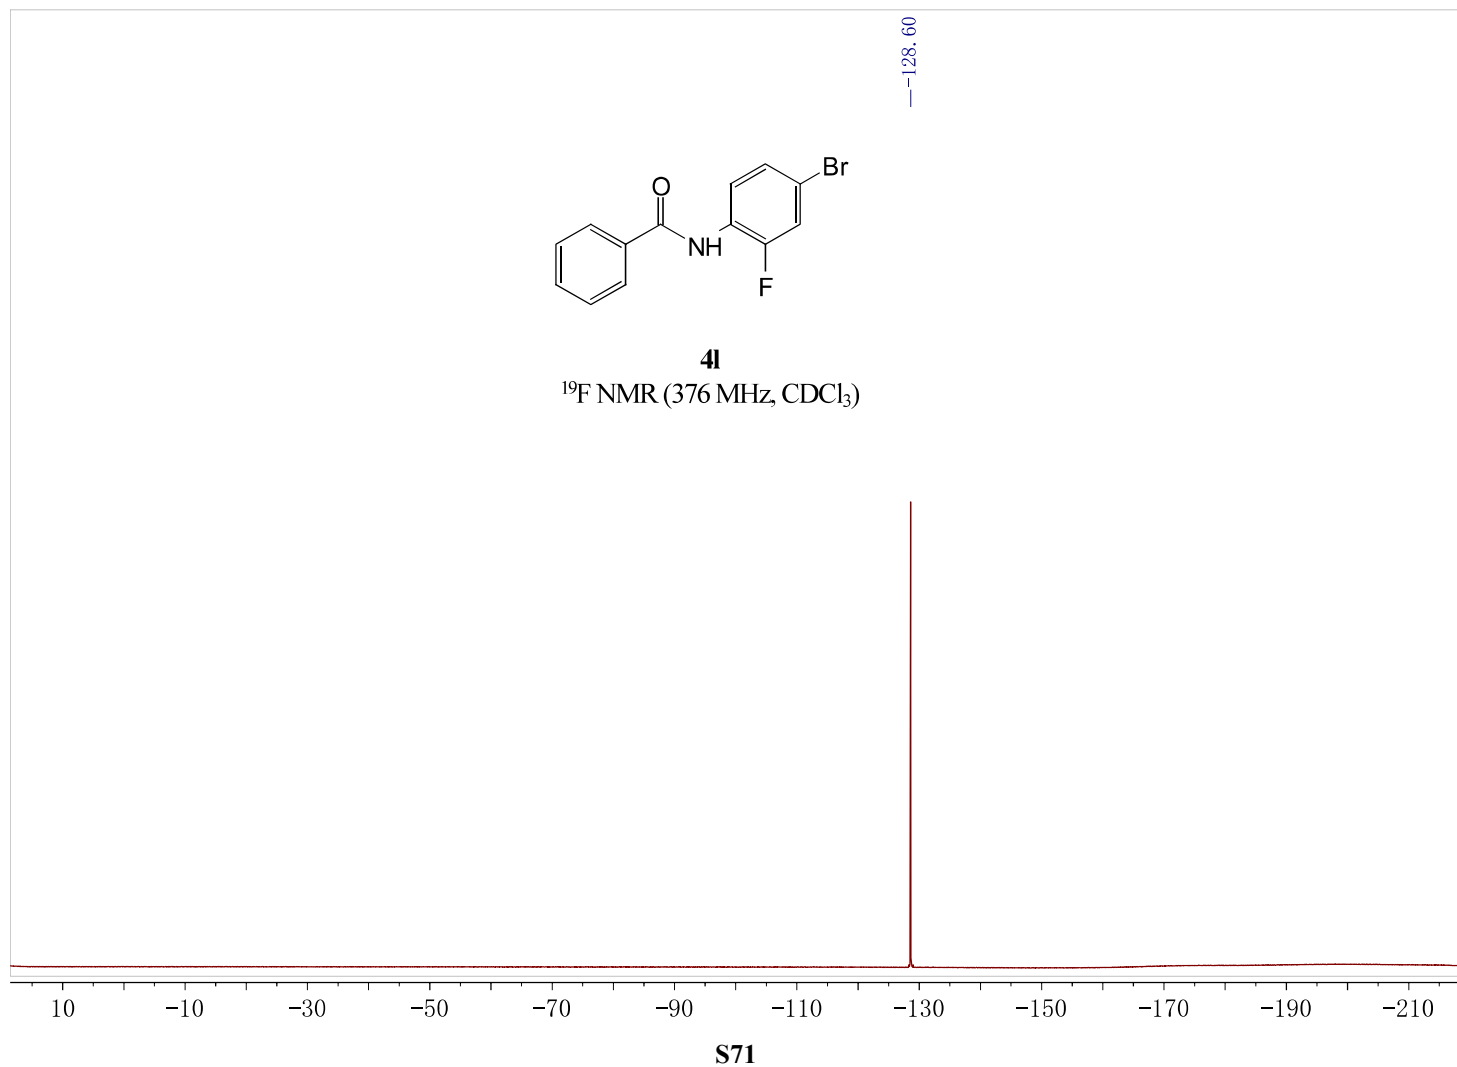

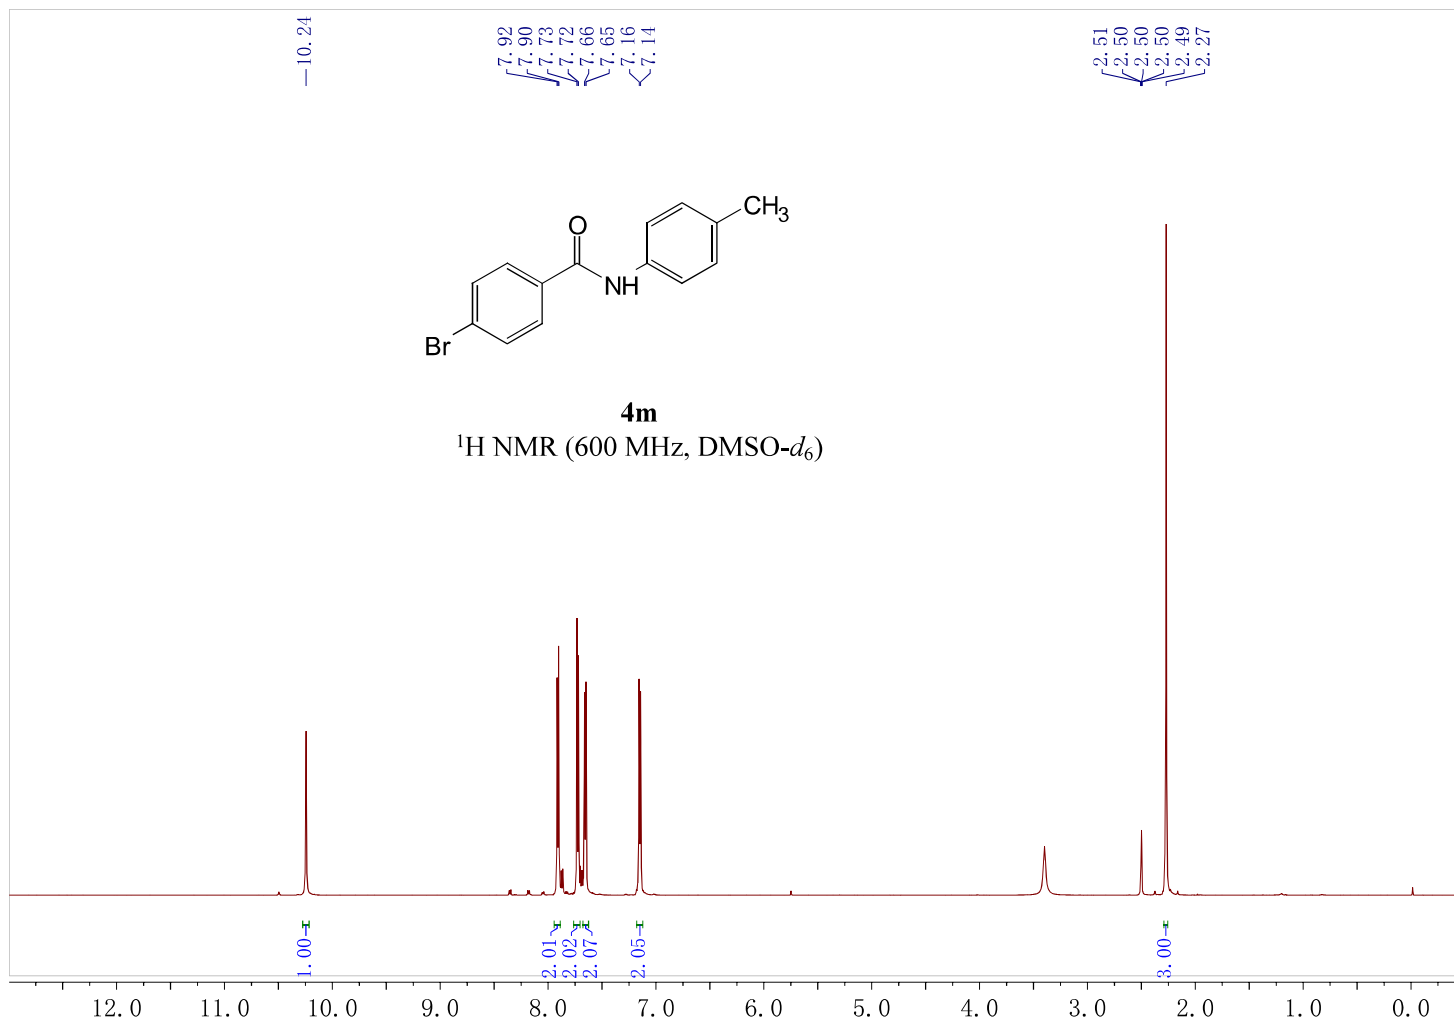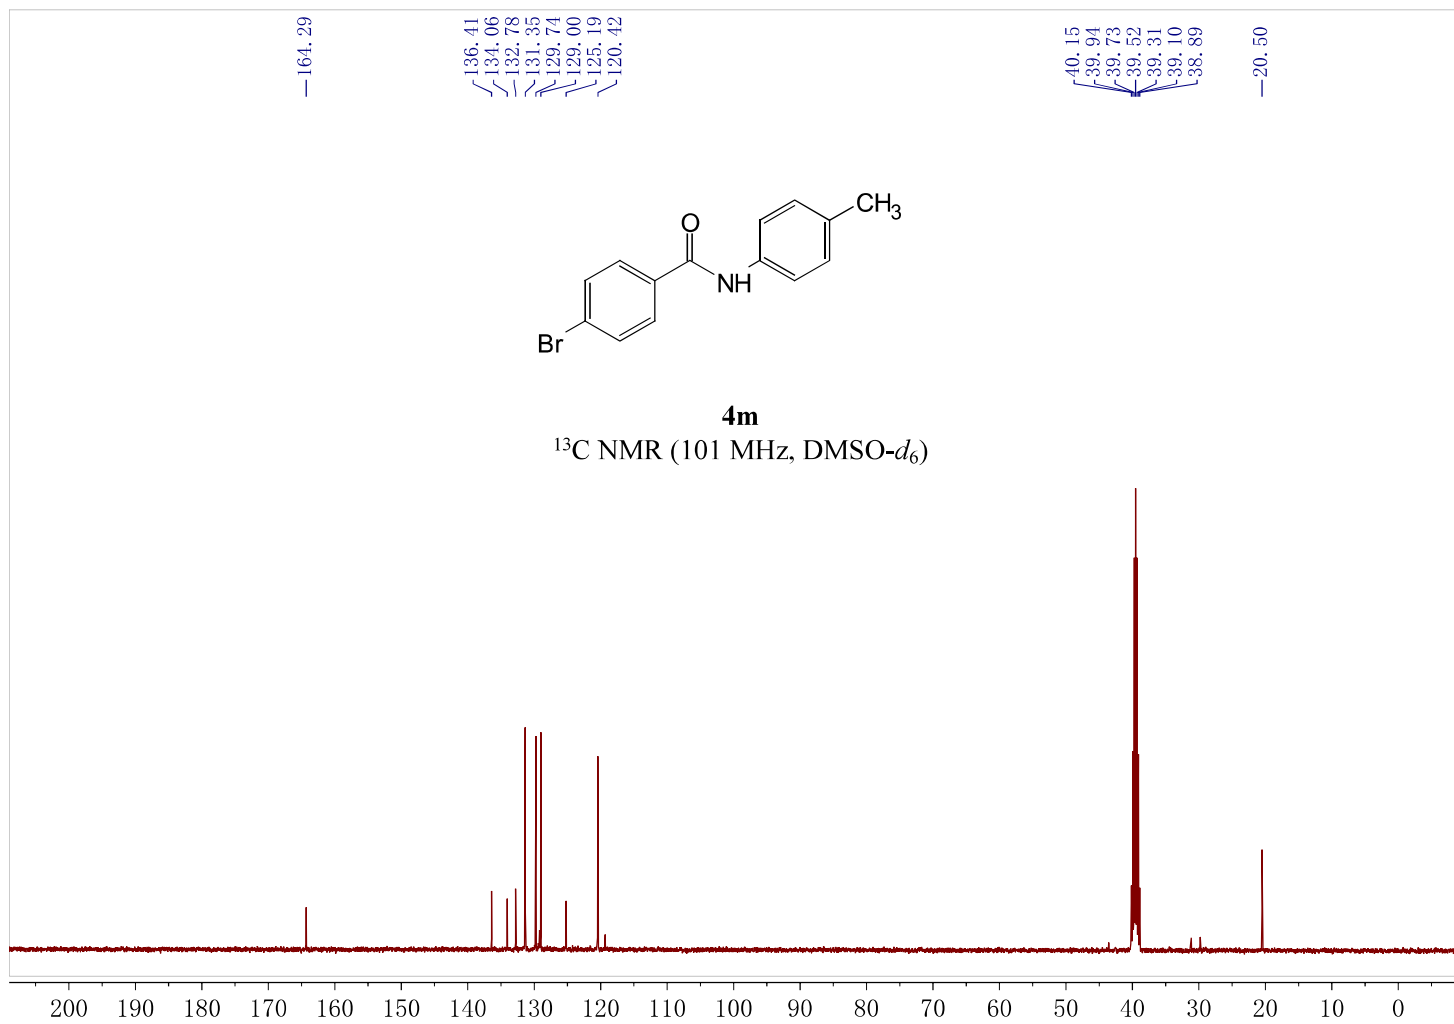



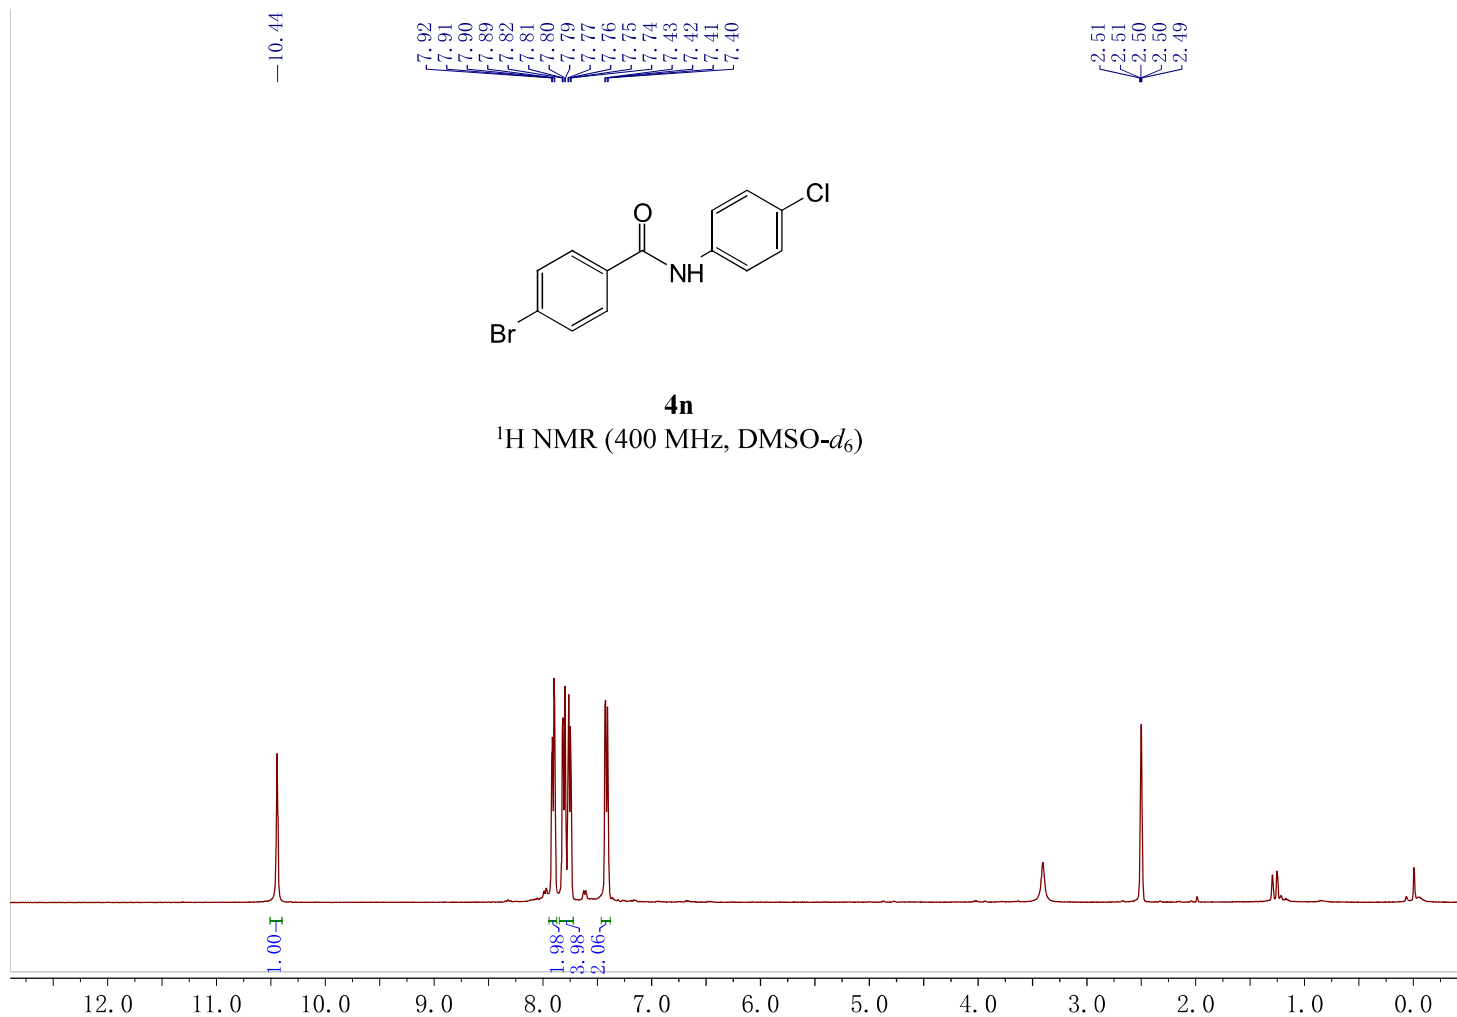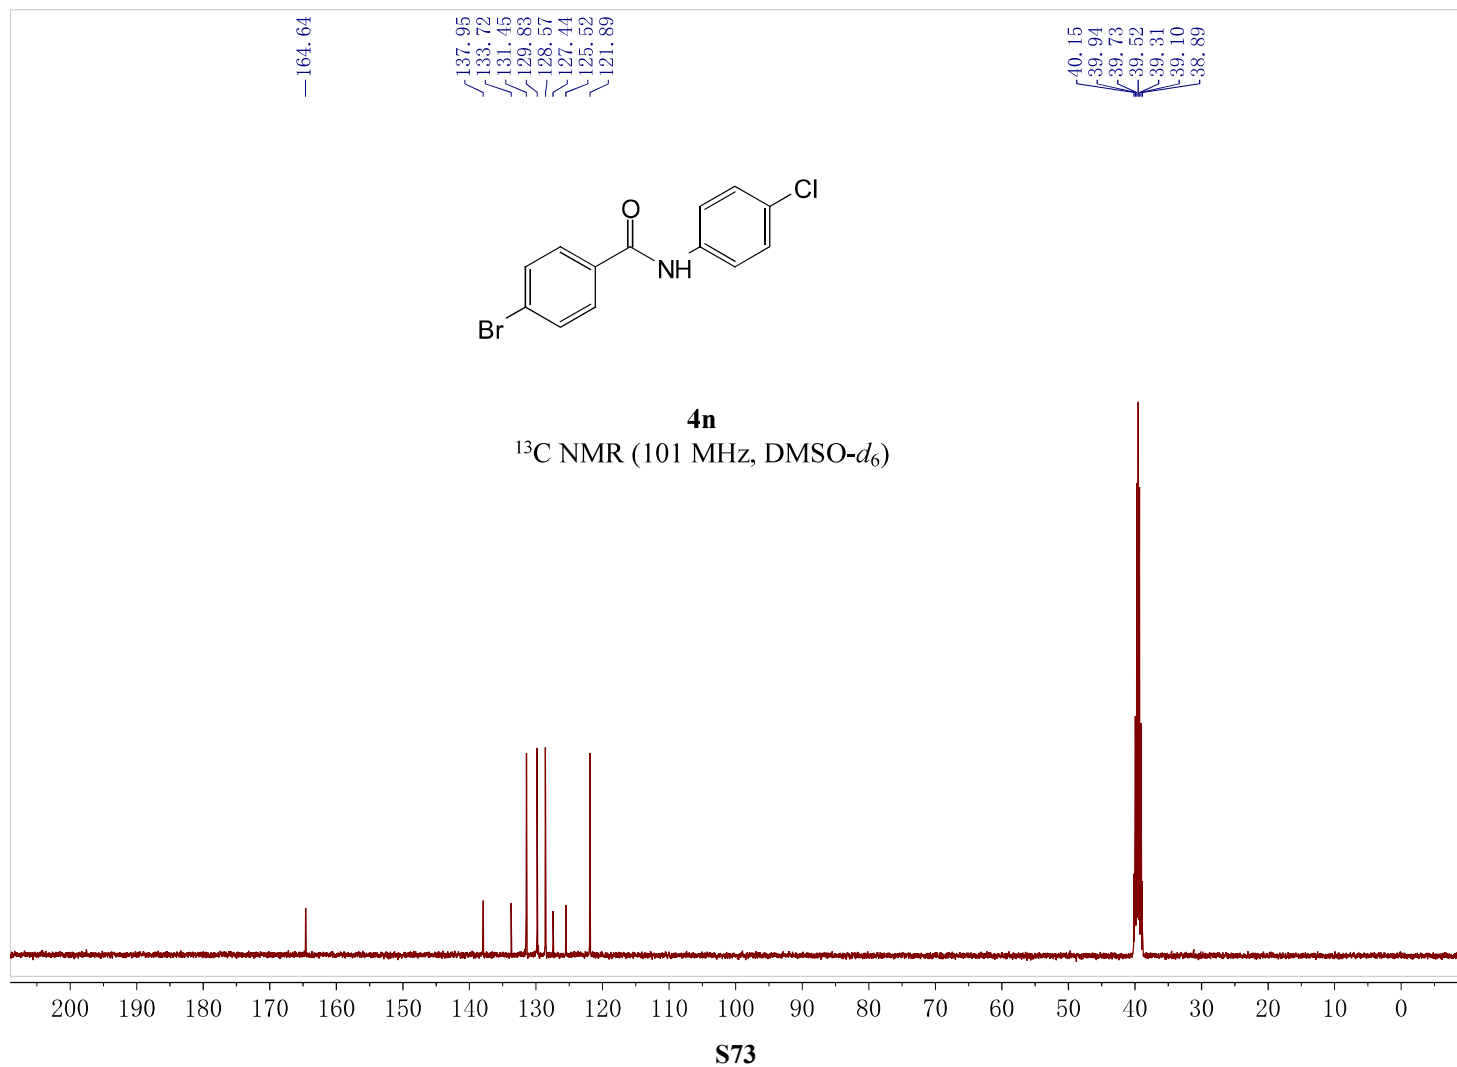

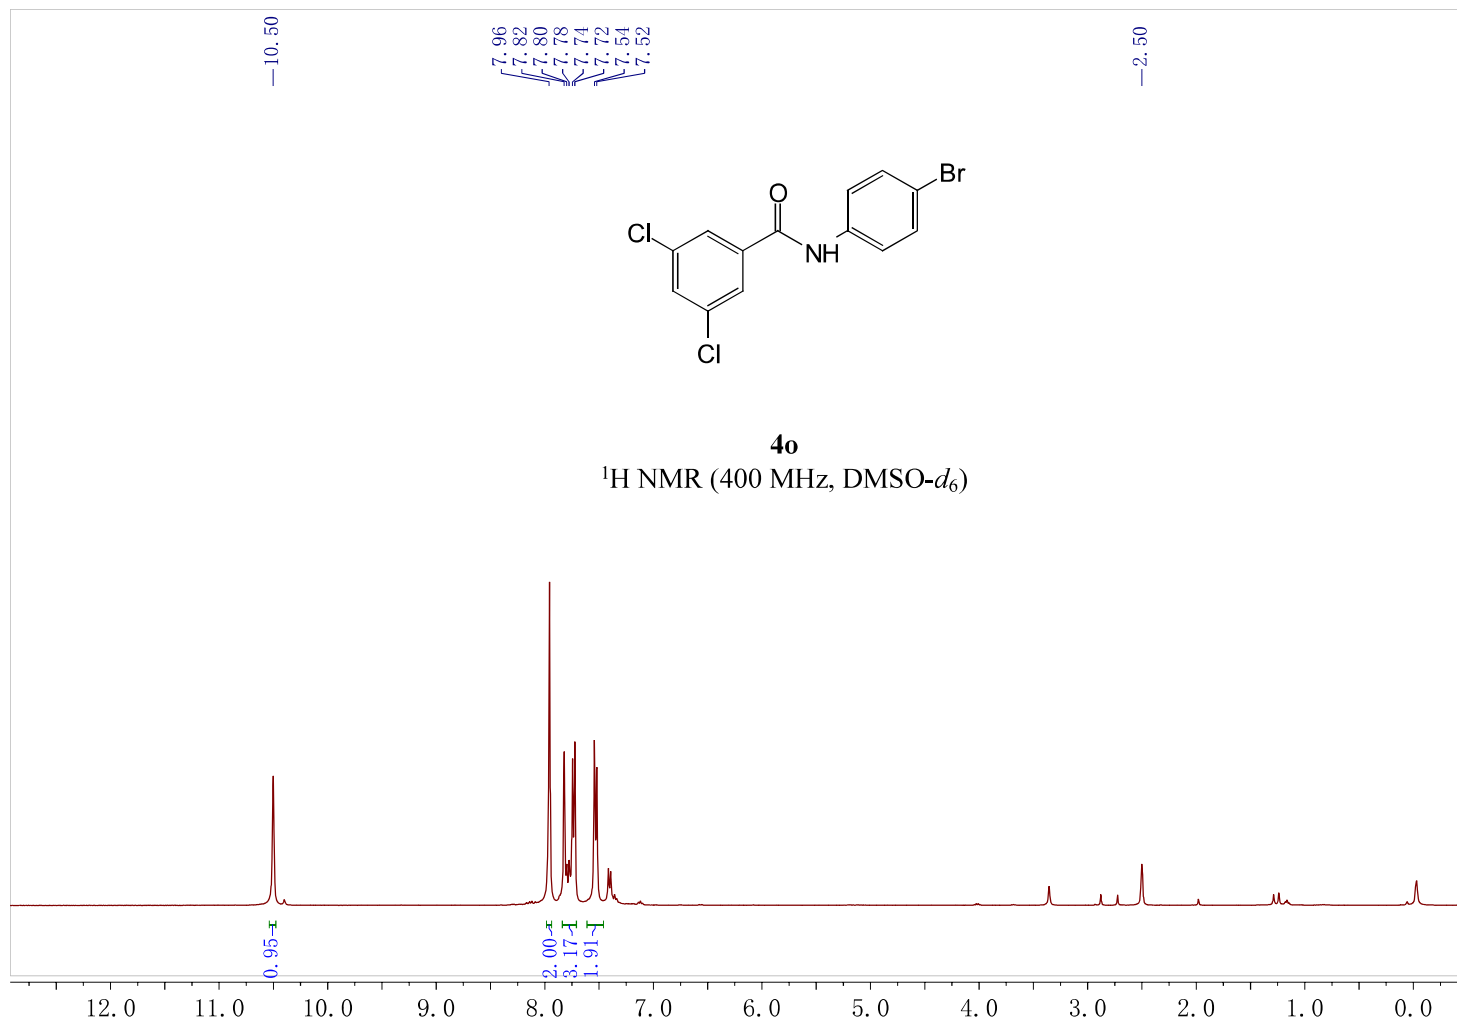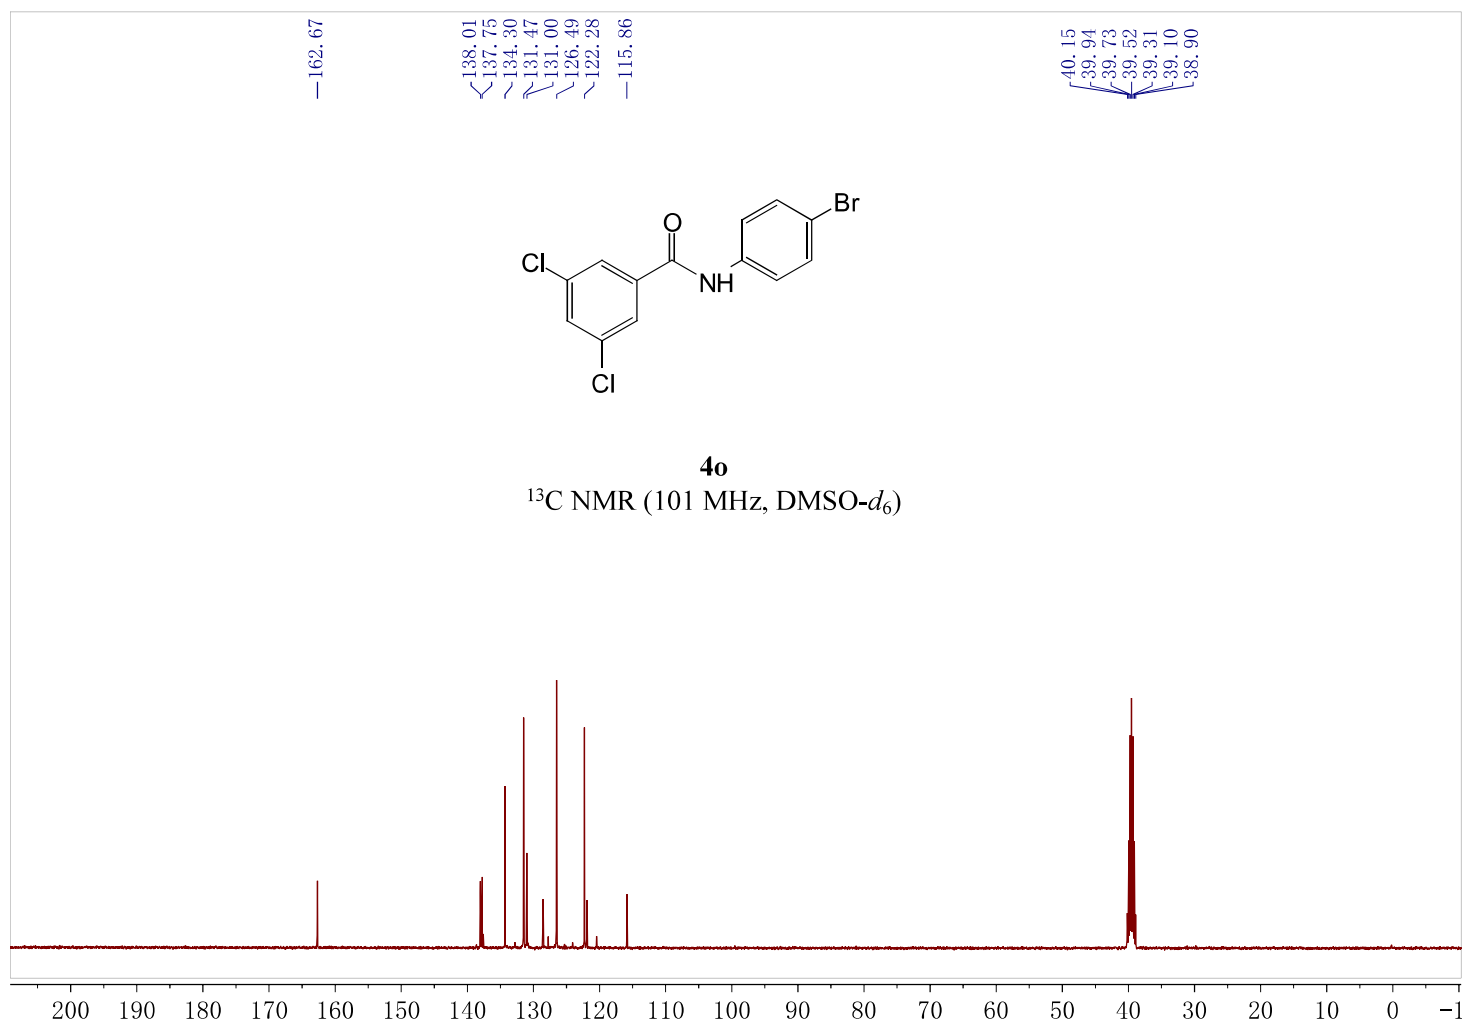

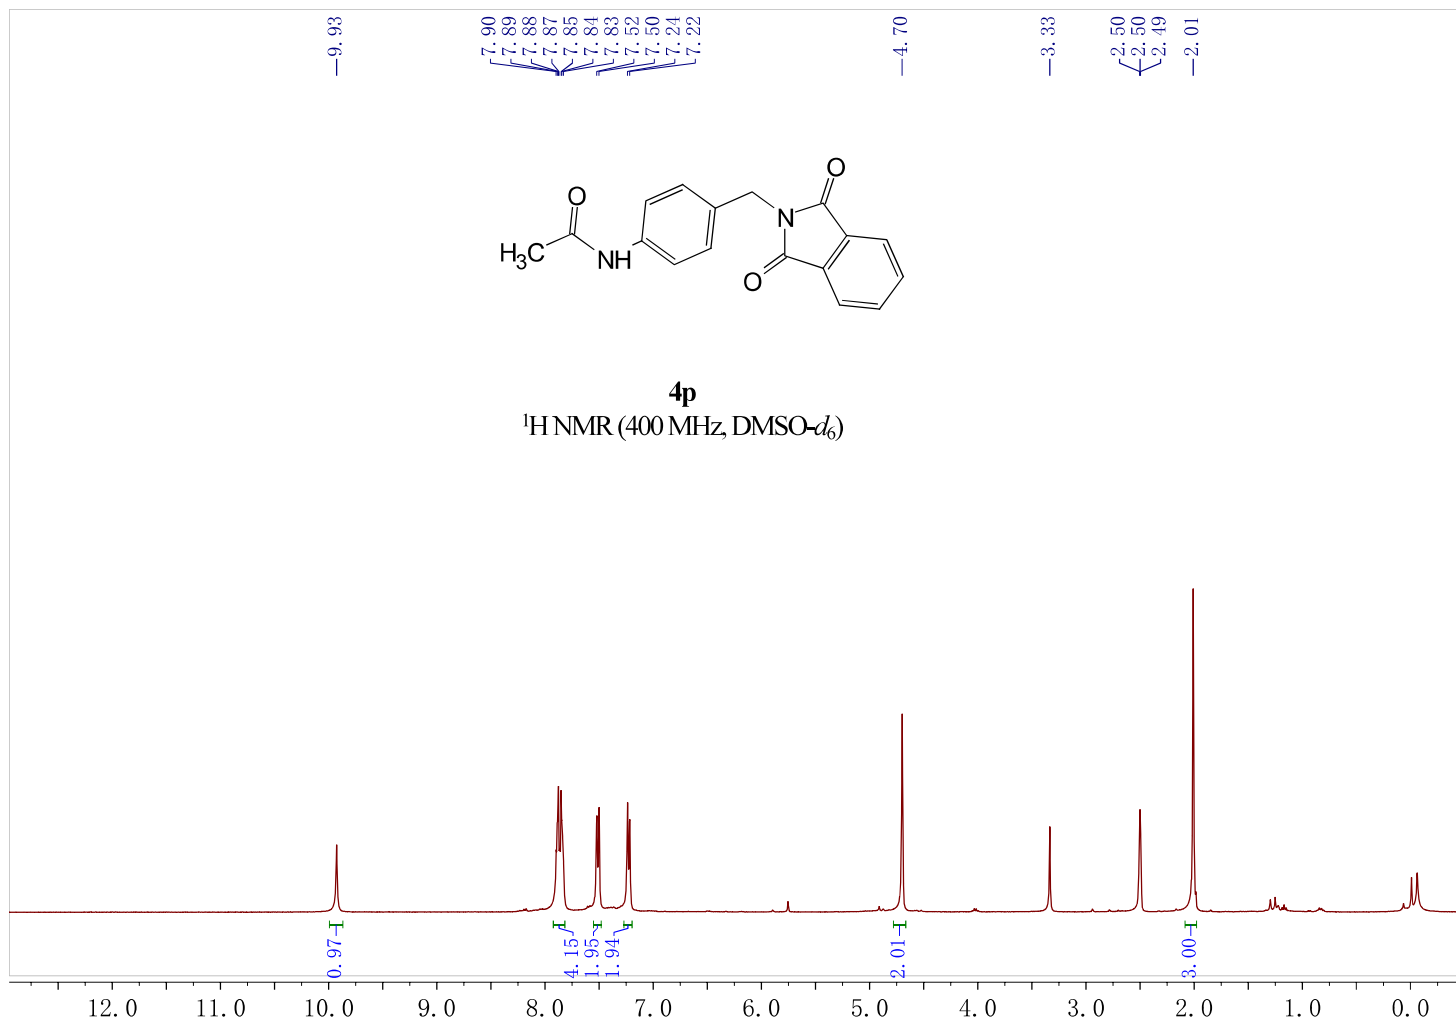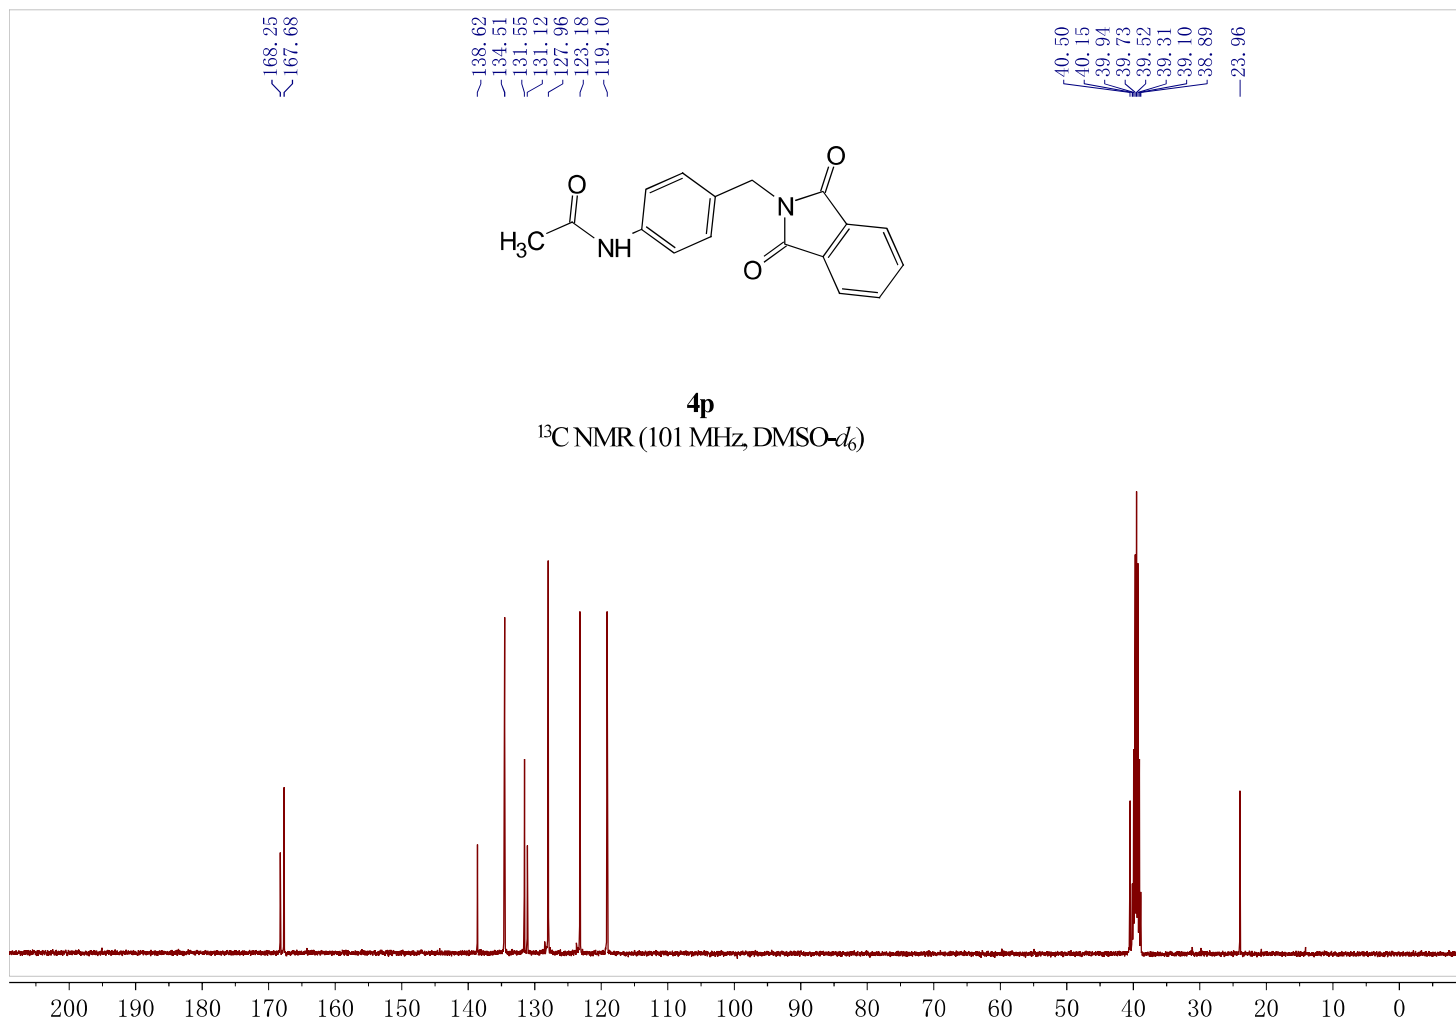

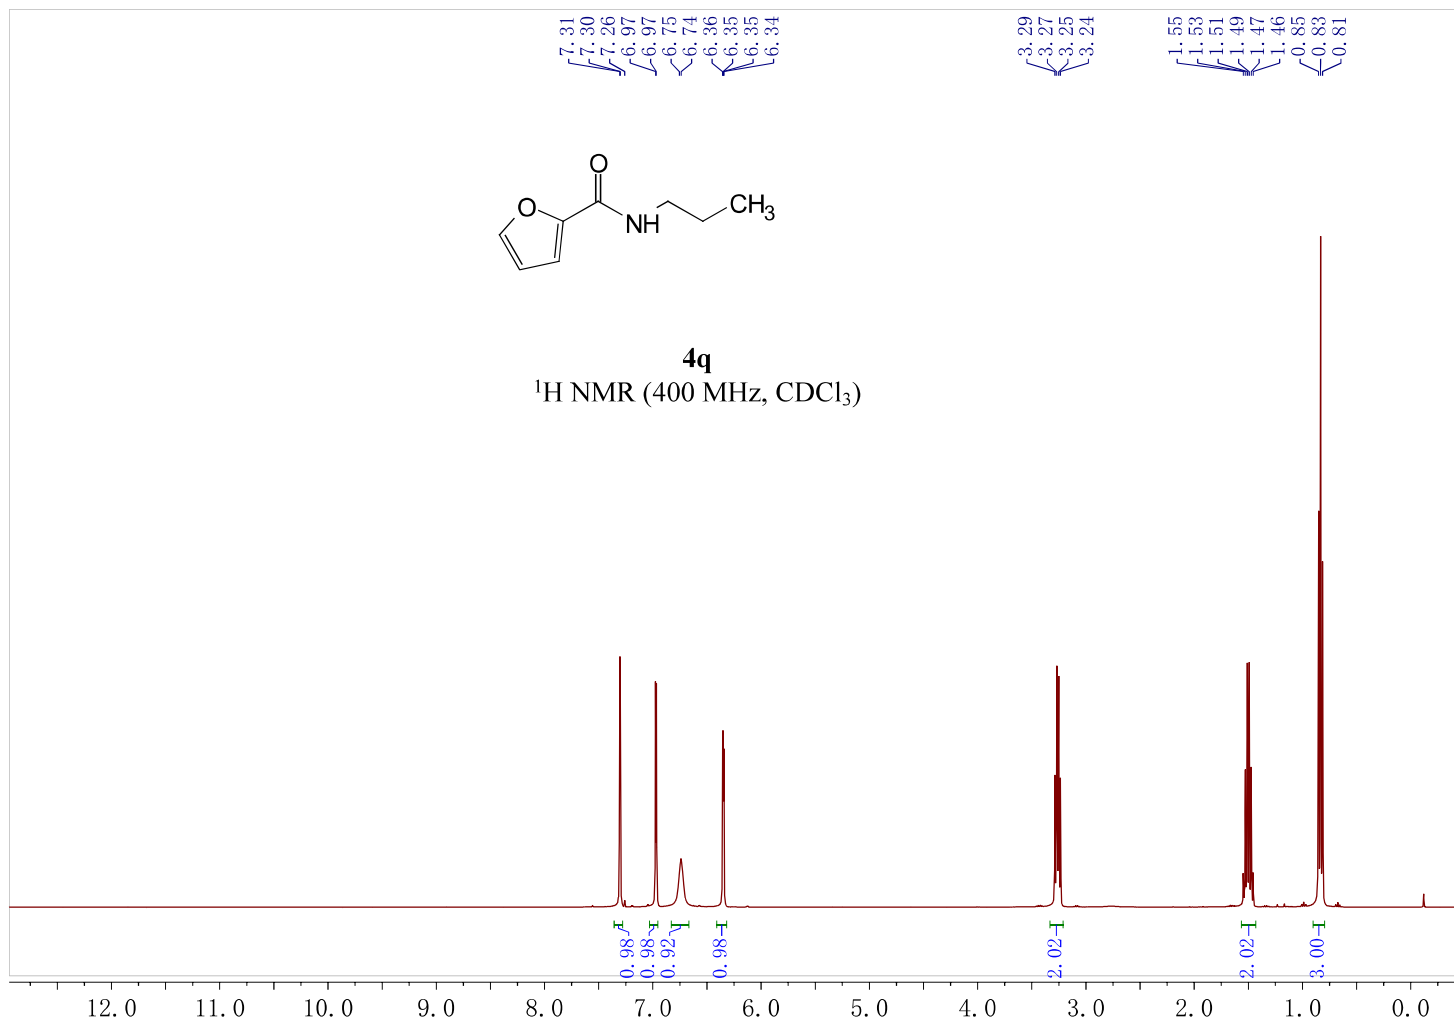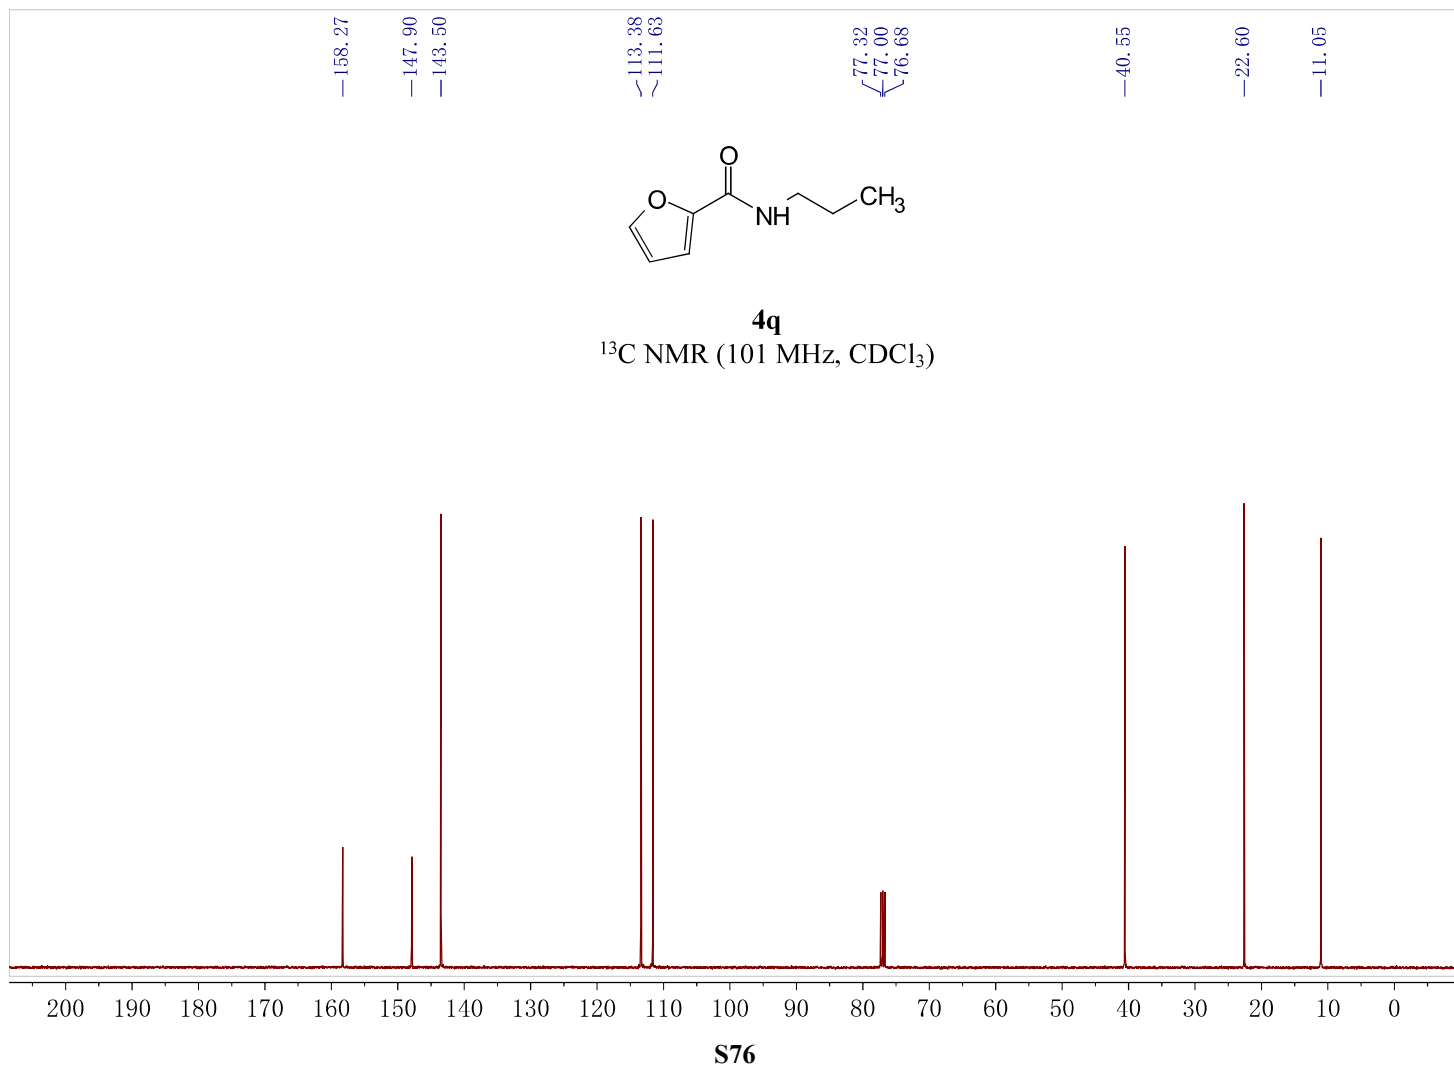

Supplement: d3qo02111d1.pdf [file d3qo02111d1.pdf]
